# Supplementary material for: A phosphorus-based olefin linked fully conjugated polymeric ligand for palladium-catalyzed trans-selective dicarbofunctionalization of internal alkynes
Source: Royal Society of Chemistry journal article supplement (doi:10.1039/d3ta03280a), 2023-01-01

Supporting Information

**A phosphorus-based olefin linked fully conjugated polymeric ligand for palladium-catalysed *trans*-selective dicarbofunctionalization of internal alkynes**

Pramod Kumar and Biplab Maji\*

*Department of Chemical Sciences, Indian Institute of Science Education and Research*

*Kolkata, Mohanpur 741246, India.*

## Table of contents

| Section |                                                                                                                      | Page No.   |
|---------|----------------------------------------------------------------------------------------------------------------------|------------|
| SM-I    | General information                                                                                                  | SI3-SI4    |
| SM-II   | Synthesis of building block                                                                                          | SI5-SI6    |
| SM-III  | Synthesis of monomers and their characterizations                                                                    | SI6-SI7    |
| SM-IV   | Synthesis and characterization of PKPOP                                                                              | SI8-SI17   |
| SM-V    | Synthesis and characterization of Pd@PKPOP                                                                           | SI18-SI22  |
| SM-VI   | Synthesis of homogeneous metal complexes and their characterizations                                                 | SI22-SI27  |
| SM-VII  | Synthetic protocols for the formation of reactants                                                                   | SI28-SI31  |
| SM-VIII | The catalytic activity of Pd@PKPOP                                                                                   | SI31-SI51  |
| SM-IX   | Practical usability of Pd@PKPOP                                                                                      | SI51-SI54  |
| SM-X    | Characterization of Pd@PKPOP after catalysis                                                                         | SI54-SI55  |
| SM-XI   | Controlled experiments and mechanistic investigations                                                                | SI56-SI59  |
| SM-XII  | Molecular structure and crystal data                                                                                 | SI60-SI64  |
| SM-XIII | Synthesis, characterizations and catalytic activity of other polymeric ligands for dicarbofunctionalization reaction | SI64-SI69  |
| SM-XIV  | References                                                                                                           | SI70       |
| SM-XV   | Copies of $^1\text{H}$ , $^{13}\text{C}$ , $^{19}\text{F}$ , $^{31}\text{P}$ NMR spectra                             | SI71-SI132 |

## **Section SM-I: General Information**

All the reactions were performed in oven-dried glassware under an inert atmosphere. Solvents were dried under the standard protocol and were degassed and stored over activated molecular sieves (4 Å). The chemicals were purchased from Sigma Aldrich, Avra Synthesis, TCI, Alfa Aesar, Spectrochem, BLDpharm, and Combi-Blocks, and used without further purification unless otherwise mentioned. For thin-layer chromatography (TLC) analysis, Merck precoated TLC plates (silica gel 60 F254/ 0.25 mm) were used. Visualization was accomplished by UV light (254 nm and 365 nm). Thermal reactions have been performed under oil-bath, the reaction temperatures are disclosed as the bath temperature surrounding the vessel unless otherwise mentioned.

**Nuclear magnetic resonance (NMR)** spectra were collected using BRUKER ( $^1\text{H}$ : 500 MHz,  $^{13}\text{C}$ : 126 MHz,  $^{19}\text{F}$ : 471 MHz,  $^{31}\text{P}$ : 162 MHz) and JEOL ( $^1\text{H}$ : 400 MHz,  $^{13}\text{C}$ : 101 MHz,  $^{19}\text{F}$ : 376 MHz,  $^{31}\text{P}$ : 130 MHz) instrument. NMR data was taken in the ppm unit and referenced against the TMS residual peaks. Coupling constants ( $J$ ) are reported in Hertz (Hz). Coupling patterns are indicated as s (singlet), d (doublet), t (triplet), q (quartet), p (pentet), sep (septet), dd (doublet of doublet), ddd (doublet of doublet of doublet), td (triplet of doublet), dt (doublet of triplet), tt (triplet of triplet) or m (multiplet).

**Gas Chromatography-Mass Spectrometry (GC-MS)** was performed on a Thermo Scientific ISQ QD Mass Spectrometer attached with Thermo Scientific TRACE 1300 gas chromatograph using an HP-5 ms capillary column (30 m  $\times$  0.25 mm  $\times$  0.25  $\mu\text{m}$ , J&W Scientific) with helium as the carrier gas.

**High-resolution electrospray ionization mass spectrometry (ESI-HRMS)** was performed in Bruker microTOF-Q II Spectrometer. The samples were prepared simply by dissolving solid or liquid substrates in MeOH or  $\text{CH}_3\text{CN}$  ( $10^{-3}$  to  $10^{-5}$  M).

**Powder X-ray diffraction (PXRD)** data were collected by using a XEUSS system using a Genix micro source from Xenocs operated at 50 kV and 0.6 mA. The  $\text{Cu K}\alpha$  radiation ( $\lambda = 1.54 \text{ \AA}$ ) was collimated with FOX2D mirror and two pairs of scattering less slits from Xenocs. The 2D patterns were recorded on a Mar345 image plate and processed using Fit2D software. All the measurements have been made in the transmission mode. The sample to detector distance calibrated with silver behenate standard is 220.8 mm for PXRD measurement.

**Single Crystal X-Ray Diffraction (SCXRD)** data for the crystal was collected at 100 K or 113 K on Rigaku (dual,  $\text{Cu/Mo}$  at zero, Eos) diffractometer using monochromatic  $\text{CuK}\alpha$  ( $\lambda = 1.54184$ ) and  $\text{MoK}\alpha$  ( $\lambda = 0.71073$ ), respectively. Structures were solved by Using Olex2 in the Superflip structure solution program by charge flipping and refined with the least squares minimization SHELXL refinement program.

**Fourier transform infrared (FT-IR)** spectra of the solid samples were recorded on a Bruker Optics ALPHA II spectrometer with a universal Zn-Se ATR (attenuated total reflection) accessory. All the data have been reported in the wavenumber ( $\text{cm}^{-1}$ ) scale.

**Nitrogen adsorption experiments** (0 to 1 bar) were performed using Quantachrome Quadrasorb automatic and Autosorb iQ instrument. The nitrogen adsorption isotherms were collected at 77 K using a liquid nitrogen bath. Before performing gas adsorption experiments, PKPOP and Pd@PKPOP were degassed at 120 °C for 12 hrs under vacuum. Surface areas were

calculated using the Brunauer-Emmett-Teller (BET) model applied between  $p/p^0$  values of 0.05 and 0.3 for microporous and mesoporous PKPOP. Corresponding pore size distributions were calculated using the non-localized density functional theory (NLDFT).

**Thermogravimetric analysis (TGA)** was carried out on a Mettler-Toledo TG50 and SDT Q600 TG-DTA analyzer under  $N_2$  atmosphere from 30 °C to 900 °C along with a ramp rate of 10 °C  $min^{-1}$ . Before carrying out the TGA, the samples were activated at 100°C for 30 minutes to eliminate the water from the samples.

**Field Emission Scanning Electron Microscopy (FESEM)** images were obtained using Zeiss SUPRA 55 VP FESEM operating at 10 kV using tungsten filament as the electron source. The samples were sputtered with gold (nano-sized film) before the imaging using an SCD 040 Balzers Union sputterer to avoid charging during FESEM analyses. The samples were prepared simply by putting a drop of dispersed samples (PKPOP and Pd@PKPOP) in isopropanol on a clean piece of silicon wafer. Elemental mapping of the PKPOP and Pd@PKPOP were also recorded using FESEM with energy dispersive X-ray analysis (EDAX). In these cases, samples were prepared by solid sample coating on a non-porous and conductive adhesive carbon strip.

**Transmission Electron Microscopy (TEM)** images were obtained using UHR FEGTEM, DST-FIST facility of IISER Kolkata at an accelerating voltage of 200 kV. The samples were prepared by direct drop casting (dispersed in isopropanol) onto copper grids TEM Window (TED PELLA, INC. 200 mesh).

**Inductively Coupled Plasma - Optical Emission Spectrometer (ICP-OES)** analysis by the Thermo Scientific instrument (Model no. ThermoCAP-7400) with Qtegra software. Analytical wavelength for metals detection was selected based on intensity counts and background interference. Operating condition for ICP-OES are given as follow- [Power-1150, Coolant Flow-12 L/min, Auxiliary Flow-0.50 L/min, Nebulizer Flow-0.50 L/min, Additional Flow-0 L/min, Nebulizer gas pressure-210 kPa, Plasma torch- Quartz, Spray chamber- Cyclonic, Carrier gas- Argon].

**X-ray Photoelectron Spectroscopy (XPS)** analysis was carried out using Thermo Scientific's K-Alpha+ spectrometer. The pass energy for the survey scan and the high-resolution scan was maintained at 100 eV and 50 eV, respectively, where the angle between the analyzer and sample surface was 90°. In the case of deconvoluted spectra, first, the spectra were analyzed and fitted by Fityk 1.3.1 software.

**Dynamic Light Scattering (DLS)** measurement was carried out using Malvern Zetasizer Nano ZS (Malvern Instruments Ltd., UK) equipped with a He-Ne laser (wavelength: 633 nm). First, 0.5 mg PKPOP was dispersed into 5.0 mL 2-isopropanol for 2 h. Thereafter, 200.0  $\mu$ L was taken out and further diluted into 1.0 mL fresh 2-isopropanol. It was further dispersed for another 2 hr. 20  $\mu$ L of the solution was taken into a quartz cuvette and filled with 0.8 mL 2-isopropanol to carry out the experiment for the determination of the size of hollow spheres.

## Section SM-II: Synthesis of Building Block

### Synthesis of 4,4',4''-phosphanetriyltribenzaldehyde (**BB1**)

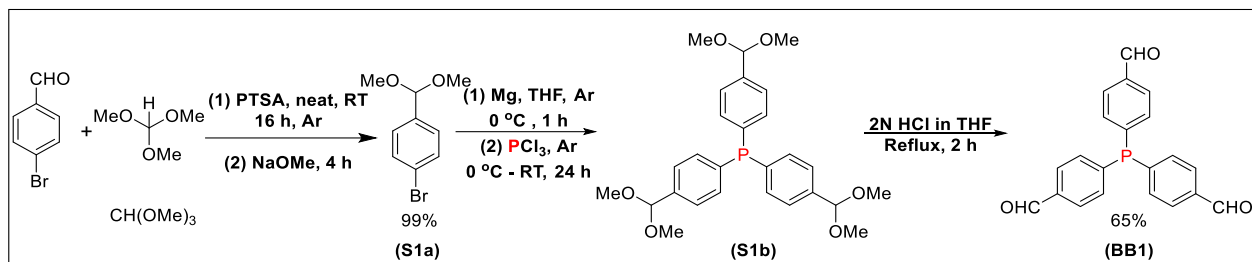

**Figure S1:** Schematic protocol for the synthesis of 4,4',4''-phosphanetriyltribenzaldehyde (**BB1**)

**(BB1)** was synthesized by following a reported procedure with some modification<sup>1</sup>. 4-bromobenzaldehyde (18.50 g, 100.0 mmol) was taken in 250 mL oven-dried RB charged with a magnetic bar. The reactant was dried over a high vacuum for 5 min before adding trimethoxymethane (10.62 g, 100.1 mmol) to give a turbid solution. Dried *p*-toluenesulphonic acid (PTSA) (0.86 g, 5.0 mmol) was added as a catalyst, making the solution clear with a small amount of heat liberation. The solution was capped tightly and kept for stirring for 16 h at room temperature. After confirming from TLC monitoring, sodium methoxide NaOMe (0.32g, 6.0 mmol) was added and allowed to stir for another 4 h to quench the acid. The whole solution was directly transferred to the column chromatography. Hexane:ethylacetate (99:1) mixture was used as eluent to purify the product. After removing the solvent under reduced pressure, the colorless oily compound **S1a** was obtained with 99% yield.

Oven-dried Mg turnings (0.53 g, 22.0 mmol) were taken in oven-dried Schleck RB, equipped with a magnetic stir bar. The whole set up was flame dried under an inert atmosphere. After cooling to rt, 25 mL of anhydrous THF was poured into the RB. A pinch of molecular iodine was added that turned the color of the solution brown. Under stirring conditions, **S1a** (4.62 g, 20 mmol) was added slowly. After the addition was completed, the set up was capped with rubber septa and allowed to stir at 40 °C in a water bath under inert conditions. The solution was observed carefully, and once it started becoming colorless, it was removed from the water bath and continued stirring further at room temperature for 1 h. Further, the whole set up was kept under an ice bath, and freshly distilled PCl<sub>3</sub> (0.69 g, 5.0 mmol) was added dropwise and continued stirring for 1 h under the ice bath. Then-after, the reaction was allowed to stir at room temperature for 24 h. The reaction mixture was quenched with saturated NH<sub>4</sub>Cl solution under an ice bath. The quenched reaction mixture was filtered with a cotton pad, and the reaction mixture was concentrated under reduced pressure. Further, ethyl acetate (3 x 20 mL) was used to extract the organic phase from the aqueous phase. The organic layer was washed with fresh distilled H<sub>2</sub>O, dried over anhydrous Na<sub>2</sub>SO<sub>4</sub>, and concentrated under reduced pressure. The crude compound (**S1b**) was diluted with 20 mL of 2 N HCl in THF (v/v) and was refluxed for 2 h. The mixture was allowed to attain room temperature, and a saturated solution of Na<sub>2</sub>CO<sub>3</sub> was added slowly to neutralize HCl with vigorous stirring under an ice bath. The reaction mixture was extracted with ethyl acetate (3 x 20 mL), washed with brine, and dried over anhydrous Na<sub>2</sub>SO<sub>4</sub>. The organic layer was concentrated through rotary evaporator, and a free-flowing slurry was made using 240-400 mesh silica gel, and a column was packed to purify the compound. The column was drained using ethyl acetate: hexane (10:90) to obtain the off-white

desired product **BB1** in 65% yield (4.5 g, 13.0 mmol). The purity of the compound was checked with NMR and found to be matched with the reported value in the literature.<sup>1</sup>  $^1\text{H}$  NMR (500 MHz,  $\text{CDCl}_3$ )  $\delta$  10.01 (s, 3H), 7.86 (d,  $J$  = 8.0 Hz, 6H), 7.46 (t,  $J$  = 7.9 Hz, 6H).  $^{13}\text{C}$  NMR (126 MHz,  $\text{CDCl}_3$ )  $\delta$  191.7, 143.2 (d,  $J$  = 14.7 Hz), 136.9, 134.3 (d,  $J$  = 20.4 Hz), 129.8 (d,  $J$  = 7.4 Hz).  $^{31}\text{P}$  NMR (162 MHz,  $\text{CDCl}_3$ )  $\delta$  -3.38.

### Section SM-III: Synthesis of monomers and their characterizations

#### Synthesis of PKMONO

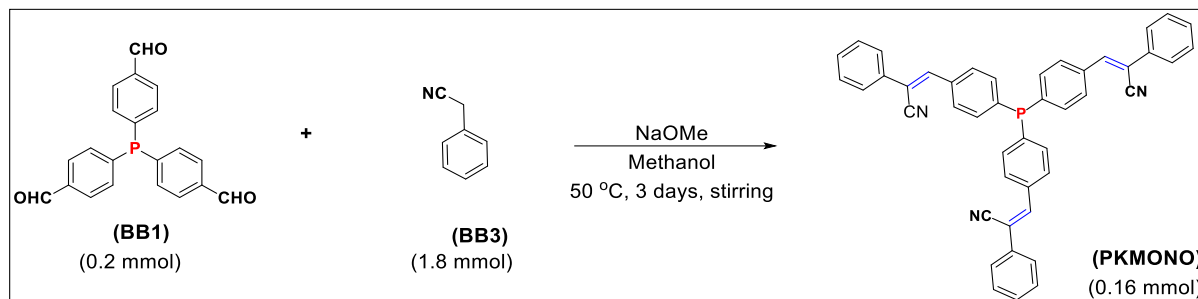

**Figure S2:** Schematic protocol for the synthesis of **PKMONO**

In a 16 mL reaction tube, 4-formyl(triphenyl)phosphine (**BB1**, 0.20 mmol, 69.2 mg) and 2-phenylacetonitrile (**BB3**, 1.80 mmol, 210.6 mg, 206.5  $\mu\text{L}$ ) were taken and dissolved in 5.0 mL methanol. Sodium methoxide (0.60 mmol, 32.4 mg) was then added. The solution was degassed for 0.5 h by passing nitrogen, thereafter capped tightly. It was allowed to stir for 3 days at 50 °C. The light greenish color precipitate was filtered and washed thoroughly with methanol. The collected precipitate was dried under vacuum overnight to get 80% yield (103.0 mg, 0.16 mmol).  $^1\text{H}$  NMR (500 MHz,  $\text{CDCl}_3$ )  $\delta$  7.83 (d,  $J$  = 8.2 Hz, 6H), 7.62 (dd,  $J$  = 7.3, 2.0 Hz, 6H), 7.47 (s, 3H), 7.40 – 7.32 (m, 15H).  $^{13}\text{C}$  NMR (126 MHz,  $\text{CDCl}_3$ )  $\delta$  141.3, 139.4 (d,  $J$  = 13.4 Hz), 134.6, 134.4, 134.3 (d,  $J$  = 20.0 Hz), 129.6, 129.5 (d,  $J$  = 7.2 Hz), 129.3, 126.2, 117.9, 112.8.  $^{31}\text{P}$  NMR (203 MHz,  $\text{CDCl}_3$ )  $\delta$  -4.91.

$^1\text{H}$  NMR (500 MHz,  $\text{DMSO}-d_6$ )  $\delta$  8.08 (s, 3H), 8.00 (d,  $J$  = 7.8 Hz, 6H), 7.78 (d,  $J$  = 7.6 Hz, 6H), 7.55 – 7.52 (m, 6H), 7.50 – 7.45 (m, 9H).  $^{13}\text{C}$  NMR (126 MHz,  $\text{DMSO}-d_6$ )  $\delta$  142.0, 138.7 (d,  $J$  = 13.7 Hz), 134.5, 133.8 (d,  $J$  = 19.5 Hz), 133.6, 129.42, 129.36, 129.2, 125.8, 117.7, 111.2.  $^{31}\text{P}$  NMR (203 MHz,  $\text{DMSO}-d_6$ )  $\delta$  -6.08. IR (ATR/ $\text{cm}^{-1}$ ) 3060.9, 3025.8, 2962.7, 2927.7, 2850.5, 2213.6, 1588.2, 1546.1, 1497.0, 1447.9, 1398.8, 1356.7, 1314.7, 1251.6, 1188.4, 1160.4, 1118.3, 1097.3, 1090.3, 1076.2, 1034.6, 1013.1, 900.9, 816.7, 753.6, 683.5, 641.4, 627.4. HRMS (ESI)  $m/z$  calcd. for  $\text{C}_{45}\text{H}_{31}\text{N}_3\text{P}$  ( $[\text{M}+\text{H}]^+$ ) 644.2250, found  $m/z$  644.2277

#### Synthesis of (Z)-2,3-diphenylacrylonitrile (BB5)

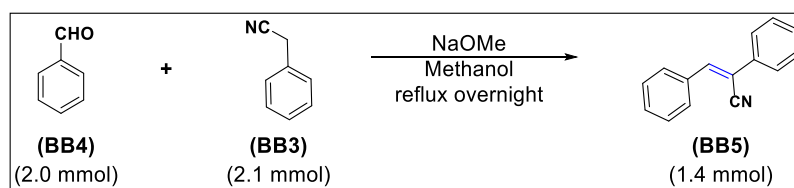

**Figure S3:** Schematic protocol for the synthesis of (Z)-2,3-diphenylacrylonitrile (**BB5**)

A 16 mL reaction tube was charged with benzaldehyde (2.0 mmol, 212.2 mg, 204.0 uL) (**BB4**), and 2-phenylacetonitrile (2.1 mmol, 245.7 mg, 240.9 uL) (**BB3**) has been taken and dissolved in 2.0 mL methanol. Further, sodium methoxide (0.80 mmol, 43.2 mg) was added and capped tightly. It was allowed to reflux overnight. The clear solution was kept aside to attain RT where the product (*Z*)-2,3-diphenylacrylonitrile (**BB5**) was precipitated. The solid product was filtered and washed with cold ethanol and water. It was vacuum dried to get 70% yield (287.1 mg, 1.4 mmol). The purity of the compound was checked with NMR and found to be matched with the reported values.<sup>2</sup> <sup>1</sup>H NMR (500 MHz, CDCl<sub>3</sub>) δ 7.78 (d, *J* = 7.9 Hz, 2H), 7.57 (d, *J* = 7.8 Hz, 2H), 7.43 (s, 1H), 7.39 – 7.26 (m, 6H). <sup>13</sup>C NMR (126 MHz, CDCl<sub>3</sub>) δ 142.3, 134.6, 133.8, 130.6, 129.4, 129.3, 129.2, 129.0, 126.1, 118.1, 111.8. <sup>1</sup>H NMR (500 MHz, DMSO-*d*<sub>6</sub>) δ 8.05 (s, 1H), 7.95 (d, *J* = 7.6 Hz, 2H), 7.78 (d, *J* = 7.3 Hz, 2H), 7.58 – 7.45 (m, 6H). <sup>13</sup>C NMR (126 MHz, DMSO-*d*<sub>6</sub>) δ 142.9, 133.73, 133.69, 130.5, 129.2, 129.12, 129.06, 128.9, 125.7, 117.8, 110.4. IR(ATR/cm<sup>-1</sup>) 3036.4, 2216.9, 1601.3, 1482.7, 1445.9, 1349.3, 1247.2, 1011.7, 982.25, 929.0, 903.0, 749.3, 684.8, 629.0, 574.0.

## Section SM-IV: Synthesis and characterization of PKPOP

### Synthesis of PKPOP

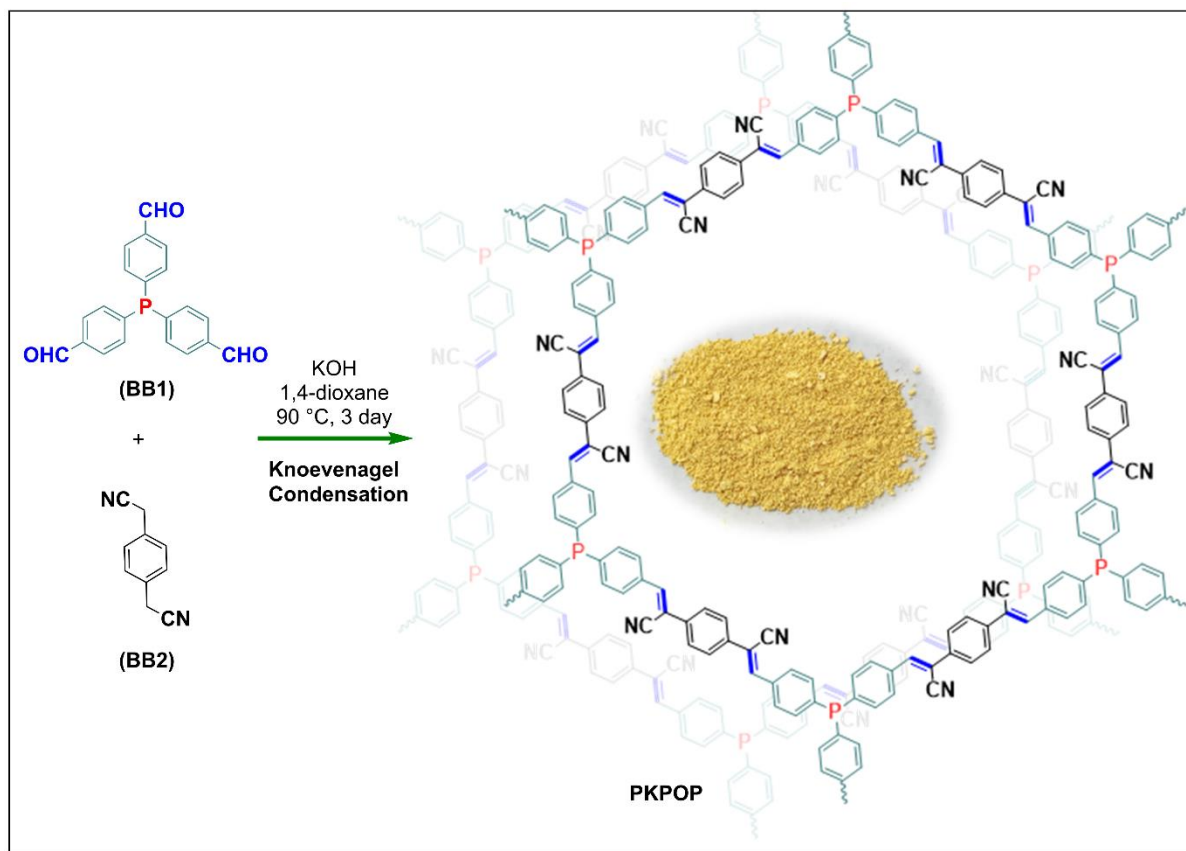

**Figure S4:** Schematic protocol for the synthesis of **PKPOP**

In a 16 mL reaction tube, 4-formyl(triphenyl)phosphine (**BB1**, 0.036 mmol, 8.3 mg) and phenyl-1,4-diacetonitrile (**BB2**, 0.048 mmol, 5.7 mg) were taken and degassed using Schleck line. Under inert conditions, pre-degassed 1,4-dioxane (three times freeze-pump-thaw cycle) (0.9 mL) was poured into the reaction tube. 4M aq. KOH solution (0.1 mL) was then added. The reaction was capped under an inert condition and sonicated for 5 min. Thereafter, it was kept in a pre-heated oil bath at 90 °C for 3 days without stirring. This reaction was kept in multiple batches. After completion of the reaction, a greenish color precipitate (ppt.) was obtained and was filtered using general filter paper and sequentially washed with dimethylformamide (DMF), methanol, acetone, 1M aq. HCl solution, H<sub>2</sub>O, acetone, and methanol. Upon washing with 1M aq. HCl solution, the color of the ppt. changed to bright yellow. Further, it was stirred for 2 days in the DMF solution at 140 °C, collected after centrifugation, and further washed with refluxing methanol for 1 day. Finally, it was centrifuged and dried under high vacuum at 120 °C for 12 h to obtain bright yellow color solid in 95% yield. The material is named **PKPOP**.



## Characterization of **PKPOP**

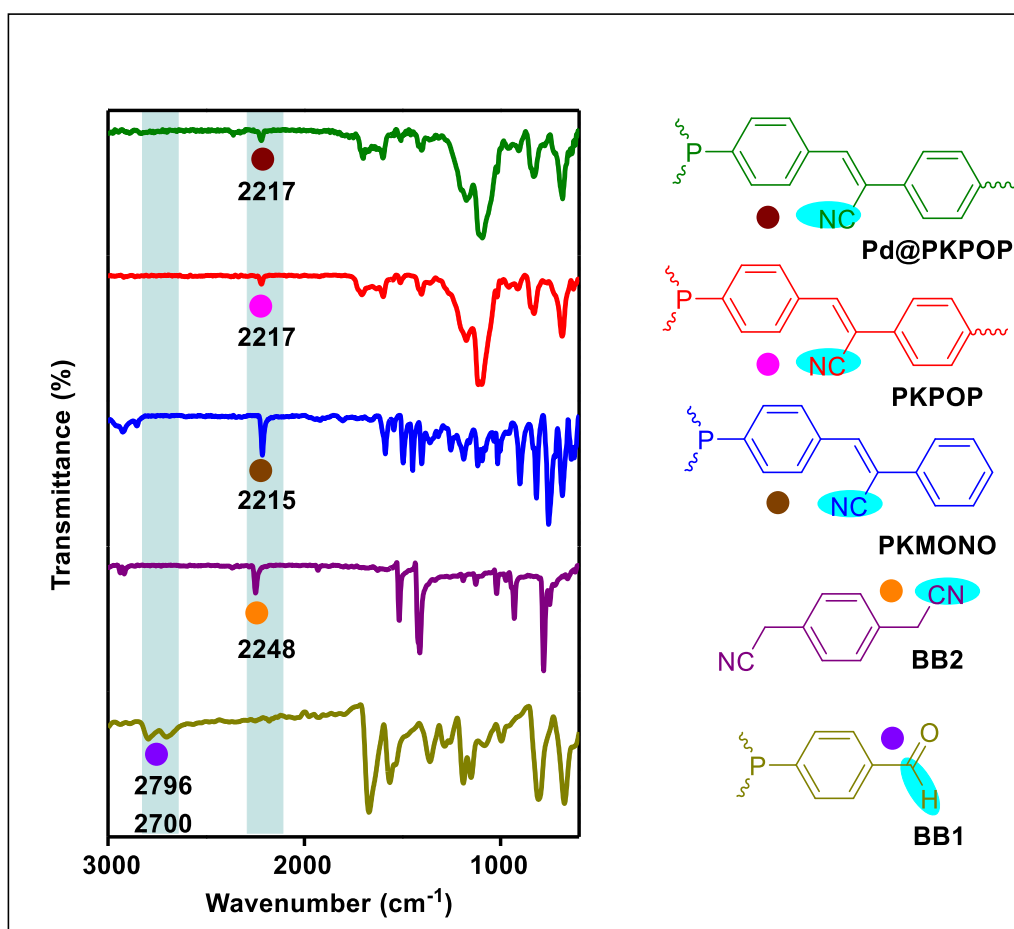

**Figure S5:** FT-IR spectrum of 4-formyl(triphenyl)phosphine (**BB1**), phenyl-1,4-diacetonitrile (**BB2**), **PKMONO**, **PKPOP** and **Pd@PKPOP**. The corresponding wavenumbers related to different functional groups in monomer as well as in polymer have been depicted schematically.

The Fourier-Transform Infrared (FT-IR) spectroscopy confirmed the formation of **PKPOP**. The disappearance of the formyl C-H band of 4-formyl(triphenyl)phosphine at  $2700 \text{ cm}^{-1}$  and  $2796 \text{ cm}^{-1}$ , authenticated the elimination of water molecules. Shifting of the CN band stretching towards a lower frequency ( $2248 \text{ cm}^{-1}$  in phenyl-1,4-diacetonitrile to  $2217 \text{ cm}^{-1}$  in **PKPOP**) corroborated the fully conjugative effect in the **PKPOP** due to partial conversion of the hybridization from  $sp$  to  $sp^2$ .

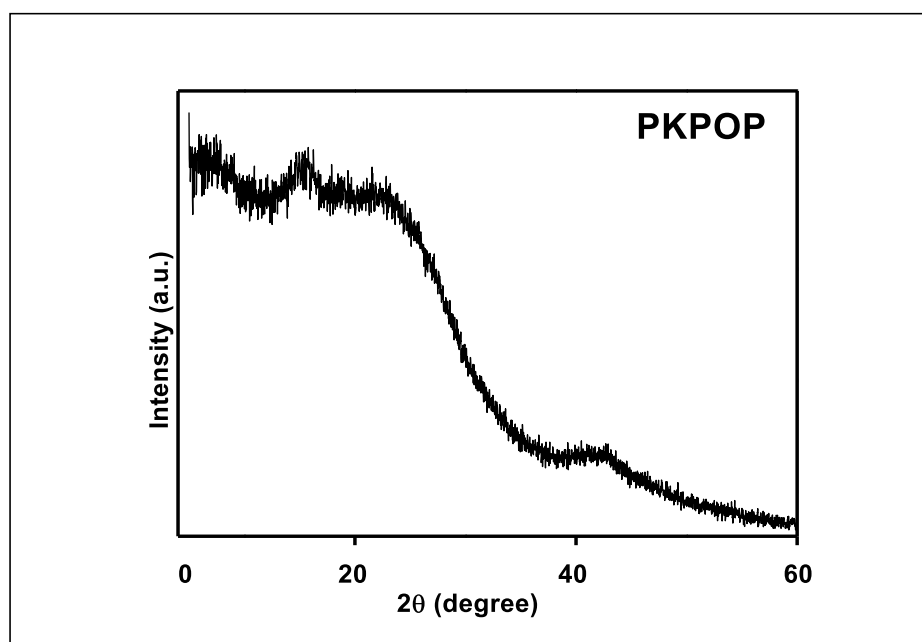

**Figure S6:** PXRD spectra of **PKPOP**. A broad peak from  $20^\circ$  to  $40^\circ$  indicates the  $\pi$ - $\pi$ -stacked amorphous nature of the material.

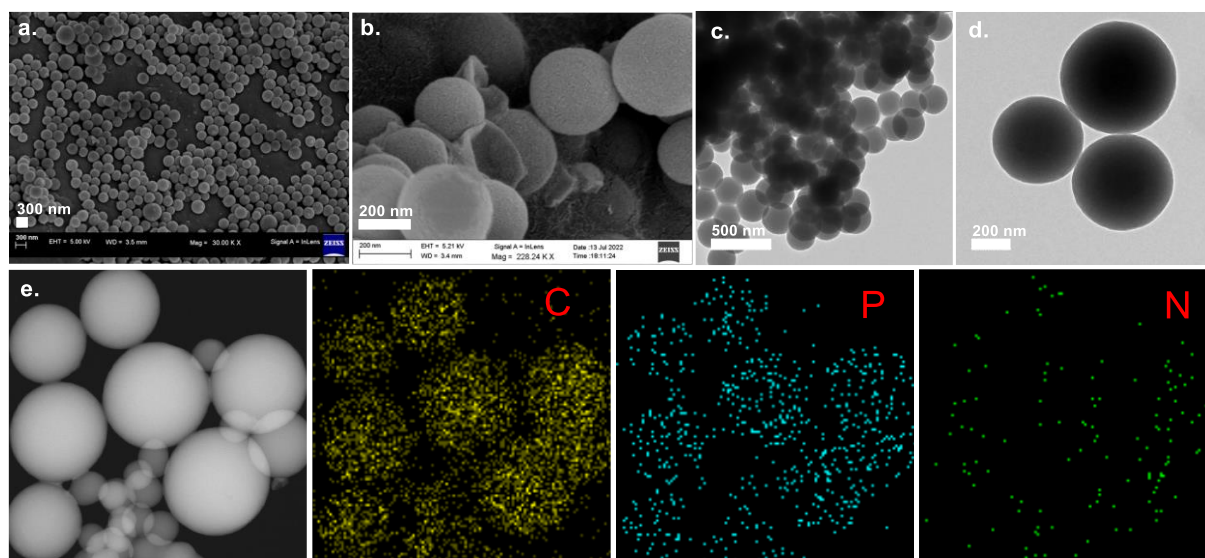

**Figure S7:** FESEM images of **PKPOP**. (a) low magnification, (b) high magnification. TEM images of **PKPOP**. (c) low magnification, (d) high magnification. (e) EDAX shows the elemental mapping of elements present in **PKPOP**.

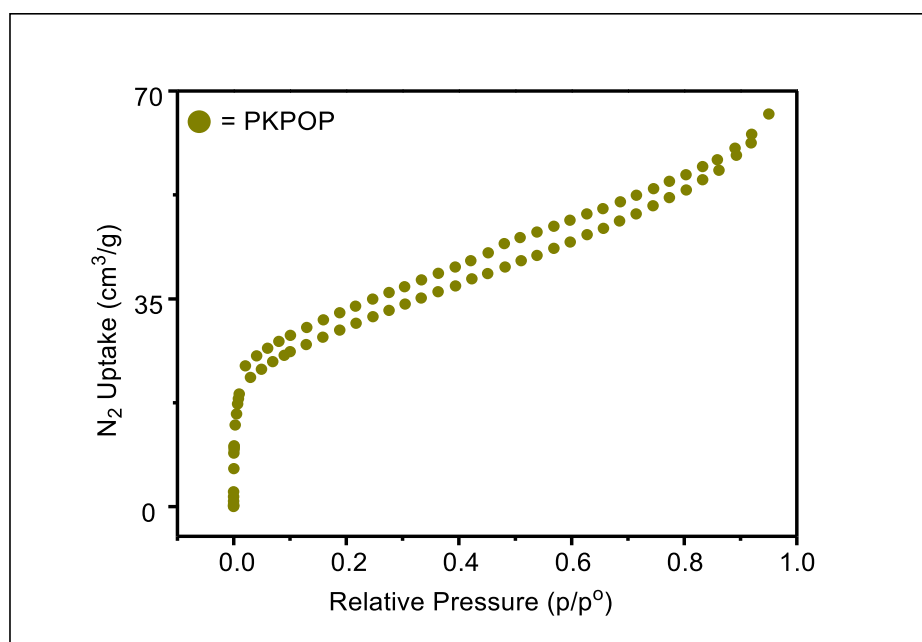

**Figure S8:** BET isotherm of **PKPOP**. Steep rise of curve at low pressure of Type II curve shows the filling of micropores and formation of monolayers afterwards. BET surface area measured was  $108 \text{ m}^2/\text{g}$

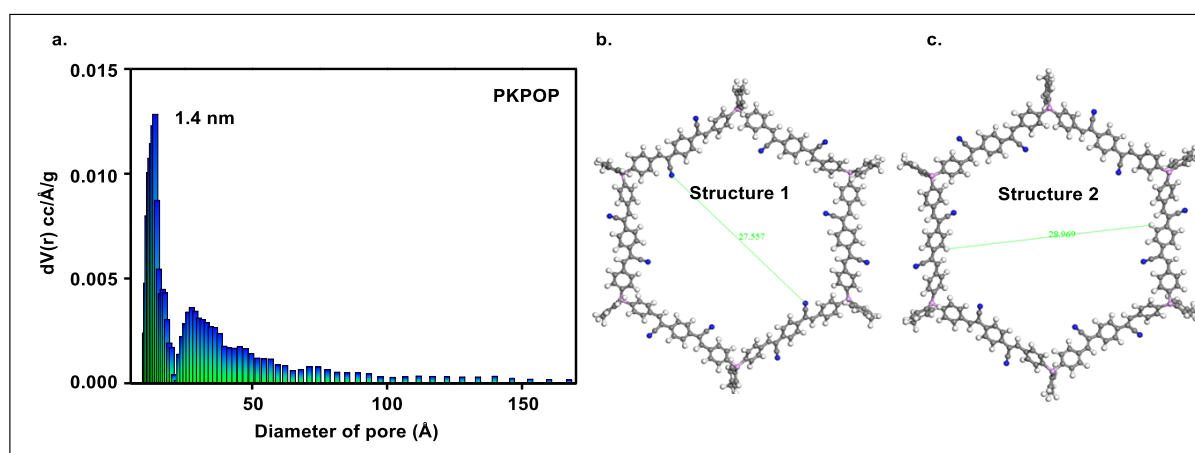

**Figure S9:** (a) Pore size distribution of **PKPOP** shows micropores having average diameter of 1.4 nm; (b, c) Upon optimization of energy and hexagonal geometry using Force Field method in Material Studio software, we found the pore size of 2.8 nm (CN to CN) (Structure 1) and 2.9 nm (H to H) (Structure 2). The decrement in the experimental pore size value shows that major part of **PKPOP** comprises of distorted or broken hexagonal structure

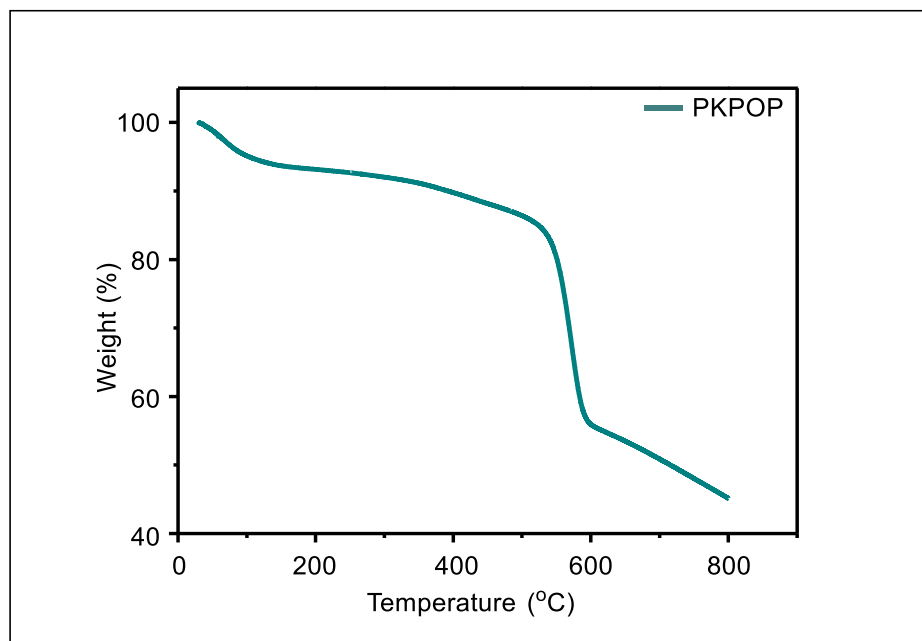

**Figure S10:** TGA curve showing thermal stability of **PKPOP** upto 500 °C

---

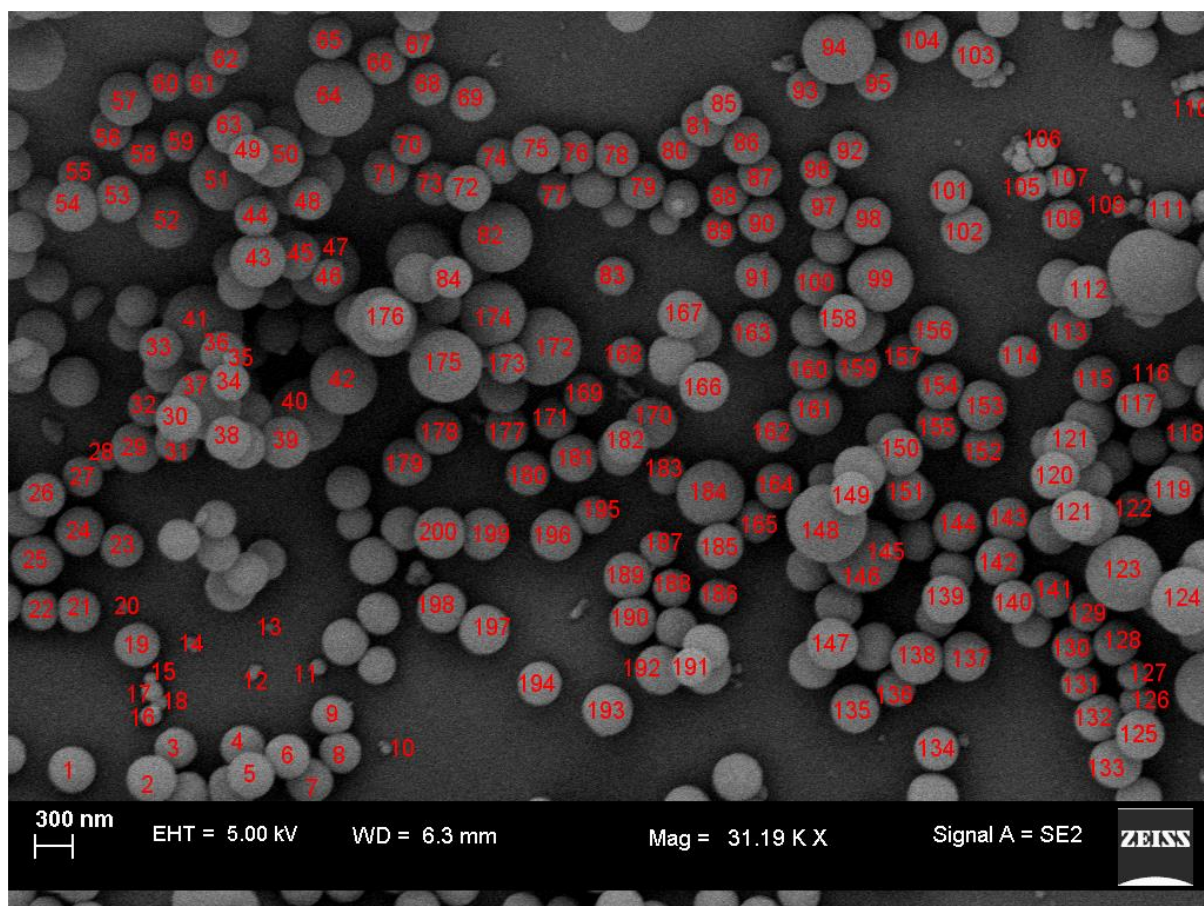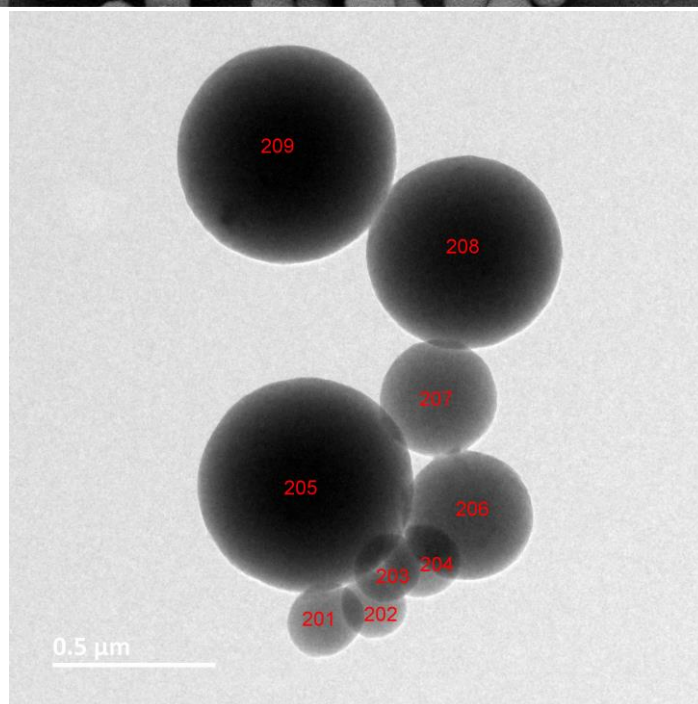

**Figure S11:** FESEM image and TEM image for the random measurement of the size of the spheres by measuring the diameter using Image J software

| S. No. | Label   | Length (nm) | Round off | S. No. | Label   | Length (nm) | Round off |
|--------|---------|-------------|-----------|--------|---------|-------------|-----------|
| 1      | 3D-R_02 | 409.158     | 410       | 49     | 3D-R_02 | 328.666     | 330       |
| 2      | 3D-R_02 | 434.851     | 430       | 50     | 3D-R_02 | 514.692     | 510       |
| 3      | 3D-R_02 | 365.685     | 370       | 51     | 3D-R_02 | 585.539     | 590       |
| 4      | 3D-R_02 | 384.199     | 380       | 52     | 3D-R_02 | 546.898     | 550       |
| 5      | 3D-R_02 | 392.204     | 390       | 53     | 3D-R_02 | 407.992     | 410       |
| 6      | 3D-R_02 | 395.909     | 400       | 54     | 3D-R_02 | 429.542     | 430       |
| 7      | 3D-R_02 | 393.172     | 390       | 55     | 3D-R_02 | 392.221     | 390       |
| 8      | 3D-R_02 | 367.147     | 370       | 56     | 3D-R_02 | 383.916     | 380       |
| 9      | 3D-R_02 | 366.006     | 370       | 57     | 3D-R_02 | 496.05      | 500       |
| 10     | 3D-R_02 | 102.104     | 100       | 58     | 3D-R_02 | 383.528     | 380       |
| 11     | 3D-R_02 | 150.472     | 150       | 59     | 3D-R_02 | 364.3       | 360       |
| 12     | 3D-R_02 | 100.698     | 100       | 60     | 3D-R_02 | 362.492     | 360       |
| 13     | 3D-R_02 | 77.218      | 80        | 61     | 3D-R_02 | 358.849     | 360       |
| 14     | 3D-R_02 | 132.043     | 130       | 62     | 3D-R_02 | 368.361     | 370       |
| 15     | 3D-R_02 | 114.765     | 110       | 63     | 3D-R_02 | 395.745     | 400       |
| 16     | 3D-R_02 | 193.742     | 190       | 64     | 3D-R_02 | 681.879     | 680       |
| 17     | 3D-R_02 | 196.316     | 200       | 65     | 3D-R_02 | 381.844     | 380       |
| 18     | 3D-R_02 | 157.161     | 160       | 66     | 3D-R_02 | 415.309     | 420       |
| 19     | 3D-R_02 | 393.641     | 390       | 67     | 3D-R_02 | 345.437     | 350       |
| 20     | 3D-R_02 | 108.09      | 110       | 68     | 3D-R_02 | 381.454     | 380       |
| 21     | 3D-R_02 | 369.478     | 370       | 69     | 3D-R_02 | 394.49      | 390       |
| 22     | 3D-R_02 | 347.137     | 350       | 70     | 3D-R_02 | 338.916     | 340       |
| 23     | 3D-R_02 | 382.882     | 380       | 71     | 3D-R_02 | 396.496     | 400       |
| 24     | 3D-R_02 | 408.477     | 410       | 72     | 3D-R_02 | 406.225     | 410       |
| 25     | 3D-R_02 | 463.16      | 460       | 73     | 3D-R_02 | 367.417     | 370       |
| 26     | 3D-R_02 | 380.413     | 380       | 74     | 3D-R_02 | 390.543     | 390       |
| 27     | 3D-R_02 | 354.373     | 350       | 75     | 3D-R_02 | 418.994     | 420       |
| 28     | 3D-R_02 | 195.557     | 200       | 76     | 3D-R_02 | 366.201     | 370       |
| 29     | 3D-R_02 | 432.626     | 430       | 77     | 3D-R_02 | 314.322     | 310       |
| 30     | 3D-R_02 | 390.812     | 390       | 78     | 3D-R_02 | 373.175     | 370       |
| 31     | 3D-R_02 | 345.553     | 350       | 79     | 3D-R_02 | 398.99      | 400       |
| 32     | 3D-R_02 | 333.31      | 330       | 80     | 3D-R_02 | 356.04      | 360       |
| 33     | 3D-R_02 | 366.877     | 370       | 81     | 3D-R_02 | 392.095     | 390       |
| 34     | 3D-R_02 | 332.993     | 330       | 82     | 3D-R_02 | 607.484     | 610       |
| 35     | 3D-R_02 | 132.324     | 130       | 83     | 3D-R_02 | 331.033     | 330       |
| 36     | 3D-R_02 | 380.486     | 380       | 84     | 3D-R_02 | 370.608     | 370       |
| 37     | 3D-R_02 | 592.714     | 590       | 85     | 3D-R_02 | 325.139     | 330       |
| 38     | 3D-R_02 | 387.236     | 390       | 86     | 3D-R_02 | 428.328     | 430       |
| 39     | 3D-R_02 | 445.25      | 450       | 87     | 3D-R_02 | 378.551     | 380       |
| 40     | 3D-R_02 | 637.358     | 640       | 88     | 3D-R_02 | 371.043     | 370       |
| 41     | 3D-R_02 | 682.978     | 680       | 89     | 3D-R_02 | 302.751     | 300       |
| 42     | 3D-R_02 | 588.901     | 590       | 90     | 3D-R_02 | 388.41      | 390       |
| 43     | 3D-R_02 | 459.061     | 460       | 91     | 3D-R_02 | 380.511     | 380       |
| 44     | 3D-R_02 | 370.106     | 370       | 92     | 3D-R_02 | 328.364     | 330       |
| 45     | 3D-R_02 | 414.742     | 410       | 93     | 3D-R_02 | 338.623     | 340       |
| 46     | 3D-R_02 | 295.289     | 300       | 94     | 3D-R_02 | 639.145     | 640       |
| 47     | 3D-R_02 | 595.531     | 600       | 95     | 3D-R_02 | 358.676     | 360       |
| 48     | 3D-R_02 | 378.191     | 380       | 96     | 3D-R_02 | 321.342     | 320       |

| S. No. | Label   | Length (nm) | Round off | S. No. | Label   | Length (nm) | Round off |
|--------|---------|-------------|-----------|--------|---------|-------------|-----------|
| 97     | 3D-R_02 | 409.78      | 410       | 145    | 3D-R_02 | 127.269     | 130       |
| 98     | 3D-R_02 | 418.016     | 420       | 146    | 3D-R_02 | 628.348     | 630       |
| 99     | 3D-R_02 | 560.731     | 560       | 147    | 3D-R_02 | 447.575     | 450       |
| 100    | 3D-R_02 | 416.263     | 420       | 148    | 3D-R_02 | 692.182     | 690       |
| 101    | 3D-R_02 | 362.97      | 360       | 149    | 3D-R_02 | 390.321     | 390       |
| 102    | 3D-R_02 | 413.304     | 410       | 150    | 3D-R_02 | 403.93      | 400       |
| 103    | 3D-R_02 | 419.112     | 420       | 151    | 3D-R_02 | 329.72      | 330       |
| 104    | 3D-R_02 | 416.977     | 420       | 152    | 3D-R_02 | 373.972     | 370       |
| 105    | 3D-R_02 | 254.72      | 250       | 153    | 3D-R_02 | 442.226     | 440       |
| 106    | 3D-R_02 | 250.598     | 250       | 154    | 3D-R_02 | 405.798     | 410       |
| 107    | 3D-R_02 | 285.035     | 290       | 155    | 3D-R_02 | 414.203     | 410       |
| 108    | 3D-R_02 | 360.331     | 360       | 156    | 3D-R_02 | 404.084     | 400       |
| 109    | 3D-R_02 | 150.121     | 150       | 157    | 3D-R_02 | 315.11      | 320       |
| 110    | 3D-R_02 | 179.252     | 180       | 158    | 3D-R_02 | 392.221     | 390       |
| 111    | 3D-R_02 | 371.043     | 370       | 159    | 3D-R_02 | 407.505     | 410       |
| 112    | 3D-R_02 | 435.503     | 440       | 160    | 3D-R_02 | 404.911     | 400       |
| 113    | 3D-R_02 | 388.506     | 390       | 161    | 3D-R_02 | 453.518     | 450       |
| 114    | 3D-R_02 | 362.492     | 360       | 162    | 3D-R_02 | 368.932     | 370       |
| 115    | 3D-R_02 | 399.114     | 400       | 163    | 3D-R_02 | 399.114     | 400       |
| 116    | 3D-R_02 | 388.538     | 390       | 164    | 3D-R_02 | 401.344     | 400       |
| 117    | 3D-R_02 | 391.557     | 390       | 165    | 3D-R_02 | 351.414     | 350       |
| 118    | 3D-R_02 | 302.874     | 300       | 166    | 3D-R_02 | 431.615     | 430       |
| 119    | 3D-R_02 | 412.554     | 410       | 167    | 3D-R_02 | 412.554     | 410       |
| 120    | 3D-R_02 | 388.666     | 390       | 168    | 3D-R_02 | 333.31      | 330       |
| 121    | 3D-R_02 | 450.254     | 450       | 169    | 3D-R_02 | 354.399     | 350       |
| 122    | 3D-R_02 | 418.283     | 420       | 170    | 3D-R_02 | 448.267     | 450       |
| 123    | 3D-R_02 | 300.779     | 300       | 171    | 3D-R_02 | 341.974     | 340       |
| 124    | 3D-R_02 | 639.281     | 640       | 172    | 3D-R_02 | 662.908     | 660       |
| 125    | 3D-R_02 | 573.215     | 570       | 173    | 3D-R_02 | 359.504     | 360       |
| 126    | 3D-R_02 | 395.495     | 400       | 174    | 3D-R_02 | 559.912     | 560       |
| 127    | 3D-R_02 | 309.353     | 310       | 175    | 3D-R_02 | 641.314     | 640       |
| 128    | 3D-R_02 | 257.045     | 260       | 176    | 3D-R_02 | 383.399     | 380       |
| 129    | 3D-R_02 | 379.891     | 380       | 177    | 3D-R_02 | 372.077     | 370       |
| 130    | 3D-R_02 | 322.459     | 320       | 178    | 3D-R_02 | 422.764     | 420       |
| 131    | 3D-R_02 | 340.339     | 340       | 179    | 3D-R_02 | 420.176     | 420       |
| 132    | 3D-R_02 | 421.236     | 420       | 180    | 3D-R_02 | 371.711     | 370       |
| 133    | 3D-R_02 | 456.624     | 460       | 181    | 3D-R_02 | 406.347     | 410       |
| 134    | 3D-R_02 | 358.572     | 360       | 182    | 3D-R_02 | 377.009     | 380       |
| 135    | 3D-R_02 | 410.022     | 410       | 183    | 3D-R_02 | 347.726     | 350       |
| 136    | 3D-R_02 | 348.011     | 350       | 184    | 3D-R_02 | 608.198     | 610       |
| 137    | 3D-R_02 | 427.546     | 430       | 185    | 3D-R_02 | 406.469     | 410       |
| 138    | 3D-R_02 | 438.679     | 440       | 186    | 3D-R_02 | 304.099     | 300       |
| 139    | 3D-R_02 | 424.403     | 420       | 187    | 3D-R_02 | 321.342     | 320       |
| 140    | 3D-R_02 | 347.833     | 350       | 188    | 3D-R_02 | 336.603     | 340       |
| 141    | 3D-R_02 | 392.221     | 390       | 189    | 3D-R_02 | 424.403     | 420       |
| 142    | 3D-R_02 | 405.278     | 410       | 190    | 3D-R_02 | 423.028     | 420       |
| 143    | 3D-R_02 | 381.454     | 380       | 191    | 3D-R_02 | 320.725     | 320       |
| 144    | 3D-R_02 | 435.56      | 440       | 192    | 3D-R_02 | 418.728     | 420       |

| S. No. | Label      | Length (nm) | Round off | S. No.                                                                                              | Label      | Length (nm) | Round off |
|--------|------------|-------------|-----------|-----------------------------------------------------------------------------------------------------|------------|-------------|-----------|
| 193    | 3D-R_02    | 407.961     | 410       | 204                                                                                                 | Grid.21622 | 224.608     | 220       |
| 194    | 3D-R_02    | 382.914     | 380       | 205                                                                                                 | Grid.21622 | 665.931     | 670       |
| 195    | 3D-R_02    | 312.542     | 310       | 206                                                                                                 | Grid.21622 | 397.215     | 400       |
| 196    | 3D-R_02    | 429.772     | 430       | 207                                                                                                 | Grid.21622 | 355.347     | 360       |
| 197    | 3D-R_02    | 439.977     | 440       | 208                                                                                                 | Grid.21622 | 599.505     | 600       |
| 198    | 3D-R_02    | 436.81      | 440       | 209                                                                                                 | Grid.21622 | 676.075     | 680       |
| 199    | 3D-R_02    | 454.447     | 450       | Round-off has been done in Microsoft Excel using the formula =MROUND(XX,10), in the multiple of 10. |            |             |           |
| 200    | 3D-R_02    | 443.15      | 440       |                                                                                                     |            |             |           |
| 201    | Grid.21622 | 240.589     | 240       |                                                                                                     |            |             |           |
| 202    | Grid.21622 | 203.864     | 200       |                                                                                                     |            |             |           |
| 203    | Grid.21622 | 205.122     | 210       |                                                                                                     |            |             |           |

**Table ST1:** Representation of the diameter size of spheres in the tabular form. Measured in Image J software and calculated using Microsoft excel 16.0.

| Round off size(nm) | Freq. | Round off size(nm) | Freq. | Round off size(nm) | Freq. | Round off size(nm)                             | Freq. |
|--------------------|-------|--------------------|-------|--------------------|-------|------------------------------------------------|-------|
| 50                 | 0     | 240                | 1     | 430                | 7     | 620                                            | 0     |
| 60                 | 0     | 250                | 2     | 440                | 7     | 630                                            | 1     |
| 70                 | 0     | 260                | 1     | 450                | 6     | 640                                            | 4     |
| 80                 | 1     | 270                | 0     | 460                | 3     | 650                                            | 0     |
| 90                 | 0     | 280                | 0     | 470                | 0     | 660                                            | 1     |
| 100                | 2     | 290                | 1     | 480                | 0     | 670                                            | 1     |
| 110                | 2     | 300                | 5     | 490                | 0     | 680                                            | 3     |
| 120                | 0     | 310                | 3     | 500                | 1     | 690                                            | 1     |
| 130                | 3     | 320                | 5     | 510                | 1     | 700                                            | 0     |
| 140                | 0     | 330                | 8     | 520                | 0     | Mean = <b>387.65 nm</b><br>(without round-off) |       |
| 150                | 2     | 340                | 5     | 530                | 0     |                                                |       |
| 160                | 1     | 350                | 9     | 540                | 0     | Mean = <b>387.70 nm</b><br>(with round-off)    |       |
| 170                | 0     | 360                | 11    | 550                | 1     |                                                |       |
| 180                | 1     | 370                | 17    | 560                | 2     | <b>72.25 %</b> of spheres have 320-450 nm size |       |
| 190                | 1     | 380                | 16    | 570                | 1     |                                                |       |
| 200                | 3     | 390                | 17    | 580                | 0     |                                                |       |
| 210                | 1     | 400                | 12    | 590                | 3     |                                                |       |
| 220                | 1     | 410                | 17    | 600                | 2     |                                                |       |
| 230                | 0     | 420                | 14    | 610                | 2     |                                                |       |

**Table ST2 :** Representation of rounded-off size and frequency in the tabular form. Refined using Microsoft Excel 16.0



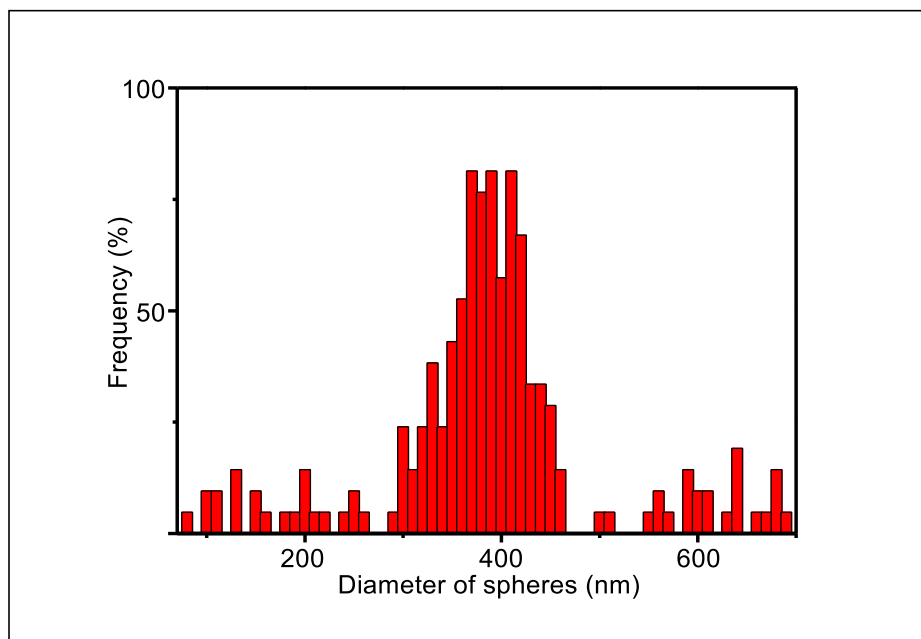

**Figure S12:** Graphical representation of measured diameter of spheres using Image J software showing average diameter of 387.7 nm

---

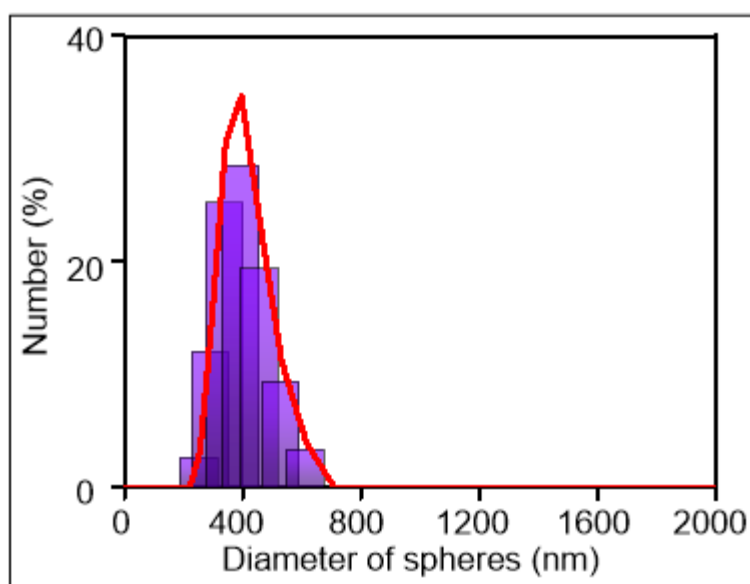

**Figure S13 :** DLS spectra for the measured diameter of spheres. The average size of spheres is 398.5 nm, whereas 72.80 % of spheres fall in 340 - 460 nm range

---

## Section SM-V: Synthesis and characterization of Pd@PKPOP

### Synthesis of Pd@PKPOP

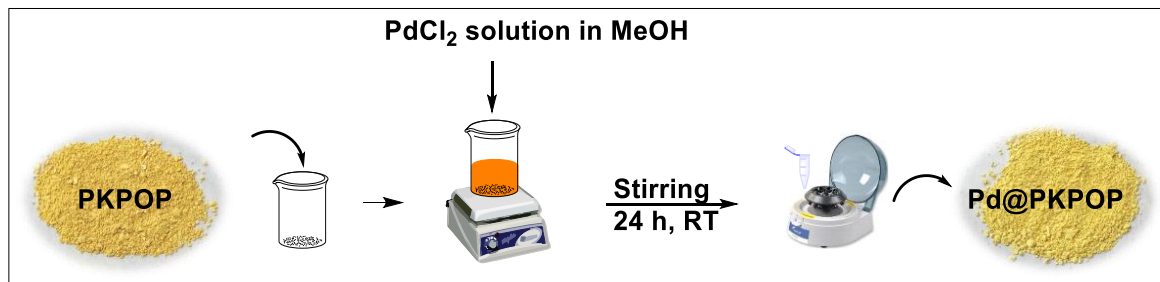

**Figure S14:** Schematic post-metalation of PKPOP to obtain Pd@PKPOP

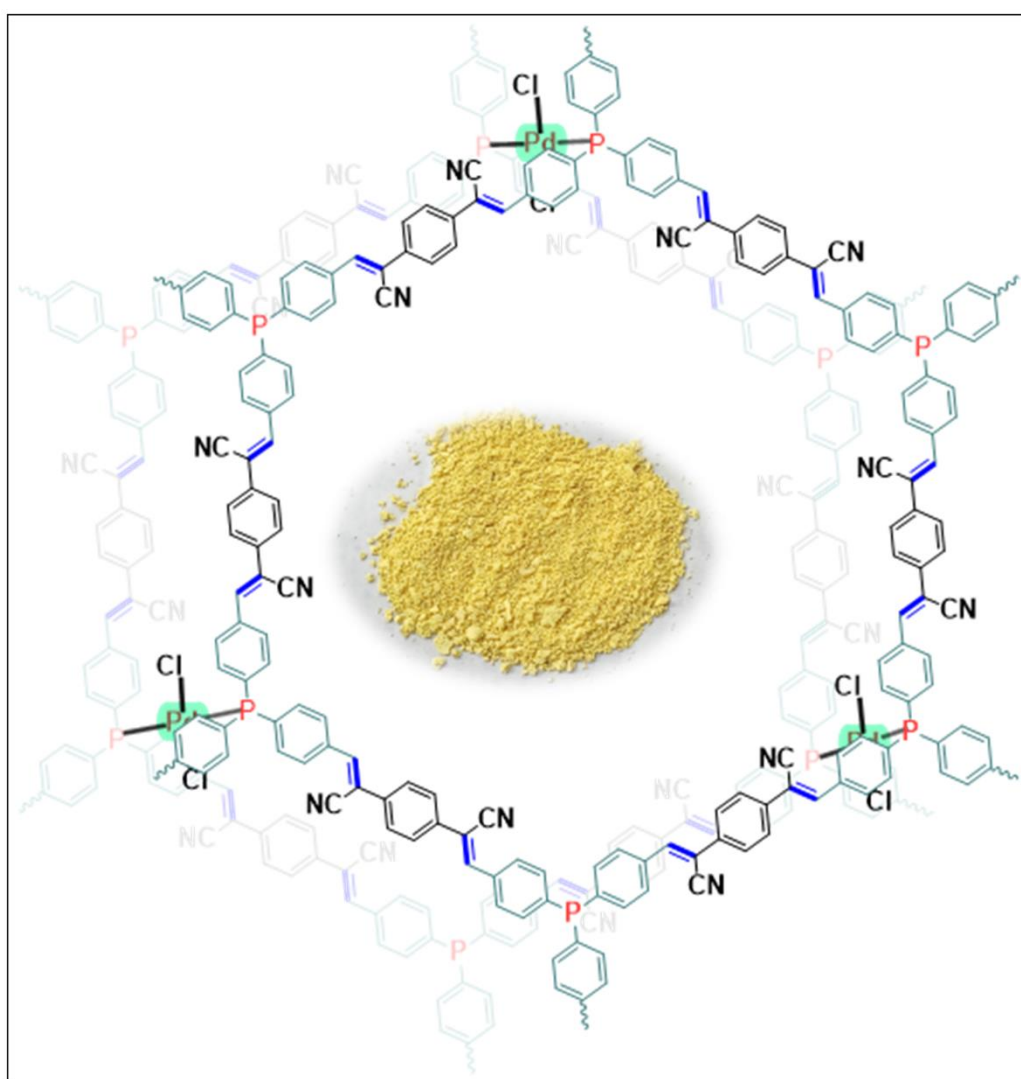

**Figure S15:** Plausible structure of Pd@PKPOP

Methanol (5 mL) was taken in a clean reaction tube with a magnetic stir bar. 94 mg PKPOP was suspended into it and stirred for 2 h at RT. A pre-formed solution of 6.0 mg PdCl<sub>2</sub> in 5.0 mL methanol was mixed with the suspension and allowed to stir for 24 h at RT. Further, it was

centrifuged and washed with fresh methanol five times to ensure the removal of extra unsupported PdCl<sub>2</sub>. It was dried under vacuum at 120 °C for 12 h to obtain **Pd@PKPOP**. A similar procedure has been applied for the metalation of **PKPOP** with other variations of PdCl<sub>2</sub> loading like 2 wt%, 4 wt%, and 8 wt%.

#### Characterization of Pd@PKPOP

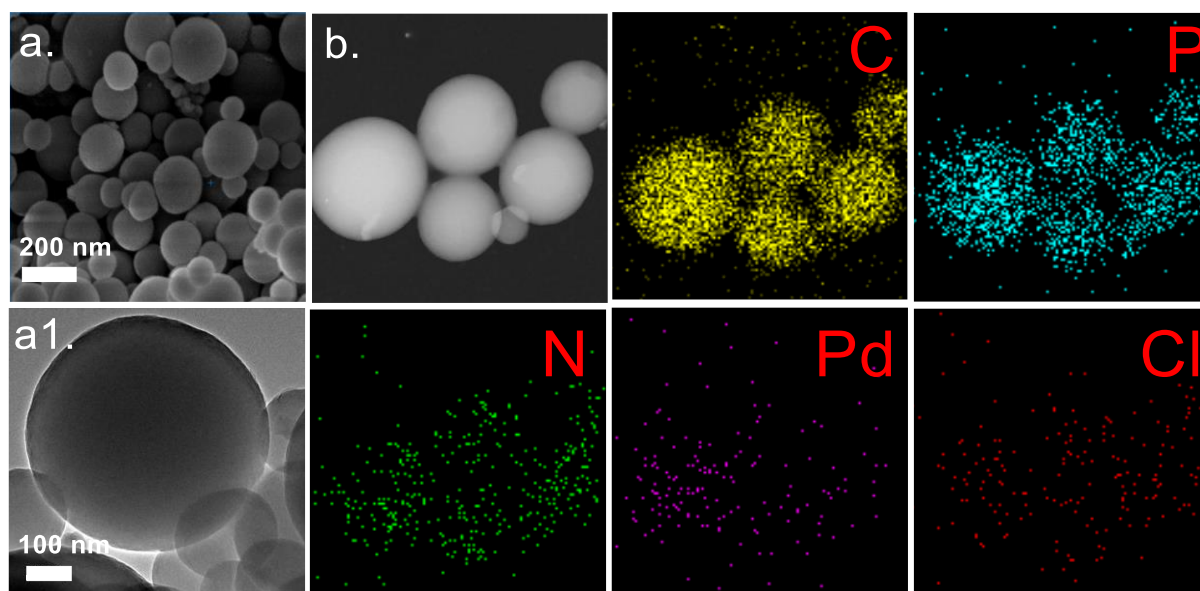

**Figure S16:** (a) FESEM image of **Pd@PKPOP**; (a1) TEM image of **Pd@PKPOP**; (b) EDAX shows the presence of C, P, N, Pd, and Cl through elemental mapping of **Pd@PKPOP**

#### Quantifying the Amount of Pd in different catalysts

2 mg of the catalyst has been digested in 2 mL aqua regia solution for 30 h. It was diluted with 8 mL Milli-Q water. 1 mL aliquot was again taken and diluted with 2% concentrated HNO<sub>3</sub> (9 mL). 2 ml of the final solution was filtered with 0.2 μm syringe filter, and measurement was carried out on ICP-OES. Commercially available Pd (1000 ppm Pd in 10% HCl) solution has been used as standard. After calculation, we got the following result.

| Catalysts | Expt. Found Pd (wt %) | Theoretically PdCl <sub>2</sub> taken (wt %) |
|-----------|-----------------------|----------------------------------------------|
| Pd@PKPOP  | 1.12                  | 2                                            |
| Pd@PKPOP  | 1.89                  | 4                                            |
| Pd@PKPOP  | 2.70                  | 6                                            |
| Pd@PKPOP  | 3.52                  | 8                                            |

**Table ST3:** Quantity of Pd in different catalysts quantified by ICP-OES. Wt% was calculated with respect to **PKPOP**. So, 2.0 mg 6 wt% **Pd@PKPOP** contains 0.054 mg ( $0.5074 \times 10^{-3}$  mmol) Pd

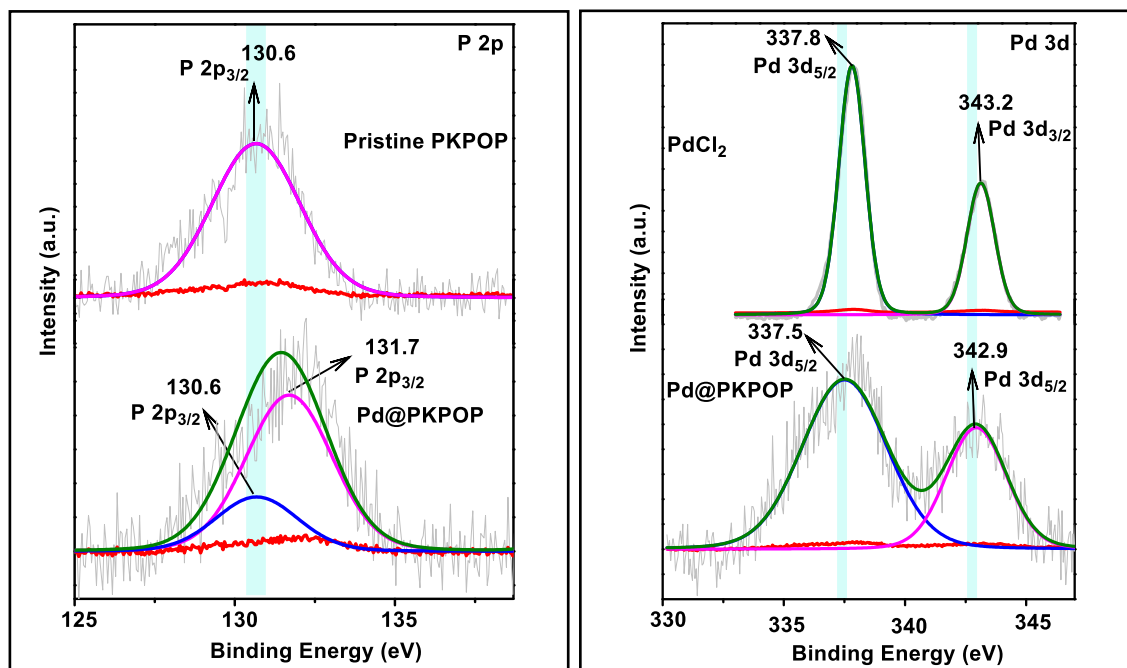

**Figure S17:** XPS spectra for **PKPOP** and **Pd@PKPOP**. (a) P in pristine **PKPOP** has 130.6 eV for P 2p<sub>3/2</sub> while 131.7 eV for P 2p<sub>3/2</sub> after metalation. Some unmetalated P has been left out in the **Pd@PKPOP**. (b) In PdCl<sub>2</sub>, Pd 3d<sub>5/2</sub> and Pd 3d<sub>3/2</sub> have 337.8 eV and 343.2 eV, respectively. Interaction with P has been reflected by shifting the binding energy towards the lower side for Pd(II). **Pd@PKPOP** has Pd 3d<sub>5/2</sub>, and Pd 3d<sub>3/2</sub> has 337.5 eV and 342.9 eV, respectively

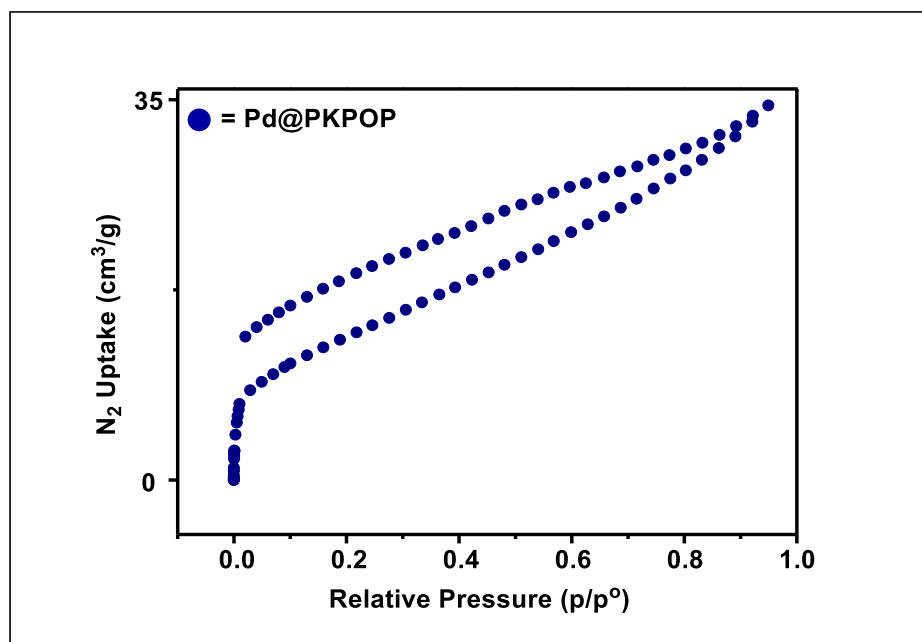

**Figure S18:** BET isotherm of **Pd@PKPOP**. Steep rise of curve at low pressure of Type II curve shows the filling of micropores (similar to **PKPOP**) and formation of monolayers afterwards. BET surface area measured was 49 m<sup>2</sup>/g

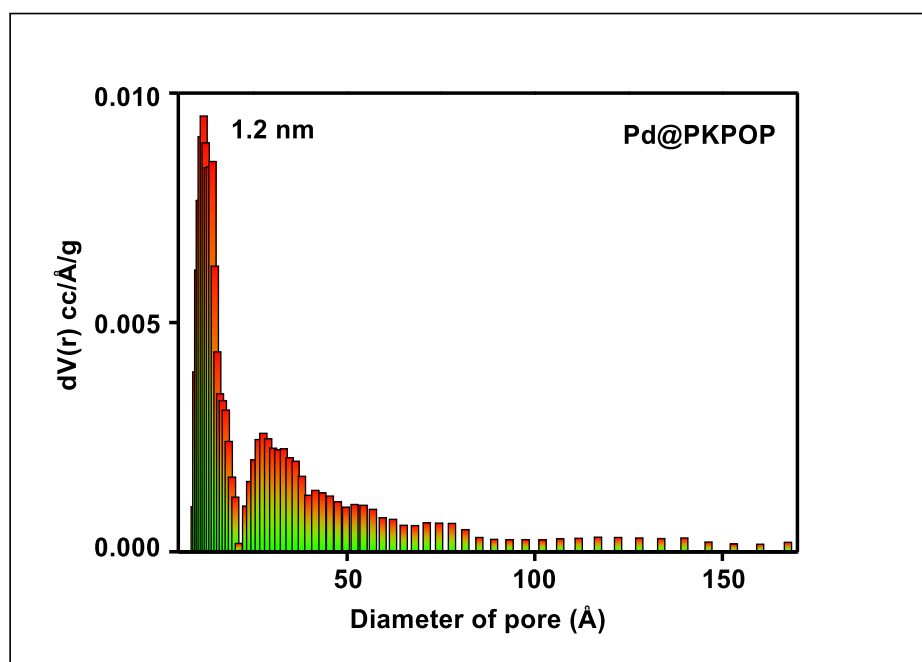

**Figure S19:** Pore size distribution spectra of **Pd@PKPOP** shows micropores having average diameter of 1.2 nm

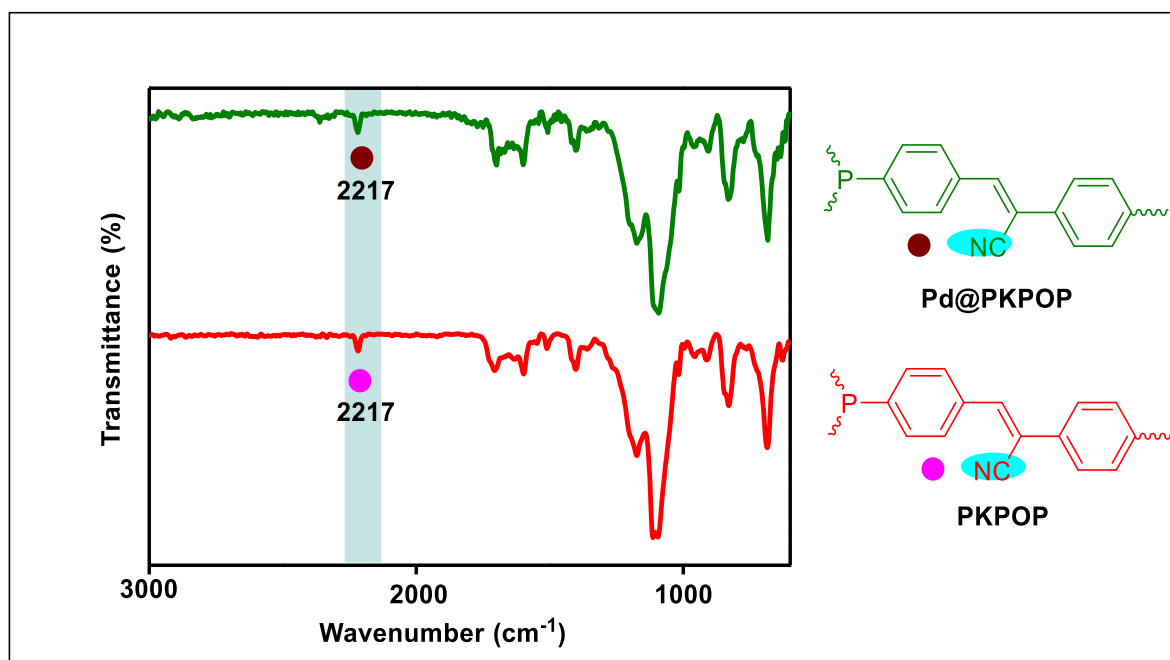

**Figure S20:** FTIR analysis of **Pd@PKPOP** showing unaltered olefinic C-N stretching frequency

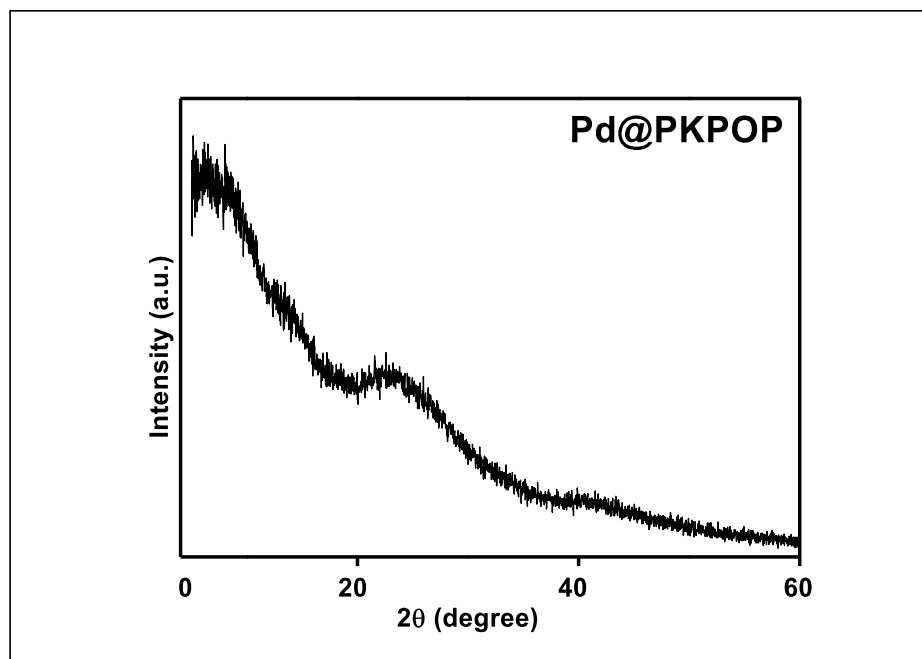

**Figure S21:** PXRD analysis of Pd@PKPOP having broad peak between 20° to 40° showing similar stacking as PKPOP

### **Section SM-VI: Synthesis of homogeneous metal complexes and their characterizations**

#### **Synthesis of Bis-((Z)-2,3-diphenylacrylonitrile)Palladium dichloride, PdCl<sub>2</sub>(BB5)<sub>2</sub>**

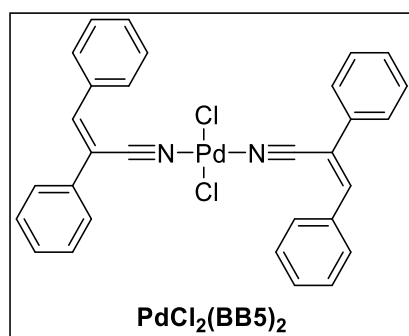

*Method 1:-* A 16 mL reaction tube was charged with (Z)-2,3-diphenylacrylonitrile (**BB5**) (0.2 mmol, 41.0 mg), methanol (3.0 mL) and PdCl<sub>2</sub> (0.1 mmol, 17.7 mg). The whole solution was allowed to stir for 12 h at room temperature. A dull green-colored precipitate was filtered out and washed thoroughly with methanol. It was vacuum dried to get 82% yield.

*Method 2:-* A 16 mL reaction tube was charged with (Z)-2,3-diphenylacrylonitrile (**BB5**) (0.2 mmol, 41.0 mg), chloroform (3.0 mL) and PdCl<sub>2</sub> (0.1 mmol, 17.7 mg). The whole solution was allowed to stir for 12 h at room temperature. A yellow-colored solution formed, which on concentration, gave yellow color powder. Further, it was washed with methanol and vacuum dried to get 77% yield with its retained yellow color.

<sup>1</sup>H NMR (500 MHz, CDCl<sub>3</sub>) δ 7.83 – 7.80 (m, 4H), 7.67 – 7.63 (m, 2H), 7.63 – 7.58 (m, 2H), 7.58 – 7.56 (m, 2H), 7.49 – 7.47 (m, 2H), 7.47 – 7.43 (m, 2H), 7.42 – 7.40 (m, 2H), 7.40 – 7.38 (m, 2H), 7.38 – 7.36 (m, 2H), 7.35 – 7.31 (m, 2H). <sup>13</sup>C NMR (126 MHz, CDCl<sub>3</sub>) δ 148.1, 142.4, 134.6, 133.9, 132.8, 132.6, 132.2, 130.7, 130.1, 129.9, 129.59, 129.56, 129.42, 129.36,

129.2, 129.1, 126.2, 126.1, 126.0, 122.2, 118.1, 111.9, 108.8. mp = 162-164 °C. **<sup>1</sup>H NMR (500 MHz, DMSO-*d*<sub>6</sub>)** δ 8.06 (s, 2H), 7.95 (d, *J* = 7.5 Hz, 4H), 7.79 (s, 4H), 7.57 – 7.45 (m, 12H). **<sup>13</sup>C NMR (126 MHz, DMSO-*d*<sub>6</sub>)** δ 143.5, 134.3, 134.2, 131.1, 129.8, 129.7, 129.6, 129.4, 126.3, 118.4, 110.9. **IR(ATR/cm<sup>-1</sup>)** 3059.6, 3022.3, 2277.4, 1590.3, 1566.3, 1492.9, 1447.1, 1353.3, 1314.8, 1253.4, 1241.4, 1206.5, 1188.4, 1180.0, 1155.9, 1106.6, 1080.1, 1029.6, 1006.7, 986.3, 934.5, 899.6, 843.1, 827.4, 797.3, 761.2, 749.2, 689.0, 621.7.

#### Synthesis of PdCl<sub>2</sub>(PKMONO)<sub>2</sub>

A 16 mL reaction tube was charged with **PKMONO** (0.05 mmol, 32.2 mg), chloroform (2.0 mL), and PdCl<sub>2</sub> (0.025 mmol, 4.4 mg). The whole solution was allowed to stir for 24 h at room temperature. A yellow-colored solution was concentrated to get a solid product, which was washed thoroughly with methanol. Further, it was vacuum dried to get 85% yield with retained yellow color.

**<sup>1</sup>H NMR (500 MHz, CDCl<sub>3</sub>)** δ 7.92 (d, *J* = 8.1 Hz, 12H), 7.82 – 7.79 (m, 12H), 7.62 (d, *J* = 7.9 Hz, 12H), 7.49 (s, 6H), 7.42 – 7.33 (m, 18H). **<sup>13</sup>C NMR (126 MHz, CDCl<sub>3</sub>)** δ 140.8, 136.3, 135.6, 134.3, 131.0, 129.8, 129.3, 129.2, 126.4, 117.8, 114.0. **<sup>31</sup>P NMR (203 MHz, CDCl<sub>3</sub>)** δ 23.80. **<sup>1</sup>H NMR (500 MHz, DMSO-*d*<sub>6</sub>)** δ 8.12 (s, 6H), 8.11 – 8.04 (m, 12H), 7.95 – 7.87 (m, 12H), 7.81 – 7.77 (m, 12H), 7.54 – 7.50 (m, 12H), 7.49 – 7.42 (m, 6H). **<sup>13</sup>C NMR (126 MHz, DMSO-*d*<sub>6</sub>)** δ 141.6, 136.2, 135.0, 133.5, 132.1, 129.7, 129.3, 129.0, 126.0, 117.6, 112.3. **<sup>31</sup>P NMR (203 MHz, DMSO-*d*<sub>6</sub>)** δ 23.79. **IR(ATR/cm<sup>-1</sup>)** 3059.3, 3030.5, 2213.6, 1593.2, 1544.1, 1494.9, 1445.8, 1396.6, 1354.2, 1313.6, 1261.0, 1189.8, 1094.9, 1018.6, 903.4, 811.9, 759.3, 684.7, 638.9, 625.4, 611.9.

#### Synthesis of (PdCl<sub>2</sub>)<sub>4</sub>(PKMONO)<sub>2</sub>

*Method 1:-* A 16 mL reaction tube was charged with **PKMONO** (0.1 mmol, 64.3 mg), methanol (3.0 mL), and PdCl<sub>2</sub> (0.2 mmol, 35.4 mg). The whole solution was allowed to stir for 24 h at room temperature. A light green colored precipitate was filtered out and washed thoroughly with methanol. It was vacuum dried to get 91% yield.

*Method 2:-* A 16 mL reaction tube was charged with **PKMONO** (0.1 mmol, 64.3 mg), chloroform (3.0 mL), and PdCl<sub>2</sub> (0.2 mmol, 35.4 mg). The whole solution was allowed to stir for 24 h at room temperature. A yellow-colored precipitate was filtered out and thoroughly washed with chloroform and methanol. Further, it was vacuum dried to get 84% yield with retained yellow color.

**<sup>1</sup>H NMR (500 MHz, CDCl<sub>3</sub>)** δ 7.96 – 7.87 (m, 12H), 7.82 – 7.72 (m, 12H), 7.67 – 7.59 (m, 12H), 7.52 – 7.47 (m, 6H), 7.41 – 7.36 (m, 12H), 7.33 – 7.28 (m, 6H). **<sup>13</sup>C NMR (126 MHz, CDCl<sub>3</sub>)** δ 140.8, 135.6, 135.5, 132.7, 129.5, 129.4, 129.34, 129.32, 126.4, 117.8, 114.0. **<sup>31</sup>P NMR (203 MHz, CDCl<sub>3</sub>)** δ 22.99. **<sup>1</sup>H NMR (500 MHz, DMSO-*d*<sub>6</sub>)** δ 8.12 (s, 6H), 8.06 (dd, *J* = 8.5, 2.3 Hz, 12H), 7.90 (dd, *J* = 11.9, 8.4 Hz, 12H), 7.80 (d, *J* = 7.9 Hz, 12H), 7.54 (t, *J* = 7.6 Hz, 12H), 7.48 (t, *J* = 7.2 Hz, 6H). **<sup>13</sup>C NMR (126 MHz, DMSO-*d*<sub>6</sub>)** δ 141.5, 136.5, 135.3 (d, *J* = 10.9 Hz), 133.5, 130.6, 129.8, 129.3, 128.8 (d, *J* = 12.3 Hz), 126.0, 117.5, 112.6. **<sup>31</sup>P NMR (203 MHz, DMSO-*d*<sub>6</sub>)** δ 30.68. **IR(ATR/cm<sup>-1</sup>)** 3057.6, 3032.2, 2213.5, 1594.9, 1545.8, 1496.6, 1445.8, 1400.0, 1355.9, 1250.8, 1193.2, 1101.7, 1008.5, 901.7, 815.3, 755.9, 686.4, 637.3

### Synthesis of Pd(0)(PKMONO)<sub>4</sub>

A 16 mL reaction tube was charged with **PKMONO** (0.1 mmol, 64.3 mg), anhydrous DMSO (0.3 mL), and Pd(OAc)<sub>2</sub> (0.025 mmol, 5.6 mg). It was capped under Ar and continuously stirred at 150 °C. After 2 h, L-ascorbic acid (0.1 mmol, 17.6 mg) in 50 uL anhydrous DMSO was poured through a syringe under Ar, keeping continuous stirring at 150 °C. It was allowed to stir for another 15 min and kept to attain room temperature. Unlike Pd(0)(PPh<sub>3</sub>)<sub>4</sub>, it did not form a precipitate. The yield was not quantified. The solution was found to be dark yellowish-brown. <sup>1</sup>H NMR (500 MHz, DMSO-*d*<sub>6</sub>) δ 8.09 – 8.05 (m, 36H), 7.86 – 7.82 (m, 24H), 7.77 – 7.74 (m, 24H), 7.52 – 7.48 (m, 24H), 7.46 – 7.41 (m, 12H). <sup>13</sup>C NMR (126 MHz, DMSO-*d*<sub>6</sub>) δ 141.7, 137.7 (d, *J* = 2.8 Hz), 133.5, 132.34 (d, *J* = 10.1 Hz), 130.1, 129.6, 129.4, 129.3, 126.3, 117.7, 113.3. <sup>31</sup>P NMR (202 MHz, DMSO-*d*<sub>6</sub>) δ 25.05. IR(ATR/cm<sup>-1</sup> in DMSO-*d*<sub>6</sub> solvent) 2250.8, 1054.2, 1022.0, 1006.8, 991.5, 825.4, 757.6.

#### NMR analysis of [Pd(0)(PKMONO)<sub>n</sub>] and [Pd(0)(OAc)(PKMONO)<sub>n</sub>]

<sup>1</sup>H NMR (500 MHz, DMSO-*d*<sub>6</sub>) δ 7.89 (s, 12H), 7.80 (d, *J* = 8.5 Hz, 24H), 7.64 – 7.58 (m, 24H), 7.40 – 7.32 (m, 60H). <sup>13</sup>C NMR (126 MHz, DMSO-*d*<sub>6</sub>) δ 142.1, 134.1, 133.8, 133.3, 129.7, 129.6, 128.3, 127.9, 126.0, 116.9, 111.4. <sup>31</sup>P NMR (202 MHz, DMSO-*d*<sub>6</sub>) δ 8.63.

#### Attempted synthesis of Tetrakis-((Z)-2,3-diphenylacrylonitrile)Palladium(0)

*Method 1*:- A 16 mL reaction tube was charged with **BB5** (0.1 mmol, 20.5 mg), anhydrous DMSO (0.3 mL), and PdCl<sub>2</sub> (0.025 mmol, 4.4 mg). It was capped under Ar and continuously stirred at 150 °C. After 2 h, L-ascorbic acid (0.1 mmol, 17.6 mg) in 50 uL anhydrous DMSO was poured through a syringe under Ar, continuously stirring at 150 °C. It was allowed to stir for another 15 min and kept to attain room temperature. A transparent clear solution was observed, and along with it, some settled black particles were at the bottom of the reaction tube. It seemed **BB5** could not stabilize Pd(0) through this method.

*Method 2*:- A 16 mL reaction tube was charged with **BB5** (0.1 mmol, 20.5 mg), methanol (0.5 mL), and Na<sub>2</sub>OAc (0.2 mmol, 16.4 mg) under Ar. It was capped and allowed to stir at 50 °C for 1 h. Further, freshly prepared methanolic solution of Na<sub>2</sub>PdCl<sub>4</sub> (0.025 mmol, 7.3 mg) was poured slowly using a syringe on continuous stirring condition at 50 °C. It was allowed for another 2 h to stir. Finally, after attaining room temperature, a similar transparent solution with settled black particles at the bottom of the reaction tube, like method 1 was observed. Through this method, also it seemed **BB5** was unable to stabilize Pd(0), resulting in the formation of black Pd nanoparticles.

#### Synthesis of Sodium tetrachloropalladate (Na<sub>2</sub>PdCl<sub>4</sub>)

A 16 mL reaction tube was charged with PdCl<sub>2</sub> (0.1 mmol, 17.7 mg), NaCl (0.25 mmol, 14.6 mg), and anhydrous methanol (2 mL). It was allowed to stir at rt overnight. The dark yellow solution formed was filtered out with a syringe filter and kept aside for use.

#### NMR analysis of different homogeneous metal complexes in DMSO-*d*<sub>6</sub> and CDCl<sub>3</sub> solvent

We have compared the <sup>1</sup>H NMR spectra of **PKMONO**, **PdCl<sub>2</sub>(PKMONO)<sub>2</sub>**, **(PdCl<sub>2</sub>)<sub>4</sub>(PKMONO)<sub>2</sub>** and **Pd(0)(PKMONO)<sub>4</sub>** using DMSO-*d*<sub>6</sub> as NMR solvent (Figure S22). In **PdCl<sub>2</sub>(PKMONO)<sub>2</sub>**, the ortho-protons near to P shifted downfield with splitting (orange ball), showing Pd binding with P. Similar peak patterns can be seen even after using excess Pd in **(PdCl<sub>2</sub>)<sub>4</sub>(PKMONO)<sub>2</sub>** while in case of **Pd(0)(PKMONO)<sub>4</sub>**, spectra shifted



upfield maintaining similar peak positions with respect to each other except overlapping of olefinic proton (blue ball) and ortho-protons of benzylic nitrile (pink ball). Moreover, the other broad peaks (asterisks) hinted the presence of equilibrium between the probable complexes,  $[\text{Pd}(0)(\text{PKMONO})_n]$  and  $[\text{Pd}(0)(\text{OAc})(\text{PKMONO})_n]$ .<sup>3</sup> Concurrently, the  $^1\text{H}$  NMR spectra of **BB5** and  $\text{PdCl}_2(\text{BB5})_2$  displayed exactly the same spectra with exact peak positions in  $\text{DMSO-}d_6$  (Figure S22A). Here, it can be concluded, Pd-P binding took place and same was depicted by  $^1\text{H}$  NMR in  $\text{DMSO-}d_6$  while Pd-olefinic CN binding cannot be depicted as probably Pd-olefinic CN binding affinity might be overcome by  $\text{DMSO-}d_6$ .

Simultaneously, downfield shift of  $\beta$ -olefinic C (blue ball) (Figure S23) in  $^{13}\text{C}$  NMR spectra in  $\text{DMSO-}d_6$ , slightly upfield shift of  $\alpha$ -olefinic C (pink ball) and no shift in nitrile C (cyan ball) of  $\text{PdCl}_2(\text{PKMONO})_2$ , in comparison with **PKMONO** has observed because of purely Pd(II)-P binding. Further slight downfield shift in  $\beta$ -olefinic C (blue ball) of  $(\text{PdCl}_2)_4(\text{PKMONO})_2$  gave hint of interaction between Pd(II) and olefin which can also be sensed via  $^1\text{H}$  NMR in  $\text{DMSO-}d_6$  (Figure S22) as the separation between olefinic proton (blue ball) and ortho-protons of benzyl nitrile (pink ball) increased. Pd(0)-P binding was also well observed via downfield shift of  $\beta$ -olefinic C (blue ball) of  $\text{Pd}(0)(\text{PKMONO})_4$  (Figure S23). Conclusion can be drawn here as Pd(0) as well as Pd(II) were stabilized by P. On the other hand, olefin also helped to stabilize Pd(II).

Similar downfield shift was observed for ortho-protons near to P (orange ball) of  $\text{PdCl}_2(\text{PKMONO})_2$  (fully soluble in  $\text{CDCl}_3$ ) and  $(\text{PdCl}_2)_4(\text{PKMONO})_2$  (slightly soluble in  $\text{CDCl}_3$ ) in  $^1\text{H}$  NMR spectra in  $\text{CDCl}_3$  (Figure S24) with respect to **PKMONO**. But olefinic proton (blue ball) and meta-protons near to P (maroon ball) of  $(\text{PdCl}_2)_4(\text{PKMONO})_2$  splitted much like  $\text{PdCl}_2(\text{BB5})_2$  while corresponding protons of  $\text{PdCl}_2(\text{PKMONO})_2$  remained unsplit. As a conclusion, both P as well as CN could stabilize Pd (II). Concomitantly,  $^{31}\text{P}$  NMR in  $\text{DMSO-}d_6$  has also presented different chemical environment of P in various complexes (Figure S25).

In short, Pd(II) has been stabilized by P, olefin and CN of **PKMONO** (Figure S22, S23 and S24) homogeneously which can be extended to stabilize heterogeneously too.<sup>4</sup> Similarly, Pd(0) has been stabilized by P of **PKMONO** (Figure S22 and S23) as well as olefinic compounds<sup>5</sup> homogeneously which guided to envision that P, olefin and CN stabilized Pd nanoparticles in extended form of **PKMONO** i.e **PKPOP** heterogeneously.<sup>6,7,8</sup>

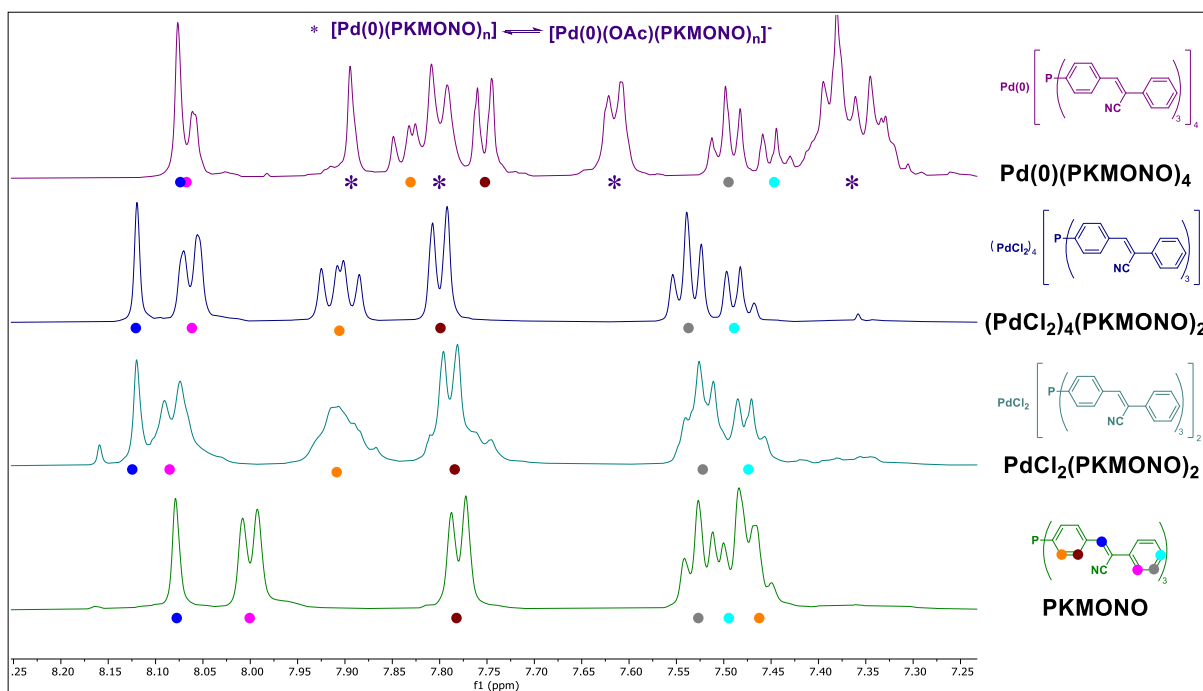

**Figure S22:** <sup>1</sup>H NMR in DMSO-*d*<sub>6</sub>

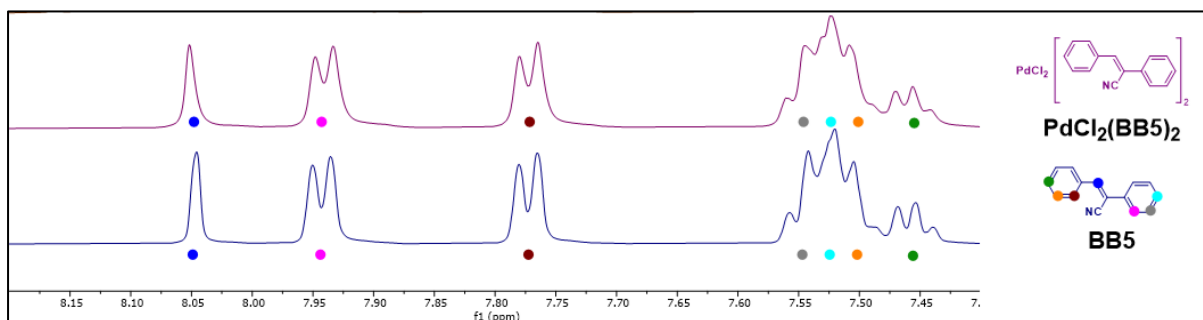

**Figure S22A:** <sup>1</sup>H NMR in DMSO-*d*<sub>6</sub>

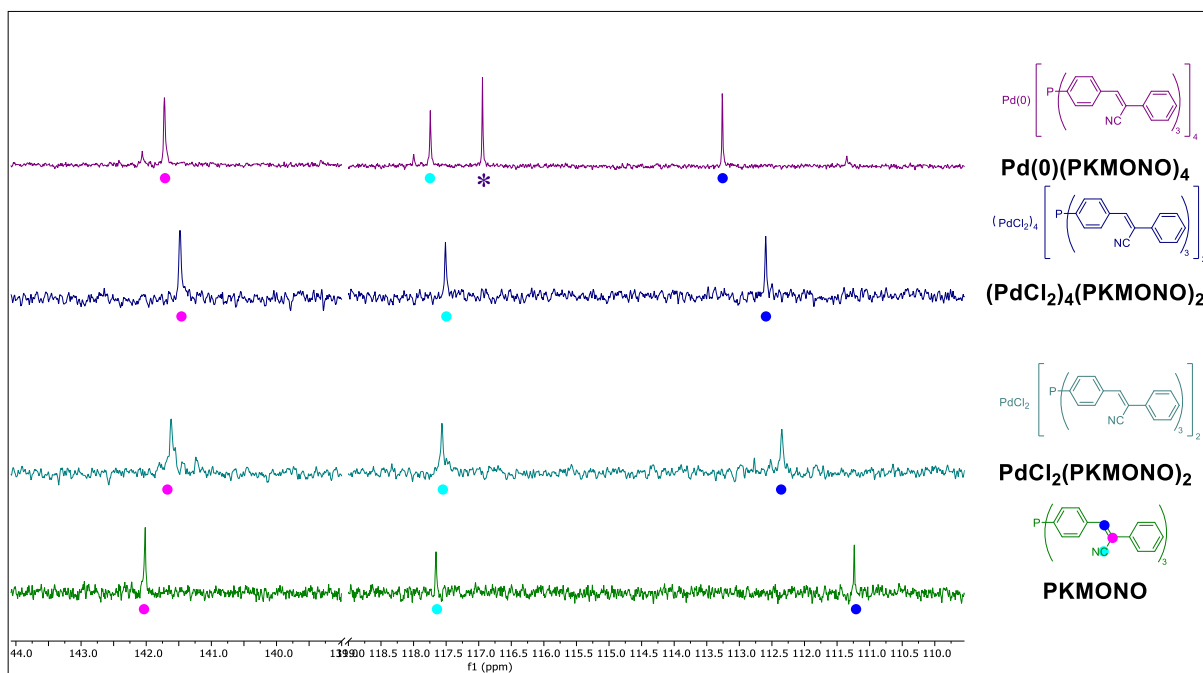

**Figure S23:**  $^{13}\text{C}$  NMR in  $\text{DMSO-}d_6$

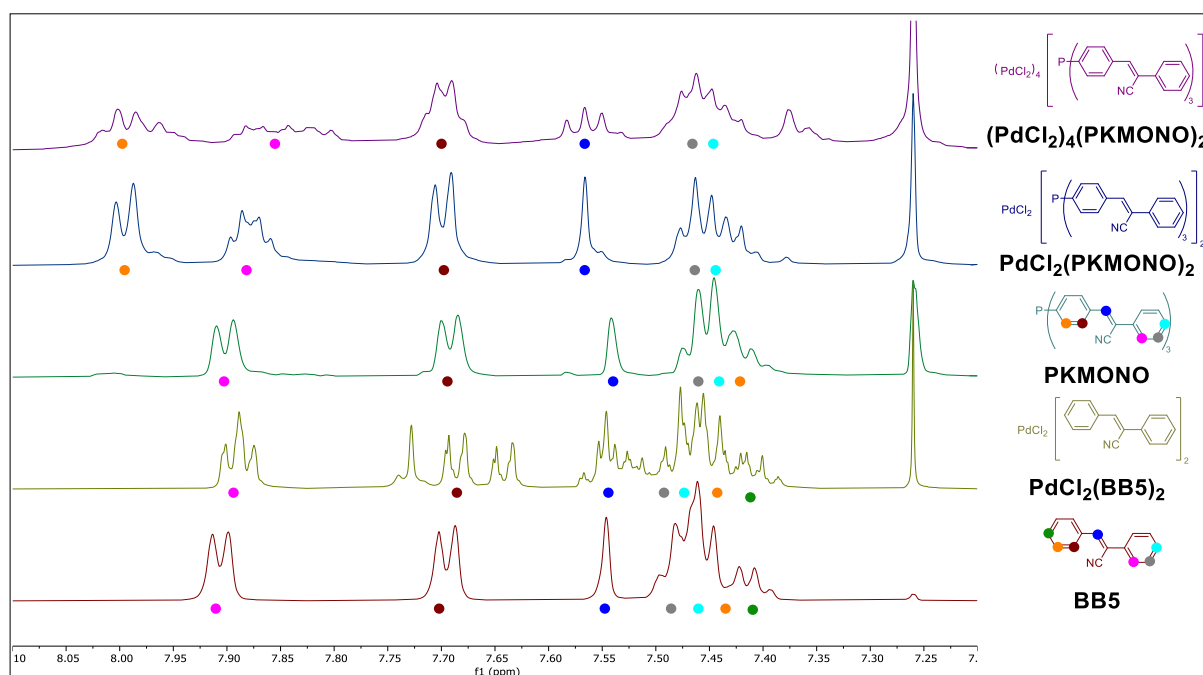

**Figure S24:**  $^1\text{H}$  NMR in  $\text{CDCl}_3$

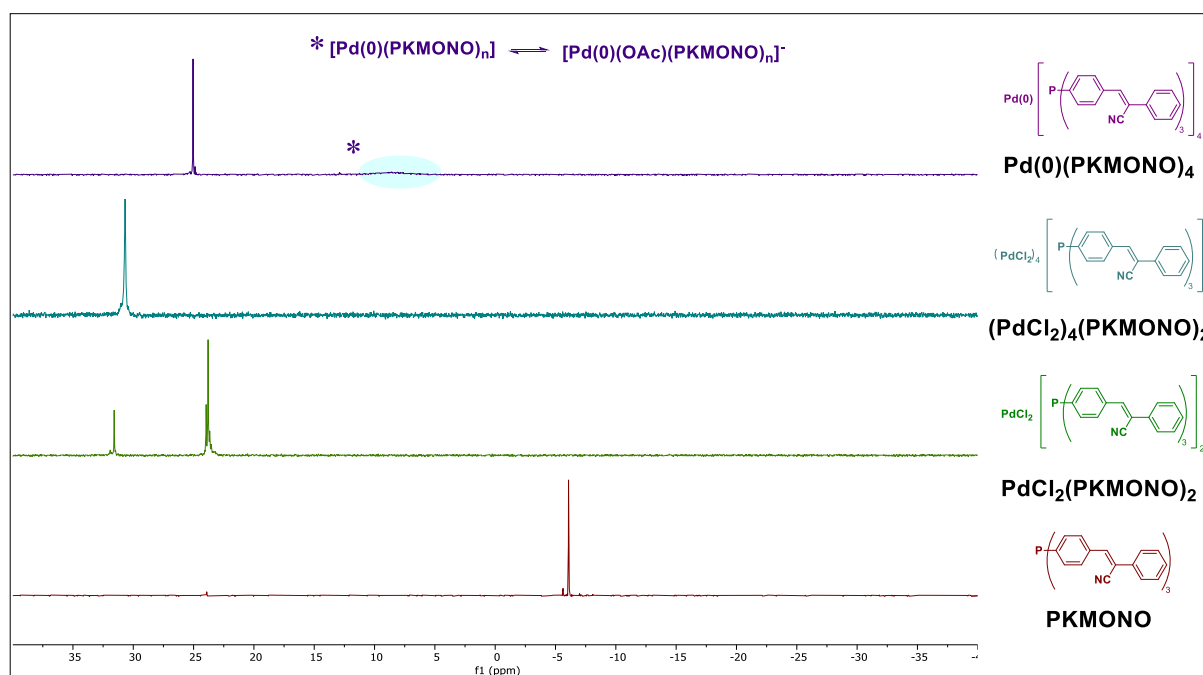

**Figure S25:**  $^{31}\text{P}$  NMR in  $\text{DMSO-}d_6$

**Section SM-VII: Synthetic protocol for the formation of reactants**

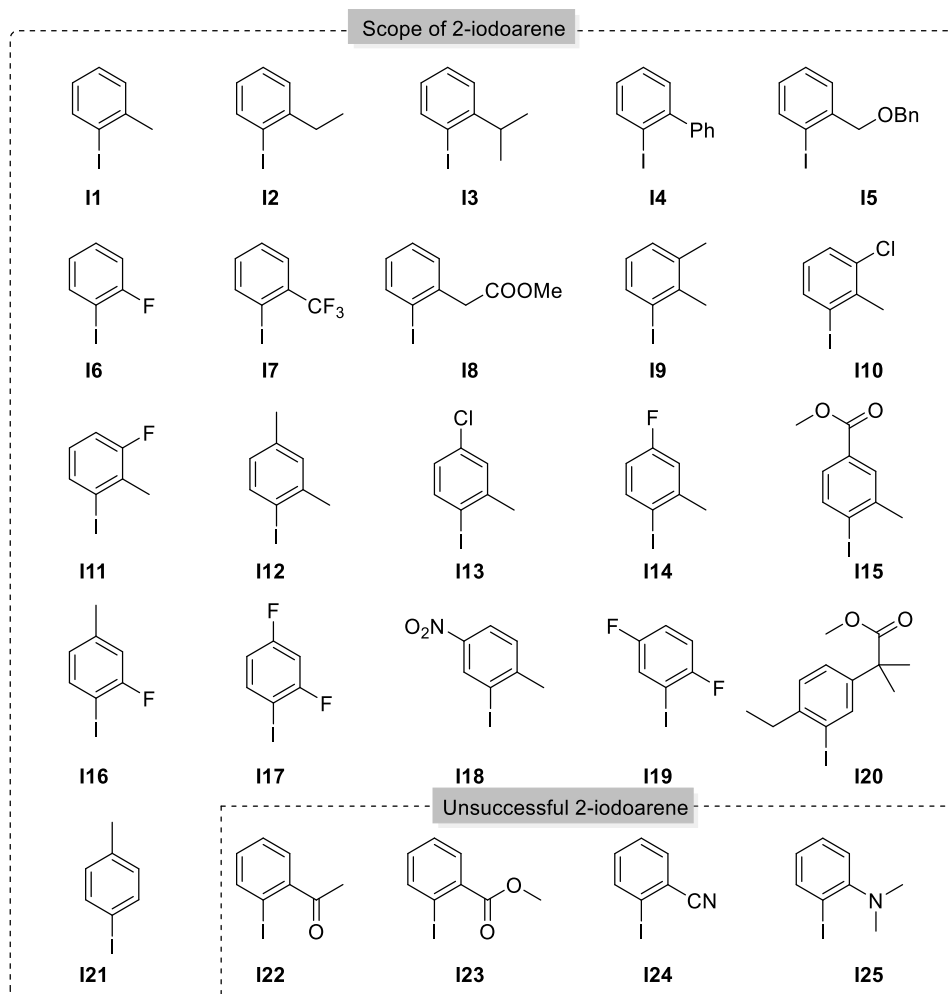

**Figure S26:** Iodoarenes used in this study. Except for **I20**, all are commercially available

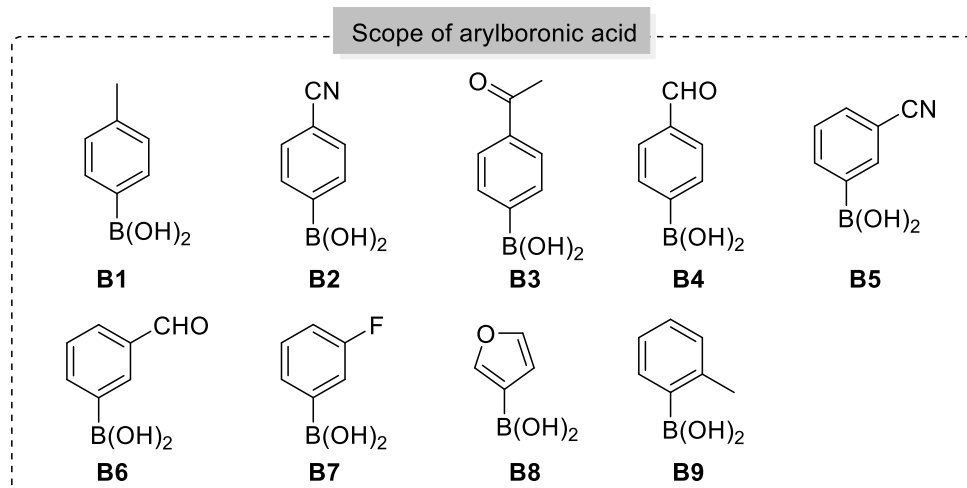

**Figure S27:** Boronic acids used in this study. All are commercially available

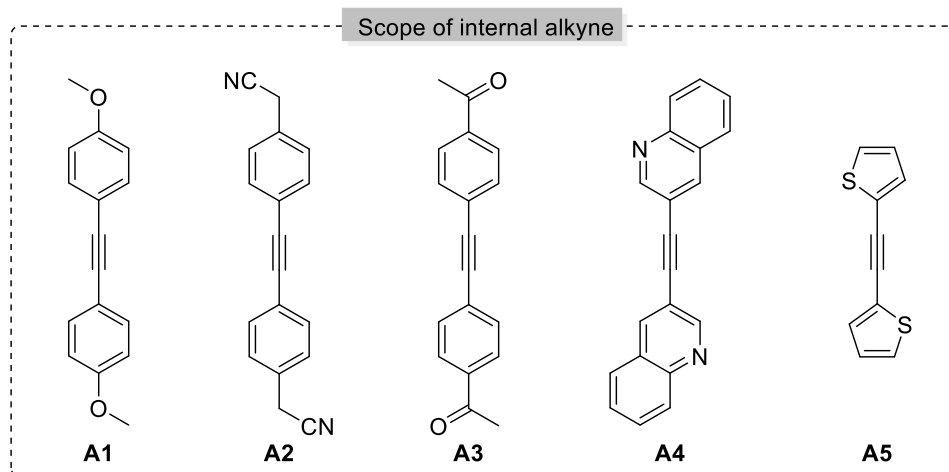

**Figure S28:** Internal alkynes used in this study. Except for **A2**, all are reported in the literature

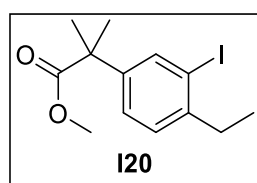

**<sup>1</sup>H NMR (500 MHz, CDCl<sub>3</sub>)** δ 7.68 (s, 1H), 7.16 (d, *J* = 9.2 Hz, 1H), 7.07 (d, *J* = 8.1 Hz, 1H), 3.57 (s, 3H), 2.62 (q, *J* = 7.6 Hz, 2H), 1.46 (s, 6H), 1.11 (t, *J* = 7.6 Hz, 3H). **<sup>13</sup>C NMR (126 MHz, CDCl<sub>3</sub>)** δ 176.8, 145.0, 144.2, 136.6, 128.3, 126.1, 100.8, 52.4, 45.9, 33.8, 26.6, 14.5. **IR(ATR/cm<sup>-1</sup>)** 2968.8, 2949.3, 2932.5, 2872.7, 2840.3, 1728.6, 1598.0, 1546.1, 1484.9, 1470.9, 1461.2, 1433.0, 1386.2, 1368.4, 1253.2, 1189.6, 1144.2, 1103.9, 1061.0, 1027.3, 1014.3, 988.3, 927.3, 879.2, 849.3, 828.6, 803.9, 774.0, 715.6, 664.9, 628.6, 611.7. **HRMS (ESI)** *m/z* calcd. for C<sub>13</sub>H<sub>18</sub>IO<sub>2</sub> ([M+H]<sup>+</sup>) 333.0346, found *m/z* 333.0354.

#### Synthesis of internal alkynes

*General Procedure A:* The reported procedure was followed with some modifications.<sup>9</sup> Corresponding aryl halide (5.0 mmol) was taken into 50 mL two neck RB with magnetic stirring bar under argon atmosphere. It was vacuumed for 5 min and filled back with argon. 10 mL pre-degassed triethylamine (Et<sub>3</sub>N) was added and charged with PdCl<sub>2</sub>(PPh<sub>3</sub>)<sub>2</sub> (5.0 mol%) along with CuI (1.0 mol %) under inert atmosphere. The whole solution was again degassed for 5 min. Lastly, corresponding aryl acetylene (5.1 mmol) was added and stoppered tightly. Further, it was allowed to run at rt for 12 h. Thereafter, Et<sub>3</sub>N was neutralized via slow addition of 1M aqueous HCl solution under stirring mode. The neutralized reaction mixture was extracted using DCM (3 × 10 mL). The extracted organic layer underwent washing with brine solution (10 mL) followed by drying using anhydrous Na<sub>2</sub>SO<sub>4</sub>. Furthermore, the solvent was evaporated under reduced pressure, and a slurry was prepared. The slurry was packed into a column, and the corresponding compound was purified using ethyl acetate and hexane as eluent. Finally, the solvent was reduced to get desired internal aryl alkynes.

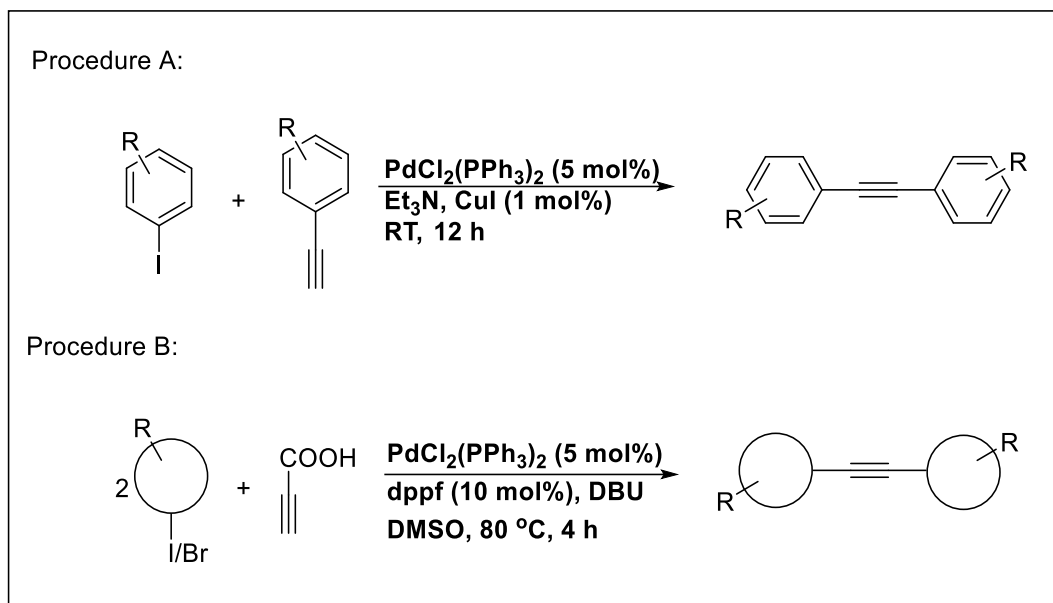

**Figure S29:** Schematic protocol for the synthesis of internal alkynes

*General Procedure B:* This procedure was followed according to the reported literature with some modifications.<sup>10</sup> Aryl halide (4.0 mmol) was introduced into 25 ml two neck RB equipped with magnetic bead followed by  $\text{PdCl}_2(\text{PPh}_3)_2$  (5.0 mol%), 1,1'-bis(diphenylphosphino)ferrocene (dppe) (10.0 mol%), DMSO (2.0 mL) and 1,8-diazabicyclo[5.4.0]undec-7-ene (DBU) (4.0 mmol) under inert atmosphere. It was stirred for a minute, and then after, propionic acid (2.0 mmol) was charged, followed by capping the RB tightly. After stirring at 80 °C for 4h, the reaction mixture was allowed to attain room temperature. Further, the reaction mixture was extracted using brine solution and ethyl acetate (5 x 4 mL). The organic layer was washed with fresh distilled water (4.0 mL) and dried using anhydrous  $\text{Na}_2\text{SO}_4$ . A slurry was prepared after evaporating the solvent under a rotary evaporator. The slurry was charged into the column afterward, and the product was eluted using ethyl acetate and hexane as eluent. Finally, the desired compound was obtained after evaporating the solvent under reduced pressure.

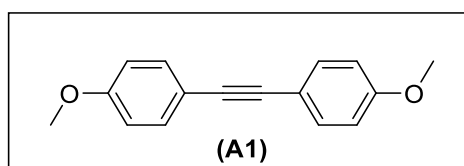

1,2-bis(4-methoxyphenyl)ethyne (**A1**) has been synthesized following general procedure A. It is a colorless solid compound with 84% yield (1000.1 mg, 4.2 mmol). The NMR was found to be matched with reported value in literature.<sup>10</sup>  $^1\text{H}$  NMR (400 MHz,  $\text{CDCl}_3$ )  $\delta$  7.37 (d,  $J = 9.2$  Hz, 4H), 6.79 (d,  $J = 8.5$  Hz, 4H), 3.74 (s, 6H)  $^{13}\text{C}$  NMR (126 MHz,  $\text{CDCl}_3$ )  $\delta$  159.5, 133.0, 115.8, 114.1, 88.1, 55.4.

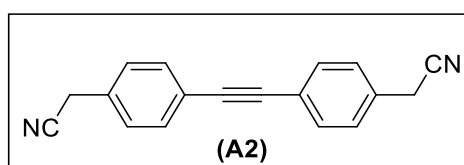

2,2'-(ethyne-1,2-diylbis(4,1-phenylene))diacetonitrile (**A2**) has been synthesized following general procedure B. It is a yellowish solid compound with 70% yield (358.6 mg, 1.4 mmol).  $^1\text{H NMR}$  (500 MHz,  $\text{CDCl}_3$ )  $\delta$  7.47 (d,  $J = 7.9$  Hz, 4H), 7.25 (d,  $J = 7.9$  Hz, 4H), 3.70 (s, 4H).  $^{13}\text{C NMR}$  (126 MHz,  $\text{CDCl}_3$ )  $\delta$  132.4, 130.2, 128.1, 123.1, 117.5, 89.4, 23.7.  $\text{IR}(\text{ATR}/\text{cm}^{-1})$  2943.8, 2917.8, 2244.6, 1511.5, 1410.2, 1186.6, 1103.4, 1020.2, 921.5, 833.3, 796.7, 708.3  $\text{HRMS (ESI)}$   $m/z$  calcd. for  $\text{C}_{18}\text{H}_{12}\text{N}_2\text{Na}$  ( $[\text{M}+\text{Na}]^+$ ) 279.0893, found  $m/z$  279.0923.

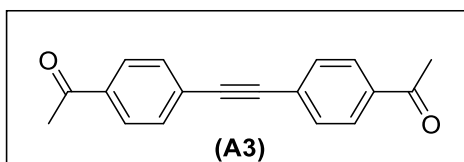

1,1'-(ethyne-1,2-diylbis(4,1-phenylene))bis(ethan-1-one) (**A3**) has been synthesized following general procedure B. It is a colorless solid compound with 68% yield (356.4 mg, 1.4 mmol). The NMR was found to be matched with reported value in literature.  $^{10} \text{H NMR}$  (500 MHz,  $\text{CDCl}_3$ )  $\delta$  7.95 (d,  $J = 8.1$  Hz, 4H), 7.63 (d,  $J = 8.1$  Hz, 4H), 2.62 (s, 6H).  $^{13}\text{C NMR}$  (126 MHz,  $\text{CDCl}_3$ )  $\delta$  197.4, 136.8, 132.0, 128.5, 127.6, 91.8, 26.8.

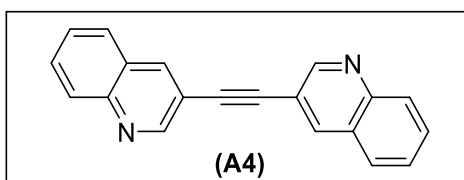

1,2-di(quinolin-3-yl)ethyne (**A4**) has been synthesized following general procedure B. It is a yellowish solid compound with 72% yield (403.4 mg, 1.4 mmol). The NMR was found to be matched with reported value in literature.  $^{11} \text{H NMR}$  (500 MHz,  $\text{CDCl}_3$ )  $\delta$  9.05 (d,  $J = 2.1$  Hz, 2H), 8.37 (d,  $J = 2.1$  Hz, 2H), 8.12 (d,  $J = 8.4$  Hz, 2H), 7.82 (d,  $J = 8.1$  Hz, 2H), 7.75 (t,  $J = 7.7$  Hz, 2H), 7.58 (t,  $J = 7.5$  Hz, 2H).  $^{13}\text{C NMR}$  (126 MHz,  $\text{CDCl}_3$ )  $\delta$  151.9, 147.0, 138.7, 130.5, 129.5, 127.7, 127.5, 127.2, 116.8, 89.9.

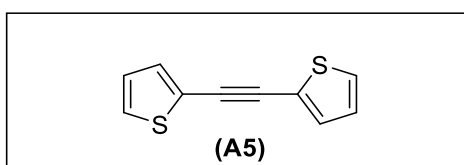

1,2-di(thiophen-2-yl)ethyne (**A5**) has been synthesized following general procedure B. It is a colorless solid compound with 74% yield (281.2 mg, 1.5 mmol). The NMR was found to be matched with reported value in literature.  $^{10} \text{H NMR}$  (500 MHz,  $\text{CDCl}_3$ )  $\delta$  7.23 (d,  $J = 5.6$  Hz, 2H), 7.21 (d,  $J = 3.8$  Hz, 2H), 6.97 – 6.92 (m, 2H).  $^{13}\text{C NMR}$  (126 MHz,  $\text{CDCl}_3$ )  $\delta$  132.2, 127.7, 127.3, 123.0, 86.3.

### Section SM-VIII: Catalytic activity of Pd@PKPOP

#### General procedure for optimization of reaction condition

To a 16 mL culture tube equipped with a magnetic stirrer bar, the required amount of Pd@PKPOP, 1,2-bis(4-methoxyphenyl)ethyne (**A1**), *p*-tolylboronic acid (**B1**), 1-iodo-2-methylbenzene (**I1**)  $\text{Na}_2\text{CO}_3$  and 1,3,5-trimethoxybenzene as internal standard were taken

under inert atmosphere, followed by dried DMF was added. Thereafter, it was capped tightly and kept in an ambient pre-heated oil bath at 250 rpm stirring. After stirring for the speculated time, it was kept to attain rt. 2 mL brine solution, and 5 mL ethyl acetate was poured into the same culture tube. The mixture was shaken well and allowed the layer to be separated. 2 mL aliquot of separated ethyl acetate was dried under anhydrous Na<sub>2</sub>SO<sub>4</sub>. The ethyl acetate was well evaporated, and the residue was dissolved into 0.5 mL CDCl<sub>3</sub> solvent. Further, it was transferred into an NMR tube, and the product was quantified through <sup>1</sup>H NMR analysis. 1,2-bis(4-methoxyphenyl)ethyne **A1** was treated as limiting reagent.

**Table ST4: Temperature variation**

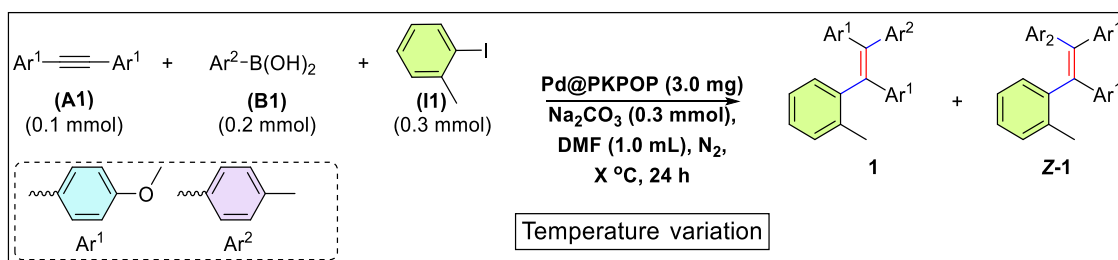

| Entry    | Temperature (°C) | Yield (%) <sup>a</sup><br>( <b>1</b> + <b>Z-1</b> ) | Selectivity<br>( <b>1</b> : <b>Z-1</b> ) |
|----------|------------------|-----------------------------------------------------|------------------------------------------|
| 1        | 90               | 70                                                  | 87 : 13                                  |
| 2        | 100              | 90                                                  | 88 : 12                                  |
| <b>3</b> | <b>110</b>       | <b>96 (91)<sup>b</sup></b>                          | <b>90 : 10</b>                           |
| 4        | 120              | 94                                                  | 89 : 11                                  |
| 5        | 130              | 91                                                  | 89 : 11                                  |
| 6        | 140              | 91                                                  | 88 : 12                                  |
| 7        | 150              | 73                                                  | 88 : 12                                  |

*Reaction conditions:* **A1** (0.1 mmol), **B1** (0.2 mmol), **I1** (0.3 mmol), DMF (1.0 mL), Na<sub>2</sub>CO<sub>3</sub> (0.3 mmol), **Pd@PKPOP** (3.0 mg, 2.7 wt% Pd), 24 h, N<sub>2</sub>. <sup>a</sup>Yield was determined by <sup>1</sup>H NMR using 1,3,5-trimethoxybenzene as an internal standard. <sup>b</sup>Isolated yield

**Table ST5: Amount of reactants variation**

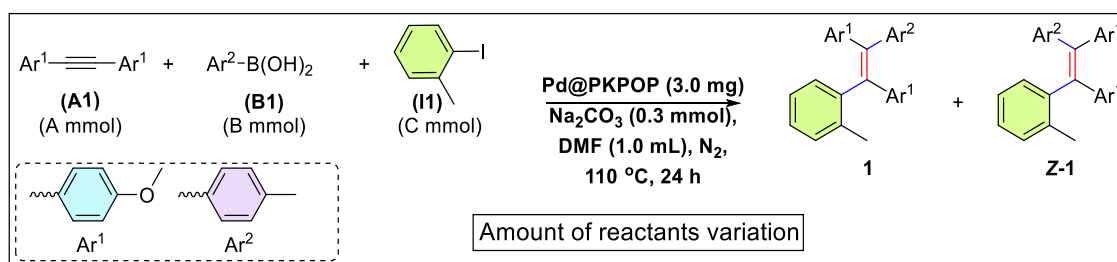

| Entry    | Amount of reactants<br>(10 <sup>-1</sup> mmol) | Yield (%) <sup>a</sup><br>( <b>1</b> + <b>Z-1</b> ) | Selectivity<br>( <b>1</b> : <b>Z-1</b> ) |
|----------|------------------------------------------------|-----------------------------------------------------|------------------------------------------|
| 1        | 1:2:3                                          | 96                                                  | 90 : 10                                  |
| <b>2</b> | <b>1:1.5:2</b>                                 | <b>96 (91)<sup>b</sup></b>                          | <b>90 : 10</b>                           |
| 3        | 1:1.2:1.5                                      | 88                                                  | 89 : 11                                  |
| 4        | 1:1.1:1.2                                      | 81                                                  | 89 : 11                                  |

*Reaction conditions:* DMF (1.0 mL), Na<sub>2</sub>CO<sub>3</sub> (0.3 mmol), **Pd@PKPOP** (3.0 mg, 2.7 wt% Pd), 110 °C, 24 h, N<sub>2</sub>. <sup>a</sup>Yield was determined by <sup>1</sup>H NMR using 1,3,5-trimethoxybenzene as an internal standard. <sup>b</sup>Isolated yield



**Table ST6: Solvents variation**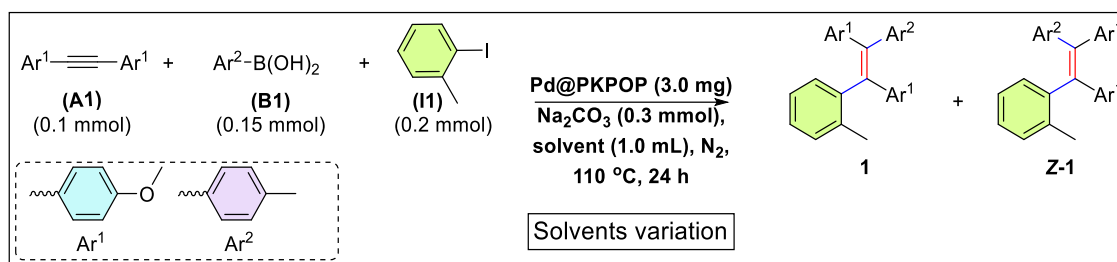

| Entry    | Solvent (1.0 mL)                             | Yield (%) <sup>a</sup> (1 + Z-1) | Selectivity (1 : Z-1) |
|----------|----------------------------------------------|----------------------------------|-----------------------|
| 1        | Tetrahydrofuran (THF)                        | trace                            | -                     |
| 2        | <i>ter</i> -Amylalcohol ( <sup>t</sup> AmOH) | trace                            | -                     |
| <b>3</b> | <b>DMF</b>                                   | <b>96 (91)<sup>b</sup></b>       | <b>90 : 10</b>        |
| 4        | Toluene                                      | trace                            | -                     |
| 5        | Acetonitrile (MeCN)                          | 10                               | 85 : 15               |
| 6        | Water (H <sub>2</sub> O)                     | 10                               | 100 : 0               |
| 7        | 1,2-dichloroethane (DCE)                     | trace                            | -                     |
| 8        | Dimethylsulphoxide (DMSO)                    | 80                               | 78 : 22               |
| 9        | Chlorobenzene (PhCl)                         | trace                            | -                     |
| 10       | Benzene                                      | trace                            | -                     |
| 11       | 1,4-dioxane                                  | 20                               | 95 : 05               |

Reaction conditions: **A1** (0.1 mmol), **B1** (0.15 mmol), **I1** (0.2 mmol), Na<sub>2</sub>CO<sub>3</sub> (0.3 mmol), Pd@PKPOP (3.0 mg, 2.7 wt% Pd), 110 °C, 24 h, N<sub>2</sub>. <sup>a</sup>Yield was determined by <sup>1</sup>H NMR using 1,3,5-trimethoxybenzene as an internal standard. <sup>b</sup>Isolated yield

**Table ST7: Volume of DMF variation**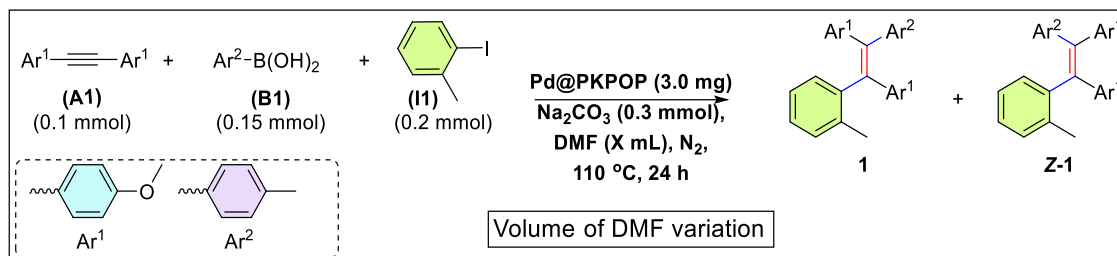

| Entry    | Volume of DMF (mL) | Yield (%) <sup>a</sup> (1 + Z-1) | Selectivity (1 : Z-1) |
|----------|--------------------|----------------------------------|-----------------------|
| 1        | 0.1                | 83                               | 86 : 14               |
| 2        | 0.25               | 84                               | 86 : 14               |
| 3        | 0.5                | 92                               | 89 : 11               |
| <b>4</b> | <b>1.0</b>         | <b>96 (91)<sup>b</sup></b>       | <b>90 : 10</b>        |
| 5        | 1.5                | 92                               | 90 : 10               |

Reaction conditions: **A1** (0.1 mmol), **B1** (0.15 mmol), **I1** (0.2 mmol), Na<sub>2</sub>CO<sub>3</sub> (0.3 mmol), Pd@PKPOP (3.0 mg, 2.7 wt% Pd), 110 °C, 24 h, N<sub>2</sub>. <sup>a</sup>Yield was determined by <sup>1</sup>H NMR using 1,3,5-trimethoxybenzene as an internal standard. <sup>b</sup>Isolated yield

**Table ST8: Time variation**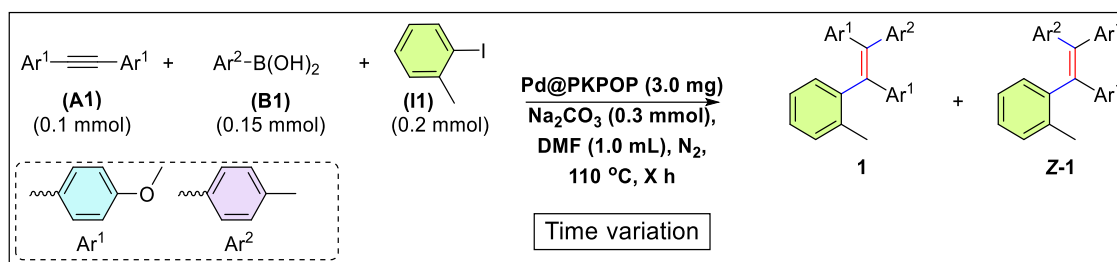

| Entry    | Time (h)  | Yield (%) <sup>a</sup><br>(1 + Z-1) | Selectivity<br>(1 : Z-1) |
|----------|-----------|-------------------------------------|--------------------------|
| 1        | 16        | 72                                  | 89 : 11                  |
| 2        | 20        | 81                                  | 89 : 11                  |
| <b>3</b> | <b>24</b> | <b>96 (91)<sup>b</sup></b>          | <b>90 : 10</b>           |
| 4        | 36        | 95                                  | 90 : 10                  |
| 5        | 48        | 95                                  | 90 : 10                  |

Reaction conditions: **A1** (0.1 mmol), **B1** (0.15 mmol), **I1** (0.2 mmol),  $\text{Na}_2\text{CO}_3$  (0.3 mmol), **Pd@PKPOP** (3.0 mg, 2.7 wt% Pd),  $\text{N}_2$ . <sup>a</sup>Yield was determined by  $^1\text{H}$  NMR using 1,3,5-trimethoxybenzene as an internal standard. <sup>b</sup>Isolated yield

**Table ST9: PdCl<sub>2</sub> loading at PKPOP variation**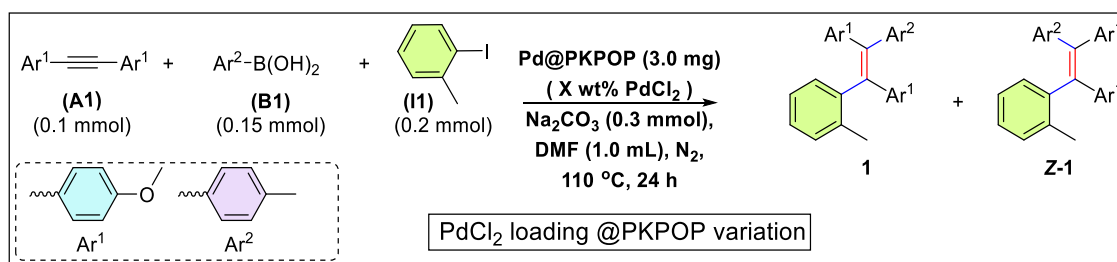

| Entry                | Theoretical loading of PdCl <sub>2</sub> over PKPOP (wt%) | Yield (%) <sup>a</sup><br>(1 + Z-1) | Selectivity<br>(1 : Z-1) |
|----------------------|-----------------------------------------------------------|-------------------------------------|--------------------------|
| 1                    | 2                                                         | 46                                  | 89 : 11                  |
| 2                    | 4                                                         | 81                                  | 89 : 11                  |
| 3                    | 6                                                         | 96                                  | 90 : 10                  |
| 4                    | 8                                                         | 96                                  | 90 : 10                  |
| <b>5<sup>c</sup></b> | <b>6</b>                                                  | <b>96 (91)<sup>b</sup></b>          | <b>90 : 10</b>           |
| 6 <sup>d</sup>       | 6                                                         | 71                                  | 90 : 10                  |

Reaction conditions: **A1** (0.1 mmol), **B1** (0.15 mmol), **I1** (0.2 mmol),  $\text{Na}_2\text{CO}_3$  (0.3 mmol), **Pd@PKPOP** (3.0 mg), 110 °C, 24 h,  $\text{N}_2$ . <sup>a</sup>Yield was determined by  $^1\text{H}$  NMR using 1,3,5-trimethoxybenzene as an internal standard. <sup>b</sup>Isolated yield. <sup>c</sup>**Pd@PKPOP** (2.0 mg), <sup>d</sup>**Pd@PKPOP** (1.5 mg)

**Table ST10:** Amount of Na<sub>2</sub>CO<sub>3</sub> variation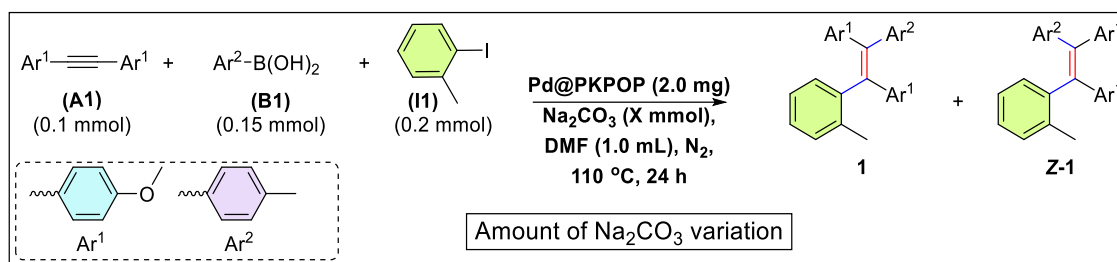

| Entry    | Amount of Na <sub>2</sub> CO <sub>3</sub> (mmol) | Yield (%) <sup>a</sup><br>(1 + Z-1) | Selectivity<br>(1 : Z-1) |
|----------|--------------------------------------------------|-------------------------------------|--------------------------|
| 1        | 0.05                                             | 72                                  | 90 : 10                  |
| 2        | 0.10                                             | 81                                  | 90 : 10                  |
| 3        | 0.15                                             | 87                                  | 90 : 10                  |
| <b>4</b> | <b>0.20</b>                                      | <b>96 (91)<sup>b</sup></b>          | <b>90 : 10</b>           |
| 5        | 0.30                                             | 96                                  | 90 : 10                  |

Reaction conditions: **A1** (0.1 mmol), **B1** (0.15 mmol), **I1** (0.2 mmol), **Pd@PKPOP** (2.0 mg, 2.7 wt% Pd), 110 °C, 24 h, N<sub>2</sub>. <sup>a</sup>Yield was determined by <sup>1</sup>H NMR using 1,3,5-trimethoxybenzene as an internal standard. <sup>b</sup>Isolated yield

**Table S11:** Final optimized condition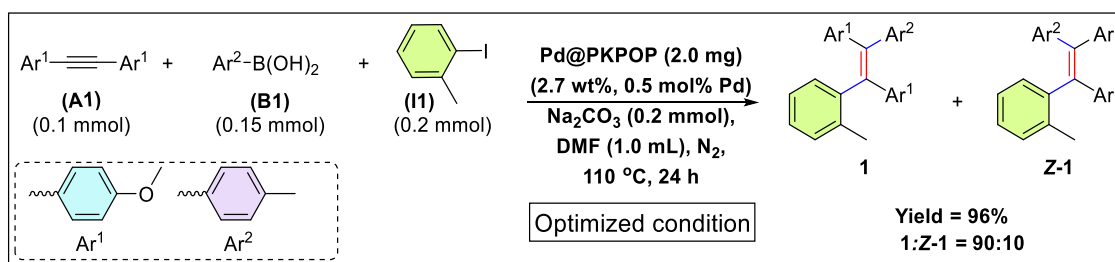

General procedure for palladium-catalyzed *trans*-selective dicarbofunctionalization of internal alkynes via Pd@PKPOP

To a 16 mL culture tube equipped with a magnetic stirrer bar, **Pd@PKPOP** (2.0 mg, 0.5 mol% Pd), diarylacetylene **Ax** (0.1 mmol), aryl boronic acid **Bx** (0.15 mmol), aryl halide **Ix** (0.2 mmol) and Na<sub>2</sub>CO<sub>3</sub> (0.2 mmol) were taken under inert atmosphere. Dried DMF (1.0 mL) was then added, and the tube was capped tightly and kept in a pre-heated (110 °C) oil bath at 250 rpm stirring speed. After 24 h, the oil bath was removed, and the mixture was allowed to attain rt. The reaction mixture was transferred into a centrifuge tube, and the catalyst was centrifuged. The mother liquor was added to brine (5 mL) and then extracted using ethyl acetate (3 x 2 mL). The organic layer was washed with distilled water (5mL) and dried over anhydrous Na<sub>2</sub>SO<sub>4</sub>. Further, the organic layer was evaporated under reduced pressure, and a slurry was prepared. The slurry was packed into a silica gel column and eluted using ethyl acetate and hexane as eluent. The final product was obtained after reducing the eluent under the rota-evaporator. The major product *E* has been given w.r.t internal alkyne.

Note:- The general reaction time was 24 h unless explicitly stated.

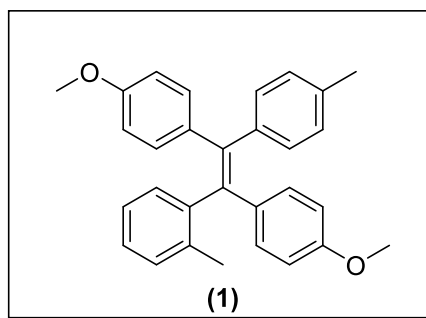

(*Z*)-4,4'-(1-(*o*-tolyl)-2-(*p*-tolyl)ethene-1,2-diyl)bis(methoxybenzene) (**1**) has been obtained as a colorless solid in 91% yield.  $R_f = 0.4$ , **Eluent** = EtOAc : hexane (0.5 : 99.5), **Amount** = 38.2 mg, 0.091 mmol, **Selectivity** = 90 : 10. The NMR data was found to be matched with the reported literature value.<sup>12</sup>  $^1\text{H NMR}$  (500 MHz,  $\text{CDCl}_3$ )  $\delta$  6.98 – 6.90 (m, 4H), 6.90 – 6.85 (m, 4H), 6.80 – 6.75 (m, 4H), 6.50 (d,  $J = 8.9$  Hz, 2H), 6.47 (d,  $J = 6.9$  Hz, 2H), 3.62 (s, 3H), 3.60 (s, 3H), 2.19 (s, 3H), 1.98 (s, 3H).  $^{13}\text{C NMR}$  (126 MHz,  $\text{CDCl}_3$ )  $\delta$  158.0, 157.8, 143.7, 141.0, 140.2, 138.4, 136.7, 136.6, 136.0, 135.8, 131.9, 131.88, 131.5, 130.2, 128.6, 126.7, 125.5, 113.1, 112.8, 55.17, 55.17, 21.3, 20.3.

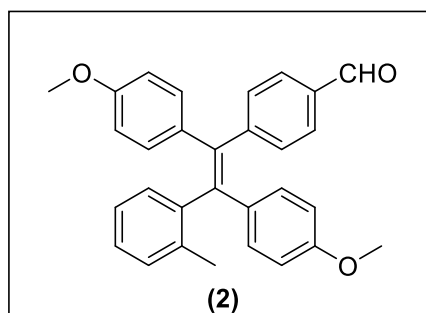

(*Z*)-4-(1,2-bis(4-methoxyphenyl)-2-(*o*-tolyl)vinyl)benzaldehyde (**2**) has been obtained as a light yellowish green solid in 91% yield.  $R_f = 0.3$ , **Eluent** = EtOAc : hexane (0.5 : 99.5), **Amount** = 39.4 mg, 0.091 mmol, **Selectivity** = 92 : 8.  $^1\text{H NMR}$  (400 MHz,  $\text{CDCl}_3$ )  $\delta$  9.83 (s, 1H), 7.57 (d,  $J = 8.5$  Hz, 2H), 7.17 (d,  $J = 7.9$  Hz, 2H), 6.98 – 6.90 (m, 4H), 6.76 (d,  $J = 3.1$  Hz, 2H), 6.74 (d,  $J = 3.1$  Hz, 2H), 6.50 (d,  $J = 2.4$  Hz, 2H), 6.48 (d,  $J = 2.4$  Hz, 2H), 3.60 (s, 3H), 3.59 (s, 3H), 1.99 (s, 3H).  $^{13}\text{C NMR}$  (101 MHz,  $\text{CDCl}_3$ )  $\delta$  192.0, 158.4, 158.3, 151.0, 142.9, 140.9, 139.1, 136.5, 135.4, 134.8, 134.4, 132.2, 132.0, 131.9, 131.6, 130.3, 129.4, 127.1, 125.7, 113.3, 113.1, 55.1, 20.3. **IR** (ATR/ $\text{cm}^{-1}$ ) 3011.4, 2975.0, 2941.0, 2915.2, 2839.8, 2730.6, 1698.7, 1594.7, 1508.9, 1451.8, 1246.6, 1173.6, 1022.9, 809.7 **HRMS** (ESI)  $m/z$  calcd. for  $\text{C}_{30}\text{H}_{26}\text{NaO}_3$  ( $[\text{M}+\text{Na}]^+$ ) 457.1774, found  $m/z$  457.1797.

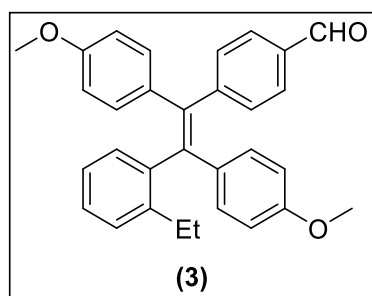

(*Z*)-4-(2-(2-ethylphenyl)-1,2-bis(4-methoxyphenyl)vinyl)benzaldehyde (**3**) has been obtained as a light yellowish green solid compound in 92% yield.  $R_f = 0.3$ , **Eluent** = EtOAc : hexane (0.5 : 99.5), **Amount** = 41.5 mg, 0.092 mmol, **Selectivity** = 94 : 6. **mp** = 146-148 °C.  $^1\text{H NMR}$  (500 MHz,  $\text{CDCl}_3$ )  $\delta$  9.84 (s, 1H), 7.57 (d, 2H), 7.17 (d,  $J = 10.4$  Hz, 2H), 7.04 (d,  $J = 2.4$  Hz, 1H), 7.03 (d, 1H), 6.97 – 6.93 (m, 1H), 6.93 – 6.88 (m, 1H), 6.76 (d, 2H), 6.73 (d, 2H), 6.50 (d, 2H), 6.48 (d, 2H), 3.61 (s, 3H), 3.60 (s, 3H), 2.52 – 2.44 (m, 1H), 2.38 – 2.30 (m, 1H), 0.87 (t,  $J = 7.6$  Hz, 3H).  $^{13}\text{C NMR}$  (126 MHz,  $\text{CDCl}_3$ )  $\delta$  192.0, 158.4, 158.2, 151.1, 142.3, 141.0, 138.9, 135.3, 135.1, 134.4, 132.2, 132.1, 131.9, 131.7, 129.4, 128.5, 127.3, 125.5, 113.3, 113.1, 55.2, 55.1, 26.0, 14.4. **IR** (ATR/ $\text{cm}^{-1}$ ) 2964.6, 2930.8, 2839.8, 2730.6, 1693.5, 1597.3, 1506.3, 1243.8, 1171.0, 1022.9, 833.1, 812.3, 760.3 **HRMS** (ESI)  $m/z$  calcd. for  $\text{C}_{31}\text{H}_{28}\text{NaO}_3$  ( $[\text{M}+\text{Na}]^+$ ) 471.1931, found  $m/z$  471.1928.

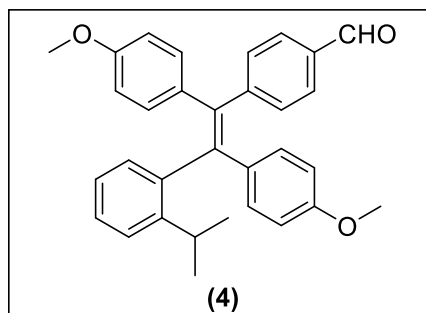

(*Z*)-4-(2-(2-isopropylphenyl)-1,2-bis(4-methoxyphenyl)vinyl)benzaldehyde (**4**) has been obtained as an orange solid in 71% yield.  $R_f = 0.3$ , **Eluent** = EtOAc : hexane (0.5 : 99.5), **Amount** = 32.7 mg, 0.071 mmol, **Selectivity** = 95 : 5.  $^1\text{H NMR}$  (500 MHz,  $\text{CDCl}_3$ )  $\delta$  9.86 (s, 1H), 7.59 (d,  $J = 8.5$  Hz, 2H), 7.18 (d,  $J = 8.5$  Hz, 2H), 7.13 – 7.09 (m, 2H), 6.97 – 6.92 (m, 2H), 6.78 (d,  $J = 2.4$  Hz, 2H), 6.76 (d,  $J = 3.1$  Hz, 2H), 6.52 (d,  $J = 4.3$  Hz, 2H), 6.50 (d,  $J = 3.7$  Hz, 2H), 3.63 (s, 3H), 3.62 (s, 3H), 3.11 (h,  $J = 6.7$  Hz, 1H), 0.88 (d,  $J = 7.3$  Hz, 3H), 0.72 (d,  $J = 6.7$  Hz, 3H).  $^{13}\text{C NMR}$  (126 MHz,  $\text{CDCl}_3$ )  $\delta$  192.1, 158.4, 158.3, 151.1, 147.2, 141.7, 141.1, 138.9, 135.6, 135.3, 134.4, 132.3, 132.2, 131.6, 129.4, 127.6, 126.1, 125.5, 113.3, 113.2, 55.2, 30.2, 24.7, 23.2. **IR** (ATR/ $\text{cm}^{-1}$ ) 2954.2, 2930.8, 2839.8, 2735.9, 1698.7, 1599.9, 1508.9, 1454.9, 1290.6, 1241.2, 1171.0, 1030.7, 833.1, 807.1, 757.7 **HRMS** (ESI)  $m/z$  calcd. for  $\text{C}_{32}\text{H}_{30}\text{NaO}_3$  ( $[\text{M}+\text{Na}]^+$ ) 485.2087, found  $m/z$  485.2089.

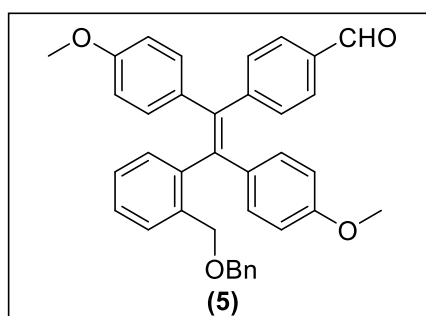

(*Z*)-4-(2-(2-((benzyloxy)methyl)phenyl)-1,2-bis(4-methoxyphenyl)vinyl)benzaldehyde (**5**) has been obtained as a light green solid in 78% yield.  $R_f = 0.4$ , **Eluent** = EtOAc : hexane (0.5 : 99.5), **Amount** = 42.0 mg, 0.078 mmol, **Selectivity** = 89 : 11.  $^1\text{H NMR}$  (500 MHz,  $\text{CDCl}_3$ )  $\delta$  9.85 (s, 1H), 7.56 (d,  $J = 8.2$  Hz, 2H), 7.31 (d,  $J = 7.6$  Hz, 1H), 7.24 (d,  $J = 2.3$  Hz, 3H), 7.22 – 7.20 (m, 1H), 7.18 (s, 1H), 7.14 – 7.11 (m, 1H), 7.09 (d,  $J = 8.2$  Hz, 2H), 7.05 (dd,  $J = 7.4$ , 1.6 Hz, 1H), 7.00 (dd,  $J = 7.6$ , 1.5 Hz, 1H), 6.77 (d,  $J = 8.9$  Hz, 2H), 6.74 (d,  $J = 8.9$  Hz, 2H), 6.50 (d,  $J = 2.1$  Hz, 2H), 6.48 (d,  $J = 2.1$  Hz, 2H), 4.40 (d,  $J = 11.9$  Hz, 1H), 4.34 (d,  $J = 11.9$  Hz, 1H), 4.29 (d,  $J = 11.9$  Hz, 1H), 4.04 (d,  $J = 11.9$  Hz, 1H), 3.64 (s, 3H), 3.62 (s, 3H).  $^{13}\text{C}$

**NMR (126 MHz, CDCl<sub>3</sub>)**  $\delta$  192.1, 158.5, 158.4, 150.9, 142.3, 140.1, 139.3, 138.5, 136.7, 135.1, 134.7, 134.4, 132.23, 132.17, 132.0, 129.4, 128.6, 128.5, 127.9, 127.7, 127.5, 127.4, 113.3, 113.2, 72.8, 70.5, 55.23, 55.18. **IR(ATR/cm<sup>-1</sup>)** 2962.0, 2925.6, 2852.8, 2733.2, 1693.5, 1602.5, 1501.1, 1456.4, 1243.8, 1173.6, 1106.0, 1069.7, 1028.1, 822.7, 796.7, 713.7, 697.9 **HRMS (ESI)**  $m/z$  calcd. for C<sub>37</sub>H<sub>32</sub>NaO<sub>4</sub> ([M+Na]<sup>+</sup>) 563.2193, found  $m/z$  563.2184.

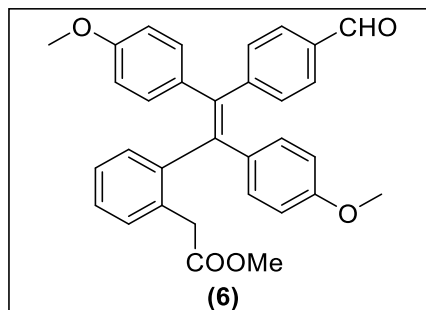

methyl (*Z*)-2-(2-(2-(4-formylphenyl)-1,2-bis(4-methoxyphenyl)vinyl)phenyl)acetate (**6**) has been obtained as a yellow solid in 91% yield. **R<sub>f</sub>** = 0.2, **Eluent** = EtOAc : hexane (0.5 : 99.5), **Amount** = 45.0 mg, 0.091 mmol, **Selectivity** = 89 : 11. **<sup>1</sup>H NMR (500 MHz, CDCl<sub>3</sub>)**  $\delta$  9.85 (s, 1H), 7.59 (d, *J* = 8.4 Hz, 2H), 7.18 (d, *J* = 2.4 Hz, 2H), 7.08 – 7.01 (m, 4H), 6.79 (d, *J* = 9.0 Hz, 2H), 6.76 (d, *J* = 8.9 Hz, 2H), 6.51 (d, *J* = 2.1 Hz, 2H), 6.50 (d, *J* = 2.3 Hz, 2H), 3.63 (s, 3H), 3.62 (s, 3H), 3.52 (d, *J* = 16.0 Hz, 1H), 3.52 (s, 3H), 3.18 (d, *J* = 16.0 Hz, 1H). **<sup>13</sup>C NMR (126 MHz, CDCl<sub>3</sub>)**  $\delta$  192.0, 172.2, 158.5, 158.4, 150.8, 143.1, 140.0, 139.6, 134.9, 134.8, 134.5, 132.7, 132.4, 132.3, 132.2, 132.1, 130.6, 129.4, 127.5, 127.1, 113.4, 113.2, 55.18, 55.16, 51.9, 38.7. **IR(ATR/cm<sup>-1</sup>)** 3003.6, 2959.4, 2928.2, 2342.4, 2738.4, 1735.1, 1690.9, 1690.9, 1602.5, 1503.7, 1290.6, 1246.4, 1207.4, 1171.0, 1028.1, 822.7, 799.3, 752.5 **HRMS (ESI)**  $m/z$  calcd. for C<sub>32</sub>H<sub>28</sub>NaO<sub>5</sub> ([M+Na]<sup>+</sup>) 515.1829, found  $m/z$  515.1823.

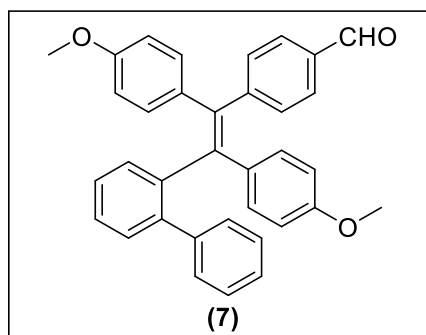

(*Z*)-4-(2-([1,1'-biphenyl]-2-yl)-1,2-bis(4-methoxyphenyl)vinyl)benzaldehyde (**7**) has been obtained as a yellowish green solid in 72% yield. **R<sub>f</sub>** = 0.4, **Eluent** = EtOAc : hexane (0.5 : 99.5), **Amount** = 35.8 mg, 0.072 mmol, **Selectivity** = 90 : 10. **<sup>1</sup>H NMR (500 MHz, CDCl<sub>3</sub>)**  $\delta$  9.79 (s, 1H), 7.50 (d, *J* = 10.1 Hz, 2H), 7.19 – 7.12 (m, 3H), 7.11 – 7.08 (m, 2H), 7.07 – 7.05 (m, 2H), 7.03 – 7.01 (m, 2H), 7.01 – 6.99 (m, 2H), 6.84 (d, *J* = 8.9 Hz, 2H), 6.50 (d, *J* = 8.9 Hz, 2H), 6.35 (d, *J* = 8.9 Hz, 2H), 6.23 (d, *J* = 6.7 Hz, 2H), 3.63 (s, 3H), 3.62 (s, 3H). **<sup>13</sup>C NMR (126 MHz, CDCl<sub>3</sub>)**  $\delta$  192.0, 158.4, 158.1, 151.5, 142.1, 141.9, 141.5, 139.3, 138.6, 135.9, 135.1, 134.2, 132.8, 132.3, 131.9, 130.5, 129.3, 128.8, 127.7, 127.6, 127.1, 126.5, 113.2, 112.8, 55.24, 55.22. **IR(ATR/cm<sup>-1</sup>)** 3011.4, 2959.4, 2933.4, 2837.2, 2811.2, 2727.5, 1696.1, 1599.9, 1507.7, 1446.6, 1243.8, 1176.8, 1033.3, 835.7, 812.3, 714.3, 700.5 **HRMS (ESI)**  $m/z$  calcd. for C<sub>35</sub>H<sub>28</sub>NaO<sub>3</sub> ([M+Na]<sup>+</sup>) 519.1931, found  $m/z$  519.1925

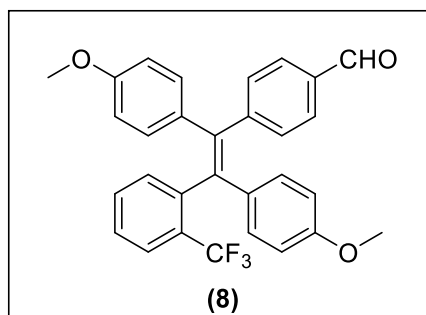

(Z)-4-(1,2-bis(4-methoxyphenyl)-2-(2-(trifluoromethyl)phenyl)vinyl)benzaldehyde (**8**) has been obtained as a light yellow solid in 34% yield. **Reaction time** = 60 h, **R<sub>f</sub>** = 0.2, **Eluent** = EtOAc : hexane (0.5 : 99.5), **Amount** = 16.7 mg, 0.034 mmol, **Selectivity** = 87 : 13. **<sup>1</sup>H NMR (500 MHz, CDCl<sub>3</sub>)** δ 9.96 (s, 1H), 7.70 (d, *J* = 8.2 Hz, 2H), 7.61 – 7.58 (m, 1H), 7.41 – 7.37 (m, 1H), 7.33 – 7.30 (m, 1H), 7.30 – 7.29 (m, 1H), 7.27 (d, *J* = 6.4 Hz, 2H), 6.88 (d, *J* = 9.0 Hz, 2H), 6.85 (d, *J* = 9.0 Hz, 2H), 6.62 (d, *J* = 1.4 Hz, 2H), 6.60 (d, *J* = 1.4 Hz, 2H), 3.74 (s, 3H), 3.72 (s, 3H). **<sup>13</sup>C NMR (126 MHz, CDCl<sub>3</sub>)** δ 191.9, 158.5, 158.3, 150.5, 141.7 (q, *J* = 0.8 Hz), 139.6, 138.9, 134.7, 134.4, 133.9, 133.7, 132.1, 132.0, 131.7 (q, *J* = 6.5 Hz), 131.3, 129.3, 129.2, 127.1, 126.91 (q, *J* = 4.8 Hz), 124.16 (q, *J* = 272.1 Hz), 113.1, 55.08, 55.06. **<sup>19</sup>F NMR (471 MHz, CDCl<sub>3</sub>)** δ -58.7. **IR (ATR/cm<sup>-1</sup>)** 2956.8, 2920.4, 2847.6, 2741.0, 1701.3, 1602.5, 1506.3, 1456.9, 1308.8, 1246.4, 1171.0, 1124.2, 1106.0, 1125.4, 827.9, 814.9, 775.9. **HRMS (ESI)** *m/z* calcd. for C<sub>30</sub>H<sub>23</sub>F<sub>3</sub>NaO<sub>3</sub> ([M+Na]<sup>+</sup>) 511.1492, found *m/z* 511.1487.

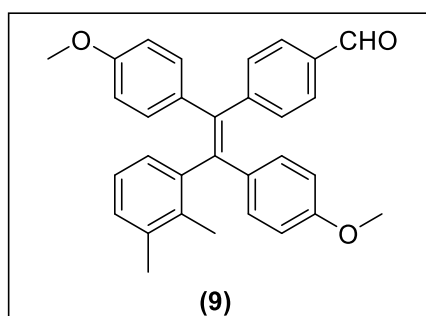

(Z)-4-(2-(2,3-dimethylphenyl)-1,2-bis(4-methoxyphenyl)vinyl)benzaldehyde (**9**) has been obtained as a light yellowish green solid in 93% yield **R<sub>f</sub>** = 0.3, **Eluent** = EtOAc : hexane (0.5:99.5), **Amount** = 42.0 mg, 0.093 mmol, **Selectivity** = 97 : 3. **mp** = 140-142 °C. **<sup>1</sup>H NMR (500 MHz, CDCl<sub>3</sub>)** δ 9.86 (s, 1H), 7.59 (d, *J* = 6.6 Hz, 2H), 7.18 (d, *J* = 8.2 Hz, 2H), 6.91 – 6.82 (m, 3H), 6.76 (d, *J* = 6.6 Hz, 2H), 6.74 (d, *J* = 6.4 Hz, 2H), 6.52 (d, *J* = 2.7 Hz, 2H), 6.50 (d, *J* = 2.6 Hz, 2H), 3.64 (s, 3H), 3.63 (s, 3H), 2.10 (s, 3H), 1.94 (s, 3H). **<sup>13</sup>C NMR (126 MHz, CDCl<sub>3</sub>)** δ 192.1, 158.3, 158.2, 151.1, 143.0, 141.5, 138.9, 137.0, 135.6, 135.2, 135.0, 134.4, 132.3, 132.0, 131.8, 129.4, 129.3, 128.6, 125.2, 113.3, 113.1, 55.23, 55.20, 20.6, 16.8. **IR (ATR/cm<sup>-1</sup>)** 2969.8, 2941.2, 2834.6, 2735.8, 1703.9, 1597.3, 1506.3, 1462.2, 1251.6, 1168.4, 1022.9, 825.3, 791.5, 708.3. **HRMS (ESI)** *m/z* calcd. for C<sub>31</sub>H<sub>28</sub>NaO<sub>3</sub> ([M+Na]<sup>+</sup>) 471.1931, found *m/z* 471.1926.

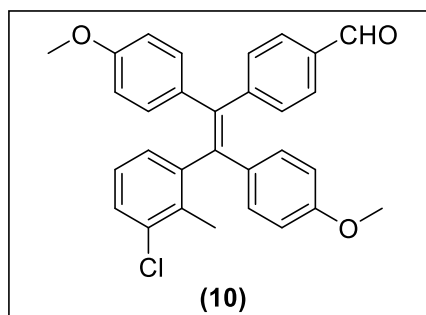

(*Z*)-4-(2-(3-chloro-2-methylphenyl)-1,2-bis(4-methoxyphenyl)vinyl)benzaldehyde (**10**) has been obtained as an orange solid in 90% yield.  $R_f = 0.3$ , **Eluent** = EtOAc : hexane (0.5 : 99.5), **Amount** = 42.0 mg, 0.090 mmol, **Selectivity** = 90 : 10.  $^1\text{H NMR}$  (500 MHz,  $\text{CDCl}_3$ )  $\delta$  9.86 (s, 1H), 7.60 (d,  $J = 8.4$  Hz, 2H), 7.17 (d,  $J = 8.5$  Hz, 2H), 7.11 (dd,  $J = 6.8, 2.5$  Hz, 1H), 6.90 – 6.88 (m, 2H), 6.75 (d,  $J = 3.4$  Hz, 2H), 6.73 (d,  $J = 3.4$  Hz, 2H), 6.54 (d,  $J = 3.2$  Hz, 2H), 6.52 (d,  $J = 3.4$  Hz, 2H), 3.64 (s, 3H), 3.64 (s, 3H), 2.08 (s, 3H).  $^{13}\text{C NMR}$  (126 MHz,  $\text{CDCl}_3$ )  $\delta$  192.0, 158.5, 158.5, 150.5, 145.0, 140.3, 139.8, 135.3, 135.0, 134.8, 134.6, 134.3, 132.2, 131.9, 131.8, 130.2, 129.5, 128.0, 126.5, 113.5, 113.3, 55.24, 55.22, 17.6. **IR** (ATR/ $\text{cm}^{-1}$ ) 2951.6, 2928.2, 2834.6, 2738.4, 1701.2, 1602.5, 1514.1, 1462.2, 1246.4, 1171.0, 1028.1, 817.5, 786.3, 726.5, 697.9. **HRMS** (ESI)  $m/z$  calcd. for  $\text{C}_{30}\text{H}_{25}\text{ClNaO}_3$  ( $[\text{M}+\text{Na}]^+$ ) 491.1384, found  $m/z$  491.1376.

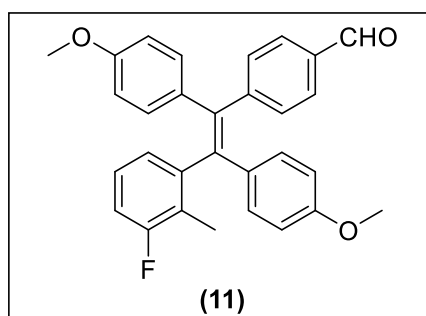

(*Z*)-4-(2-(3-fluoro-2-methylphenyl)-1,2-bis(4-methoxyphenyl)vinyl)benzaldehyde (**11**) has been obtained as a light yellowish green solid in 92% yield.  $R_f = 0.3$ , **Eluent** = EtOAc : hexane (0.5 : 99.5), **Amount** = 41.8 mg, 0.092 mmol, **Selectivity** = 91 : 9.  $^1\text{H NMR}$  (500 MHz,  $\text{CDCl}_3$ )  $\delta$  9.86 (s, 1H), 7.60 (d,  $J = 10.1$  Hz, 2H), 7.18 (d,  $J = 7.3$  Hz, 2H), 6.91 (td,  $J = 7.5, 5.3$  Hz, 1H), 6.78 (d,  $J = 7.8$  Hz, 2H), 6.76 (d,  $J = 2.0$  Hz, 2H), 6.74 (d,  $J = 1.8$  Hz, 2H), 6.53 (d,  $J = 8.2$  Hz, 4H), 3.65 (s, 3H), 3.65 (s, 3H), 1.92 (d,  $J = 2.4$  Hz, 3H).  $^{13}\text{C NMR}$  (126 MHz,  $\text{CDCl}_3$ )  $\delta$  192.0, 161.7 (d,  $J = 244.0$  Hz), 158.5, 158.5, 150.6, 145.3 (d,  $J = 4.5$  Hz), 139.9, 139.6 (d,  $J = 2.3$  Hz), 135.1, 134.6, 134.5, 132.2, 131.9, 131.8, 129.5, 127.2 (d,  $J = 3.1$  Hz), 126.5 (d,  $J = 9.0$  Hz), 124.0 (d,  $J = 16.6$  Hz), 113.6 (d,  $J = 24.8$  Hz), 113.5, 113.3, 55.2, 55.2, 12.0 (d,  $J = 5.0$  Hz).  $^{19}\text{F NMR}$  (471 MHz,  $\text{CDCl}_3$ )  $\delta$  -116.2. **IR** (ATR/ $\text{cm}^{-1}$ ) 2964.6, 2930.8, 2839.8, 2741.0, 2738.4, 1709.1, 1597.3, 1501.1, 1457.0, 1236.0, 1176.2, 1025.5, 830.5, 781.1, 708.3. **HRMS** (ESI)  $m/z$  calcd. for  $\text{C}_{30}\text{H}_{25}\text{FNaO}_3$  ( $[\text{M}+\text{Na}]^+$ ) 475.1680, found  $m/z$  475.1676.



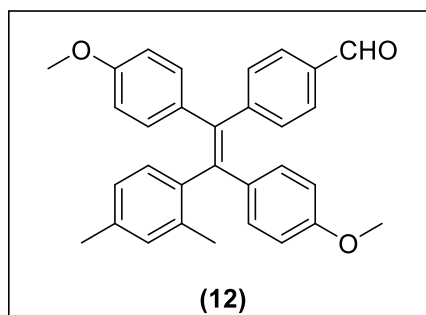

(*Z*)-4-(2-(2,4-dimethylphenyl)-1,2-bis(4-methoxyphenyl)vinyl)benzaldehyde (**12**) has been obtained as a light yellowish green solid in 92% yield.  $R_f = 0.3$ , **Eluent** = EtOAc : hexane (0.5 : 99.5), **Amount** = 41.2 mg, 0.092 mmol, **Selectivity** = 91 : 9.  $^1\text{H NMR}$  (400 MHz,  $\text{CDCl}_3$ )  $\delta$  9.85 (s, 1H), 7.58 (d,  $J = 7.9$  Hz, 2H), 7.17 (d,  $J = 7.9$  Hz, 2H), 6.85 (d,  $J = 7.3$  Hz, 1H), 6.77 (d,  $J = 3.1$  Hz, 2H), 6.77 – 6.75 (m, 2H), 6.74 (d, 2H), 6.52 (d,  $J = 5.0$  Hz, 2H), 6.50 (d,  $J = 2.0$  Hz, 2H), 3.64 (s, 6H), 2.18 (s, 3H), 1.95 (s, 3H).  $^{13}\text{C NMR}$  (126 MHz,  $\text{CDCl}_3$ )  $\delta$  192.1, 158.3, 158.2, 151.3, 141.1, 140.0, 139.0, 136.7, 136.3, 135.7, 135.2, 134.4, 132.3, 132.0, 131.9, 131.5, 131.1, 129.4, 126.5, 113.3, 113.1, 55.23, 55.20, 21.3, 20.2. **IR**(ATR/ $\text{cm}^{-1}$ ) 2951.6, 2925.6, 2842.4, 2730.6, 1698.7, 1599.9, 1519.3, 1454.3, 1295.8, 1214.8, 1171.0, 1035.9, 833.1, 794.1. **HRMS** (ESI)  $m/z$  calcd. for  $\text{C}_{31}\text{H}_{28}\text{NaO}_3$  ( $[\text{M}+\text{Na}]^+$ ) 471.1931, found  $m/z$  471.1937.

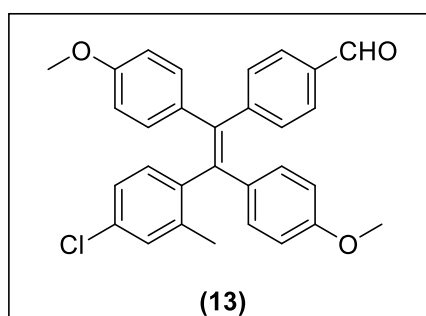

(*Z*)-4-(2-(4-chloro-2-methylphenyl)-1,2-bis(4-methoxyphenyl)vinyl)benzaldehyde (**13**) has been obtained as an orange solid in 81% yield.  $R_f = 0.3$ , **Eluent** = EtOAc : hexane (0.5 : 99.5), **Amount** = 38.0 mg, 0.081 mmol, **Selectivity** = 91 : 9.  $^1\text{H NMR}$  (400 MHz,  $\text{CDCl}_3$ )  $\delta$  9.86 (s, 1H), 7.59 (d,  $J = 7.9$  Hz, 2H), 7.17 (d,  $J = 8.5$  Hz, 2H), 6.97 (dt,  $J = 4.9, 2.1$  Hz, 2H), 6.89 (d,  $J = 9.2$  Hz, 1H), 6.76 (d,  $J = 5.5$  Hz, 2H), 6.74 (d,  $J = 4.9$  Hz, 2H), 6.55 (d,  $J = 5.5$  Hz, 2H), 6.53 (d,  $J = 4.9$  Hz, 2H), 3.65 (s, 6H), 1.96 (s, 3H).  $^{13}\text{C NMR}$  (126 MHz,  $\text{CDCl}_3$ )  $\delta$  192.0, 158.6, 158.6, 150.5, 144.6, 140.0, 139.4, 135.0, 134.9, 134.6, 132.2, 131.9, 131.8, 131.7, 131.2, 131.1, 129.4, 129.1, 113.5, 113.3, 55.21, 55.19, 19.7. **IR**(ATR/ $\text{cm}^{-1}$ ) 3050.4, 2954.2, 2936.0, 2834.6, 2741.0, 1701.3, 1599.9, 1511.5, 1290.6, 1241.2, 1171.0, 1030.7, 830.5, 736.9. **HRMS** (ESI)  $m/z$  calcd. for  $\text{C}_{30}\text{H}_{25}\text{ClNaO}_3$  ( $[\text{M}+\text{Na}]^+$ ) 491.1384, found  $m/z$  491.1391.

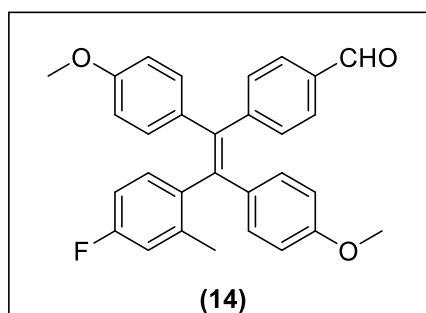

(Z)-4-(2-(4-fluoro-2-methylphenyl)-1,2-bis(4-methoxyphenyl)vinyl)benzaldehyde (**14**) has been obtained as a light green solid in 84% yield.  $R_f = 0.3$ , **Eluent** = EtOAc : hexane (0.5 : 99.5), **Amount** = 38.0 mg, 0.084 mmol, **Selectivity** = 92 : 8  $^1\text{H NMR}$  (500 MHz,  $\text{CDCl}_3$ )  $\delta$  9.87 (s, 1H), 7.60 (d,  $J = 8.4$  Hz, 2H), 7.17 (d,  $J = 8.2$  Hz, 2H), 6.91 (dd,  $J = 8.1, 5.8$  Hz, 1H), 6.77 (d,  $J = 5.8$  Hz, 2H), 6.75 (d,  $J = 5.8$  Hz, 2H), 6.72 – 6.68 (m, 2H), 6.54 (d,  $J = 4.3$  Hz, 2H), 6.53 (d,  $J = 4.4$  Hz, 2H), 3.65 (s, 6H), 1.96 (s, 3H).  $^{13}\text{C NMR}$  (126 MHz,  $\text{CDCl}_3$ )  $\delta$  192.0, 161.0 (d,  $J = 243.9$  Hz), 158.59, 158.57, 150.6, 144.6 (d,  $J = 7.5$  Hz), 139.8, 135.0, 134.6, 134.25, 132.23 (d,  $J = 2.9$  Hz), 132.20, 132.0, 131.9, 131.8, 131.6 (d,  $J = 8.1$  Hz), 129.5, 118.0 (d,  $J = 20.8$  Hz), 114.0 (d,  $J = 20.8$  Hz), 113.5, 113.3, 55.3, 55.2, 19.5.  $^{19}\text{F NMR}$  (471 MHz,  $\text{CDCl}_3$ )  $\delta$  -118.3. **IR**(ATR/ $\text{cm}^{-1}$ ) 2969.8, 2907.4, 2837.2, 2730.7, 1696.1, 1599.9, 1293.2, 1249.0, 1168.4, 1025.5, 827.9, 783.7. **HRMS** (ESI)  $m/z$  calcd. for  $\text{C}_{30}\text{H}_{25}\text{FNaO}_3$  ( $[\text{M}+\text{Na}]^+$ ) 475.1680, found  $m/z$  475.1659.

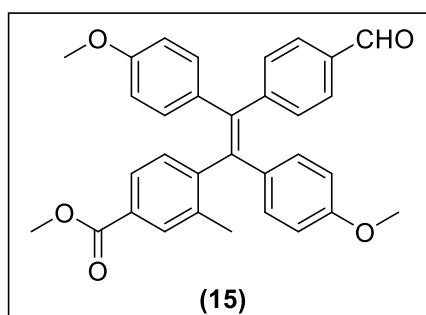

methyl (Z)-4-(2-(4-formylphenyl)-1,2-bis(4-methoxyphenyl)vinyl)-3-methylbenzoate (**15**) has been obtained as a yellow solid in 67% yield.  $R_f = 0.3$ , **Eluent** = EtOAc : hexane (1 : 99), **Amount** = 33.0 mg, 0.067 mmol, **Selectivity** = 88 : 12  $^1\text{H NMR}$  (400 MHz,  $\text{CDCl}_3$ )  $\delta$  9.86 (s, 1H), 7.68 – 7.61 (m, 2H), 7.61 – 7.58 (m, 2H), 7.18 (d,  $J = 4.3$  Hz, 2H), 7.06 (d,  $J = 8.5$  Hz, 1H), 6.74 (d, 2H), 6.72 (d, 2H), 6.52 (d,  $J = 6.1$  Hz, 2H), 6.50 (d,  $J = 6.7$  Hz, 2H), 3.80 (s, 3H), 3.64 (s, 3H), 3.63 (s, 3H), 2.04 (s, 3H).  $^{13}\text{C NMR}$  (101 MHz,  $\text{CDCl}_3$ )  $\delta$  192.0, 167.3, 158.6, 150.4, 148.1, 140.0, 137.0, 134.9, 134.6, 134.1, 132.2, 132.0, 131.9, 131.7, 129.5, 128.7, 126.9, 113.5, 113.3, 55.2, 52.1, 20.3. **IR**(ATR/ $\text{cm}^{-1}$ ) 2951.6, 2920.4, 2837.2, 2738.4, 1693.5, 1599.9, 1506.3, 1438.7, 1293.4, 1249.0, 1163.2, 1106.0, 1038.5, 827.9, 786.3. **HRMS** (ESI)  $m/z$  calcd. for  $\text{C}_{32}\text{H}_{28}\text{NaO}_5$  ( $[\text{M}+\text{Na}]^+$ ) 515.1829, found  $m/z$  515.1832.

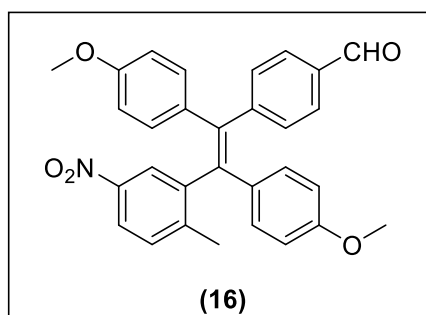

(Z)-4-(1,2-bis(4-methoxyphenyl)-2-(2-methyl-5-nitrophenyl)vinyl)benzaldehyde (**16**) has been obtained as an orange solid in 44% yield.  $R_f = 0.2$ , **Eluent** = EtOAc : hexane (1 : 99), **Amount** = 21.0 mg, 0.044 mmol, **Selectivity** = 87 : 13  $^1\text{H NMR}$  (400 MHz,  $\text{CDCl}_3$ )  $\delta$  9.87 (s, 1H), 7.90 – 7.84 (m, 2H), 7.62 (d,  $J = 7.9$  Hz, 2H), 7.19 (dd, 2H), 7.13 (s, 1H), 6.75 (d,  $J = 2.4$  Hz, 2H), 6.73 (d,  $J = 2.4$  Hz, 2H), 6.55 (d,  $J = 7.3$  Hz, 2H), 6.52 (d, 2H), 3.66 (s, 3H), 3.63 (s, 3H), 2.11 (s, 3H).  $^{13}\text{C NMR}$  (101 MHz,  $\text{CDCl}_3$ )  $\delta$  192.0, 158.8, 149.9, 146.3, 144.8, 144.4,

141.1, 138.6, 134.8, 134.4, 133.4, 132.1, 131.9, 131.8, 131.3, 129.5, 126.7, 122.0, 113.8, 113.6, 55.3, 20.6. **IR (ATR/cm<sup>-1</sup>)** 2951.6, 2928.2, 2839.8, 2741.0, 1696.1, 1599.9, 1508.9, 1345.3, 1241.2, 1171.0, 1030.7, 827.9, 807.1, 736.9. **HRMS (ESI)** m/z calcd. for C<sub>30</sub>H<sub>25</sub>NNaO<sub>5</sub> ([M+Na]<sup>+</sup>) 502.1625, found m/z 502.1679.

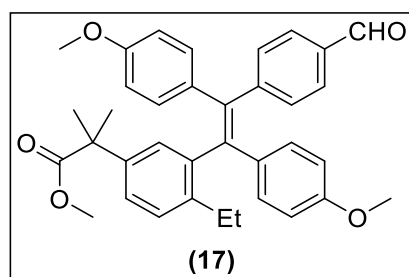

methyl (Z)-2-(4-ethyl-3-(2-(4-formylphenyl)-1,2-bis(4-methoxyphenyl)vinyl)phenyl)-2-methylpropanoate (**17**) has been obtained as a yellow solid in 85% yield. **R<sub>f</sub>** = 0.3, **Eluent** = EtOAc : hexane (0.5 : 99.5), **Amount** = 46.5 mg, 0.085 mmol, **Selectivity** = 95 : 5 **<sup>1</sup>H NMR (500 MHz, CDCl<sub>3</sub>)** δ 9.86 (s, 1H), 7.59 (d, *J* = 8.2 Hz, 2H), 7.18 (d, *J* = 6.3 Hz, 2H), 7.03 – 7.00 (m, 2H), 6.87 (s, 1H), 6.76 (d, *J* = 8.9 Hz, 2H), 6.71 (d, *J* = 8.9 Hz, 2H), 6.51 (d, *J* = 8.9 Hz, 2H), 6.49 (d, *J* = 8.9 Hz, 2H), 3.64 (s, 3H), 3.61 (s, 3H), 3.45 (s, 3H), 2.38 – 2.30 (m, 2H), 1.32 (s, 3H), 1.29 (s, 3H), 0.85 (t, *J* = 7.6 Hz, 3H). **<sup>13</sup>C NMR (126 MHz, CDCl<sub>3</sub>)** δ 192.1, 177.4, 158.4, 158.3, 150.8, 142.2, 141.8, 141.5, 141.1, 139.1, 135.5, 134.6, 134.4, 132.2, 132.0, 131.9, 129.7, 129.4, 128.5, 124.2, 113.3, 113.2, 55.2, 52.1, 46.0, 26.6, 26.3, 25.8, 14.3. **IR (ATR/cm<sup>-1</sup>)** 2964.6, 2928.2, 2855.4, 2735.9, 1729.9, 1698.7, 1602.5, 1506.3, 1464.8, 1288.0, 1243.8, 1176.2, 1150.2, 1025.5, 820.1, 773.3. **HRMS (ESI)** m/z calcd. for C<sub>36</sub>H<sub>36</sub>NaO<sub>5</sub> ([M+Na]<sup>+</sup>) 571.2455, found m/z 571.2460.

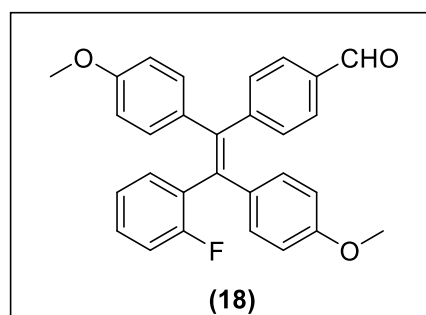

(Z)-4-(2-(2-fluorophenyl)-1,2-bis(4-methoxyphenyl)vinyl)benzaldehyde (**18**) has been obtained as light green solid compound in 53% yield. **Reaction time** = 48 h, **R<sub>f</sub>** = 0.4, **Eluent** = EtOAc : hexane (0.5 : 99.5), **Amount** = 23.3 mg, 0.053 mmol, **Selectivity** = 88 : 12. **<sup>1</sup>H NMR (500 MHz, CDCl<sub>3</sub>)** δ 9.85 (s, 1H), 7.58 (d, *J* = 8.5 Hz, 2H), 7.17 (d, *J* = 8.2 Hz, 2H), 7.10 – 7.04 (m, 1H), 7.02 – 6.97 (m, 1H), 6.90 – 6.87 (m, 1H), 6.84 (d, *J* = 2.3 Hz, 2H), 6.83 (d, *J* = 2.9 Hz, 2H), 6.82 – 6.78 (m, 1H), 6.56 (d, *J* = 3.2 Hz, 2H), 6.55 (d, *J* = 3.2 Hz, 2H), 3.65 (s, 3H), 3.65 (s, 3H). **<sup>13</sup>C NMR (126 MHz, CDCl<sub>3</sub>)** δ 192.1, 160.3 (d, *J* = 247.7 Hz), 158.62, 158.59, 150.3, 141.1, 135.3 (d, *J* = 14.7 Hz), 134.5 (d, *J* = 8.2 Hz), 132.9 (d, *J* = 4.1 Hz), 132.1, 131.9, 131.84, 131.81, 131.3 (d, *J* = 8.2 Hz), 129.4, 129.0 (d, *J* = 8.2 Hz), 123.9 (d, *J* = 4.1 Hz), 115.8 (d, *J* = 22.1 Hz), 113.5, 113.3, 55.2. **<sup>19</sup>F NMR (471 MHz, CDCl<sub>3</sub>)** δ -113.3. **IR (ATR/cm<sup>-1</sup>)** 3081.5, 3011.3, 2972.4, 2837.2, 2733.2, 1696.4, 1602.5, 1506.3, 1454.4, 1243.8, 1171.0, 1022.9, 822.7, 757.7. **HRMS (ESI)** m/z calcd. for C<sub>29</sub>H<sub>23</sub>FNao<sub>3</sub> ([M+Na]<sup>+</sup>) 461.1523, found m/z 461.1522.

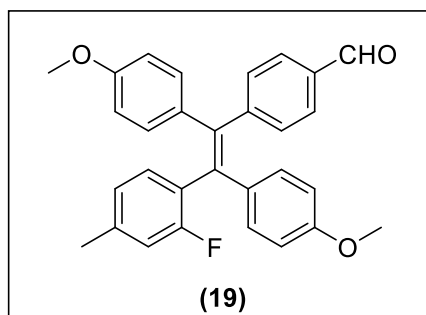

(*Z*)-4-(2-(2-fluoro-4-methylphenyl)-1,2-bis(4-methoxyphenyl)vinyl)benzaldehyde (**19**) has been obtained as a light yellowish green solid in 75% yield. **Reaction time** = 48 h, **R<sub>f</sub>** = 0.4, **eluent** = EtOAc : hexane (0.5 : 99.5), **Amount** = 34.0 mg, 0.075 mmol, **Selectivity** = 82 : 18 **<sup>1</sup>H NMR (500 MHz, CDCl<sub>3</sub>)** δ 9.83 (s, 1H), 7.56 (d, *J* = 8.5 Hz, 2H), 7.15 (d, *J* = 8.2 Hz, 2H), 6.87 (dd, *J* = 7.0, 1.8 Hz, 1H), 6.84 (d, *J* = 5.5 Hz, 2H), 6.82 (d, *J* = 5.6 Hz, 2H), 6.68 (dd, *J* = 7.8, 2.4 Hz, 1H), 6.61 (d, *J* = 8.9 Hz, 1H), 6.56 (d, *J* = 8.9 Hz, 2H), 6.54 (d, *J* = 8.9 Hz, 2H), 3.65 (s, 3H), 3.64 (s, 3H), 2.19 (s, 3H). **<sup>13</sup>C NMR (126 MHz, CDCl<sub>3</sub>)** δ 192.1, 160.13 (d, *J* = 247.3 Hz), 158.6, 158.5, 150.6, 140.8, 139.5 (d, *J* = 7.8 Hz), 135.48 (d, *J* = 3.2 Hz), 134.7, 134.4, 132.1, 131.9, 131.8, 131.3, 129.3, 128.31 (d, *J* = 15.2 Hz), 124.67 (d, *J* = 2.8 Hz), 116.30 (d, *J* = 21.6 Hz), 113.4, 113.3, 55.2, 21.2 (d, *J* = 1.3 Hz). **<sup>19</sup>F NMR (471 MHz, CDCl<sub>3</sub>)** δ -114.2. **IR (ATR/cm<sup>-1</sup>)** 2954.2, 2923.0, 2850.2, 2733.2, 1698.7, 1597.3, 1503.7, 1457.0, 1301.0, 1246.4, 1173.6, 1103.4, 1028.1, 830.5, 794.1. **HRMS (ESI)** *m/z* calcd. for C<sub>30</sub>H<sub>25</sub>FNao<sub>3</sub> ([M+Na]<sup>+</sup>) 475.1680, found *m/z* 475.1678.

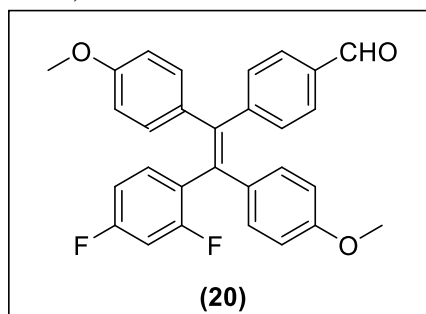

(*Z*)-4-(2-(2,4-difluorophenyl)-1,2-bis(4-methoxyphenyl)vinyl)benzaldehyde (**20**) has been obtained as a yellow solid in 67% yield. **Reaction time** = 48 h, **R<sub>f</sub>** = 0.3, **Eluent** = EtOAc : hexane (0.5 : 99.5), **Amount** = 30.5 mg, 0.067 mmol, **Selectivity** = 78 : 22 **<sup>1</sup>H NMR (500 MHz, CDCl<sub>3</sub>)** δ 9.85 (s, 1H), 7.57 (d, *J* = 8.4 Hz, 2H), 7.15 (d, *J* = 8.2 Hz, 2H), 6.97 – 6.93 (m, 1H), 6.83 (d, *J* = 2.1 Hz, 2H), 6.81 (d, *J* = 2.1 Hz, 2H), 6.62 – 6.60 (m, 1H), 6.59 (d, *J* = 2.4 Hz, 2H), 6.57 (d, *J* = 2.4 Hz, 2H), 6.55 – 6.54 (m, 1H), 3.67 (s, 3H), 3.66 (s, 3H). **<sup>13</sup>C NMR (126 MHz, CDCl<sub>3</sub>)** δ 192.0, 162.3 (dd, *J* = 248.2 Hz), 158.74, 158.70, 158.3 (dd, *J* = 253.3 Hz), 150.1, 141.5, 135.1, 134.6, 134.5, 134.2, 133.6 (dd, *J* = 9.5, 5.1 Hz), 132.0, 131.9, 131.8, 129.4, 127.6 (t, *J* = 18.9 Hz), 113.5, 113.4, 111.3 (dd, *J* = 21.0, 3.6 Hz), 104.2 (t, *J* = 25.7 Hz), 55.2. **<sup>19</sup>F NMR (471 MHz, CDCl<sub>3</sub>)** δ 111.6 (d, *J* = 7.8 Hz), 109.2 (d, *J* = 8.7 Hz). **IR (ATR/cm<sup>-1</sup>)** 2962.0, 2928.2, 2858.0, 2735.9, 1696.1, 1605.1, 1501.1, 1459.5, 1293.2, 1238.6, 1171.0, 1139.8, 1178.8, 1028.1, 960.5, 827.9, 791.5, 768.1, 744.7. **HRMS (ESI)** *m/z* calcd. for C<sub>29</sub>H<sub>22</sub>F<sub>2</sub>NaO<sub>3</sub> ([M+Na]<sup>+</sup>) 479.1429, found *m/z* 479.1422.

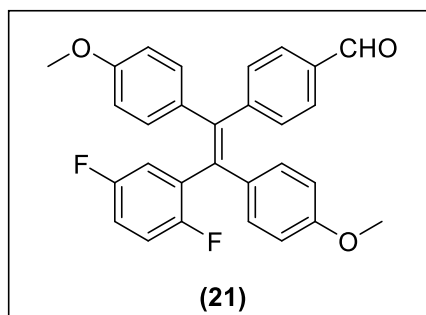

(*Z*)-4-(2-(2,5-difluorophenyl)-1,2-bis(4-methoxyphenyl)vinyl)benzaldehyde (**21**) has been obtained as a yellow solid in 47% yield. **Reaction time** = 48 h, **R<sub>f</sub>** = 0.3, **Eluent** = EtOAc : hexane (0.5 : 99.5), **Amount** = 21.5 mg, 0.047 mmol, **Selectivity** = 80 : 20 **<sup>1</sup>H NMR (500 MHz, CDCl<sub>3</sub>)** δ 9.85 (s, 1H), 7.58 (d, *J* = 8.4 Hz, 2H), 7.15 (d, *J* = 8.2 Hz, 2H), 6.89 – 6.86 (m, 1H), 6.85 (d, *J* = 8.2 Hz, 2H), 6.83 (d, *J* = 6.6 Hz, 2H), 6.77 – 6.74 (m, 2H), 6.59 (d, *J* = 9.0 Hz, 2H), 6.57 (d, *J* = 9.0 Hz, 2H), 3.67 (s, 3H), 3.66 (s, 3H). **<sup>13</sup>C NMR (126 MHz, CDCl<sub>3</sub>)** δ 192.0, 159.6 (dd, *J* = 243.2, 3.8 Hz), 158.9, 158.8, 156.3 (dd, *J* = 245.2, 3.3 Hz), 149.9, 141.9, 134.7, 133.8, 132.5, 132.0, 131.9, 131.8, 131.2, 129.4, 118.9 (dd, *J* = 23.8, 3.9 Hz), 116.7 (dd, *J* = 25.0, 9.0 Hz), 115.5 (dd, *J* = 23.9, 8.8 Hz), 114.0 (d, *J* = 3.4 Hz), 113.94, 113.92, 113.6, 113.5, 55.3. **<sup>19</sup>F NMR (471 MHz, CDCl<sub>3</sub>)** δ 101.0 (d, *J* = 17.3 Hz), 100.8 (d, *J* = 17.3 Hz). **IR (ATR/cm<sup>-1</sup>)** 2964.6, 2928.2, 2855.4, 2735.8, 1696.1, 1602.5, 1514.1, 1485.5, 1457.0, 1296.8, 1249.0, 1168.4, 1030.7, 820.1, 757.7, 734.3, 713.5. **HRMS (ESI)** *m/z* calcd. for C<sub>29</sub>H<sub>22</sub>F<sub>2</sub>NaO<sub>3</sub> ([M+Na]<sup>+</sup>) 479.1429, found *m/z* 479.1427.

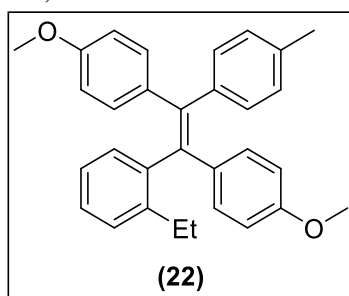

(*Z*)-4,4'-(1-(2-ethylphenyl)-2-(*p*-tolyl)ethene-1,2-diyl)bis(methoxybenzene) (**22**) has been obtained as a yellow solid in 96% yield. **R<sub>f</sub>** = 0.4, **Eluent** = EtOAc : hexane (0.5 : 99.5), **Amount** = 41.5 mg, 0.096 mmol, **Selectivity** = 91 : 9. The NMR data was found to be matched with the reported literature value.<sup>12</sup> **<sup>1</sup>H NMR (500 MHz, CDCl<sub>3</sub>)** δ 7.01 (d, *J* = 3.7 Hz, 2H), 6.95 (d, *J* = 7.3 Hz, 1H), 6.92 – 6.85 (m, 5H), 6.79 (d, *J* = 7.3 Hz, 2H), 6.77 (d, *J* = 7.3 Hz, 2H), 6.50 (d, *J* = 8.9 Hz, 2H), 6.46 (d, *J* = 8.9 Hz, 2H), 3.61 (s, 3H), 3.58 (s, 3H), 2.49 (dq, *J* = 15.0, 7.5 Hz, 1H), 2.33 (dq, *J* = 15.0, 7.5 Hz, 1H), 2.19 (s, 3H), 0.86 (t, *J* = 7.6 Hz, 3H). **<sup>13</sup>C NMR (126 MHz, CDCl<sub>3</sub>)** δ 157.9, 157.8, 143.1, 142.4, 141.1, 139.9, 138.4, 136.5, 136.1, 136.0, 132.01, 131.96, 131.9, 131.5, 128.6, 128.3, 126.9, 125.4, 113.0, 112.8, 55.2, 55.1, 26.0, 21.3, 14.5. **IR (ATR/cm<sup>-1</sup>)** 2959.4, 2928.2, 2873.6, 2842.4, 1607.7, 1508.9, 1467.3, 1298.4, 1246.4, 1176.2, 1111.2, 1025.5, 833.1, 812.3, 752.5.

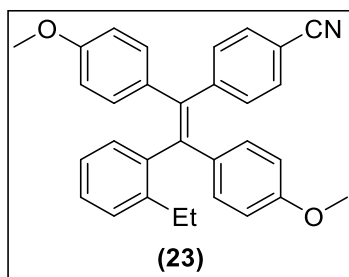

(*Z*)-4-(2-(2-ethylphenyl)-1,2-bis(4-methoxyphenyl)vinyl)benzotrile (**23**) has been obtained as a light green solid in 88% yield.  $R_f = 0.3$ , **Eluent** = EtOAc : hexane (1 : 99), **Amount** = 39.0 mg, 0.088 mmol, **Selectivity** = 94 : 6  $^1\text{H NMR}$  (500 MHz,  $\text{CDCl}_3$ )  $\delta$  7.34 (d,  $J = 8.5$  Hz, 2H), 7.11 (d,  $J = 8.5$  Hz, 2H), 7.06 – 7.02 (m, 2H), 6.95 – 6.91 (m, 2H), 6.75 (d,  $J = 8.9$  Hz, 2H), 6.72 (d,  $J = 8.9$  Hz, 2H), 6.52 (d,  $J = 8.9$  Hz, 2H), 6.50 (d,  $J = 8.9$  Hz, 2H), 3.64 (s, 3H), 3.61 (s, 3H), 2.46 (dq,  $J = 15.1, 7.6$  Hz, 1H), 2.32 (dq,  $J = 15.0, 7.6$  Hz, 1H), 0.86 (t,  $J = 7.6$  Hz, 3H).  $^{13}\text{C NMR}$  (126 MHz,  $\text{CDCl}_3$ )  $\delta$  158.5, 158.3, 149.3, 142.3, 142.1, 141.4, 138.3, 135.0, 134.8, 132.3, 132.1, 131.9, 131.7, 131.6, 128.5, 127.4, 125.6, 119.2, 113.4, 113.2, 109.8, 55.22, 55.16, 26.0, 14.4. **IR** (ATR/ $\text{cm}^{-1}$ ) 2959.4, 2928.2, 2839.8, 2223.8, 1605.1, 1511.5, 1462.2, 1246.4, 1241.2, 1173.6, 1160.0, 1022.9, 827.9, 749.9. **HRMS** (ESI)  $m/z$  calcd. for  $\text{C}_{31}\text{H}_{27}\text{NNaO}_2$  ( $[\text{M}+\text{Na}]^+$ ) 468.1934, found  $m/z$  468.1924.

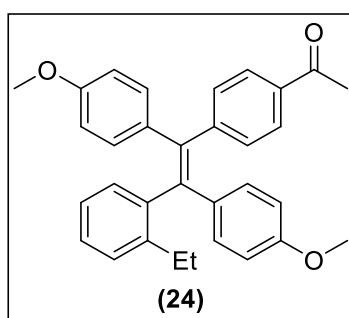

(*Z*)-1-(4-(2-(2-ethylphenyl)-1,2-bis(4-methoxyphenyl)vinyl)phenyl)ethan-1-one (**24**) has been obtained as an orange solid in 93% yield.  $R_f = 0.3$ , **Eluent** = EtOAc : hexane (1 : 99), **Amount** = 43.0 mg, 0.093 mmol, **Selectivity** = 93 : 7  $^1\text{H NMR}$  (500 MHz,  $\text{CDCl}_3$ )  $\delta$  7.67 (d,  $J = 8.5$  Hz, 2H), 7.10 (d,  $J = 8.5$  Hz, 2H), 7.07 – 7.02 (m, 2H), 6.98 – 6.92 (m, 2H), 6.77 (d,  $J = 8.9$  Hz, 2H), 6.74 (d,  $J = 9.0$  Hz, 2H), 6.51 (d,  $J = 7.0$  Hz, 2H), 6.49 (d,  $J = 6.9$  Hz, 2H), 3.63 (s, 3H), 3.61 (s, 3H), 2.48 (dq,  $J = 15.0, 7.5$  Hz, 1H), 2.47 (s, 3H), 2.33 (dq,  $J = 15.0, 7.5$  Hz, 1H), 0.87 (t,  $J = 7.6$  Hz, 3H).  $^{13}\text{C NMR}$  (126 MHz,  $\text{CDCl}_3$ )  $\delta$  198.0, 158.3, 158.2, 149.6, 142.5, 142.4, 140.6, 139.0, 135.6, 135.3, 135.0, 132.1, 131.9, 131.8, 131.7, 128.4, 128.1, 127.3, 125.5, 113.3, 113.1, 55.20, 55.15, 26.7, 26.0, 14.5. **IR** (ATR/ $\text{cm}^{-1}$ ) 2964.6, 2933.4, 2876.2, 2837.2, 1680.5, 1599.9, 1508.9, 1464.8, 1241.2, 1176.2, 1108.8, 1030.8, 952.7, 825.3, 729.1, 643.4. **HRMS** (ESI)  $m/z$  calcd. for  $\text{C}_{32}\text{H}_{30}\text{NaO}_3$  ( $[\text{M}+\text{Na}]^+$ ) 485.2087, found  $m/z$  485.2087.

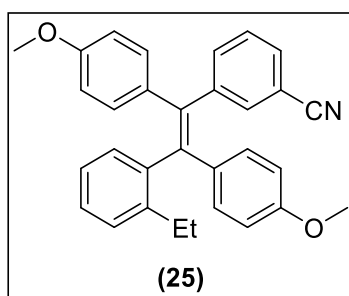

(*E*)-3-(2-(2-ethylphenyl)-1,2-bis(4-methoxyphenyl)vinyl)benzotrile (**25**) has been obtained as a light yellow solid in 86% yield.  $R_f = 0.3$ , **Eluent** = EtOAc : hexane (1 : 99), **Amount** = 38.2 mg, 0.086 mmol, **Selectivity** = 88 : 12  $^1\text{H NMR}$  (500 MHz,  $\text{CDCl}_3$ )  $\delta$  7.34 – 7.31 (m, 2H), 7.25 (dt,  $J = 7.9, 1.4$  Hz, 1H), 7.16 (d, 1H), 7.07 – 7.04 (m, 2H), 6.96 – 6.92 (m, 2H), 6.75 (d,  $J = 8.9$  Hz, 2H), 6.73 (d,  $J = 8.9$  Hz, 2H), 6.55 – 6.48 (m, 4H), 3.65 (s, 3H), 3.63 (s, 3H), 2.48 (dq,  $J = 14.8, 7.5$  Hz, 1H), 2.33 (dq,  $J = 14.8, 7.5$  Hz, 1H), 0.87 (t,  $J = 7.5$  Hz, 3H).  $^{13}\text{C NMR}$  (126 MHz,  $\text{CDCl}_3$ )  $\delta$  158.3, 158.2, 145.4, 142.2, 142.1, 140.9, 137.6, 136.0, 135.0, 134.9, 134.7, 132.0, 131.8, 131.5, 129.9, 128.6, 128.4, 127.3, 125.5, 118.9, 113.3, 113.1, 112.0, 55.13, 55.08, 25.9, 14.3. **IR** (ATR/ $\text{cm}^{-1}$ ) 2956.8, 2928.2, 2873.6, 2234.1, 1605.1, 1506.3, 1464.8, 1246.4, 1171.0, 1030.7, 830.5, 799.3, 734.3, 690.1. **HRMS** (ESI)  $m/z$  calcd. for  $\text{C}_{31}\text{H}_{27}\text{NNaO}_2$  ( $[\text{M}+\text{Na}]^+$ ) 468.1934, found  $m/z$  468.1932.

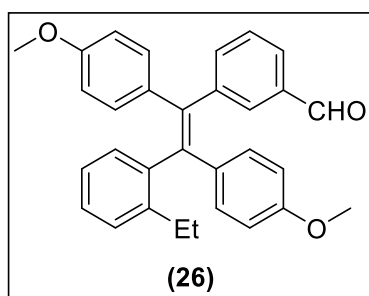

(*E*)-3-(2-(2-ethylphenyl)-1,2-bis(4-methoxyphenyl)vinyl)benzaldehyde (**26**) has been obtained as a light yellowish green solid in 82% yield.  $R_f = 0.3$ , **Eluent** = EtOAc : hexane (0.5 : 99.5), **Amount** = 37.0 mg, 0.082 mmol, **Selectivity** = 95 : 5  $^1\text{H NMR}$  (500 MHz,  $\text{CDCl}_3$ )  $\delta$  9.78 (s, 1H), 7.59 (dt,  $J = 7.6, 1.4$  Hz, 1H), 7.52 (t,  $J = 1.7$  Hz, 1H), 7.30 (dt,  $J = 7.6, 1.5$  Hz, 1H), 7.26 – 7.20 (m, 1H), 7.06 (dd,  $J = 5.9, 1.8$  Hz, 2H), 6.98 – 6.92 (m, 2H), 6.77 (d,  $J = 3.2$  Hz, 2H), 6.76 (d,  $J = 2.0$  Hz, 2H), 6.51 (d,  $J = 1.8$  Hz, 2H), 6.50 (s, 2H), 3.63 (s, 6H), 2.49 (dq,  $J = 15.0, 7.5$  Hz, 1H), 2.35 (dq,  $J = 15.1, 7.6$  Hz, 1H), 0.88 (t,  $J = 7.6$  Hz, 3H).  $^{13}\text{C NMR}$  (126 MHz,  $\text{CDCl}_3$ )  $\delta$  192.6, 158.23, 158.18, 145.3, 142.45, 142.37, 140.4, 138.6, 137.8, 136.4, 135.5, 135.2, 133.4, 132.1, 131.9, 131.7, 128.7, 128.5, 127.4, 125.6, 113.3, 113.1, 55.22, 55.19, 26.0, 14.4. **IR** (ATR/ $\text{cm}^{-1}$ ) 2962.0, 2933.4, 2834.6, 2725.5, 1696.1, 1602.5, 1508.9, 1459.6, 1290.6, 1241.2, 1171.0, 1113.8, 1033.3, 835.7, 794.1, 768.1, 752.5. **HRMS** (ESI)  $m/z$  calcd. for  $\text{C}_{31}\text{H}_{28}\text{NaO}_3$  ( $[\text{M}+\text{Na}]^+$ ) 471.1931, found  $m/z$  471.1930.

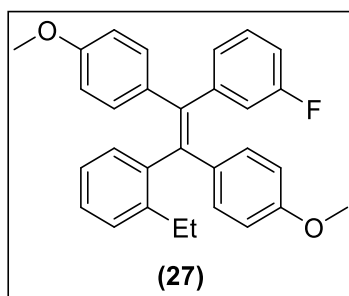

(*E*)-4,4'-(1-(2-ethylphenyl)-2-(3-fluorophenyl)ethene-1,2-diyl)bis(methoxybenzene) (**27**) has been obtained as a light yellow solid in 86% yield.  $R_f = 0.3$ , **Eluent** = EtOAc : hexane (0.5 : 99.5), **Amount** = 37.7 mg, 0.086 mmol, **Selectivity** = 96 : 4  $^1\text{H NMR}$  (500 MHz,  $\text{CDCl}_3$ )  $\delta$  7.17 – 7.12 (m, 3H), 7.09 – 7.03 (m, 2H), 6.94 – 6.88 (m, 5H), 6.88 – 6.83 (m, 2H), 6.64 (d,  $J = 8.9$  Hz, 2H), 6.62 (d,  $J = 9.0$  Hz, 2H), 3.75 (s, 3H), 3.73 (s, 3H), 2.61 (dq,  $J = 15.1, 7.6$  Hz, 1H), 2.46 (dq,  $J = 15.0, 7.5$  Hz, 1H), 1.00 (t,  $J = 7.6$  Hz, 3H).  $^{13}\text{C NMR}$  (126 MHz,  $\text{CDCl}_3$ )  $\delta$  162.6 (d,  $J = 245.4$  Hz), 158.15, 158.13, 146.3 (d,  $J = 7.4$  Hz), 142.6, 142.4, 139.8, 138.6 (d,

$J = 1.8$  Hz), 135.7, 135.4, 131.94, 131.89, 131.8, 129.2 (d,  $J = 8.3$  Hz), 128.4, 127.3 (d,  $J = 2.8$  Hz), 127.2, 125.5, 118.2 (d,  $J = 21.1$  Hz), 113.3 (d,  $J = 21.1$  Hz), 113.2, 113.0, 55.2, 55.1, 26.0, 14.5.  **$^{19}\text{F}$  NMR (471 MHz,  $\text{CDCl}_3$ )**  $\delta$  -114.0. **IR (ATR/ $\text{cm}^{-1}$ )** 2959.4, 2930.8, 2876.2, 2839.8, 1610.3, 1508.9, 1459.5, 1295.8, 1243.8, 1171.0, 1111.2, 1035.8, 830.5, 791.5, 744.2, 684.9. **HRMS (ESI)**  $m/z$  calcd. for  $\text{C}_{30}\text{H}_{27}\text{FNaO}_2$  ( $[\text{M}+\text{Na}]^+$ ) 461.1893, found  $m/z$  461.1883.

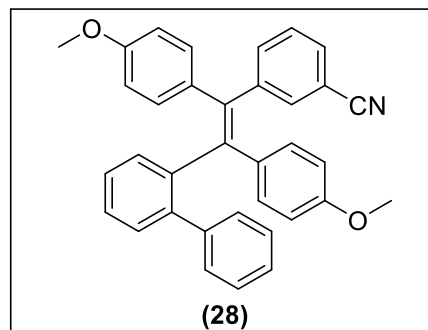

(*E*)-3-(2-([1,1'-biphenyl]-2-yl)-1,2-bis(4-methoxyphenyl)vinyl)benzonitrile (**28**) has been obtained as off colorless solid in 72% yield.  $R_f = 0.3$ , **Eluent** = EtOAc : hexane (1 : 99), **Amount** = 35.5 mg, 0.072 mmol, **Selectivity** = 88 : 12  **$^1\text{H}$  NMR (500 MHz,  $\text{CDCl}_3$ )**  $\delta$  7.28 – 7.25 (m, 1H), 7.17 – 7.14 (m, 3H), 7.11 – 7.06 (m, 7H), 6.99 (d,  $J = 8.4$  Hz, 2H), 6.82 (d,  $J = 8.9$  Hz, 2H), 6.52 (d,  $J = 8.9$  Hz, 2H), 6.38 (d,  $J = 8.9$  Hz, 2H), 6.22 (d,  $J = 8.9$  Hz, 2H), 3.67 (s, 3H), 3.65 (s, 3H).  **$^{13}\text{C}$  NMR (126 MHz,  $\text{CDCl}_3$ )**  $\delta$  158.4, 158.2, 146.0, 142.1, 141.7, 141.5, 139.3, 137.4, 135.8, 135.6, 134.80, 134.78, 132.8, 132.7, 132.3, 130.5, 129.9, 128.8, 128.6, 127.73, 127.67, 127.2, 126.6, 119.1, 113.4, 112.9, 112.0, 55.31, 55.29. **IR (ATR/ $\text{cm}^{-1}$ )** 3060.7, 3042.6, 3027.0, 2951.6, 2907.4, 2829.4, 2221.2, 1602.5, 1508.9, 1446.6, 1295.8, 1241.2, 1173.6, 1038.5, 838.3, 739.5, 697.9. **HRMS (ESI)**  $m/z$  calcd. for  $\text{C}_{35}\text{H}_{27}\text{NO}_2$  ( $[\text{M}]^+$ ) 493.2042, found  $m/z$  493.2015.

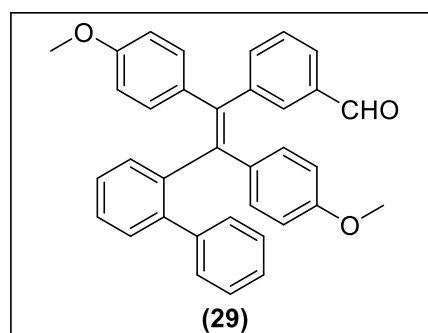

(*E*)-3-(2-([1,1'-biphenyl]-2-yl)-1,2-bis(4-methoxyphenyl)vinyl)benzaldehyde (**29**) has been obtained as a light yellow solid in 70% yield.  $R_f = 0.4$ , **Eluent** = EtOAc : hexane (0.5 : 99.5), **Amount** = 34.7 mg, 0.070 mmol, **Selectivity** = 90 : 10  **$^1\text{H}$  NMR (500 MHz,  $\text{CDCl}_3$ )**  $\delta$  9.73 (s, 1H), 7.53 – 7.51 (m, 1H), 7.37 (s, 1H), 7.17 – 7.14 (m, 4H), 7.12 – 7.06 (m, 5H), 7.02 (d,  $J = 8.4$  Hz, 2H), 6.83 (d,  $J = 8.7$  Hz, 2H), 6.49 (d,  $J = 8.9$  Hz, 2H), 6.37 (d,  $J = 9.5$  Hz, 2H), 6.27 (d,  $J = 8.9$  Hz, 2H), 3.65 (s, 3H), 3.64 (s, 3H).  **$^{13}\text{C}$  NMR (126 MHz,  $\text{CDCl}_3$ )**  $\delta$  192.5, 158.1, 145.7, 142.1, 142.0, 141.6, 138.7, 138.3, 137.4, 136.3, 136.0, 135.2, 133.2, 132.80, 132.78, 132.3, 130.5, 128.9, 128.5, 127.7, 127.5, 127.2, 127.1, 126.5, 113.2, 112.9, 55.29, 55.25. **IR (ATR/ $\text{cm}^{-1}$ )** 3055.5, 3026.9, 2954.2, 2938.6, 2910.0, 2834.6, 2730.6, 1693.5, 1599.9, 1503.7, 1467.3, 1285.4, 1238.6, 1173.6, 1028.8, 908.5, 835.7, 729.1, 695.3. **HRMS (ESI)**  $m/z$  calcd. for  $\text{C}_{35}\text{H}_{28}\text{NaO}_3$  ( $[\text{M}+\text{Na}]^+$ ) 519.1931, found  $m/z$  519.1962.



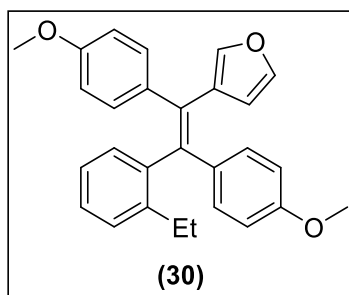

(*E*)-3-(2-(2-ethylphenyl)-1,2-bis(4-methoxyphenyl)vinyl)furan (**30**) has been obtained as off colorless solid in 77% yield.  $R_f = 0.4$ , **Eluent** = EtOAc : hexane (0.5 : 99.5), **Amount** = 31.6 mg, 0.077 mmol, **Selectivity** = 98 : 2  $^1\text{H NMR}$  (500 MHz,  $\text{CDCl}_3$ )  $\delta$  7.19 (d,  $J = 1.5$  Hz, 1H), 7.13 (d,  $J = 1.7$  Hz, 1H), 7.02 – 6.97 (m, 3H), 6.94 – 6.85 (m, 5H), 6.65 (d,  $J = 8.2$  Hz, 2H), 6.52 (d,  $J = 8.3$  Hz, 2H), 5.81 (s, 1H), 3.70 (s, 3H), 3.64 (s, 3H), 2.48 (dq,  $J = 15.0, 7.5$  Hz, 1H), 2.33 (dq,  $J = 15.0, 7.6$  Hz, 1H), 0.84 (t,  $J = 7.5$  Hz, 3H).  $^{13}\text{C NMR}$  (126 MHz,  $\text{CDCl}_3$ )  $\delta$  158.4, 158.2, 143.4, 142.7, 142.3, 141.9, 139.0, 136.0, 135.4, 131.74, 131.72, 131.5, 130.8, 128.3, 128.1, 126.9, 125.3, 113.4, 112.9, 112.6, 55.3, 55.2, 26.1, 14.5. **IR** (ATR/ $\text{cm}^{-1}$ ) 2964.8, 2928.2, 2967.4, 2834.6, 1599.9, 1503.7, 1459.5, 1288.0, 1236.0, 1173.6, 1150.0, 1030.7, 835.7, 791.5, 778.5, 747.3 **HRMS** (ESI)  $m/z$  calcd. for  $\text{C}_{28}\text{H}_{26}\text{NaO}_3$  ( $[\text{M}+\text{Na}]^+$ ) 433.1774, found  $m/z$  433.1831.

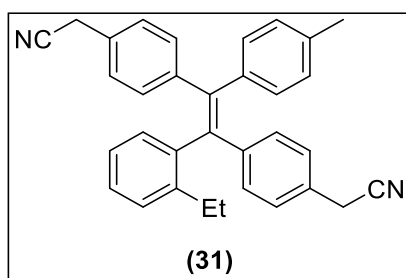

(*Z*)-2,2'-((1-(2-ethylphenyl)-2-(*p*-tolyl)ethene-1,2-diyl)bis(4,1-phenylene))diacetonitrile (**31**) has been obtained as a yellow solid in 72% yield.  $R_f = 0.2$ , **Eluent** = EtOAc : hexane (5 : 95), **Amount** = 32.5 mg, 0.072 mmol, **Selectivity** = 99 : 1  $^1\text{H NMR}$  (500 MHz,  $\text{CDCl}_3$ )  $\delta$  7.08 – 7.02 (m, 2H), 6.95 – 6.82 (m, 14H), 3.55 (s, 2H), 3.51 (s, 2H), 2.45 (dq,  $J = 15.1, 7.6$  Hz, 1H), 2.33 (dq,  $J = 15.0, 7.5$  Hz, 1H), 2.22 (s, 3H), 0.85 (t,  $J = 7.6$  Hz, 3H).  $^{13}\text{C NMR}$  (126 MHz,  $\text{CDCl}_3$ )  $\delta$  143.5, 143.0, 142.3, 142.0, 141.1, 139.8, 139.5, 136.8, 131.7, 131.4, 131.3, 131.2, 128.9, 128.5, 127.9, 127.7, 127.5, 127.3, 127.1, 125.6, 118.0, 117.9, 26.0, 23.4, 23.3, 21.3, 14.4. **IR** (ATR/ $\text{cm}^{-1}$ ) 3019.2, 2964.6, 2871.0, 2254.9, 1677.9, 1599.9, 1511.5, 1415.4, 1256.8, 1178.8, 1116.4, 1020.3, 913.7, 817.5, 721.3. **HRMS** (ESI)  $m/z$  calcd. for  $\text{C}_{33}\text{H}_{28}\text{N}_2\text{Na}$  ( $[\text{M}+\text{Na}]^+$ ) 475.2145, found  $m/z$  475.2155.

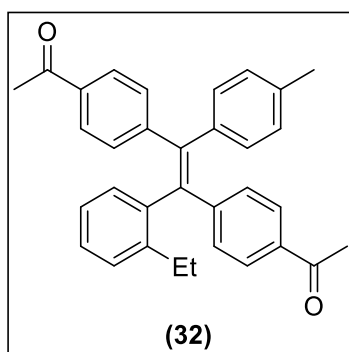

(*Z*)-1,1'-((1-(2-ethylphenyl)-2-(*p*-tolyl)ethene-1,2-diyl)bis(4,1-phenylene))bis(ethan-1-one) (**32**) has been obtained as a yellow solid in 67% yield.  $R_f = 0.2$ , **Eluent** = EtOAc : hexane (5 : 95), **Amount** = 30.7 mg, 0.067 mmol, **Selectivity** = 99 : 1  $^1\text{H NMR}$  (500 MHz,  $\text{CDCl}_3$ )  $\delta$  7.61 – 7.56 (m, 4H), 7.08 – 7.04 (m, 2H), 7.01 – 6.96 (m, 4H), 6.93 – 6.89 (m, 4H), 6.84 (d,  $J = 8.1$  Hz, 2H), 2.53 – 2.39 (m, 1H), 2.43 (d,  $J = 12.8$  Hz, 6H), 2.40 – 2.29 (m, 1H), 2.23 (s, 3H), 0.85 (t, 3H).  $^{13}\text{C NMR}$  (126 MHz,  $\text{CDCl}_3$ )  $\delta$  197.9, 197.8, 148.5, 148.1, 142.4, 142.2, 141.4, 140.5, 139.3, 137.3, 135.3, 135.1, 131.8, 131.3, 131.0, 130.9, 129.1, 128.7, 127.93, 127.91, 127.7, 125.8, 26.7, 26.6, 26.1, 21.4, 14.4. **IR** (ATR/ $\text{cm}^{-1}$ ) 2964.6, 2925.6, 2855.4, 1677.9, 1602.5, 1506.3, 1399.8, 1358.2, 1256.8, 1178.8, 1116.4, 1017.7, 955.3, 825.3, 782.3, 782.5, 703.1. **HRMS** (ESI)  $m/z$  calcd. for  $\text{C}_{33}\text{H}_{30}\text{NaO}_2$  ( $[\text{M}+\text{Na}]^+$ ) 481.2138, found  $m/z$  481.2152.

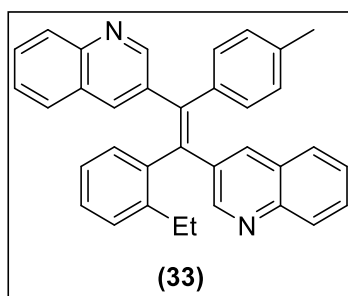

(*E*)-3,3'-((1-(2-ethylphenyl)-2-(*p*-tolyl)ethene-1,2-diyl)diquinoline) (**33**) has been obtained as a light yellow solid in 65% yield.  $R_f = 0.2$ , **Eluent** = EtOAc : hexane (5 : 95), **Amount** = 31.0 mg, 0.065 mmol, **Selectivity** = 99 : 1  $^1\text{H NMR}$  (500 MHz,  $\text{CDCl}_3$ )  $\delta$  8.54 (s, 1H), 8.47 (s, 1H), 7.89 (d,  $J = 8.4$  Hz, 1H), 7.84 (s, 1H), 7.81 (d,  $J = 8.3$  Hz, 1H), 7.66 (d,  $J = 2.3$  Hz, 1H), 7.57 (t,  $J = 1.5$  Hz, 1H), 7.55 – 7.48 (m, 2H), 7.47 (d,  $J = 8.1$  Hz, 1H), 7.38 (t, 1H), 7.34 (t,  $J = 7.5$  Hz, 1H), 7.19 – 7.09 (m, 2H), 7.11 – 7.05 (m, 1H), 7.01 (t,  $J = 1.7$  Hz, 1H), 6.83 (s, 4H), 2.54 – 2.40 (m, 2H), 2.18 (s, 3H), 0.89 (t,  $J = 7.5$  Hz, 3H).  $^{13}\text{C NMR}$  (126 MHz,  $\text{CDCl}_3$ )  $\delta$  153.1, 152.7, 146.9, 146.4, 142.3, 141.6, 140.1, 139.5, 138.5, 138.3, 137.3, 137.2, 136.2, 136.0, 131.9, 130.7, 129.8, 129.6, 129.4, 129.2, 128.72, 127.70, 127.96, 128.93, 127.90, 127.85, 127.8, 127.0, 126.9, 126.0, 26.2, 21.3, 14.4. **IR** (ATR/ $\text{cm}^{-1}$ ) 3058.2, 3021.8, 2964.6, 2925.6, 2855.4, 1716.9, 1576.9, 1490.8, 1459.6, 1020.3, 788.3, 744.7. **HRMS** (ESI)  $m/z$  calcd. for  $\text{C}_{35}\text{H}_{28}\text{N}_2\text{Na}$  ( $[\text{M}]^+$ ) 477.2325, found  $m/z$  477.2328.

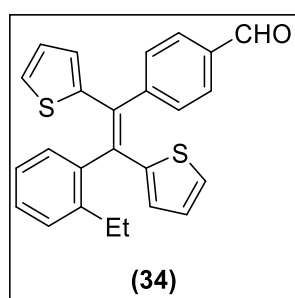

(*E*)-4-(2-(2-ethylphenyl)-1,2-di(thiophen-2-yl)vinyl)benzaldehyde (**34**) has been obtained as a yellowish green solid in 87% yield.  $R_f = 0.4$ , **Eluent** = EtOAc : hexane (0.5 : 99.5), **Amount** = 34.8 mg, 0.087 mmol, **Selectivity** = 80 : 20  $^1\text{H NMR}$  (500 MHz,  $\text{CDCl}_3$ )  $\delta$  10.04 (s, 1H), 7.91 (d,  $J = 8.1$  Hz, 2H), 7.54 (d,  $J = 8.1$  Hz, 2H), 7.37 (dt,  $J = 8.5, 4.3$  Hz, 1H), 7.31 (d,  $J = 7.6$  Hz, 1H), 7.23 (d,  $J = 4.1$  Hz, 2H), 6.98 (dd,  $J = 7.8, 5.0$  Hz, 2H), 6.63 (dt,  $J = 9.8, 4.4$  Hz, 2H), 6.22 (dd,  $J = 13.7, 3.9$  Hz, 2H), 2.61 – 2.46 (m,  $J = 7.7$  Hz, 2H), 1.03 (t,  $J = 7.6$  Hz, 3H).  $^{13}\text{C NMR}$  (126 MHz,  $\text{CDCl}_3$ )  $\delta$  192.1, 148.6, 145.0, 144.6, 143.3, 140.2, 136.1, 132.4, 132.1, 132.0, 131.1, 130.5, 129.9, 129.14, 119.10, 129.0, 127.6, 127.2, 126.9, 126.2, 125.9, 25.7, 14.2.

**IR (ATR/cm<sup>-1</sup>)** 3107.6, 3071.1, 3091.2, 2964.6, 2923.0, 2876.2, 2837.2, 2730.7, 1693.5, 1602.5, 1566.1, 1386.7, 1204.8, 1163.2, 817.5, 744.7, 700.5. **HRMS (ESI) m/z calcd.** for C<sub>25</sub>H<sub>21</sub>OS<sub>2</sub> ([M+H]<sup>+</sup>) 401.1028 found m/z 401.1011.

### **Section SM-IX: Practical usability of Pd@PKPOP**

#### General procedure for the scale-up reaction

To a 100 mL Schlenk tube equipped with a magnetic stirrer bar, **Pd@PKPOP** (60.0 mg, 0.5 mol% Pd), 1,2-bis(4-methoxyphenyl)ethyne **A1** (715 mg, 3.0 mmol), 4-formylphenylboronic acid **B4** (675 mg, 4.5 mmol), 2-ethyliodobenzene **I2** (1392 mg, 6.0 mmol) and Na<sub>2</sub>CO<sub>3</sub> (636 mg, 6.0 mmol) were taken under inert atmosphere. Dried DMF (30.0 mL) was then added, and the tube was stoppered tightly and kept in a pre-heated (110 °C) oil bath at 250 ppm stirring. After 24 h, the oil bath was removed, and the mixture was cooled to rt. The reaction mixture was transferred into a centrifuge tube, and the catalyst was centrifuged. The mother liquor was then mixed with brine (150 mL) and extracted using ethyl acetate (3 x 60 mL). The organic layer was washed with distilled water (150 mL) and dried over anhydrous Na<sub>2</sub>SO<sub>4</sub>. Further, the organic layer was evaporated under reduced pressure, and a slurry was made. The slurry was packed into a silica gel column and eluted using ethyl acetate and hexane (0.5 : 99.5). The final product was obtained after reducing the eluent under a rota-evaporator. Finally, it was crystallized in the ethyl acetate and hexane solution mixture to get 1.20 g of the light yellowish-green solid product with 89% yield and 92 : 08 selectivity.

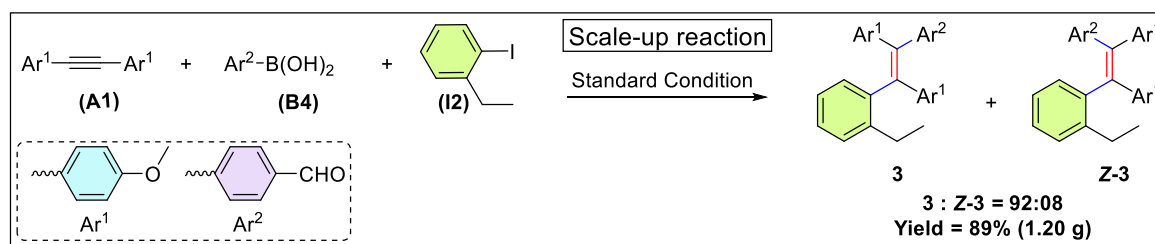

**Figure S30:** Scale-up reaction

#### General procedure for recyclability test

To a 16 mL culture tube equipped with magnetic stirrer bar, **Pd@PKPOP** (2.0 mg), 1,2-bis(4-methoxyphenyl)ethyne **A1** (0.1 mmol), 4-formylphenylboronic acid **B4** (0.15 mmol), 2-ethyliodobenzene **I2** (0.2 mmol), Na<sub>2</sub>CO<sub>3</sub> (0.2 mmol) and 1,3,5-trimethoxybenzene (0.1 mmol) were taken under inert atmosphere. Dried DMF (1.0 mL) was then added, and the tube was stoppered tightly and kept in a pre-heated (110 °C) oil bath at 250 ppm stirring. After 24 h, the oil bath was removed, and the mixture was cooled to rt. The reaction mixture was transferred into a centrifuge tube, and the catalyst was centrifuged. The mother liquor was taken out using a syringe under an inert atmosphere. The reaction mixture was analyzed using <sup>1</sup>H NMR to obtain yield and selectivity by following the initially described standard workup and NMR sample preparation procedure. The fresh batch of reactants, internal standard, base, and solvent were transferred into the same culture tube used above, maintaining an inert atmosphere. Again, the reaction was run for another 24 h. The above protocols were repeated for 7 times to get the recyclability result.

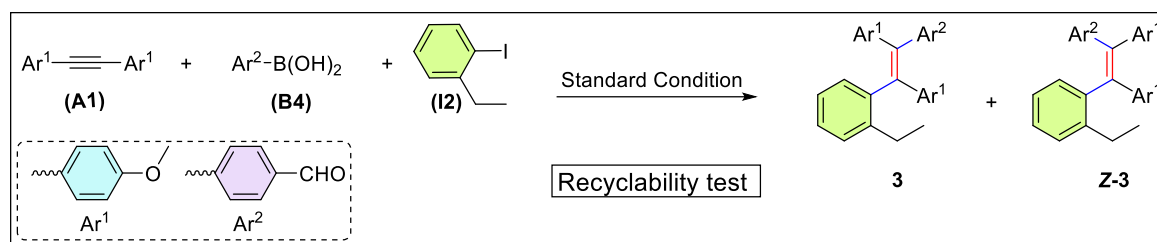

**Figure S31:** Schematic protocol for recyclability test

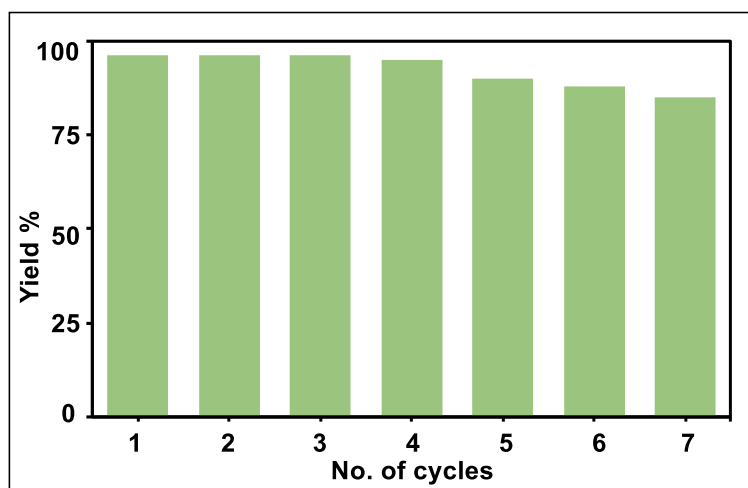

**Figure S32:** Recyclability test graph shows that **Pd@PKPOP** maintains high activity up to 7<sup>th</sup> cycle

#### General procedure for calculating turnover number (TON) and turnover frequency (TOF)

To a 16 mL culture tube equipped with magnetic stirrer bar, **Pd@PKPOP** (0.5 mg, 0.025 mol% Pd), 1,2-bis(4-methoxyphenyl)ethyne **A1** (0.5 mmol), 4-formylphenylboronic acid **B4** (0.75 mmol), 2-ethyliodobenzene **I2** (1.0 mmol),  $\text{Na}_2\text{CO}_3$  (1.0 mmol) and 1,3,5-trimethoxybenzene as internal standard (0.5 mmol) were taken under inert atmosphere. Dried DMF (5.0 mL) was then added, and the tube was stoppered tightly and kept in a pre-heated (110 °C) oil bath at 250 ppm stirring. After 60 h, the oil bath was removed, and the mixture was cooled to rt. 1 mL aliquot was taken into 5 mL glass vial and mixed with 1 mL  $\text{H}_2\text{O}$  and 2 mL ethyl acetate. It was shaken well and kept for the layer to be separated. 1 mL aliquot of separated ethyl acetate was dried under anhydrous  $\text{Na}_2\text{SO}_4$ . The ethyl acetate was evaporated.  $^1\text{H}$  NMR analysis determines 65% yield of the product.

#### Calculation of TON

$$\begin{aligned} \text{TON} &= \text{mol of desired product} / \text{mol of Pd used} \\ &= (0.3250 \text{ mmol product}) / (0.1269 \times 10^{-3} \text{ mmol Pd}) \\ &= 2561 \\ &> 2500 \end{aligned}$$

#### Calculation of TOF

$$\begin{aligned} \text{TOF} &= \text{TON} / \text{time} \\ &= 2561 / 60 \text{ h} \\ &= 42.7 \end{aligned}$$

### Quantifying the amount of Pd in Pd@PKPOP after catalysis

2 mg catalyst has been digested in 2 mL piranha solution for 30 h. It was diluted with 8 mL Milli-Q water. 1 mL aliquot was again taken and diluted with 9 mL 2% concentrated HNO<sub>3</sub>. 2 ml of the final solution was filtered with 0.2 μm syringe filter, and measurement was carried out on ICP-OES. Commercially available Pd (1000 ppm Pd in 10% HCl) solution has been used as standard. After calculation, we got the following result.

| Catalysts                        | Expt. Found Pd (wt %) | Theoretically PdCl <sub>2</sub> taken (wt %) |
|----------------------------------|-----------------------|----------------------------------------------|
| Pd@PKPOP                         | 2.70                  | 6                                            |
| Pd@PKPOP (1 <sup>st</sup> cycle) | 2.41                  | -                                            |
| Pd@PKPOP (7 <sup>th</sup> cycle) | 0.28                  | -                                            |

**Table ST12** : Quantity of Pd in different catalysts quantified by ICP-OES. Wt % was calculated with respect to **PKPOP**. So, 2.0 mg 6 wt % **Pd@PKPOP** contains 0.054 mg Pd ( $0.5074 \times 10^{-3}$  mmol)

### General procedure for hot filtration test

To a 16 mL culture tube equipped with magnetic stirrer bar, **Pd@PKPOP** (2.0 mg, 0.5 mol% Pd), 1,2-bis(4-methoxyphenyl)ethyne **A1** (0.1 mmol), 4-formylphenylboronic acid **B4** (0.15 mmol), 2-ethyliodobenzene **I2** (0.2 mmol), Na<sub>2</sub>CO<sub>3</sub> (0.2 mmol) and 1,3,5-trimethoxybenzene as internal standard (0.1 mmol) were taken under inert atmosphere. Dried DMF (1.0 mL) was then added, and the tube was stoppered tightly and kept in a pre-heated (110 °C) oil bath at 250 ppm stirring.

After 12 h, 0.5 mL reaction mixture was taken out via a syringe and filtered through 0.2 μm syringe filter into a new 16 mL culture tube equipped with a magnetic bar under an inert atmosphere. This changed reaction setup was again allowed to run for another 12 h at 110 °C.

100 μL aliquot was taken from both batches and analyzed through GCMS according to the workup and sample preparation procedure described.

Note: A GCMS calibration was made by taking an equal amount of the product **3** and 1,3,5-trimethoxybenzene. After optimal dilution, 3 batches were measured, and the ratio of average retention time of internal standard with the product was calculated.

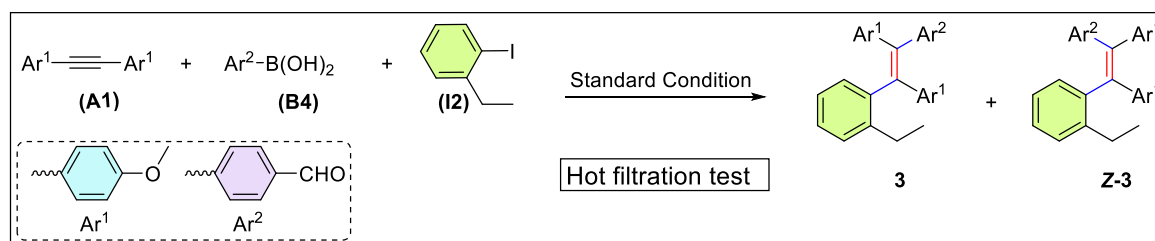

**Figure S33:** Schematic protocol for hot filtration test

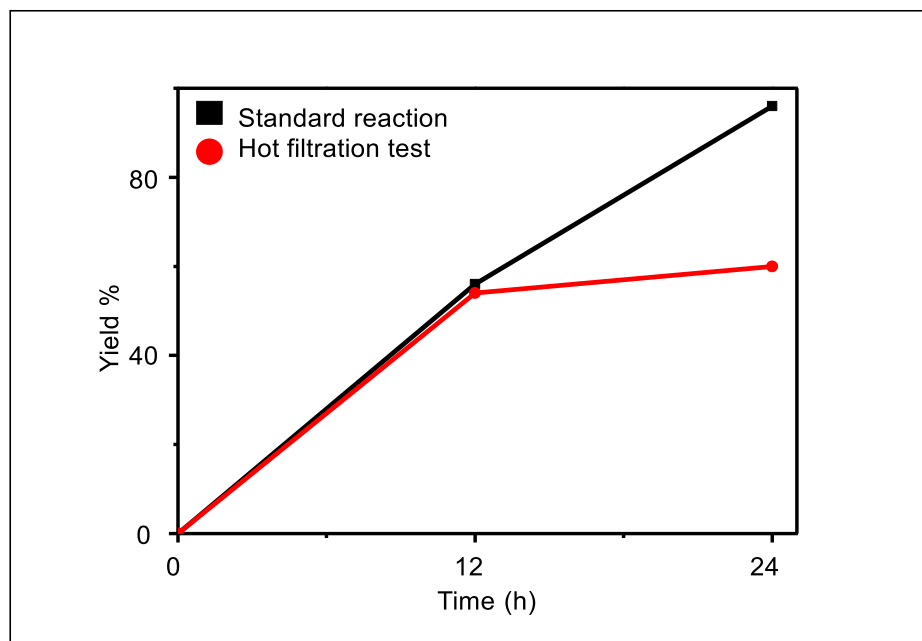

**Figure S34:** Hot filtration test to probe the heterogeneity showing yield obtained in 12 h up to 54% and after filtering catalyst, 6% yield obtained in next 12 h

**Section SM-X: Characterization of Pd@PKPOP after catalysis**

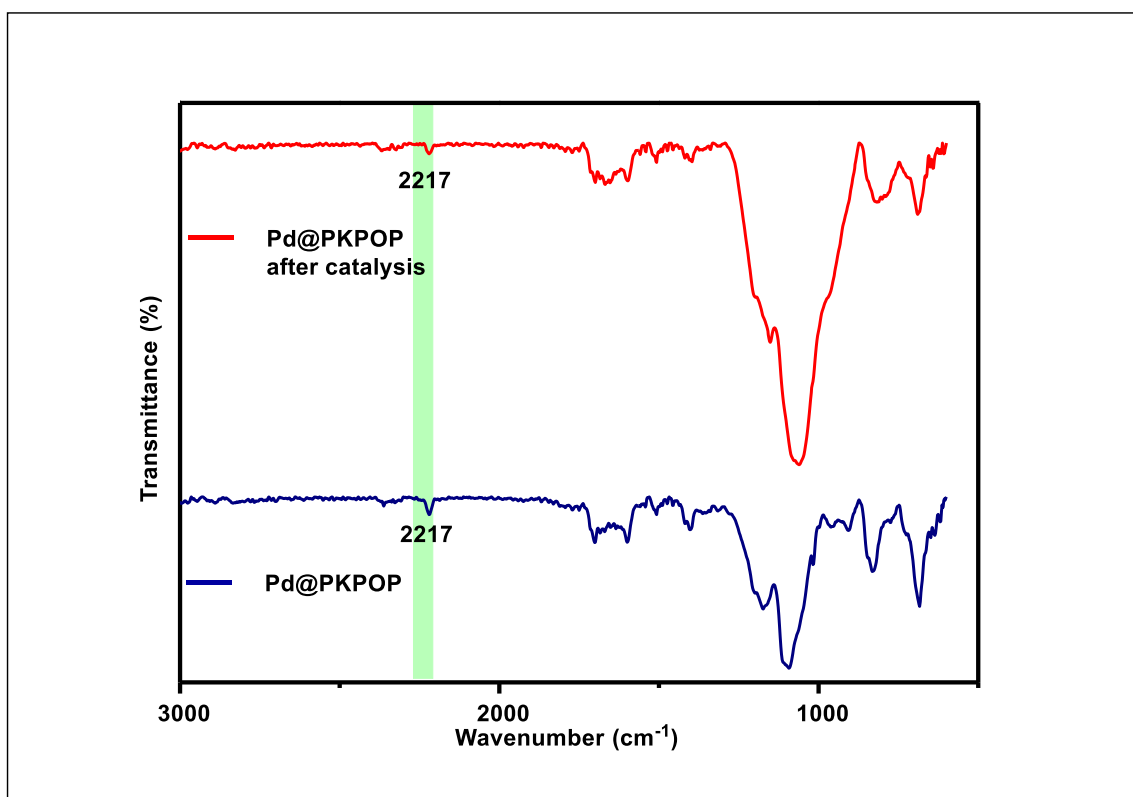

**Figure S35:** FT-IR spectra of Pd@PKPOP before and after catalysis

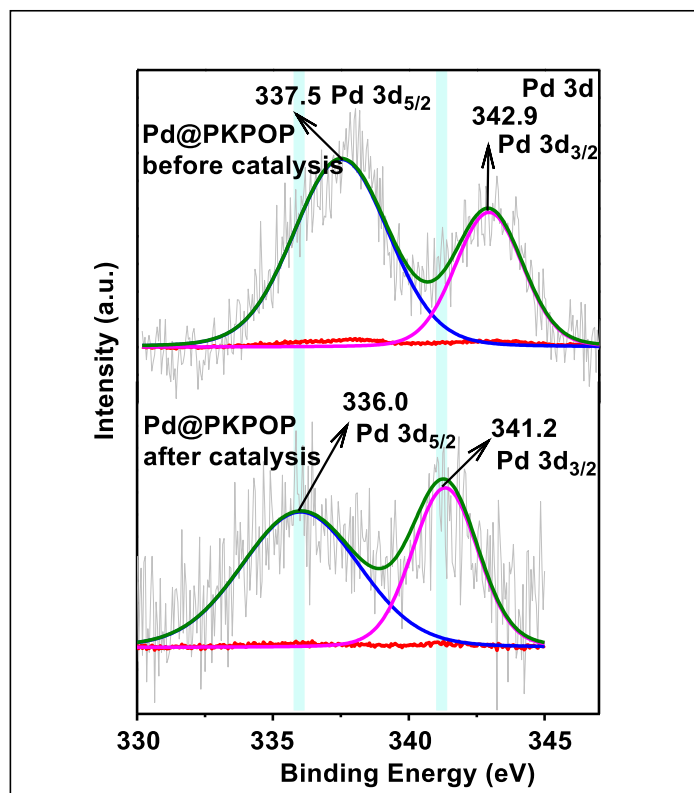

**Figure S36:** Comparative Pd ( $3d_{5/2}$ ) and ( $3d_{3/2}$ ) XPS spectra of **Pd@PKPOP** before and after catalysis. Pd(0) in the form of nanoparticles is deconvoluted after catalysis

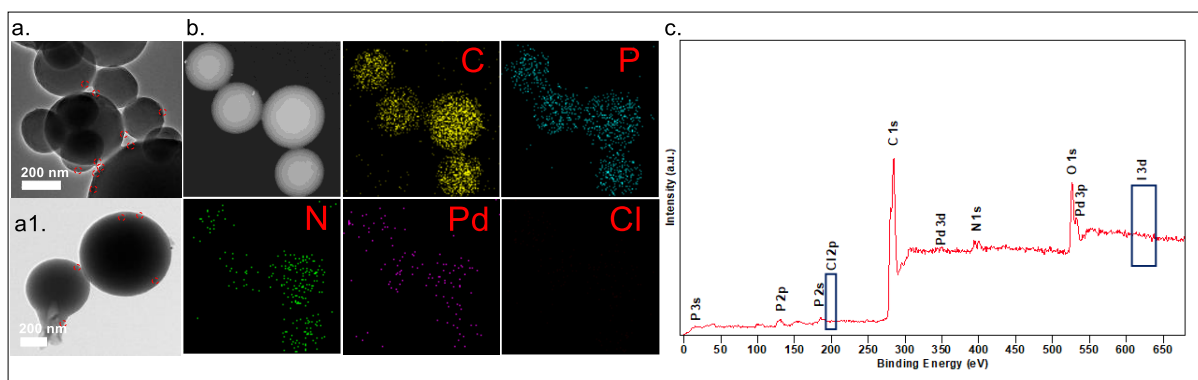

**Figure S37:** (a.) TEM image of **Pd@PKPOP** after catalysis (1<sup>st</sup> cycle) with unchanged morphology containing Pd nanoparticles; (a1.) TEM images with burst morphology (after 7<sup>th</sup> cycle); (b.) Elemental analysis of **Pd@PKPOP** after catalysis through EDAX. Cl is absent after catalysis; (c.) XPS analysis also supported the absence of counter anion like Cl and I after catalysis

## Section SM-XI: Controlled experiments and mechanistic investigations

### General procedure for kinetic study

To a 16 mL culture tube equipped with magnetic stirrer bar, **Pd@PKPOP** (2.0 mg, 0.5 mol% Pd), 1,2-bis(4-methoxyphenyl)ethyne **A1** (0.1 mmol), 4-formylphenylboronic acid **B4** (0.15 mmol), 2-ethyliodobenzene **I2** (0.2 mmol), Na<sub>2</sub>CO<sub>3</sub> (0.2 mmol) and 1,3,5-trimethoxybenzene as internal standard (0.1 mmol) were taken under inert atmosphere. Dried DMF (1.0 mL) was then added, and the tube was capped with rubber septa, fitted with an argon-filled balloon, and kept in a pre-heated (110 °C) oil bath at 250 ppm stirring. After respective times (1 h, 2 h, 3 h, 4 h, 5 h, 6 h, 10 h, 15 h, 20 h, 25 h, and 30 h.), 90 μL of aliquot was taken into a vial and mixed it with 1 mL brine and 1 mL ethyl acetate. After working up via shaking, 100 μL aliquot of the organic phase was passed through Na<sub>2</sub>SO<sub>4</sub> and celite pad and mixed with 0.9 mL fresh ethyl acetate to make 1 mL GCMS samples and analyzed.

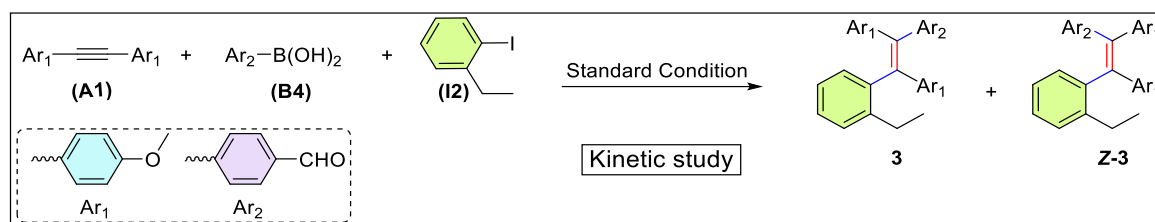

**Figure S38:** Schematic protocol for the kinetic study

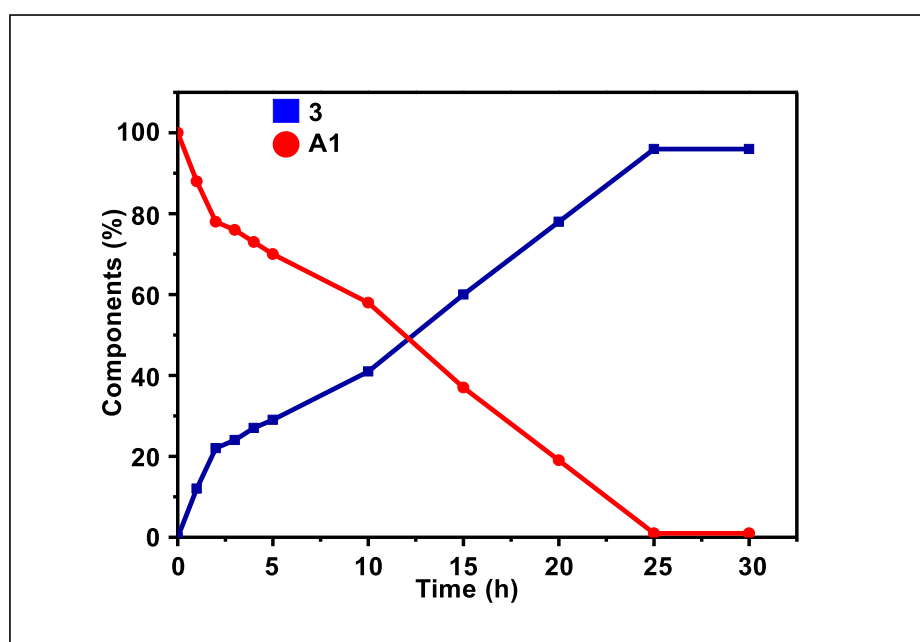

**Figure S39:** In the kinetic investigation, the blue line shows the formation of the product, and the red line shows the conversion of the internal alkynes against time

#### General procedure for comparative kinetic analysis with different catalysts

To six 16 mL culture tubes equipped with magnetic stirrer bar, **Pd@PKPOP** (2.0 mg), Pd@KAPs(Ph-PPh<sub>3</sub>) (2.0 mg), Pd@Phos-polymer (2.0 mg), 5% Pd/C (1.1 mg), PdCl<sub>2</sub> (0.09 mg) and PdCl<sub>2</sub>(PPh<sub>3</sub>)<sub>2</sub> (0.36 mg) were taken separately. 1,2-bis(4-methoxyphenyl)ethyne **A1** (0.1 mmol), 4-formylphenylboronic acid **B4** (0.15 mmol), 2-ethyliodobenzene **I2** (0.2 mmol), Na<sub>2</sub>CO<sub>3</sub> (0.2 mmol) and 1,3,5-trimethoxybenzene (0.1 mmol) were then subsequently introduced under inert atmosphere. Dried DMF (1.0 mL) was then added, and the tube was capped with rubber septa, fitted with an argon-filled balloon, and kept in a pre-heated (110 °C)



oil bath at 250 ppm stirring. After respective times (2 h, 3 h, 4 h, 8 h, 12 h, 24 h and 30 h.), 100  $\mu$ L of aliquot was taken into a vial and mixed with 1 mL brine and 1 mL ethyl acetate. After working up via shaking, 100  $\mu$ L aliquot of the organic phase was passed through  $\text{Na}_2\text{SO}_4$  and celite pad and mixed with 0.9 mL fresh ethyl acetate to make 1 mL GCMS samples and analyzed.

Note:- Solution of 5.0 mg  $\text{PdCl}_2$  was made into 2.0 mL dry DMF. 36.0  $\mu$ L of the solution was taken and used as the catalyst.

Note:- Solution of 5.0 mg  $\text{PdCl}_2(\text{PPh}_3)_2$  was made into 1.0 mL dry DMF. 72.0  $\mu$ L of the solution was taken out and used as the catalyst.

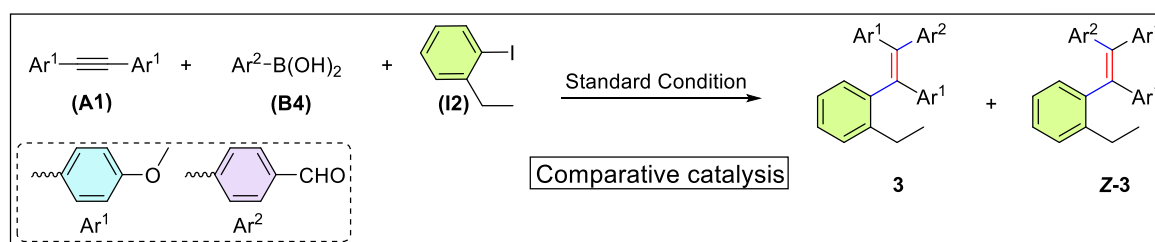

**Figure S40:** Schematic protocol for comparative catalysis

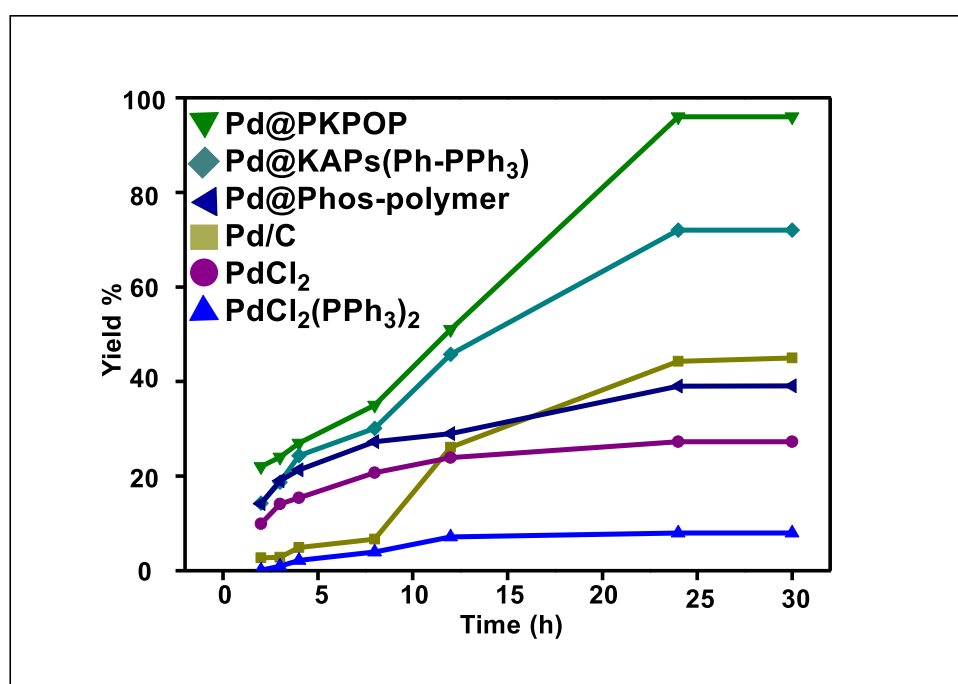

**Figure S41:** Comparative rate of product formation in different heterogeneous and homogeneous catalysts

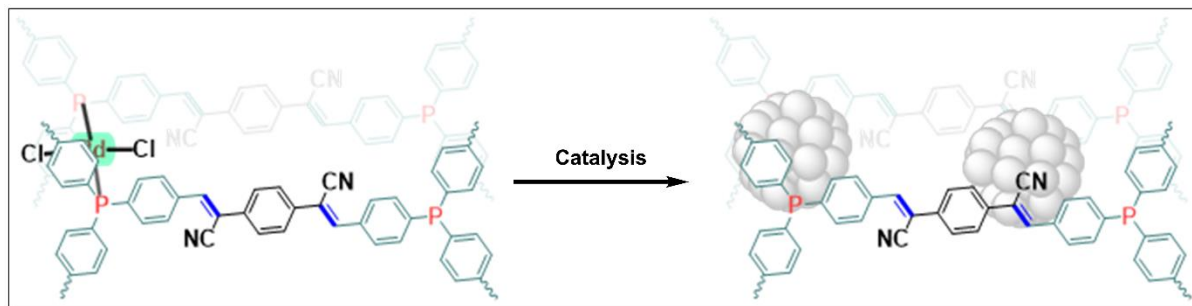

**Figure S42:** Plausible active sites to stabilize Pd(0) formed during the catalysis

Controlled experiments to determine *trans*-selective product

We performed some controlled reactions to get insight into the selectivity and the choice of substituents at different reactants. Under optimized conditions, when we reacted 4-methyliodobenzene (**I21**) instead of 2-methyl iodobenzene (**I1**), we found **35** : **Z-35** = 55 : 45 selectivity (**A**). On the other hand, when 2-methylphenylboronic acid (**B9**) was reacted instead of 4-methylphenylboronic acid (**B1**), the reaction still gave **36** : **Z-36** = 55 : 45 selectivity (**B**). This result suggested that 2-methyl iodobenzene plays a vital role in stereoselectivity and that *trans*-metalation with aryl boronic acid took place after the *Z* to *E* isomerization of the palladium(II) intermediate.

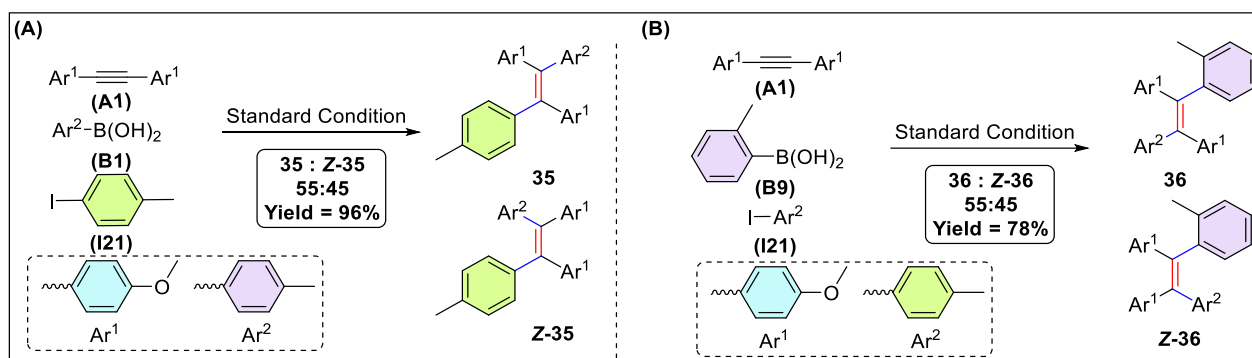

**Figure S43:** Controlled experiments to determine *trans*- selective product

### Proposed mechanism

Eventually, we assume the possible pathway of the reaction mechanism based on the previous report and our experimental observations. Pd(II) pre-catalyst is reduced to Pd(0) under the reaction conditions with the aid of base and ligand. The oxidative addition with aryl iodide gives complex **II**, which undergoes carbopalladation diarylacetylene to form complex **III**. In this complex, steric hindrance between Ar<sup>3</sup> and **PKPOP** ligand pushes isomerization to form complex **IV**. Bulkier *ortho*-substituent facilitates the isomerization and thereby yield higher *trans*-selective product. At this stage, arylboronic acid, in collaboration with Na<sub>2</sub>CO<sub>3</sub>, undergoes *trans*-metalation to form complex **V**. Finally, reductive elimination expels the product and regenerates the catalyst.

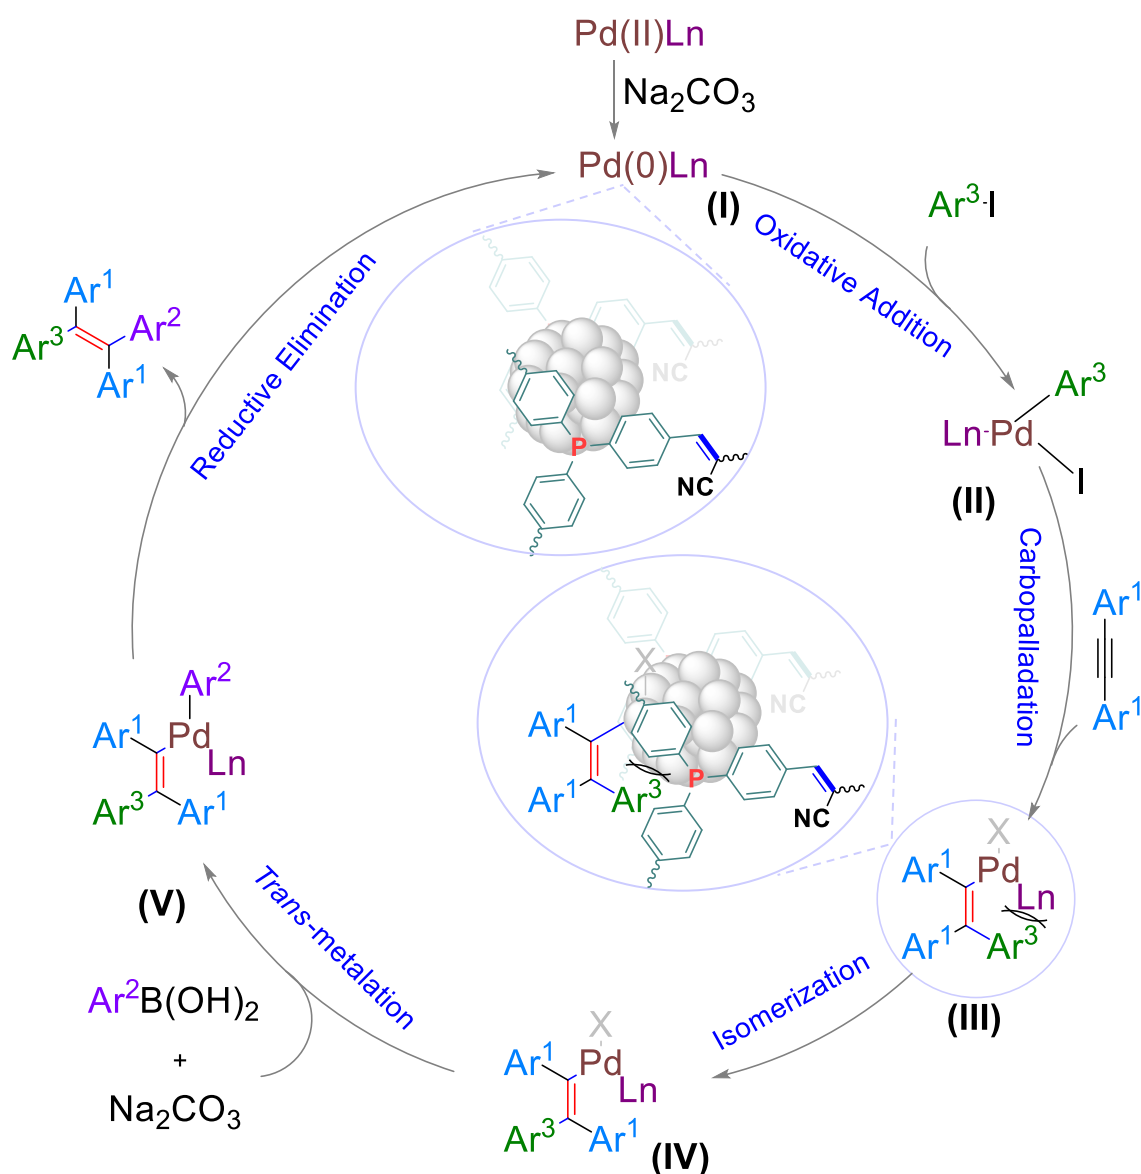

**Figure S44:** Plausible catalytic cycle

## Section SM-XII : Molecular structure and crystal data

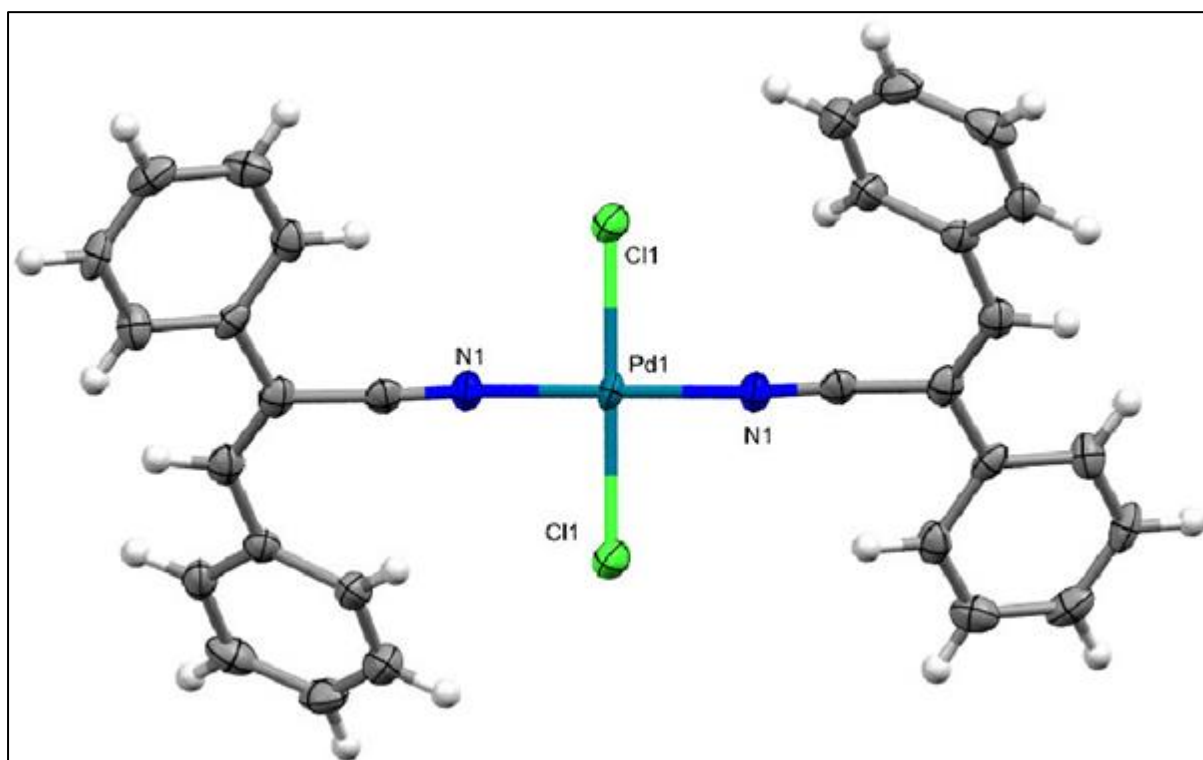

**Figure S45:** Molecular structure for compound **PdCl<sub>2</sub>(BB5)<sub>2</sub>**. Crystallization procedure: 10.0 mg solid compound was taken in a glass vial and dissolved in 0.5 mL CHCl<sub>3</sub> and kept at ambient temperature (20 °C) for crystallization. **CCDC No.-2265650**

### Crystal data and structure refinement for PdCl<sub>2</sub>(BB5)<sub>2</sub>

|                                    |                                                                   |
|------------------------------------|-------------------------------------------------------------------|
| Identification code                | PKA730_Pd_auto_1                                                  |
| Empirical formula                  | C <sub>30</sub> H <sub>22</sub> Cl <sub>2</sub> N <sub>2</sub> Pd |
| Formula weight                     | 587.79                                                            |
| Temperature/K                      | 99.98(10)                                                         |
| Crystal system                     | triclinic                                                         |
| Space group                        | P-1                                                               |
| a/Å                                | 7.6299(2)                                                         |
| b/Å                                | 8.9441(2)                                                         |
| c/Å                                | 10.0875(2)                                                        |
| α/°                                | 97.816(2)                                                         |
| β/°                                | 106.126(2)                                                        |
| γ/°                                | 102.556(2)                                                        |
| Volume/Å <sup>3</sup>              | 631.18(3)                                                         |
| Z                                  | 1                                                                 |
| ρ <sub>calc</sub> /cm <sup>3</sup> | 1.546                                                             |
| μ/mm <sup>-1</sup>                 | 0.969                                                             |
| F(000)                             | 296.0                                                             |
| Crystal size/mm <sup>3</sup>       | 0.1 × 0.1 × 0.02                                                  |
| Radiation                          | Mo Kα (λ = 0.71073)                                               |

|                                                  |                                                                  |
|--------------------------------------------------|------------------------------------------------------------------|
| 2 $\theta$ range for data collection/ $^{\circ}$ | 4.298 to 53.98                                                   |
| Index ranges                                     | $-9 \leq h \leq 9$ , $-11 \leq k \leq 11$ , $-12 \leq l \leq 12$ |
| Reflections collected                            | 10383                                                            |
| Independent reflections                          | 2627 [ $R_{\text{int}} = 0.0568$ , $R_{\text{sigma}} = 0.0559$ ] |
| Data/restraints/parameters                       | 2627/0/160                                                       |
| Goodness-of-fit on $F^2$                         | 1.072                                                            |
| Final R indexes [ $I \geq 2\sigma(I)$ ]          | $R_1 = 0.0402$ , $wR_2 = 0.0826$                                 |
| Final R indexes [all data]                       | $R_1 = 0.0479$ , $wR_2 = 0.0883$                                 |
| Largest diff. peak/hole / $e \text{ \AA}^{-3}$   | 1.09/-0.53                                                       |

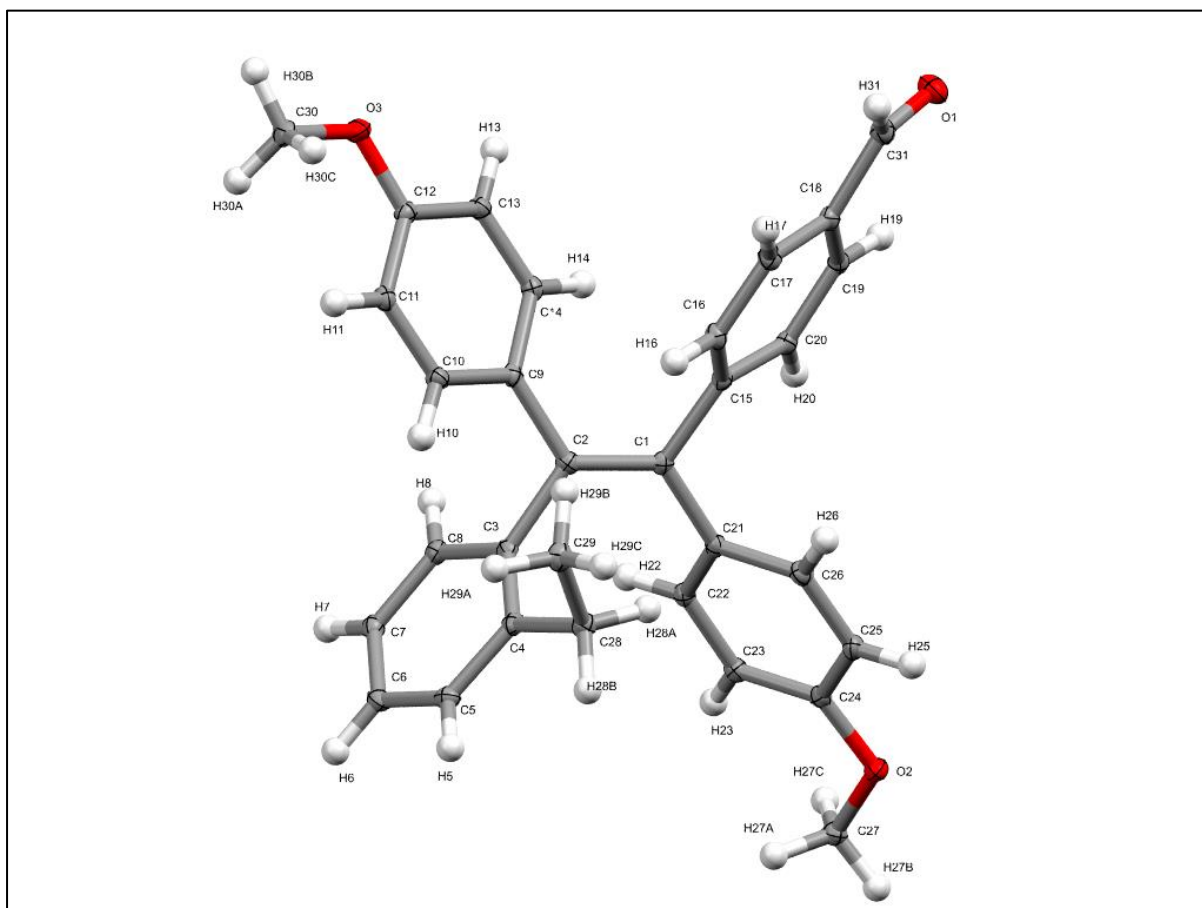

**Figure S46:** Molecular structure for compound **3**. Crystallization procedure: 10.0 mg solid compound was taken in a glass vial and dispersed in 0.5 mL ethyl acetate: hexane (0.5 : 99.5). It was dissolved on reflux and kept at ambient temperature (20  $^{\circ}\text{C}$ ) for crystallization. **CCDC No.-2221369**

### Crystal data and structure refinement for compound **3**

|                     |                                        |
|---------------------|----------------------------------------|
| Identification code | PK-CHOOME_auto_1                       |
| Empirical formula   | $\text{C}_{31}\text{H}_{28}\text{O}_3$ |

|                                             |                                                               |
|---------------------------------------------|---------------------------------------------------------------|
| Formula weight                              | 448.53                                                        |
| Temperature/K                               | 100.00(10)                                                    |
| Crystal system                              | monoclinic                                                    |
| Space group                                 | P2 <sub>1</sub> /n                                            |
| a/Å                                         | 11.2216(2)                                                    |
| b/Å                                         | 15.1257(3)                                                    |
| c/Å                                         | 14.4955(3)                                                    |
| α/°                                         | 90                                                            |
| β/°                                         | 108.837(2)                                                    |
| γ/°                                         | 90                                                            |
| Volume/Å <sup>3</sup>                       | 2328.61(8)                                                    |
| Z                                           | 4                                                             |
| ρ <sub>calc</sub> /cm <sup>3</sup>          | 1.279                                                         |
| μ/mm <sup>-1</sup>                          | 0.639                                                         |
| F(000)                                      | 952.0                                                         |
| Crystal size/mm <sup>3</sup>                | 0.1 × 0.1 × 0.07                                              |
| Radiation                                   | Cu Kα (λ = 1.54184)                                           |
| 2θ range for data collection/°              | 8.702 to 136.27                                               |
| Index ranges                                | -13 ≤ h ≤ 12, -18 ≤ k ≤ 17, -17 ≤ l ≤ 17                      |
| Reflections collected                       | 16598                                                         |
| Independent reflections                     | 4212 [R <sub>int</sub> = 0.0912, R <sub>sigma</sub> = 0.0471] |
| Data/restraints/parameters                  | 4212/0/310                                                    |
| Goodness-of-fit on F <sup>2</sup>           | 1.077                                                         |
| Final R indexes [I ≥ 2σ (I)]                | R <sub>1</sub> = 0.0567, wR <sub>2</sub> = 0.1582             |
| Final R indexes [all data]                  | R <sub>1</sub> = 0.0592, wR <sub>2</sub> = 0.1626             |
| Largest diff. peak/hole / e Å <sup>-3</sup> | 0.41/-0.37                                                    |

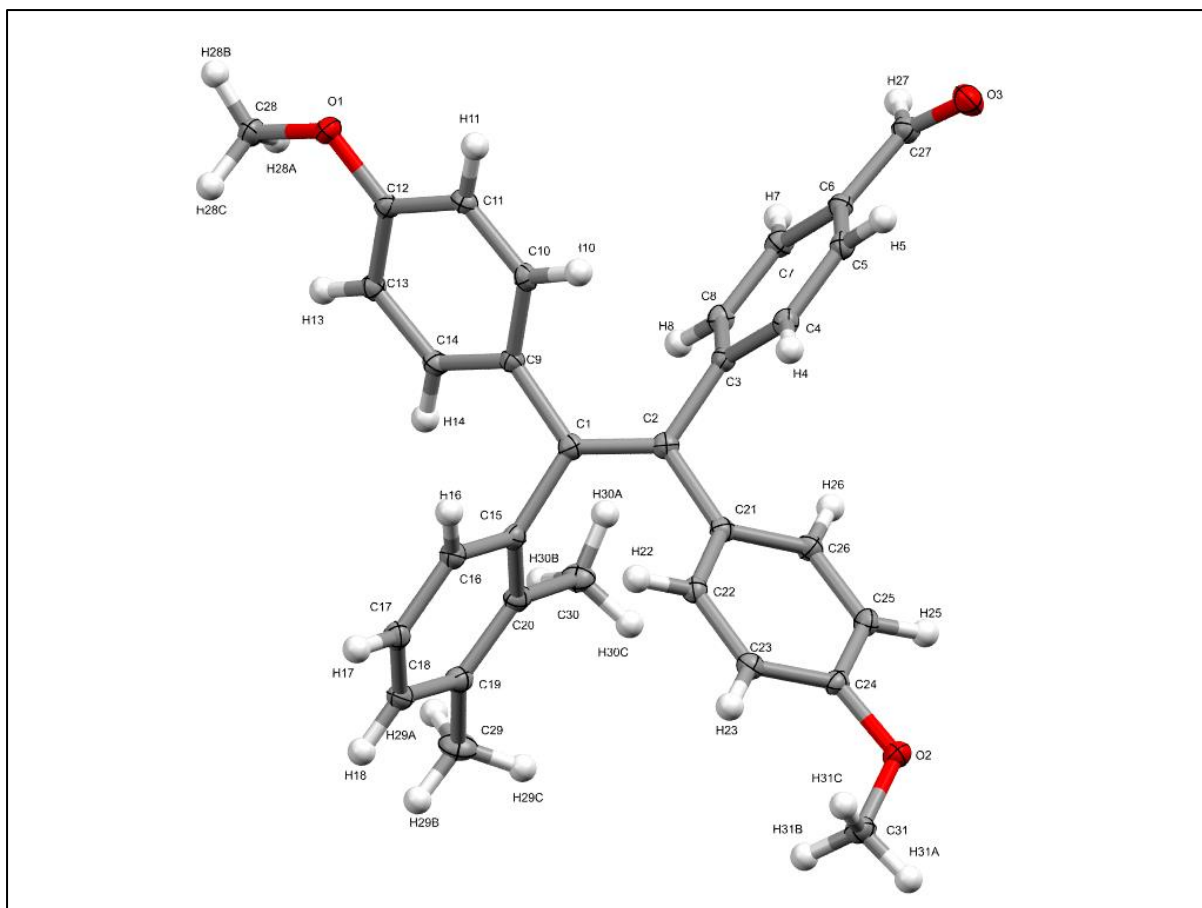

**Figure S47:** Molecular structure for compound **9**. Crystallization procedure: 10.0 mg solid compound was taken in a glass vial and dispersed in 0.5 mL ethyl acetate: hexane (0.5 : 99.5). It was dissolved on reflux and kept at ambient temperature (20 °C) for crystallization. **CCDC No.-2232806**

### Crystal data and structure refinement for compound **9**

|                             |                                                |
|-----------------------------|------------------------------------------------|
| Identification code         | PKA_538A_auto_1                                |
| Empirical formula           | C <sub>31</sub> H <sub>28</sub> O <sub>3</sub> |
| Formula weight              | 448.53                                         |
| Temperature/K               | 113(18)                                        |
| Crystal system              | monoclinic                                     |
| Space group                 | P21/n                                          |
| a/Å                         | 10.9595(4)                                     |
| b/Å                         | 15.8984(5)                                     |
| c/Å                         | 14.7337(5)                                     |
| $\alpha$ /°                 | 90                                             |
| $\beta$ /°                  | 111.118(4)                                     |
| $\gamma$ /°                 | 90                                             |
| Volume/Å <sup>3</sup>       | 2394.77(15)                                    |
| Z                           | 4                                              |
| $\rho$ calc/cm <sup>3</sup> | 1.244                                          |
| $\mu$ /mm <sup>-1</sup>     | 0.079                                          |

|                                                  |                                                                        |
|--------------------------------------------------|------------------------------------------------------------------------|
| F(000)                                           | 952.0                                                                  |
| Crystal size/mm <sup>3</sup>                     | 0.5 × 0.1 × 0.1                                                        |
| Radiation                                        | Mo K $\alpha$ ( $\lambda$ = 0.71073)                                   |
| 2 $\Theta$ range for data collection/ $^{\circ}$ | 3.918 to 54.134                                                        |
| Index ranges                                     | -13 $\leq$ h $\leq$ 13, -20 $\leq$ k $\leq$ 19, -18 $\leq$ l $\leq$ 18 |
| Reflections collected                            | 29857                                                                  |
| Independent reflections                          | 5010 [Rint = 0.0387, Rsigma = 0.0297]                                  |
| Data/restraints/parameters                       | 5010/0/311                                                             |
| Goodness-of-fit on F <sup>2</sup>                | 1.047                                                                  |
| Final R indexes [ $I \geq 2\sigma(I)$ ]          | R1 = 0.0428, wR2 = 0.1101                                              |
| Final R indexes [all data]                       | R1 = 0.0540, wR2 = 0.1177                                              |
| Largest diff. peak/hole / e $\text{\AA}^{-3}$    | 0.29/-0.21                                                             |

### **Section SM-XIII: Synthesis, characterizations and catalytic activity of other polymeric ligands for dicarbofunctionalization reaction**

#### **Synthesis of KAPs(Ph-PPh<sub>3</sub>), Pd@KAPs(Ph-PPh<sub>3</sub>) and their preliminary characterizations**

In a 16 mL culture tube equipped with a magnetic bar, anhydrous ferric chloride (FeCl<sub>3</sub>) (975 mg, 6.0 mmol), triphenylphosphine (525 mg, 2.0 mmol), dimethoxymethane (456 mg, 6.0 mmol) and benzene (156 mg, 2.0 mmol) were taken under inert atmosphere. Further, 2.0 mL dichloroethane was poured, and it was capped tightly. Initially, the solution was stirred at rt for 5 min and then at 45 °C for 5 h. Finally, it was stirred at 80 °C for 67 h for a complete reaction. The resulting precipitate was filtered and washed with methanol multiple times before soxhleting it for another 24 h in methanol. At last, it was dried at 60 °C under vacuum for 24 h to get dark maroon colored powder (KAPs(Ph-PPh<sub>3</sub>)) in quantitative yield.

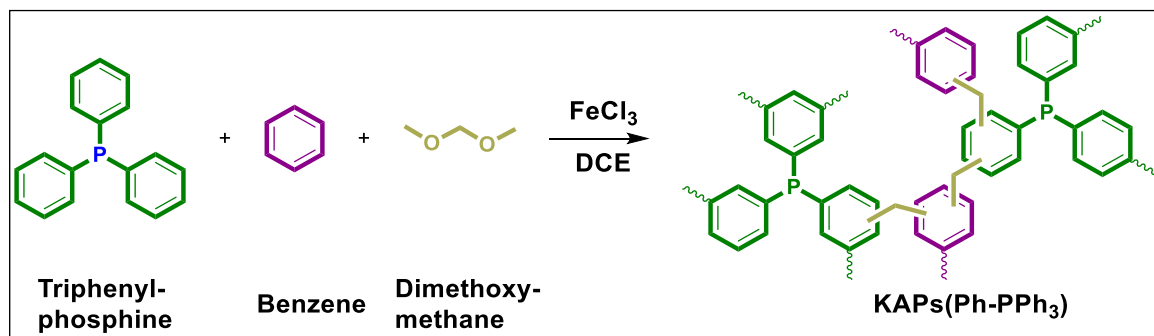

**Figure S48:** Schematic protocol for the synthesis of KAPs(Ph-PPh<sub>3</sub>)

Methanol (2.5 mL) was taken in a clean reaction tube with a magnetic stir bar. 47 mg KAPs(Ph-PPh<sub>3</sub>) was suspended into it and stirred for 2 h at rt. A pre-formed solution of 3.0 mg PdCl<sub>2</sub> in 2.5 mL methanol was mixed with the suspension and allowed to stir for 24 h at rt. Further, it was centrifuged and washed with fresh methanol five times to ensure the removal of extra unsupported PdCl<sub>2</sub>. It was dried under vacuum at 60 °C for 12 h to obtain Pd@KAPs(Ph-PPh<sub>3</sub>).



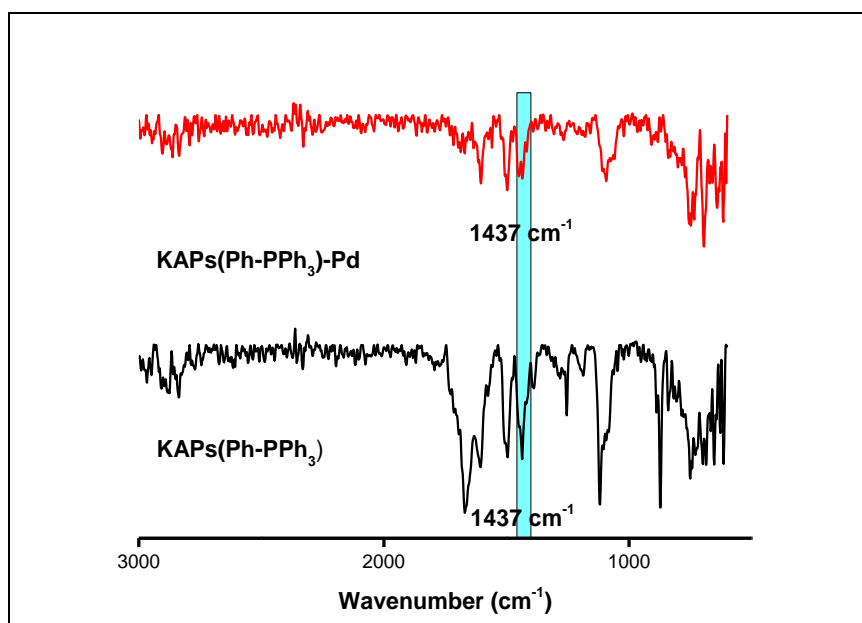

**Figure S49:** The bands in the FTIR spectrum around 1600–1450, 1250–950, and 900–650  $\text{cm}^{-1}$  can be assigned to benzene skeleton stretching, C–H out-of-plane bending, and in-plane bending vibrations of the benzene ring, respectively. The peaks at 1437  $\text{cm}^{-1}$  correspond to the vibrations of the P–CH<sub>2</sub> bond and data matching with the literature<sup>13</sup>

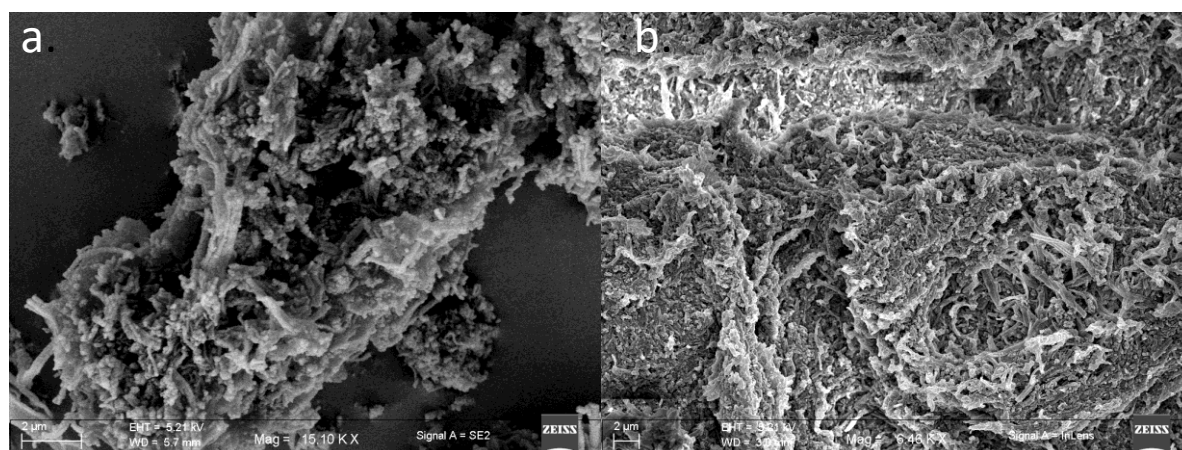

**Figure S50:** (a) FESEM image of KAPs(Ph-PPh<sub>3</sub>) and (b) FESEM image of Pd@KAPs(Ph-PPh<sub>3</sub>). The scale is 2  $\mu\text{m}$  unless otherwise stated. Also, the morphology is similar to the report in literature<sup>13</sup>

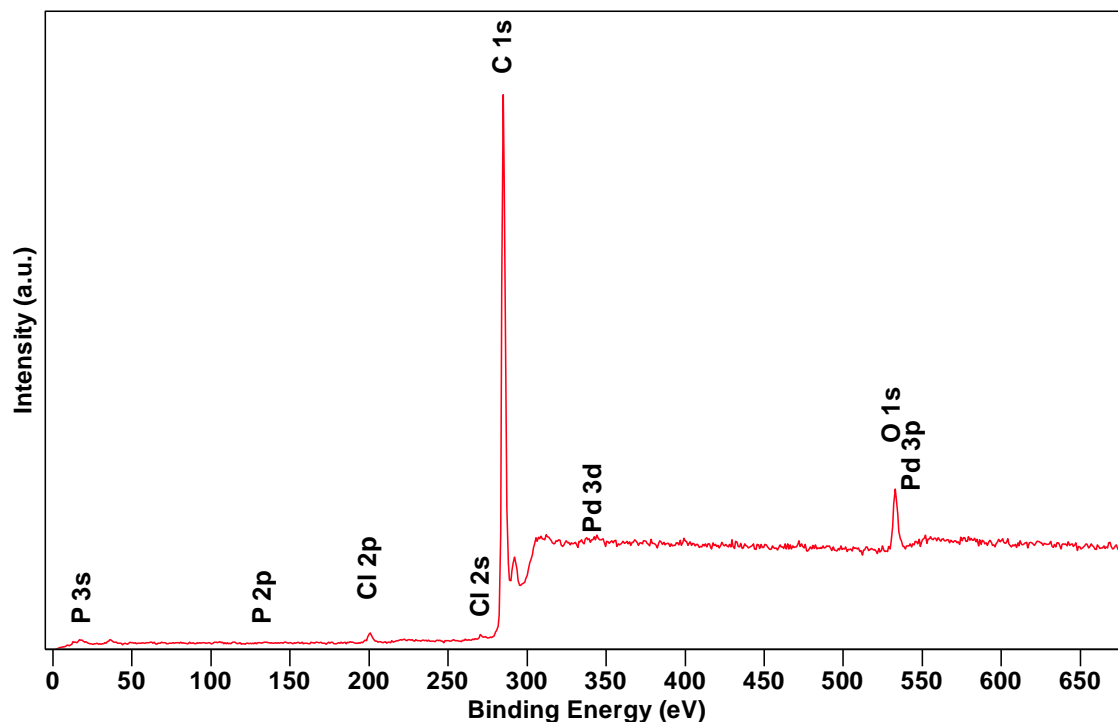

**Figure S51:** XPS spectrum of Pd@KAPs(Ph-PPh<sub>3</sub>) showing elemental constituency after metalation and data matching with literature<sup>13</sup>

**Synthesis of Phos-polymer, Pd@Phos-polymer, and their preliminary characterizations**

In a 16 mL reaction tube, **BB1** (104 mg, 0.30 mmol), 1,4-diaminobenzene (48.6 mg, 0.45 mmol), 6M acetic acid (0.6 mL), 1,4-dioxane (1.5 mL), and mesitylene (0.5 mL) were added and was degassed three times through freeze–pump–thaw technique, and capped under inert condition. The mixture was allowed to attain rt before keeping it at 120 °C for 72h. The yellow-colored precipitate was filtered and washed with DMF and THF multiple times and dried under vacuum at 60 °C to yield the **Phos-polymer** in a quantitative amount.

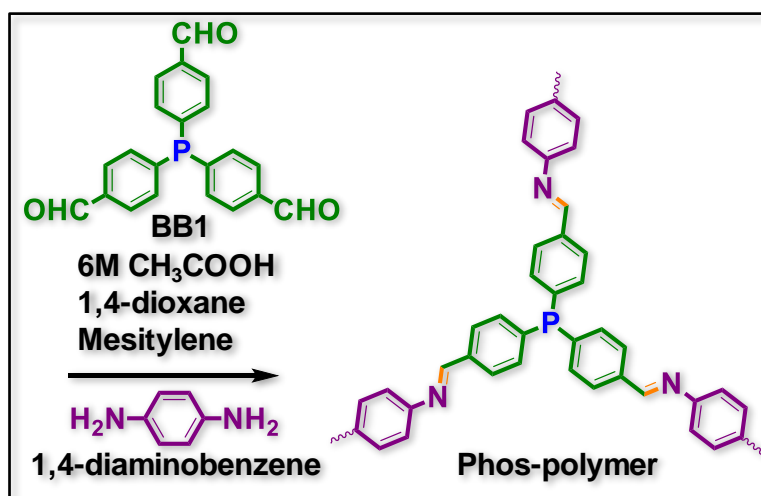

**Figure S52:** Schematic protocol for the synthesis of Phos-polymer

Methanol (2.5 mL) was taken in a clean reaction tube with a magnetic stir bar. 47 mg **Phos-polymer** was suspended into it and stirred for 2 h at rt. A pre-formed solution of 3.0 mg PdCl<sub>2</sub> in 2.5 mL methanol was mixed with the suspension and allowed to stir for 24 h at rt. Further, it was centrifuged and washed with fresh methanol five times to ensure the removal of extra unsupported PdCl<sub>2</sub>. It was dried under vacuum at 60 °C for 12 h to obtain **Pd@Phos-polymer**.

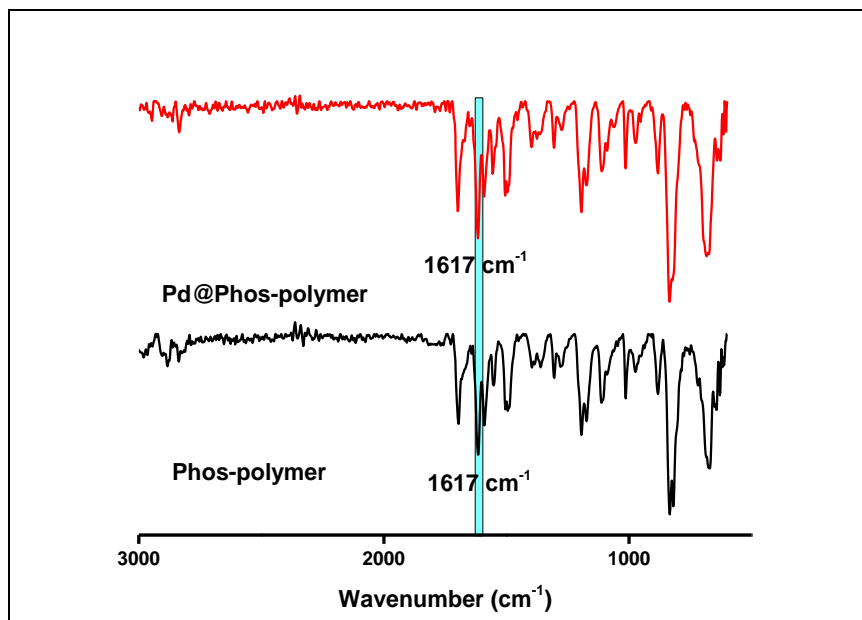

**Figure S53:** In the FT-IR spectrum, C=N stretching at  $\approx 1617\text{ cm}^{-1}$  shows the formation of imine bonds, and remain intact even after metalation. This data is well matching with literature<sup>14</sup>

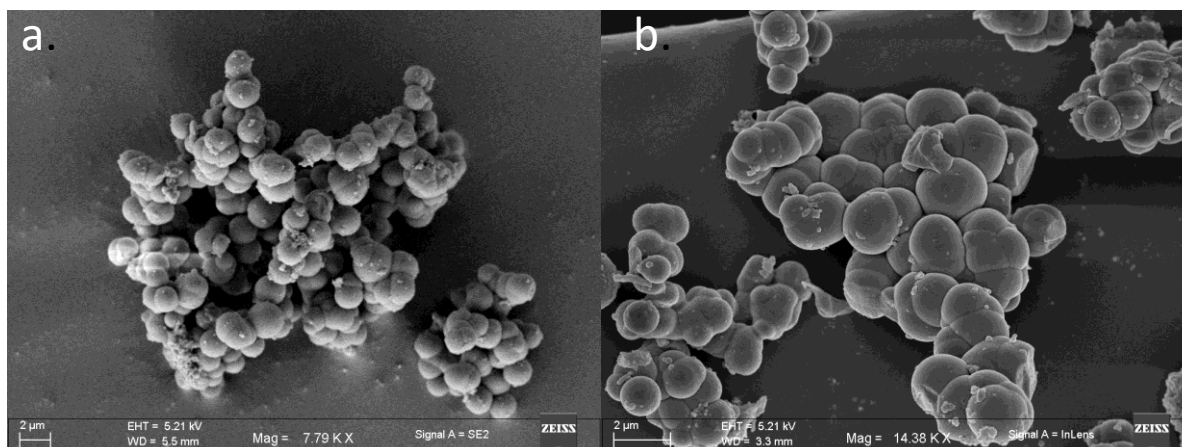

**Figure S54:** (a) FESEM image of **Phos-polymer** (b) FESEM image of **Pd@Phos-polymer**. The scale is 2 μm unless otherwise stated. Also, the morphology is similar to the report in literature<sup>14</sup>

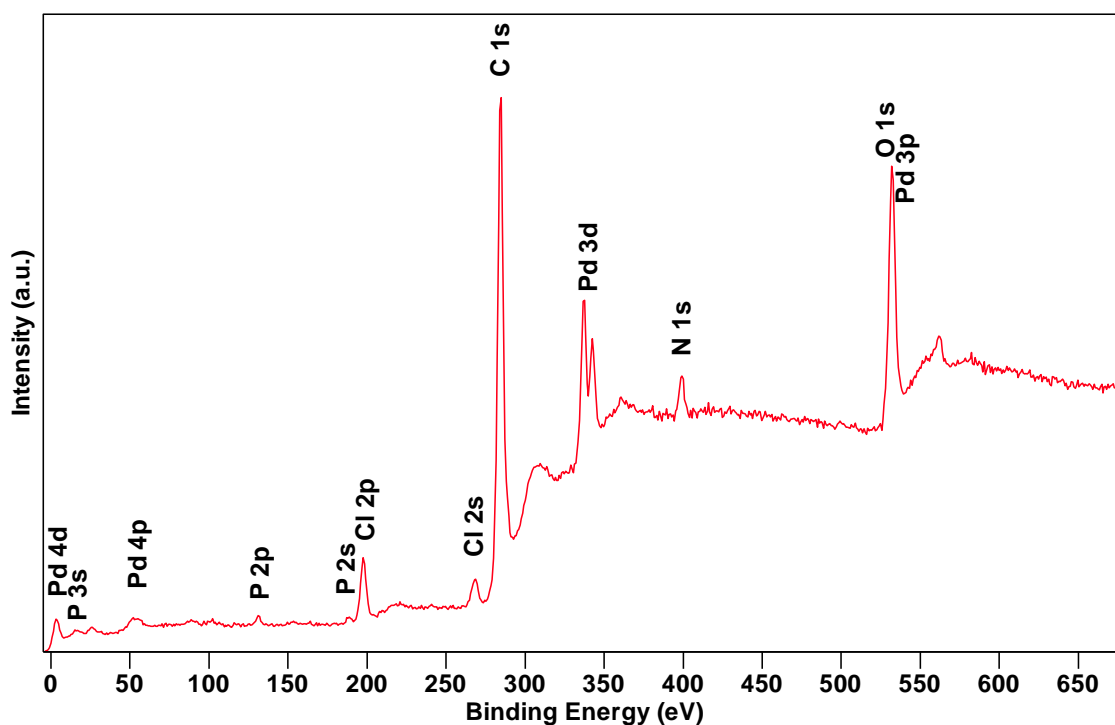

**Figure S55:** XPS spectrum of **Pd@Phos-polymer** showing elemental constituency after metalation and data is matching with literature<sup>14</sup>

### Catalytic activity of **Pd@KAPs(Ph-PPh<sub>3</sub>)** and **Pd@Phos-polymer**

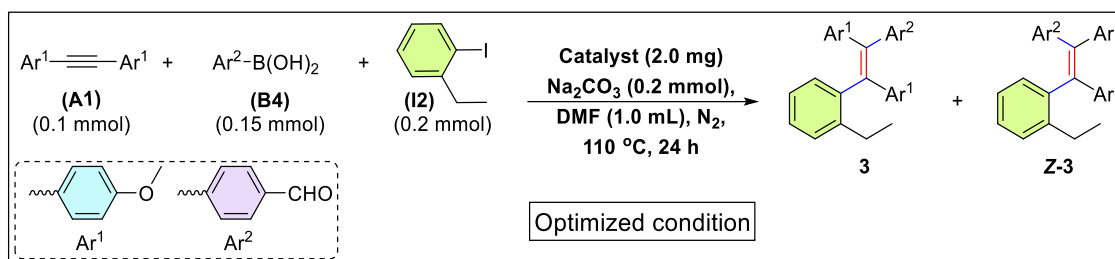

**Figure S56 :** Schematic protocol for checking catalytic activity of **Pd@KAPs(Ph-PPh<sub>3</sub>)** and **Pd@Phos-polymer**

In two 16 mL culture tubes equipped with magnetic stirrer bars, **Pd@KAPs(Ph-PPh<sub>3</sub>)** (2.0 mg) and **Pd@Phos-polymer** (2.0 mg) were taken separately. 1,2-bis(4-methoxyphenyl)ethyne **A1** (0.1 mmol), 4-formylphenylboronic acid **B4** (0.15 mmol), 2-ethyliodobenzene **I2** (0.2 mmol), Na<sub>2</sub>CO<sub>3</sub>(0.2 mmol) and 1,3,5-trimethoxybenzene (0.1 mmol) were then subsequently introduced under inert atmosphere. Dried DMF (1.0 mL) was then added, and the tube was capped tightly and kept in a pre-heated (110 °C) oil bath at 250 rpm stirring speed. After 24 h, the oil bath was removed, and the mixture was allowed to attain rt. The reaction mixture was transferred into a centrifuge tube, and the catalyst was centrifuged. The mother liquor was added to brine (5 mL) and then extracted using ethyl acetate (3 x 2 mL). The organic layer was washed with distilled water (5mL) and dried over anhydrous Na<sub>2</sub>SO<sub>4</sub>. Further, the organic layer was evaporated under reduced pressure, and NMR analysis of the crude sample was done in

$\text{CDCl}_3$  solvent. The quantification of the product has been given w.r.t internal alkyne. The crude  $^1\text{H}$  NMR spectrum has been given below.

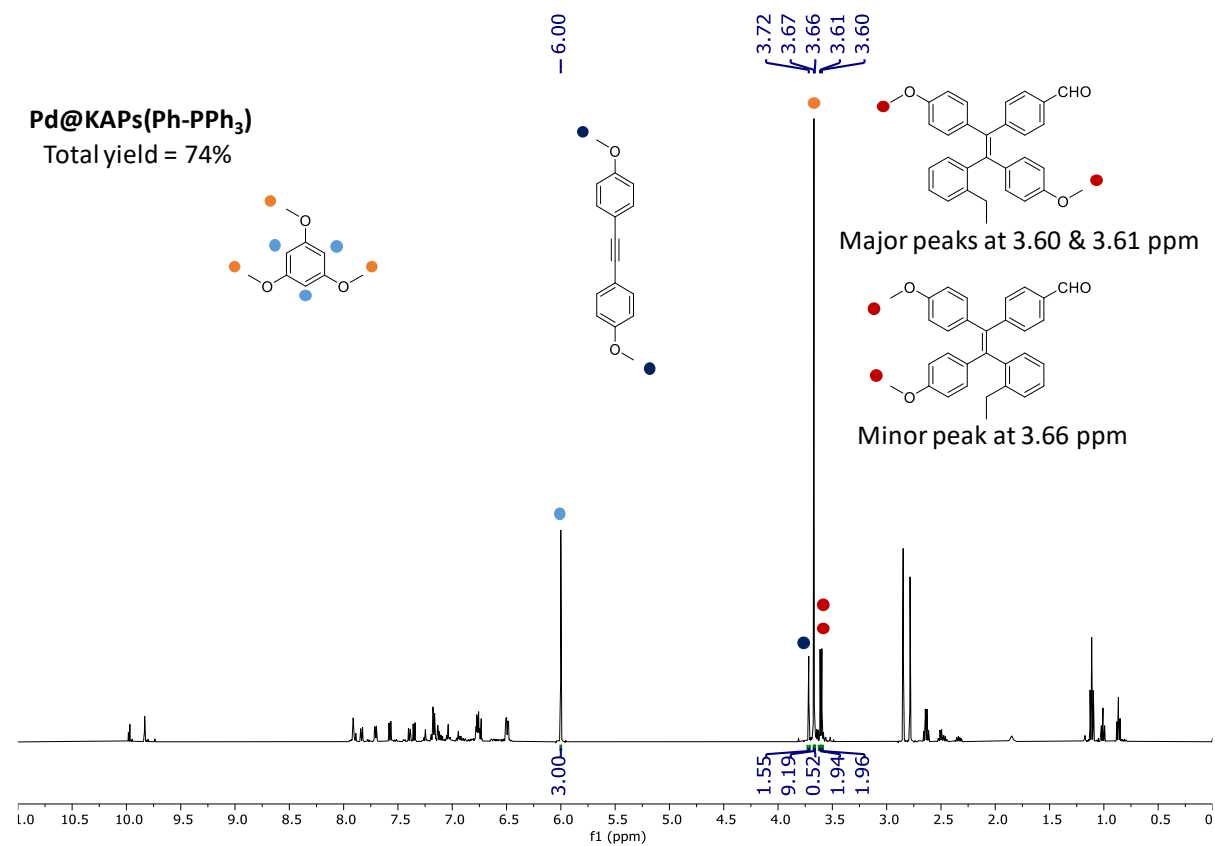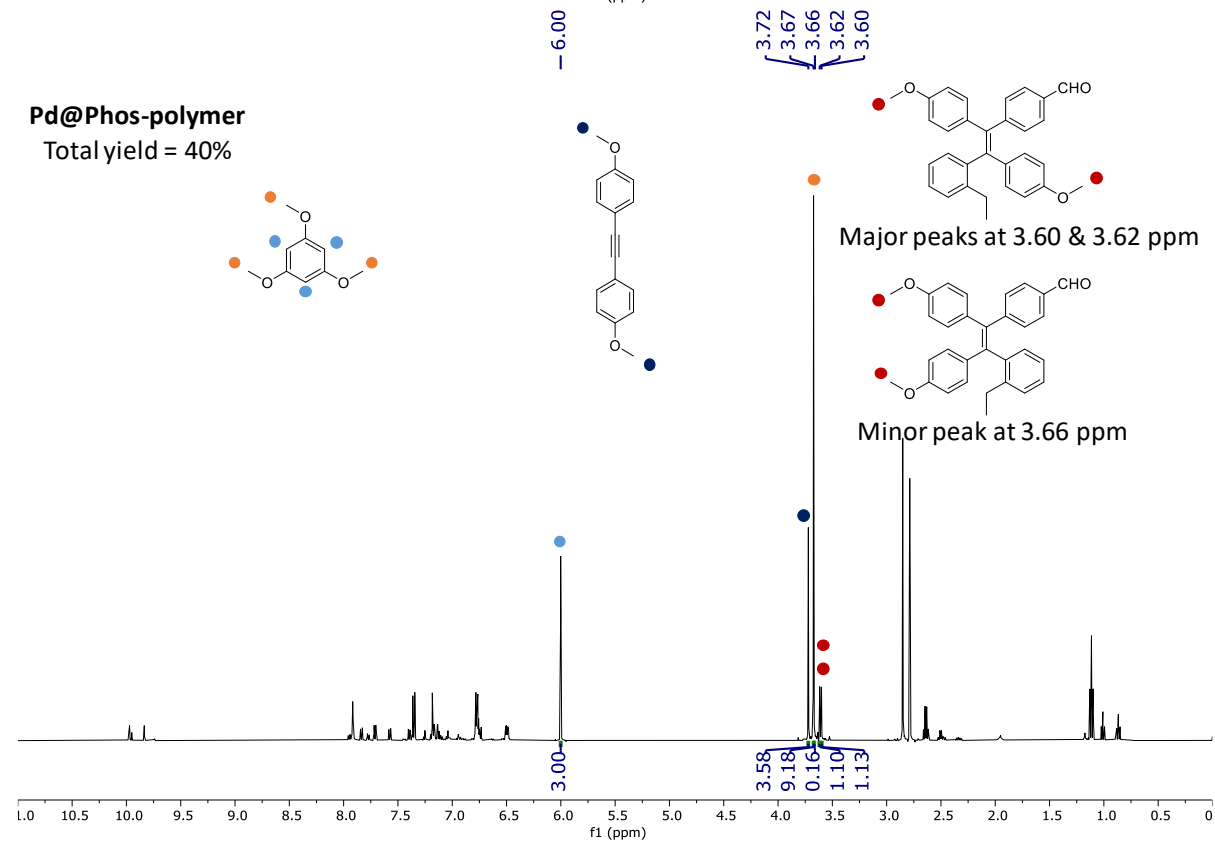

### **Section SM-XIV: References**

1. G. Deng and Z. Wang, *Macromol. Rapid Commun.*, 2018, **39**, 1700618.
2. N. F. Konig, D. Mutruc and S. Hecht, *J Am Chem Soc*, 2021, **143**, 9162-9168.
3. N. W. J. Scott, M. J. Ford, C. Schotes, R. R. Parker, A. C. Whitwood and I. J. S. Fairlamb, *Chem. Sci.*, 2019, **10**, 7898-7906.
4. M. Kraus and D. Tomanova, *J. Polym. Sci.*, 1974, **12**, 1781-1785.
5. J. J. M. De Pater, D. S. Tromp, D. M. Tooke, A. L. Spek, B.-J. Deelman, G. Van Koten and C. J. Elsevier, *organometallics*, 2005, **24**, 6411-6419.
6. C. Mo, M. Yang, F. Sun, J. Jian, L. Zhong, Z. Fang, J. Feng and D. Yu, *Adv Sci (Weinh)*, 2020, **7**, 1902988.
7. R. Tao, X. Ma, X. Wei, Y. Jin, L. Qiu and W. Zhang, *J. Mater. Chem. A*, 2020, **8**, 17360-17391.
8. H. Salemi, M. Debruyne, V. Van Speybroeck, P. Van Der Voort, M. D'Hooghe and C. V. Stevens, *J. Mater. Chem. A*, 2022, **10**, 20707-20729.
9. P. Rai, K. Maji and B. Maji, *Organic letters*, 2019, **21**, 3755-3759.
10. K. Park, G. Bae, J. Moon, J. Choe, K. H. Song and S. Lee, *J. Org. Chem.*, 2010, **75**, 6244-6251.
11. K. Park, G. Bae, A. Park, Y. Kim, J. Choe, K. H. Song and S. Lee, *Tetrahedron Letters*, 2011, **52**, 576-580.
12. W. Lv, S. Liu, Y. Chen, S. Wen, Y. Lan and G. Cheng, *ACS Catal.*, 2020, **10**, 10516-10522.
13. B. Li, Z. Guan, W. Wang, X. Yang, J. Hu, B. Tan and T. Li, *Adv. Mater.*, 2012, **24**, 3390-3395.
14. R. Tao, X. Shen, Y. Hu, K. Kang, Y. Zheng, S. Luo, S. Yang, W. Li, S. Lu, Y. Jin, L. Qiu and W. Zhang, *Small*, 2020, **16**, 1906005.

**Section SM-XV: Copies of  $^1\text{H}$ ,  $^{13}\text{C}$ ,  $^{19}\text{F}$  and  $^{31}\text{P}$  NMR spectra**

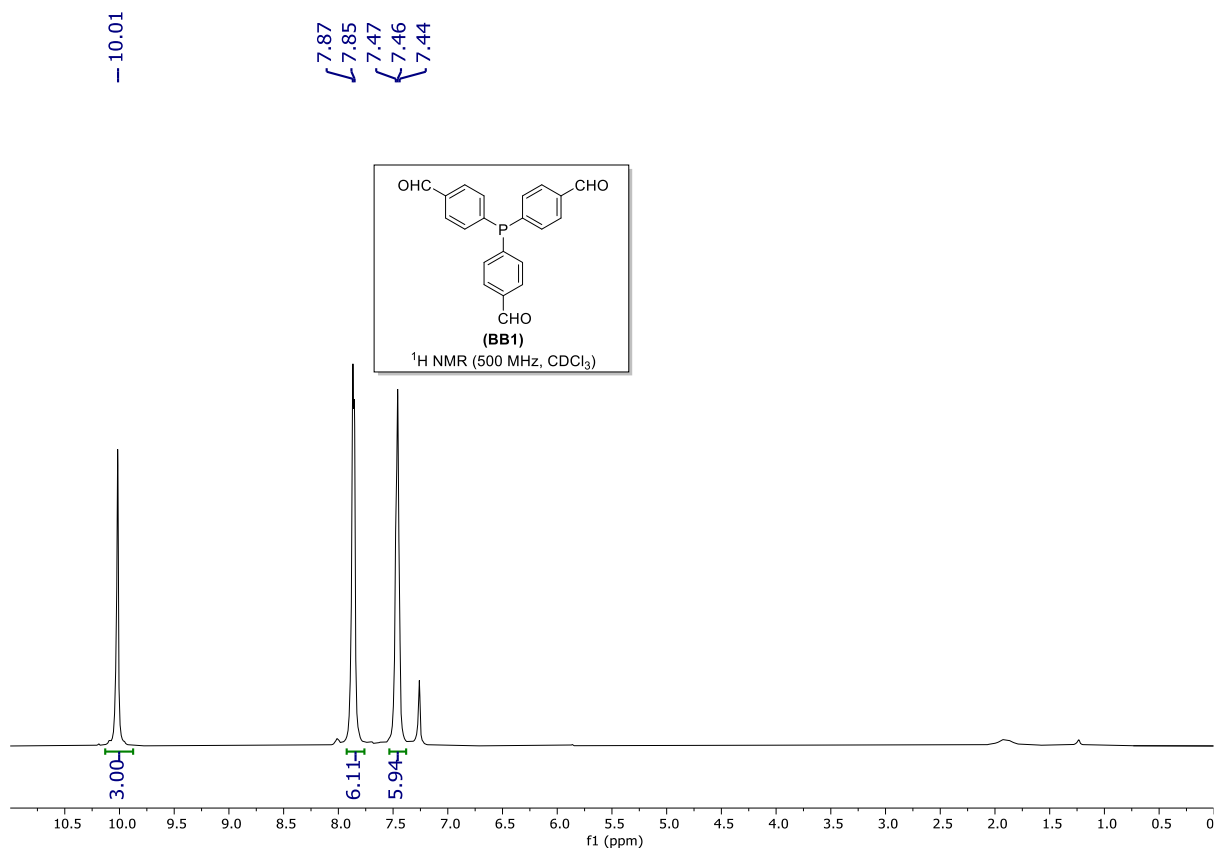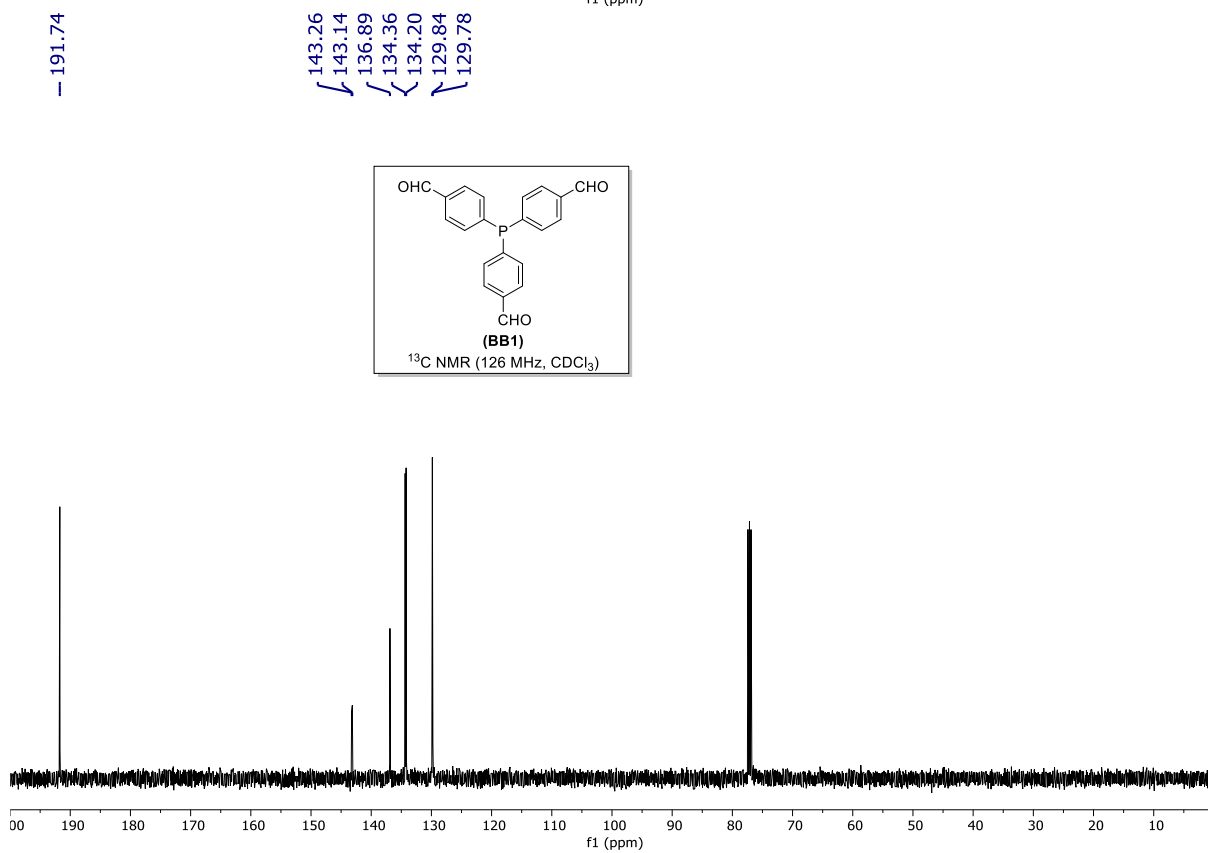

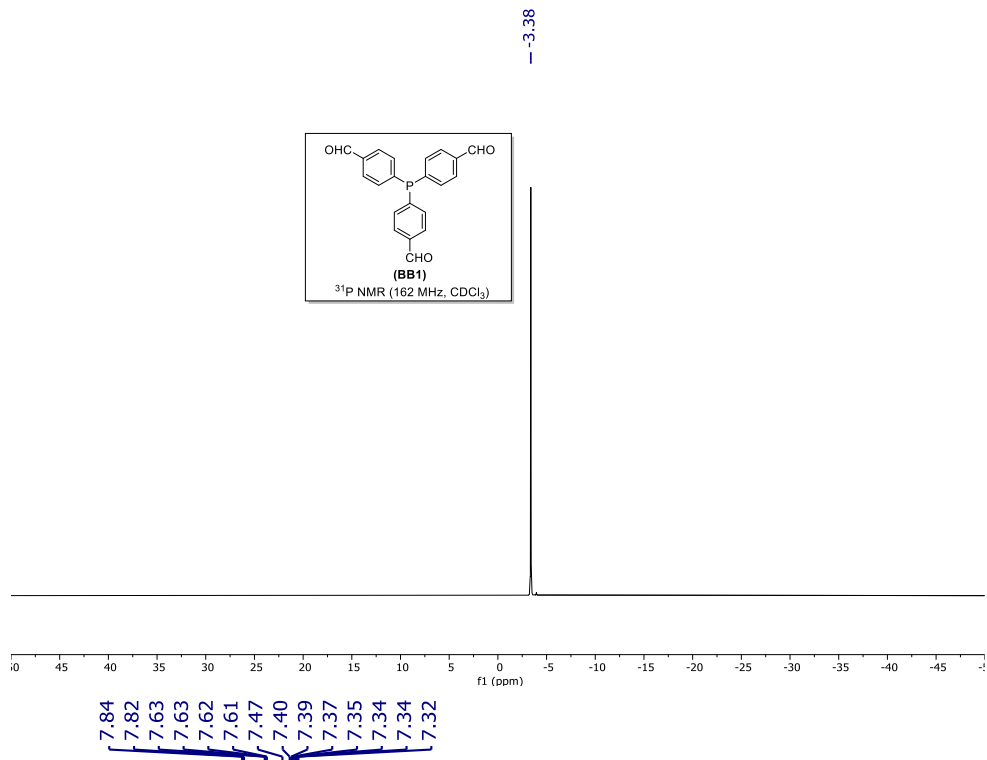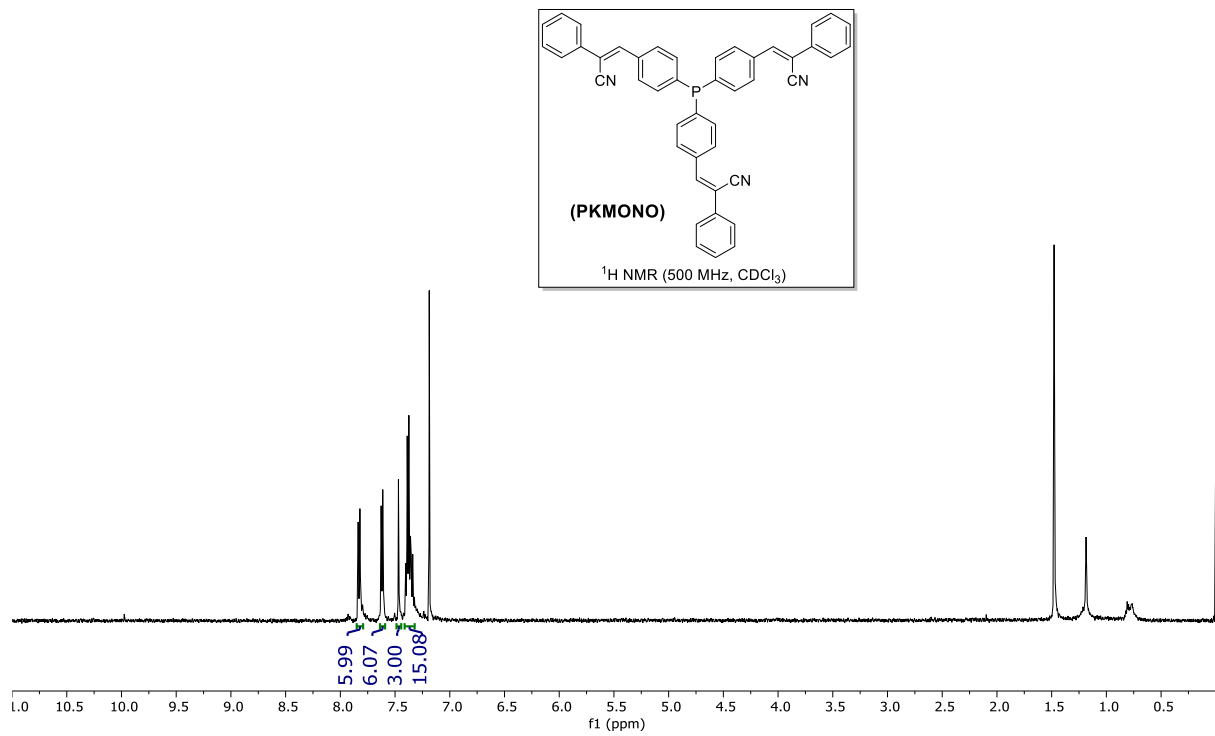



141.34  
139.40  
139.29  
134.62  
134.43  
134.40  
134.25  
129.57  
129.53  
129.47  
129.25  
126.21  
117.94  
112.82

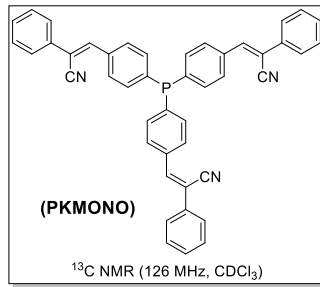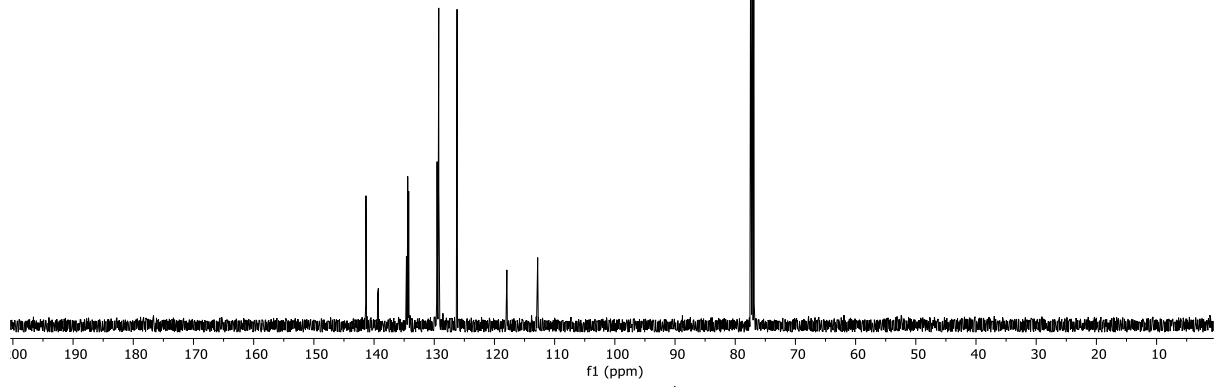

-- -4.91

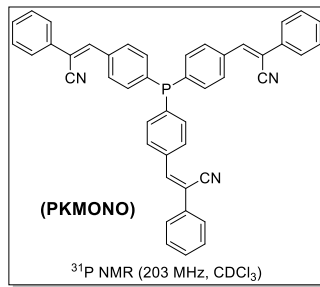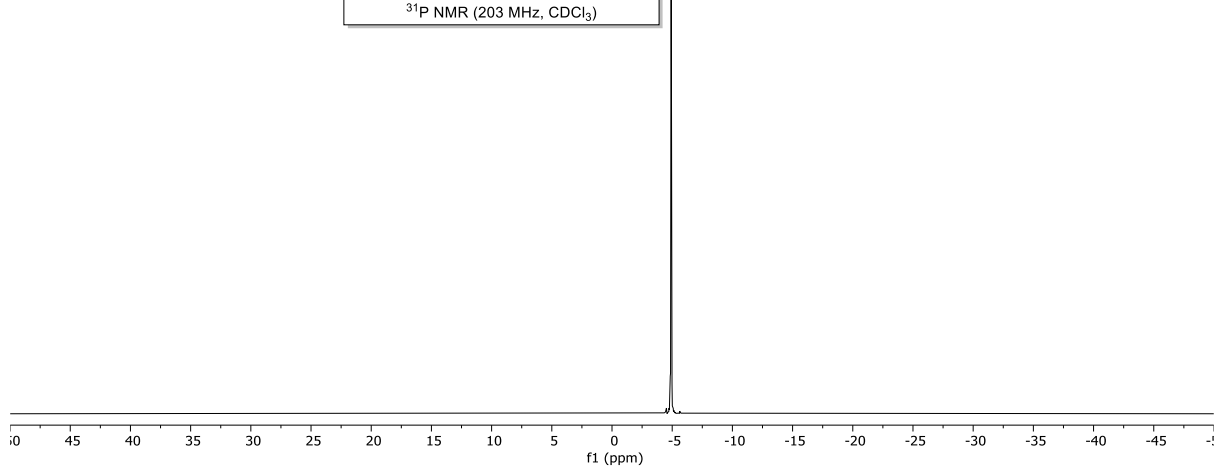

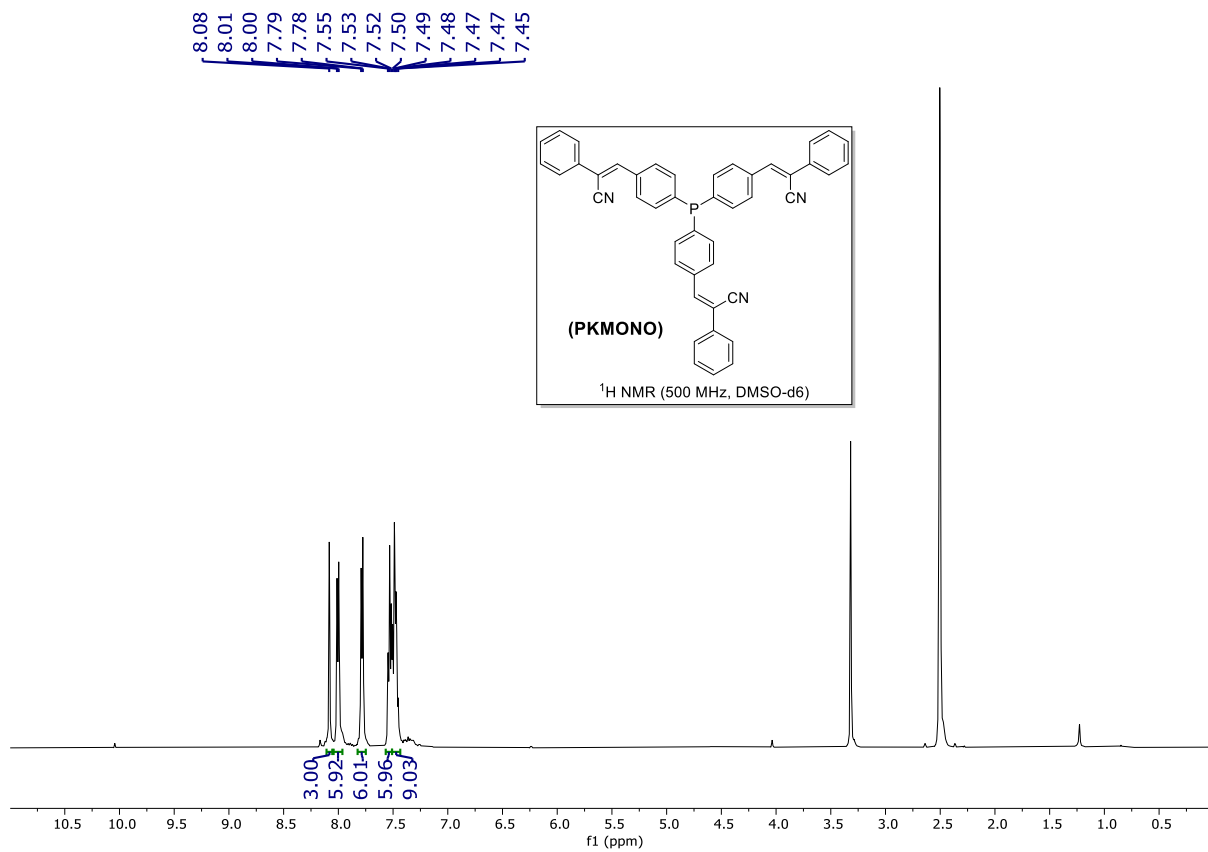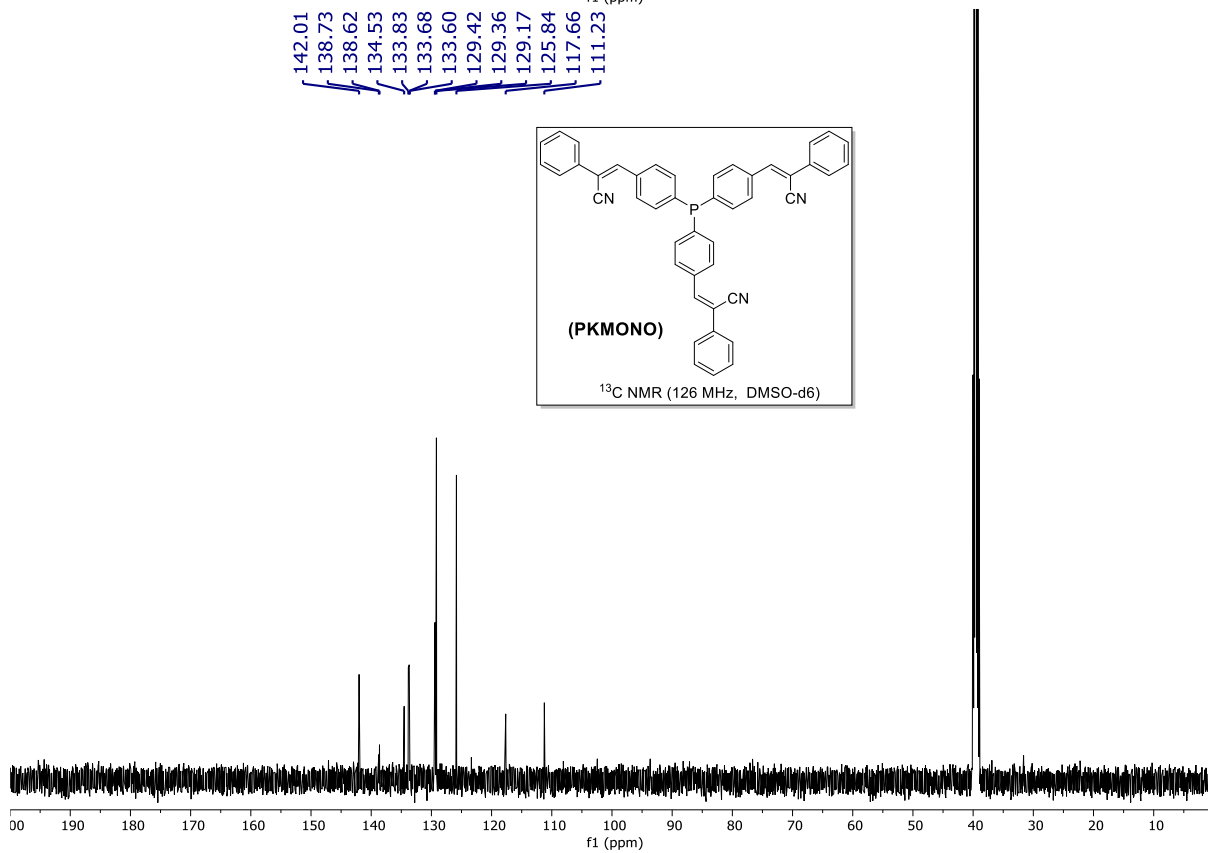

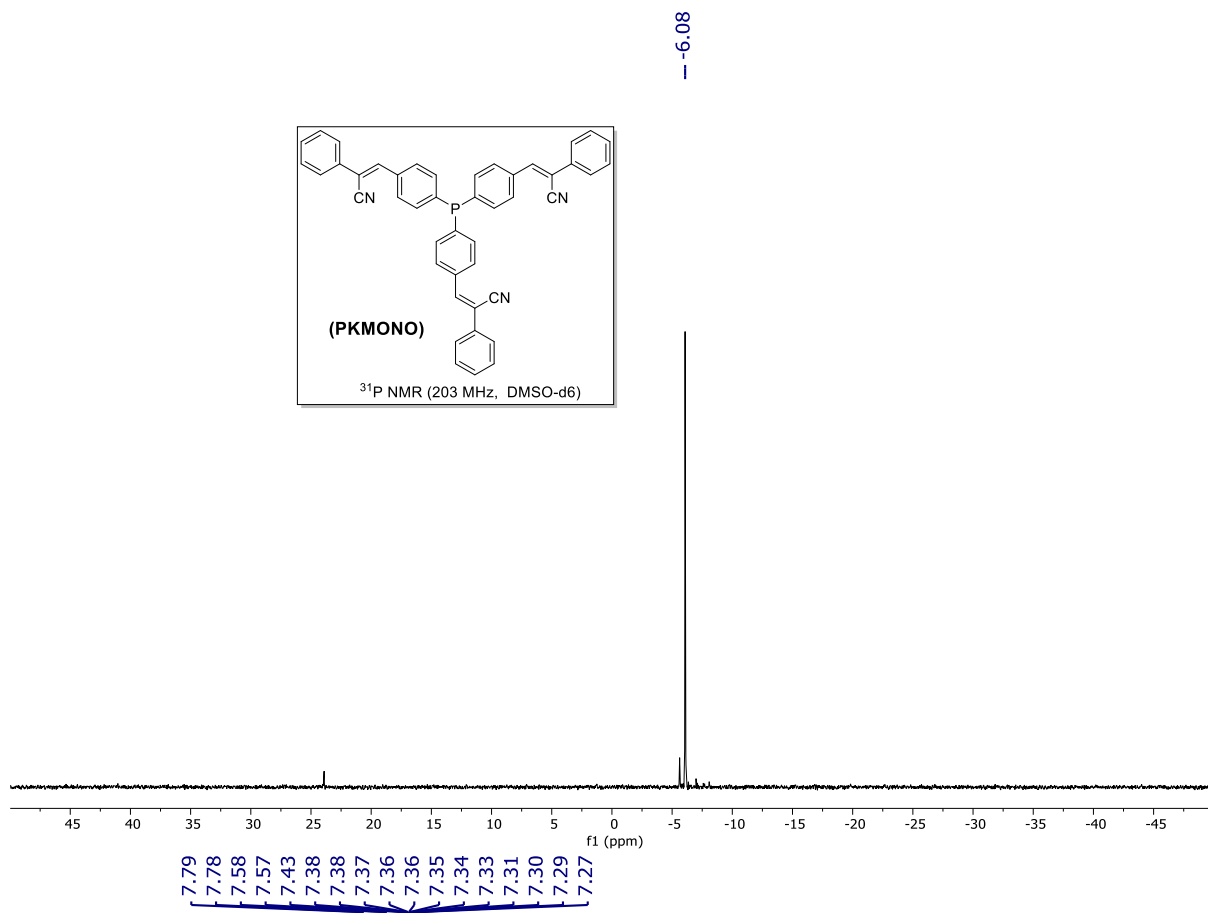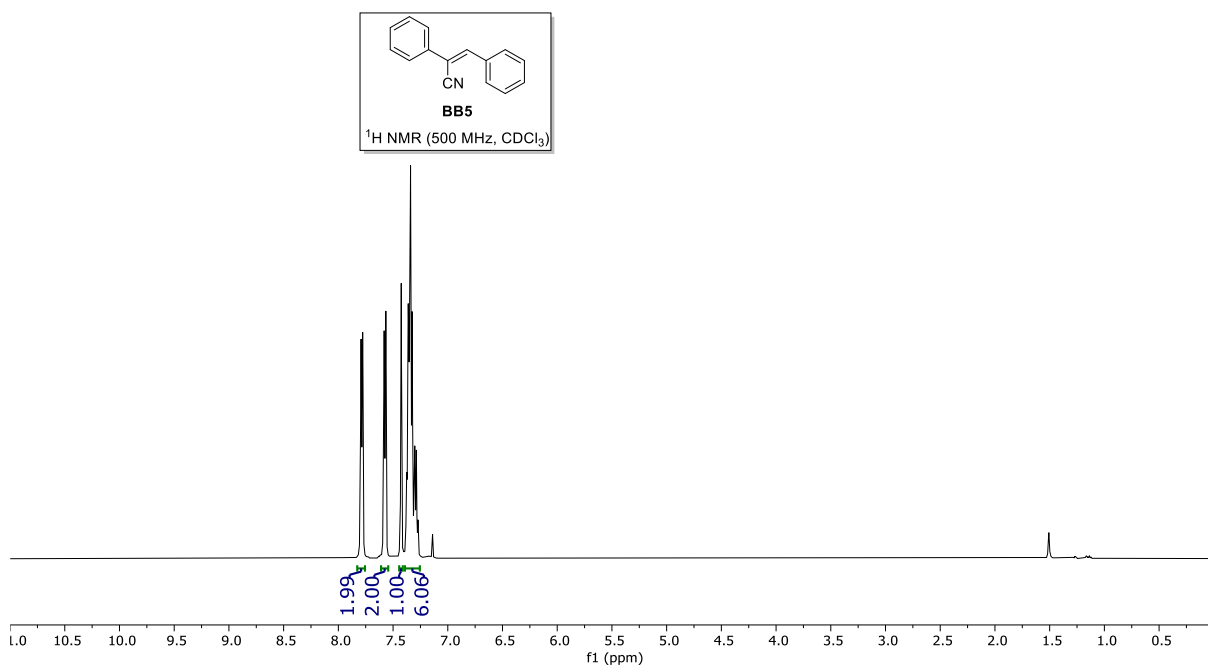

142.33  
134.56  
133.82  
130.62  
129.36  
129.29  
129.15  
129.04  
126.09  
118.08  
111.78

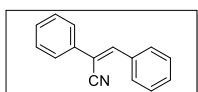

BB5

<sup>13</sup>C NMR (126 MHz, CDCl<sub>3</sub>)

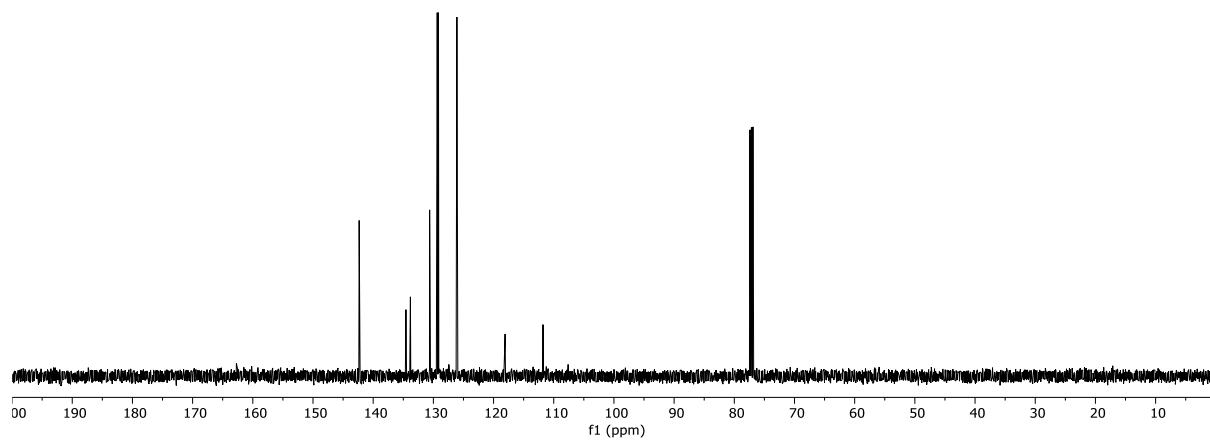

8.05  
7.96  
7.94  
7.79  
7.77  
7.57  
7.55  
7.54  
7.53  
7.53  
7.52  
7.51  
7.51  
7.49  
7.48  
7.46  
7.46  
7.45

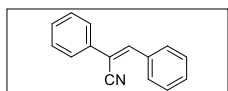

BB5

<sup>1</sup>H NMR (500 MHz, DMSO-d<sub>6</sub>)

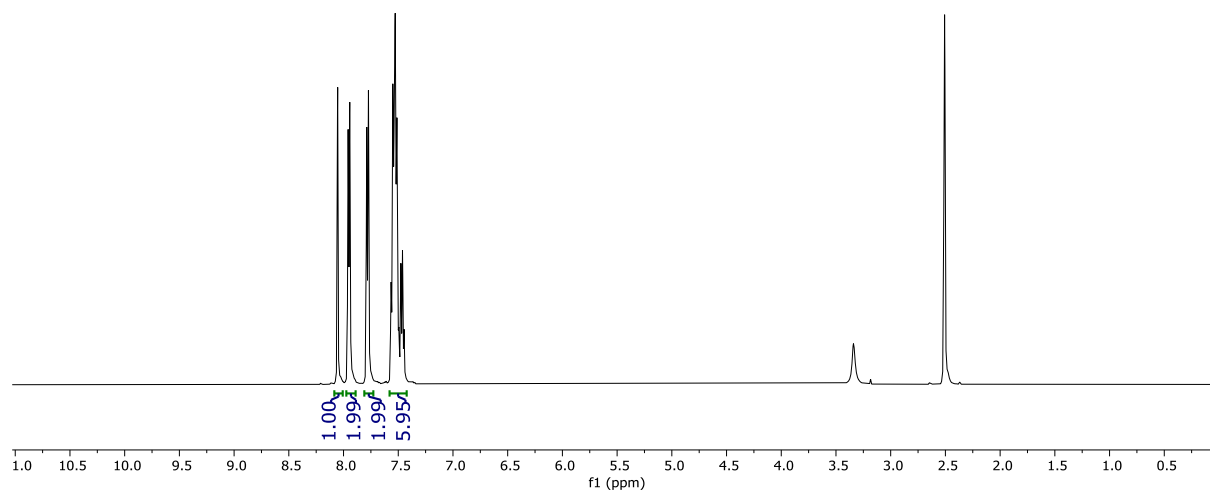

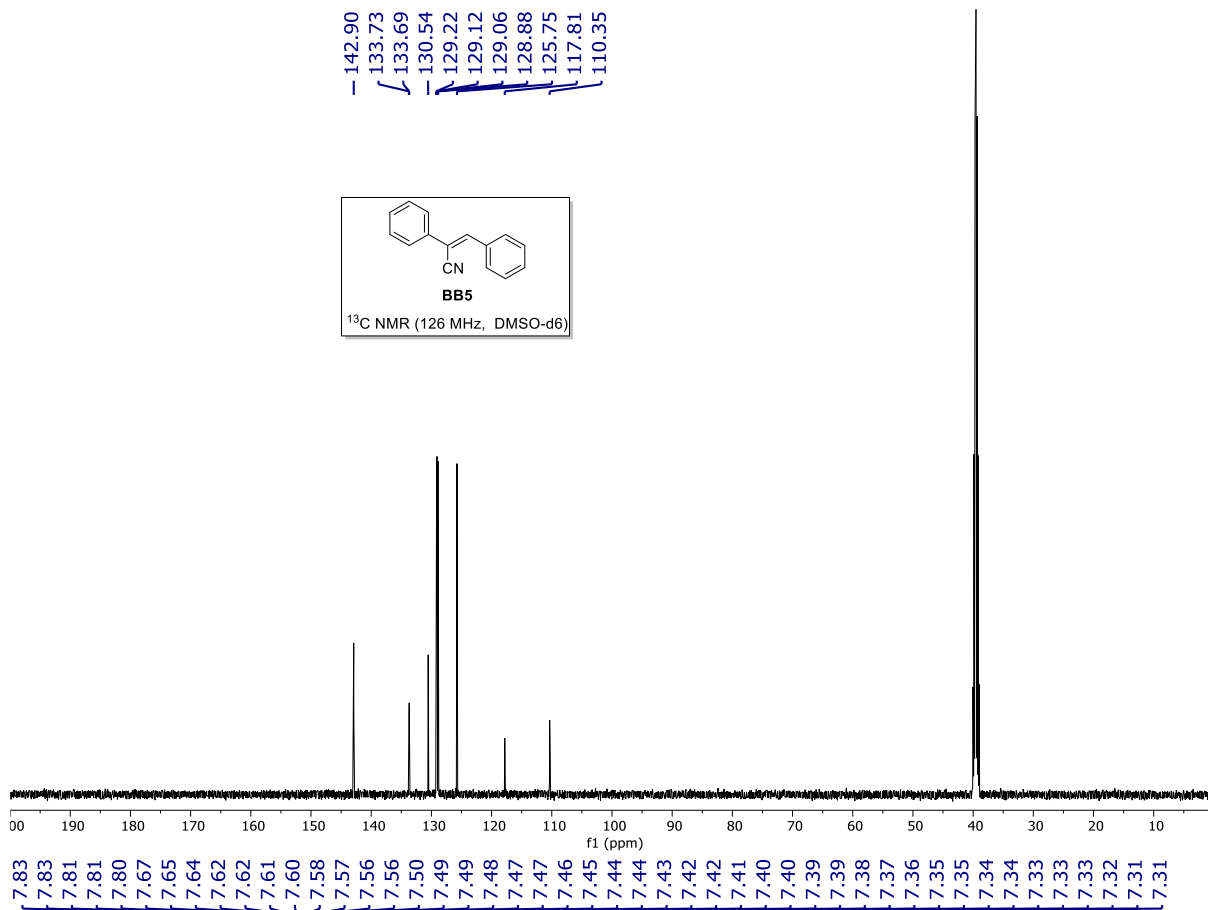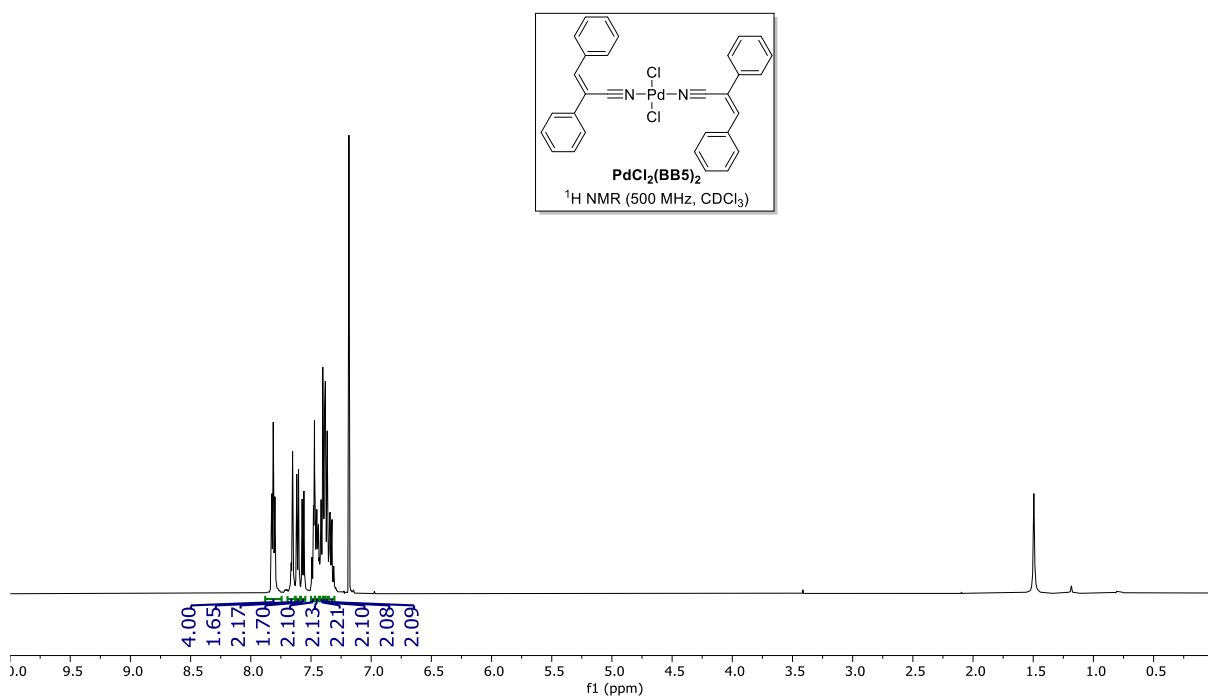

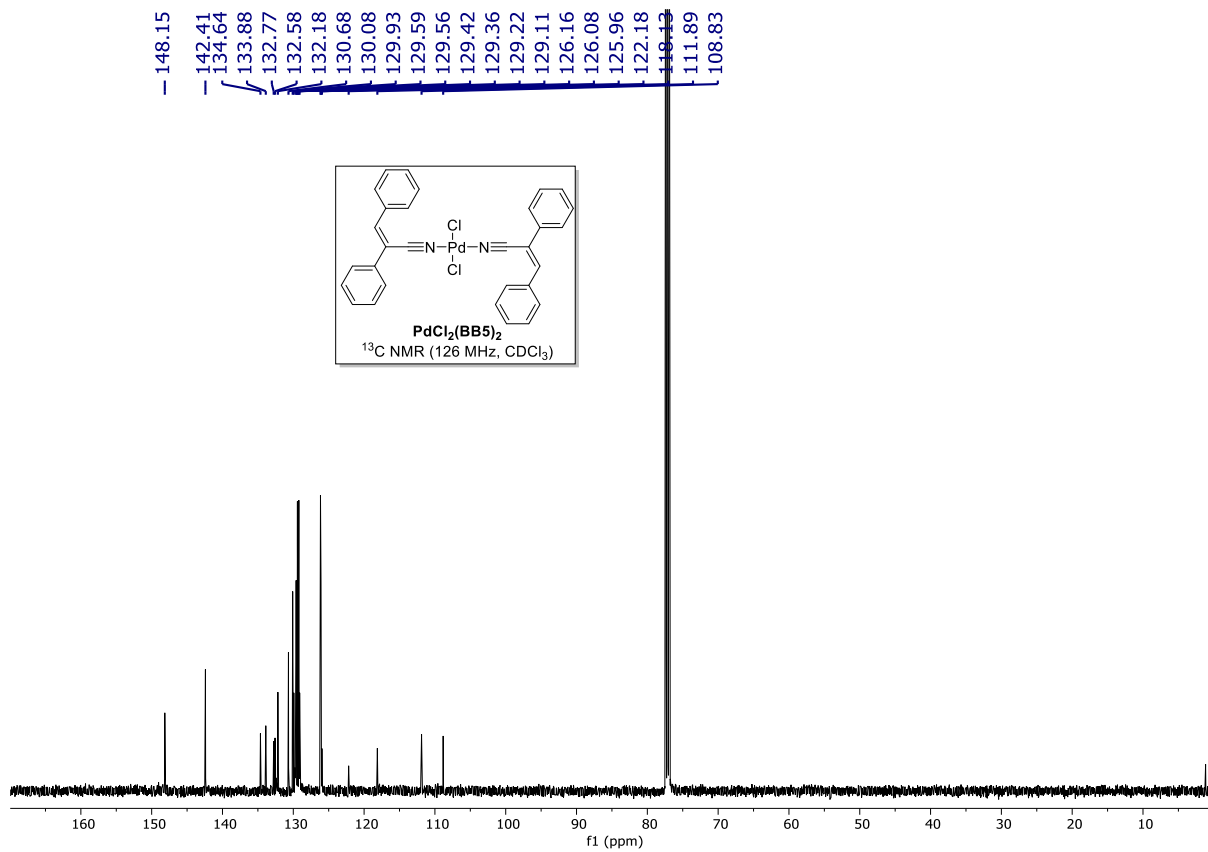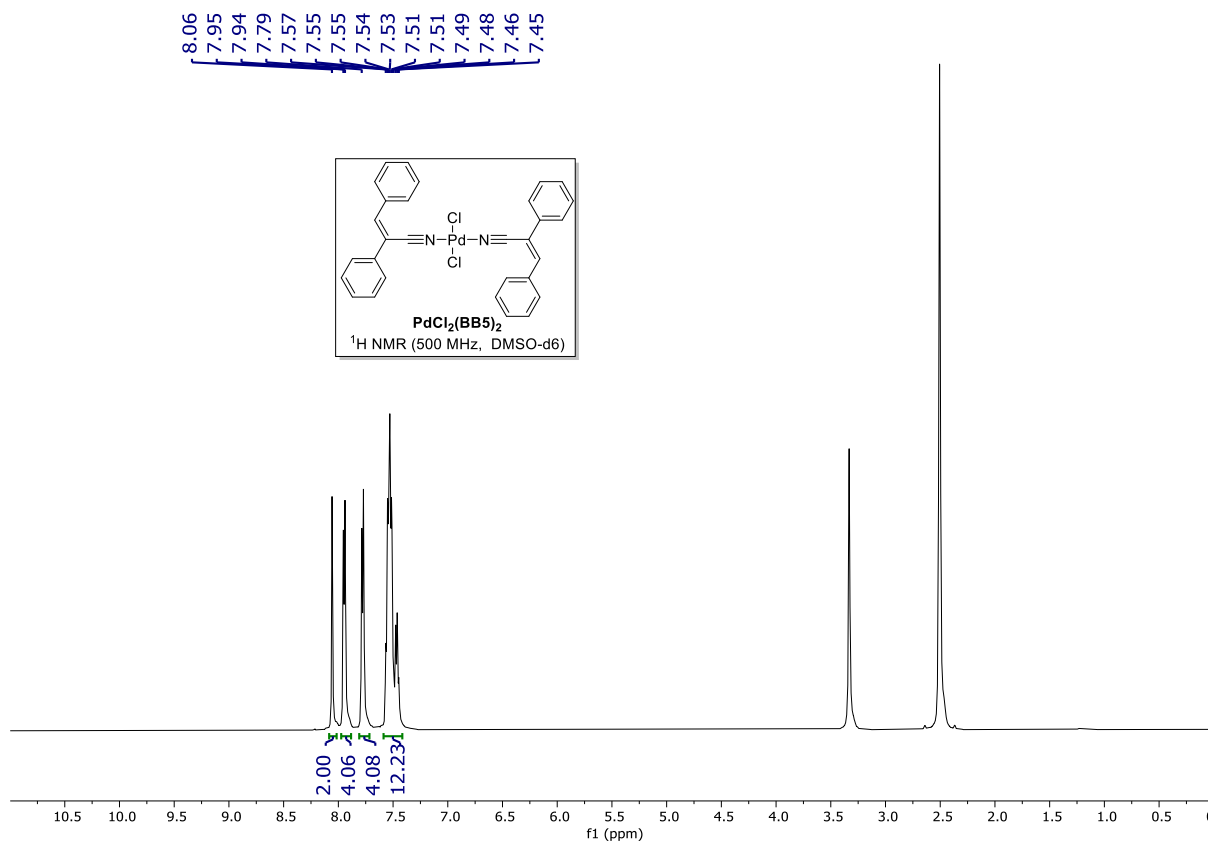

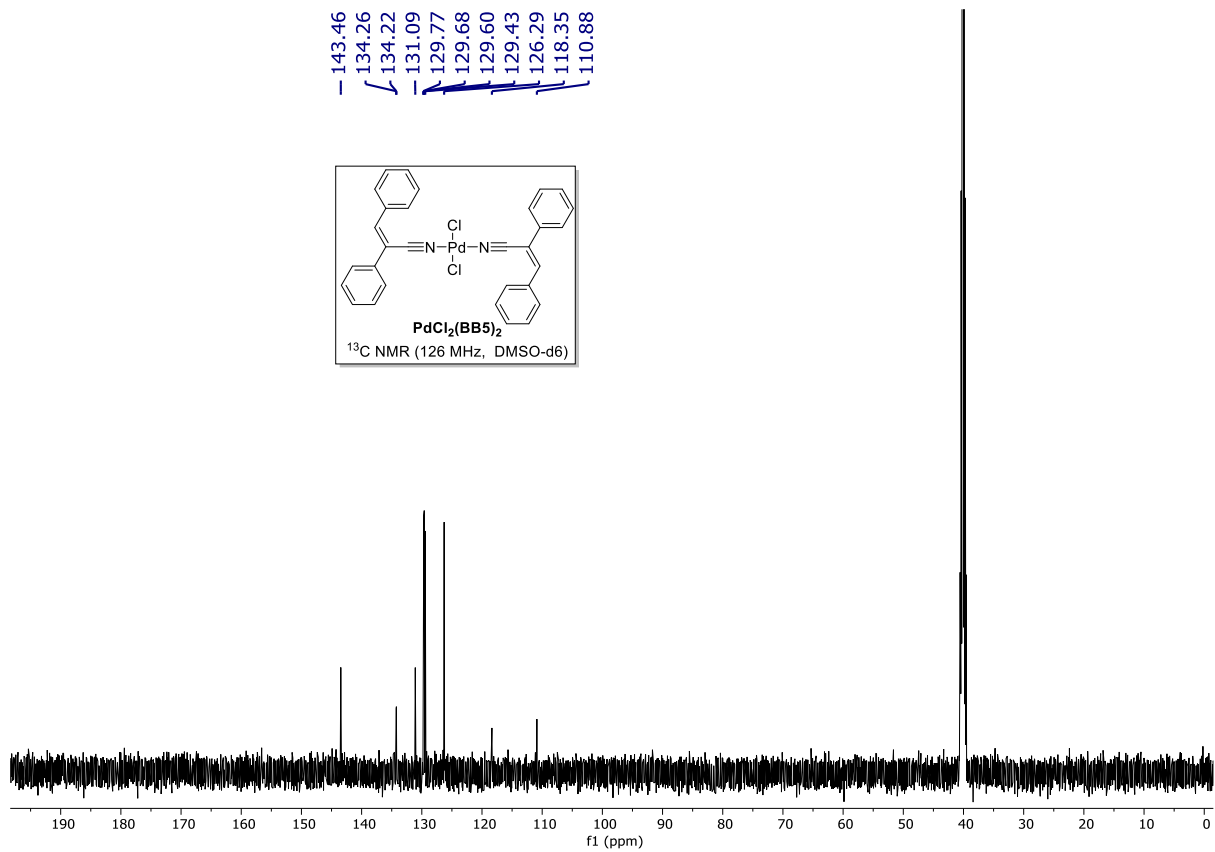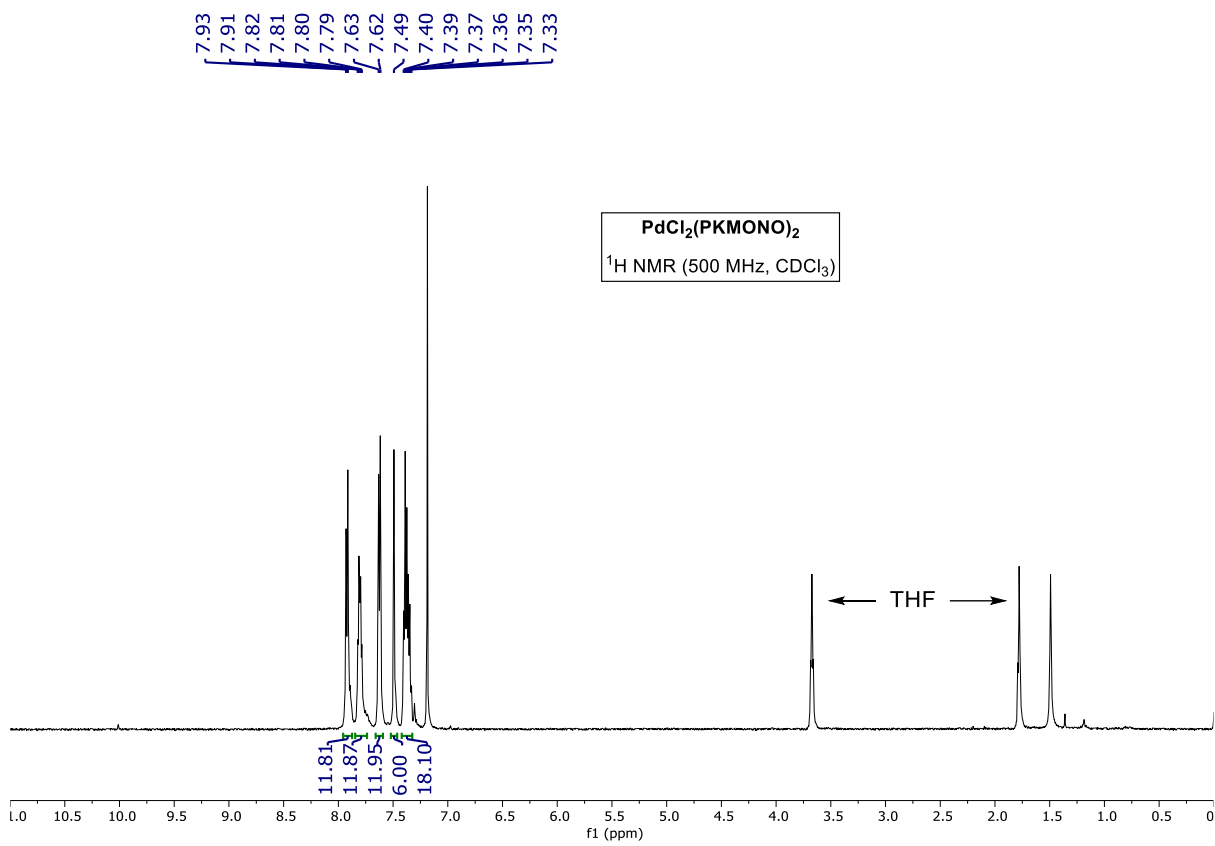

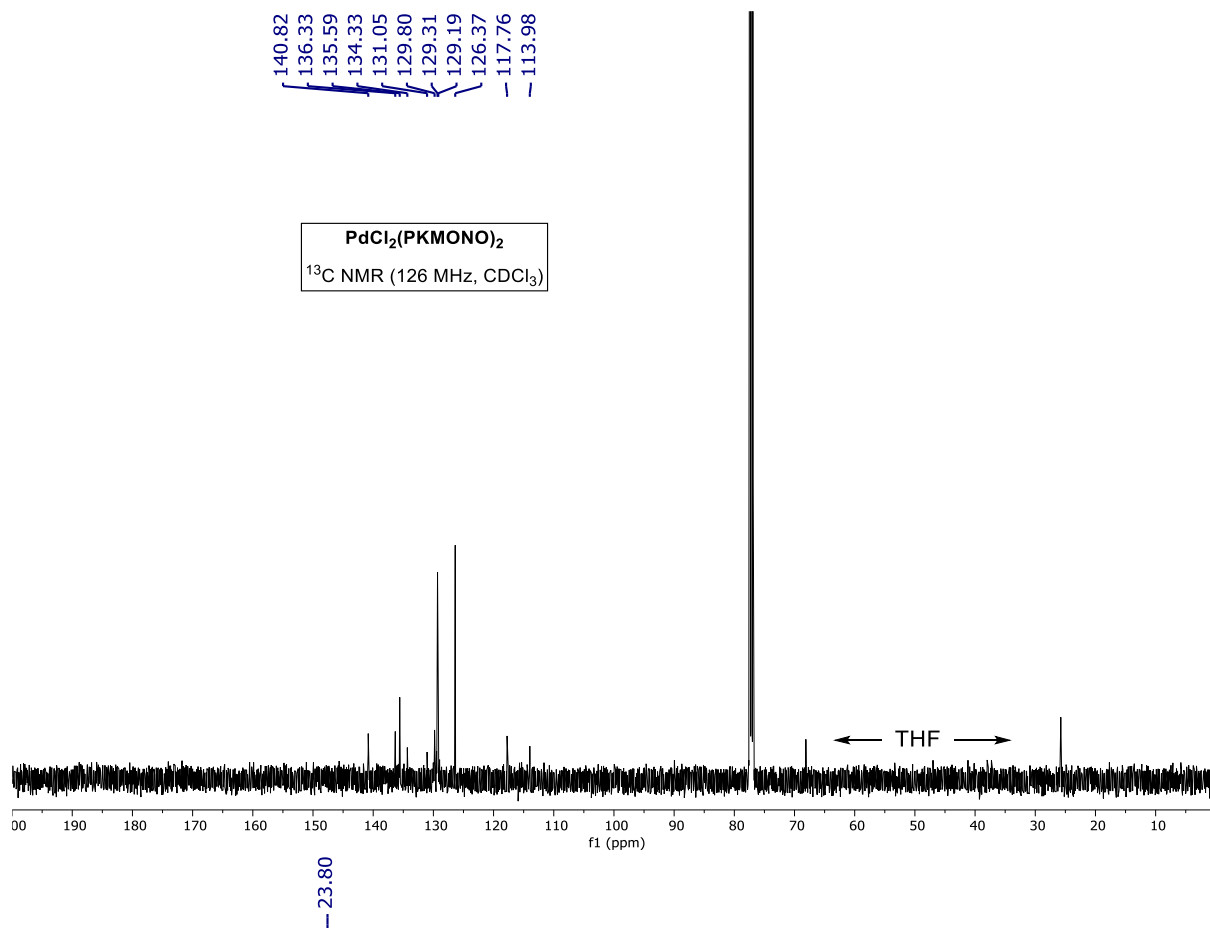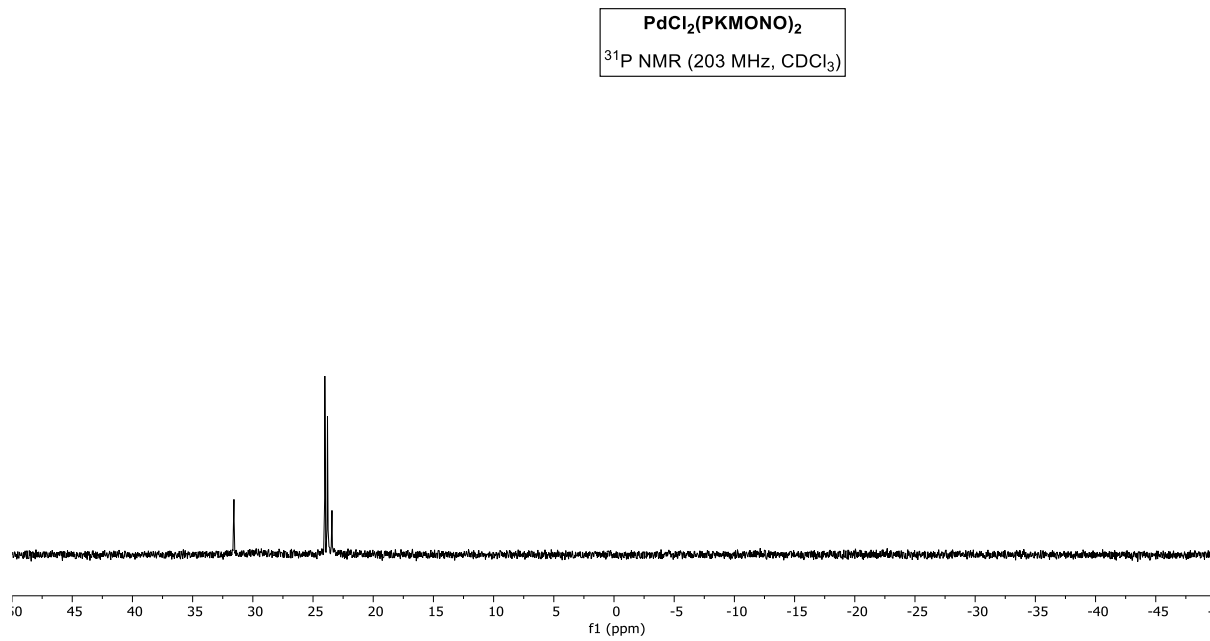



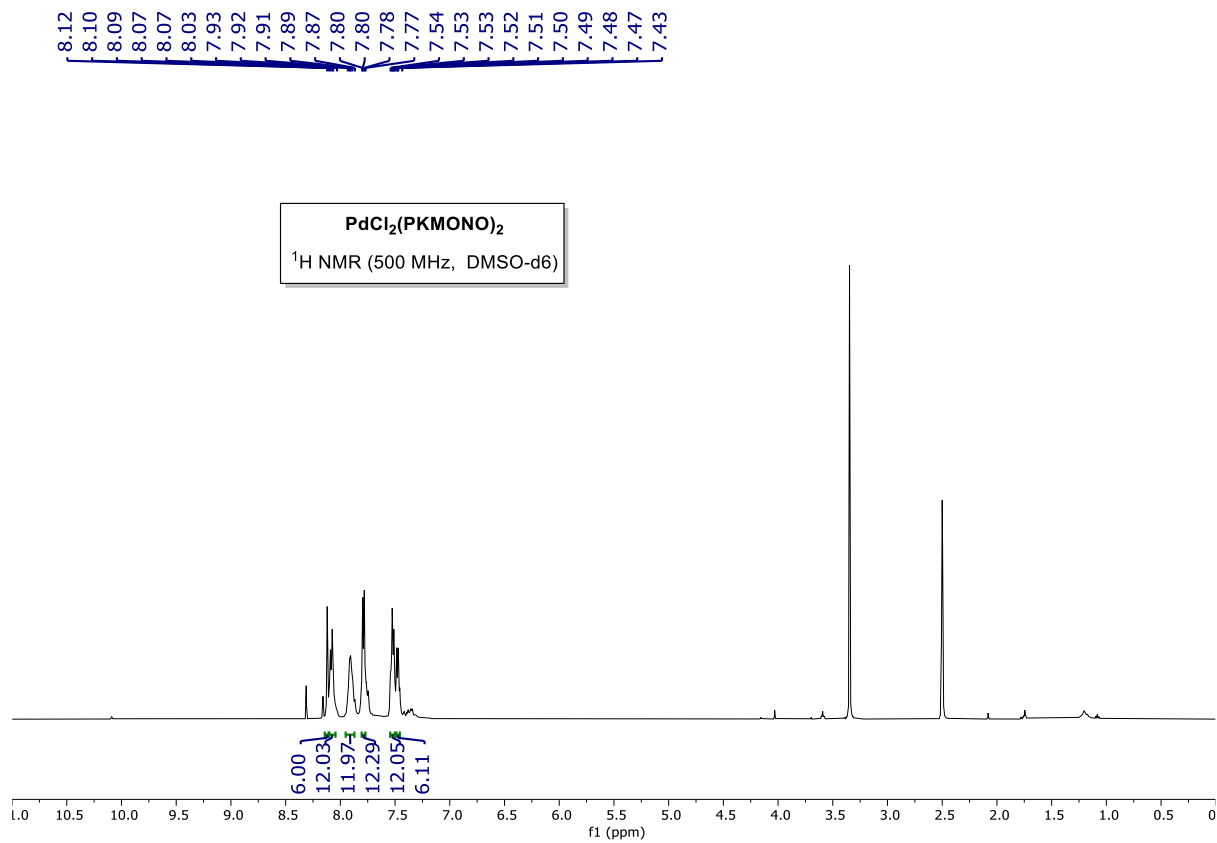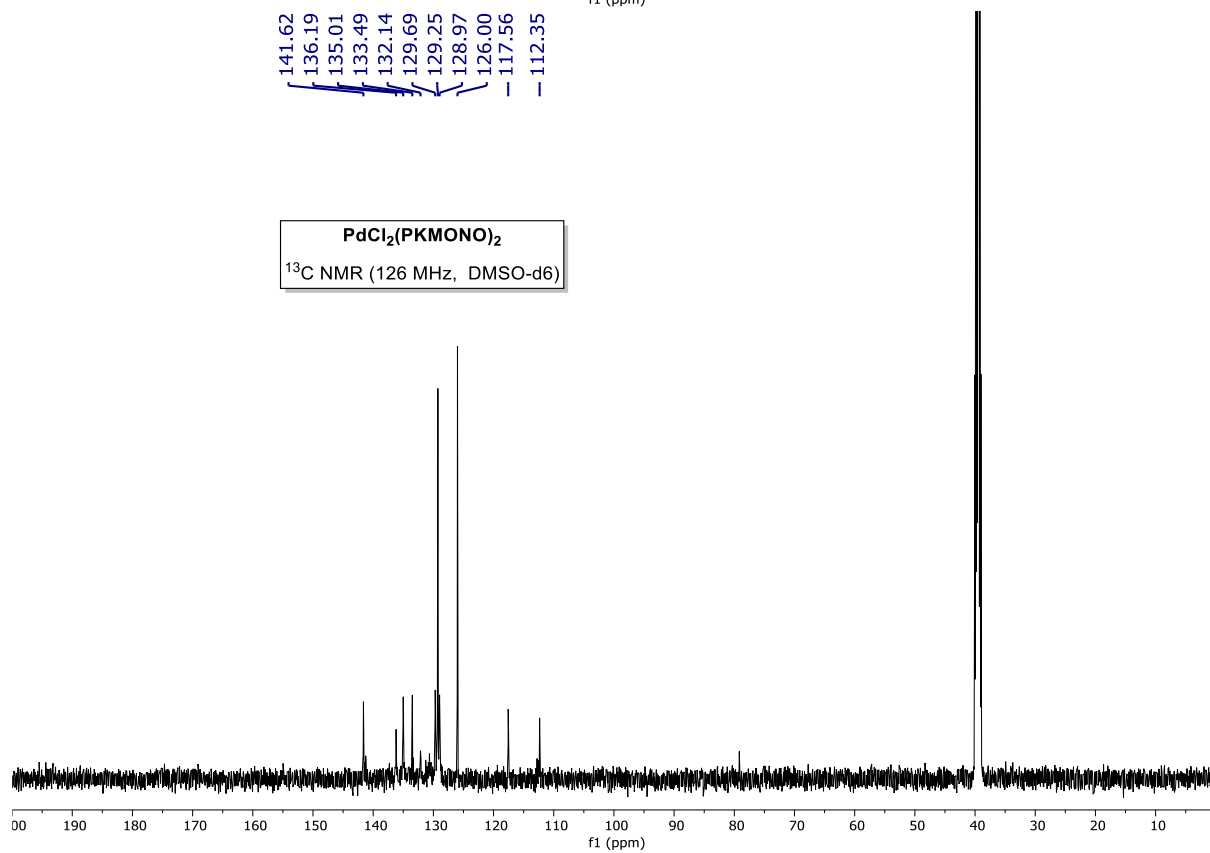

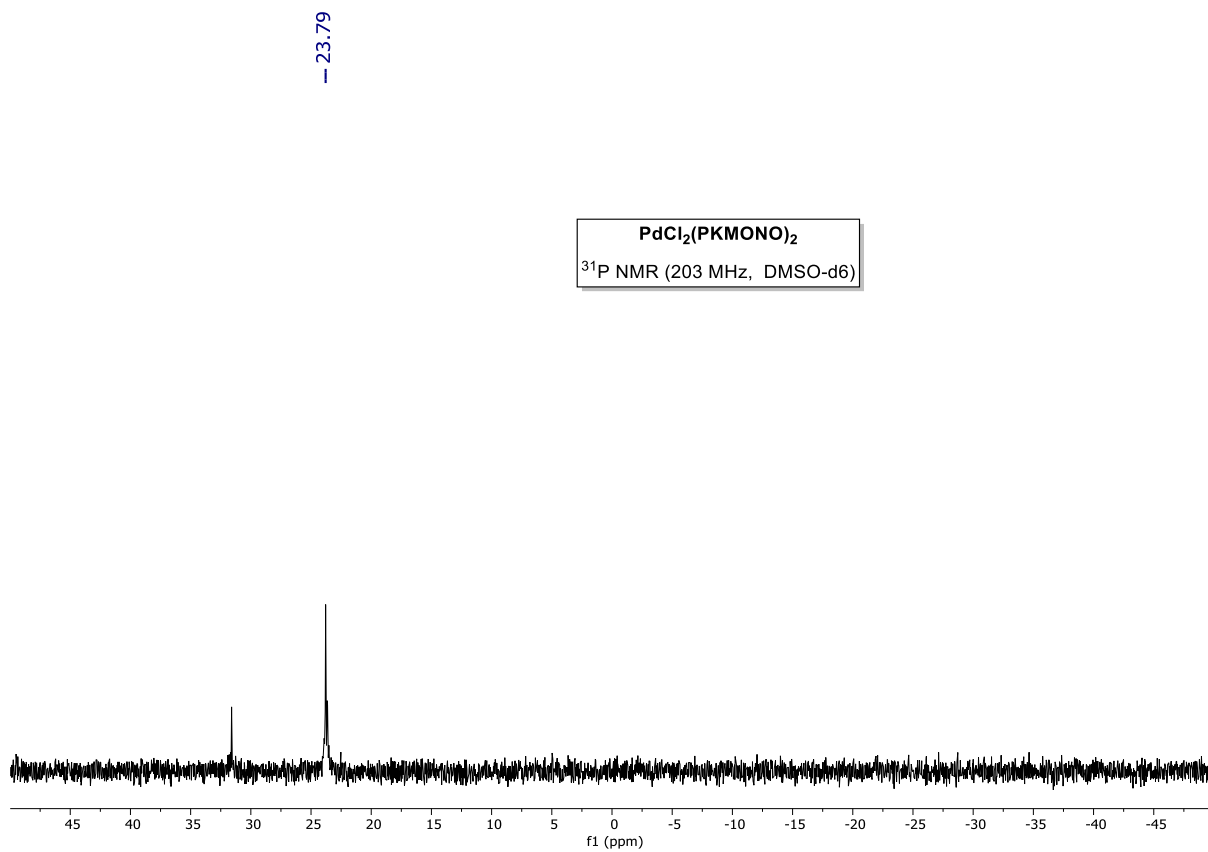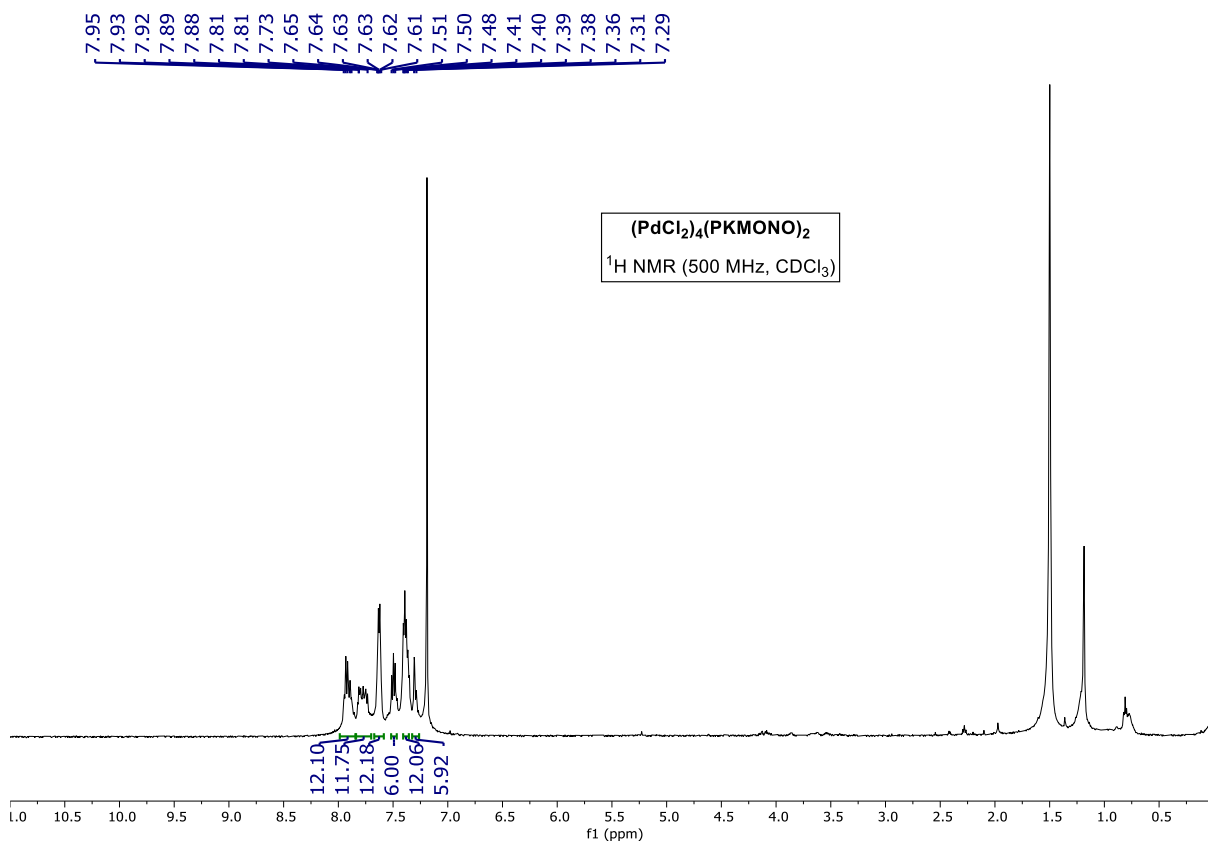

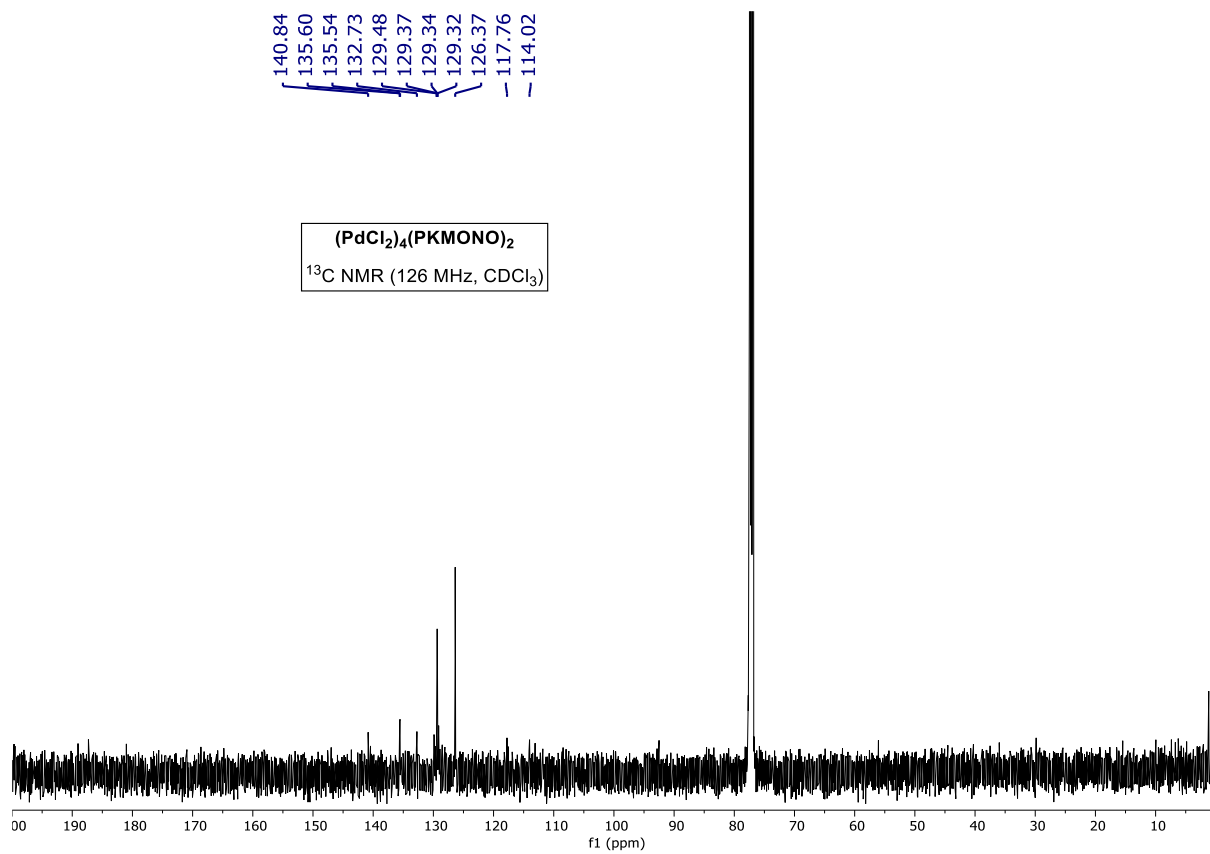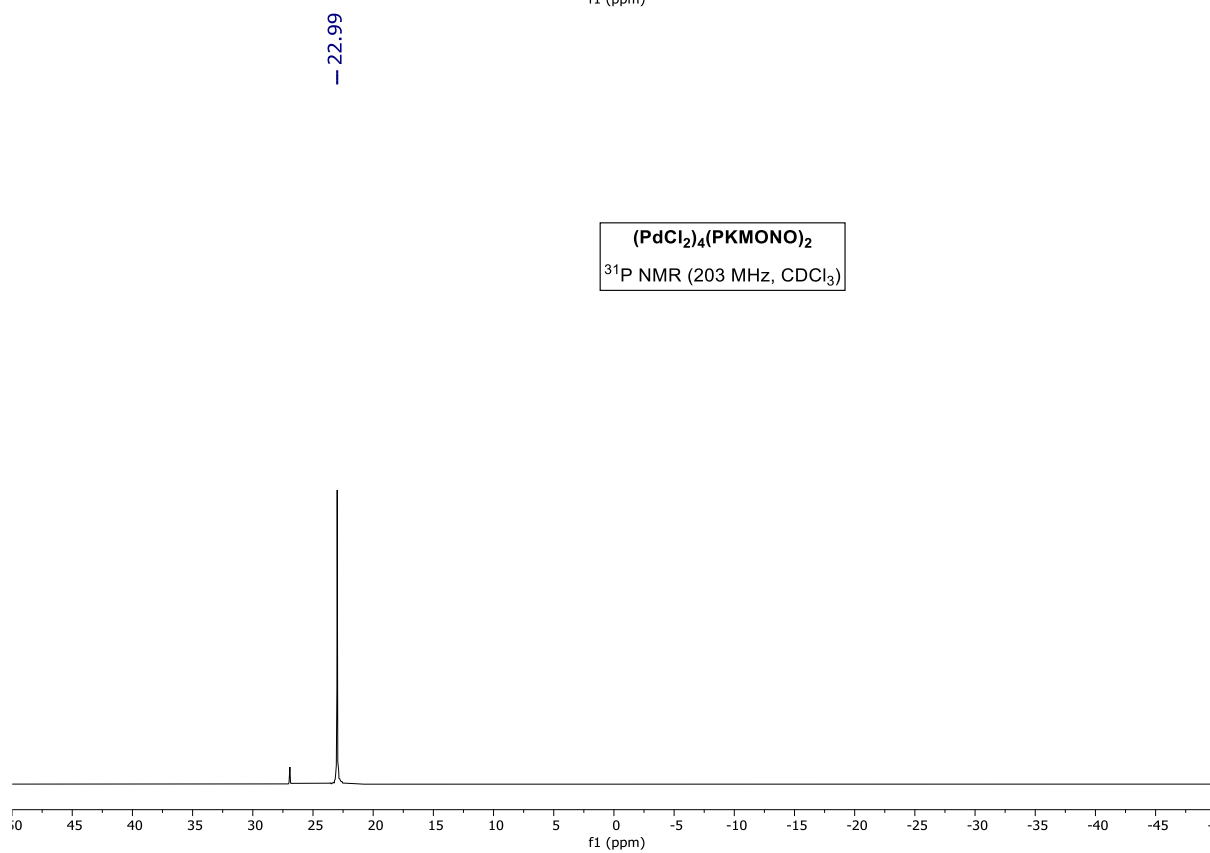

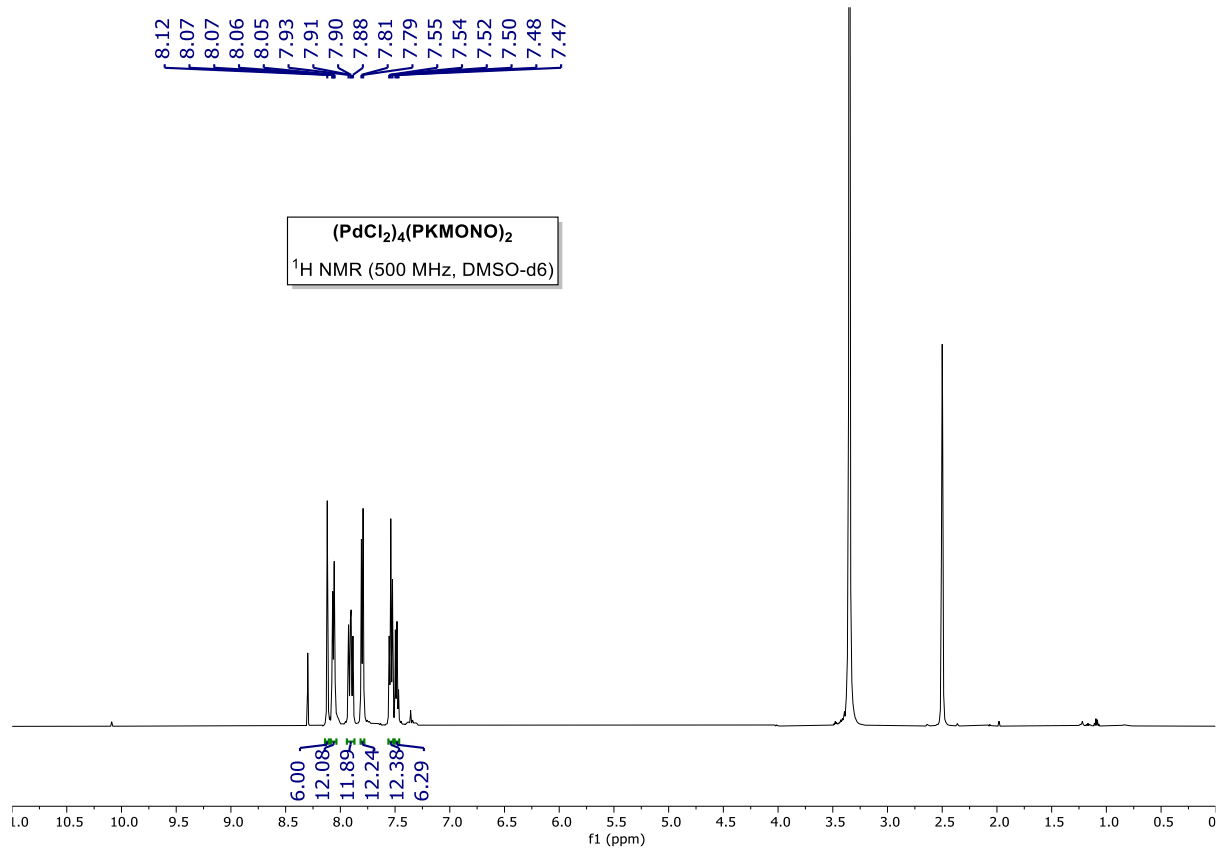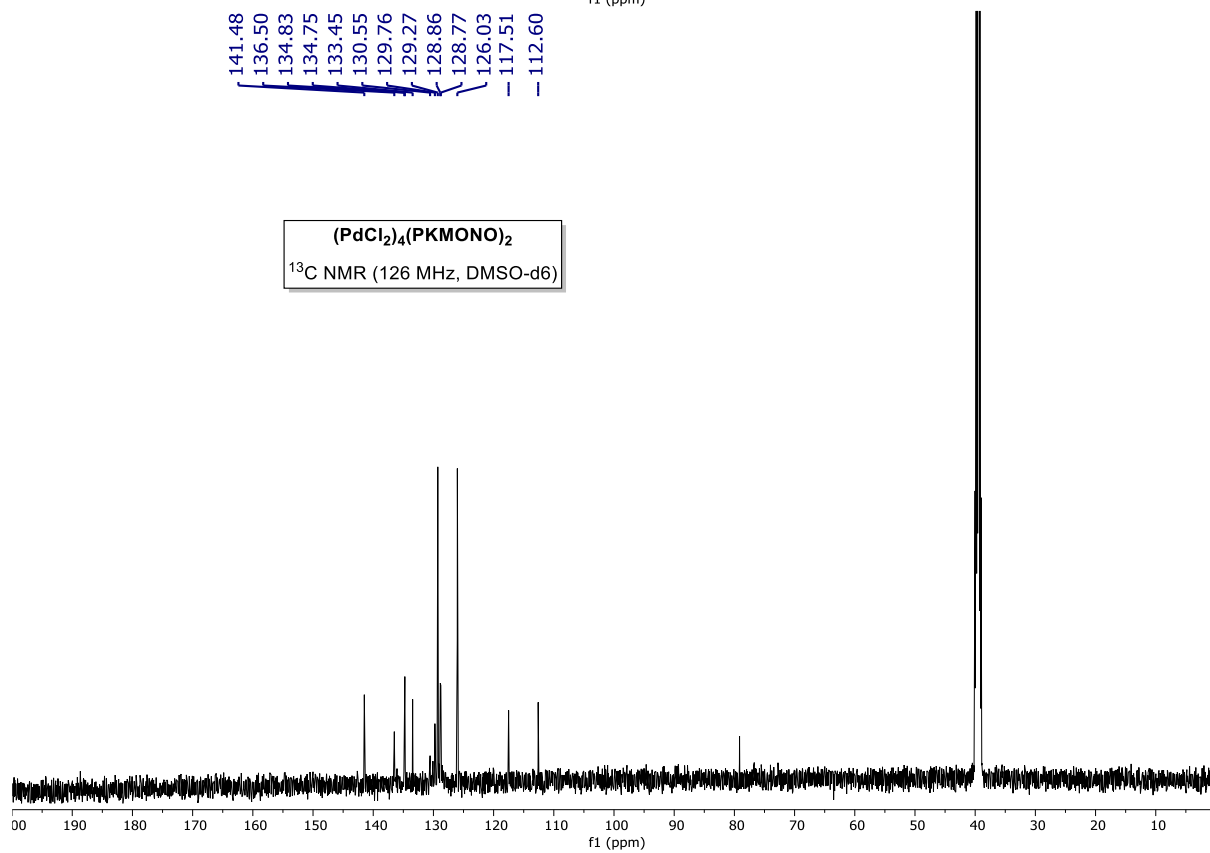

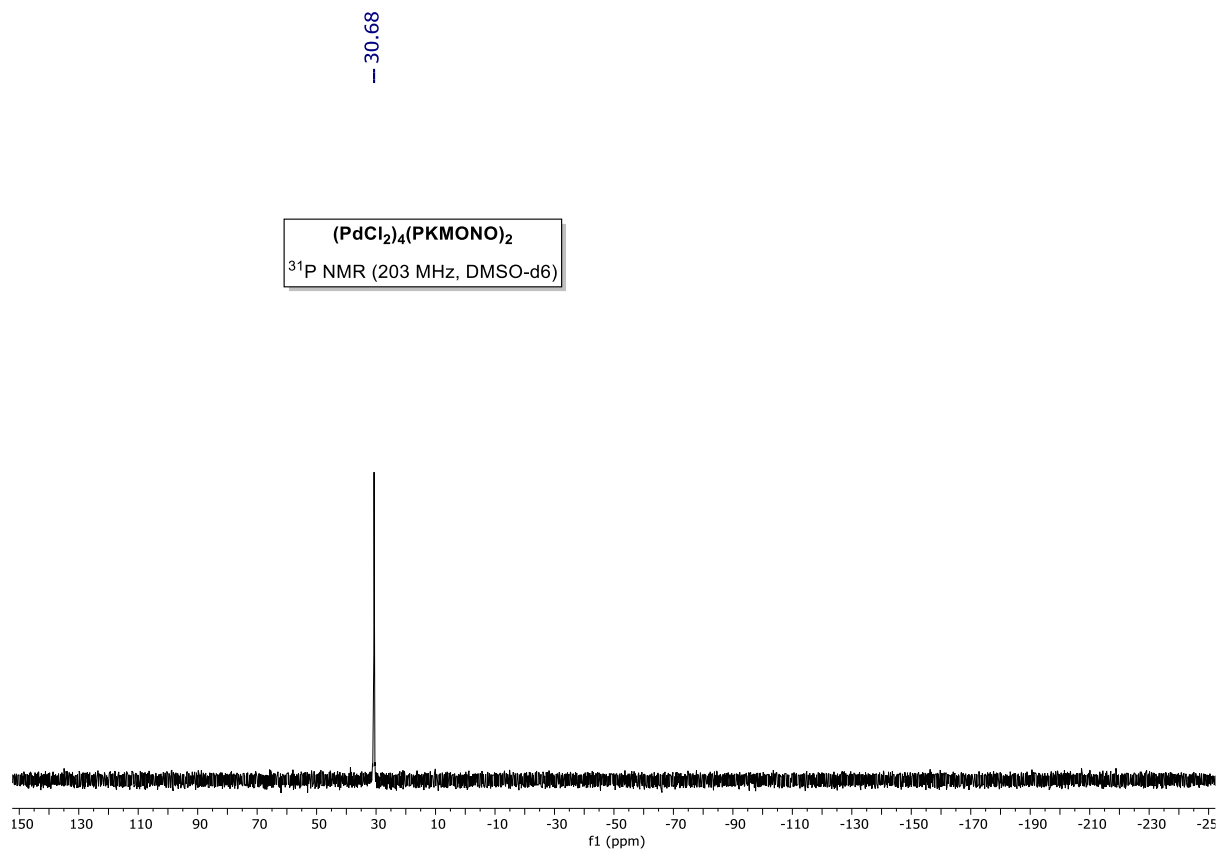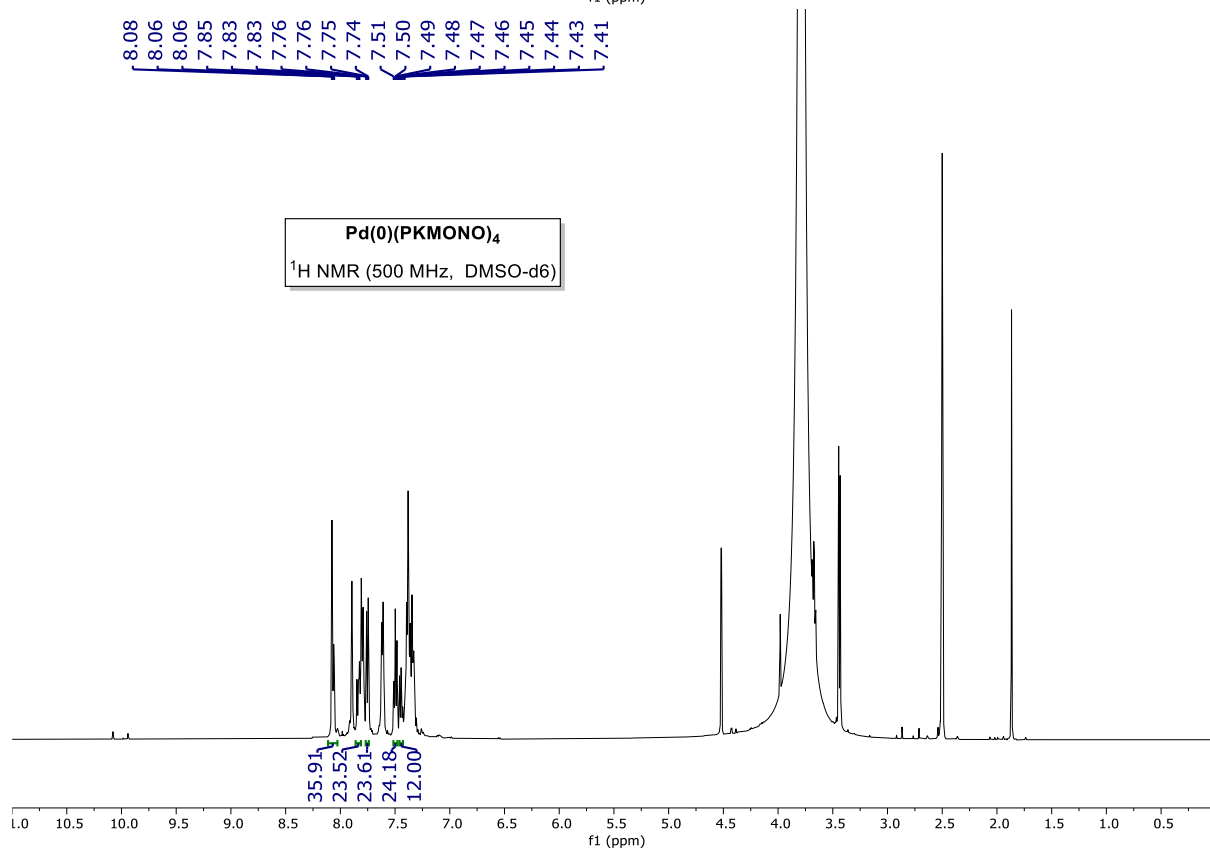

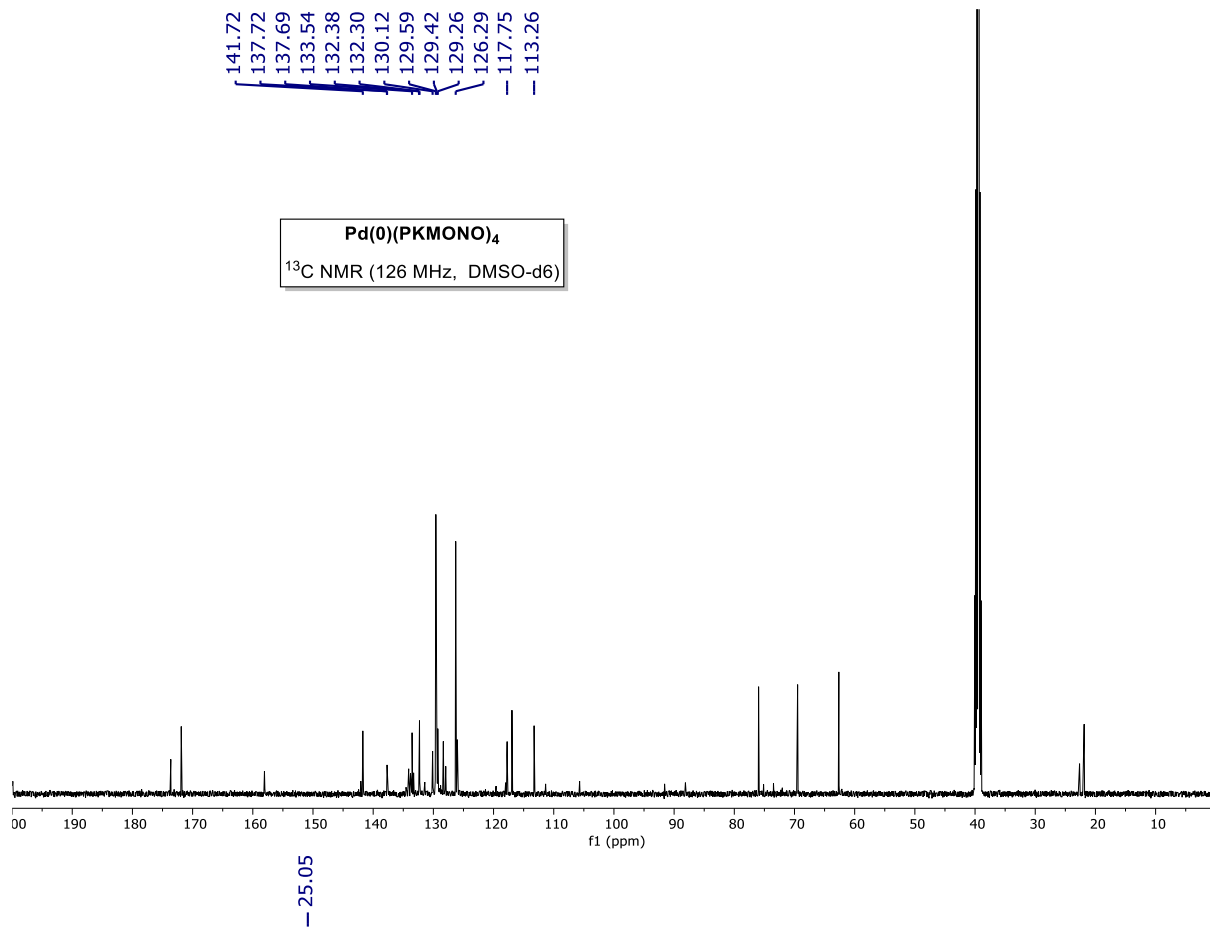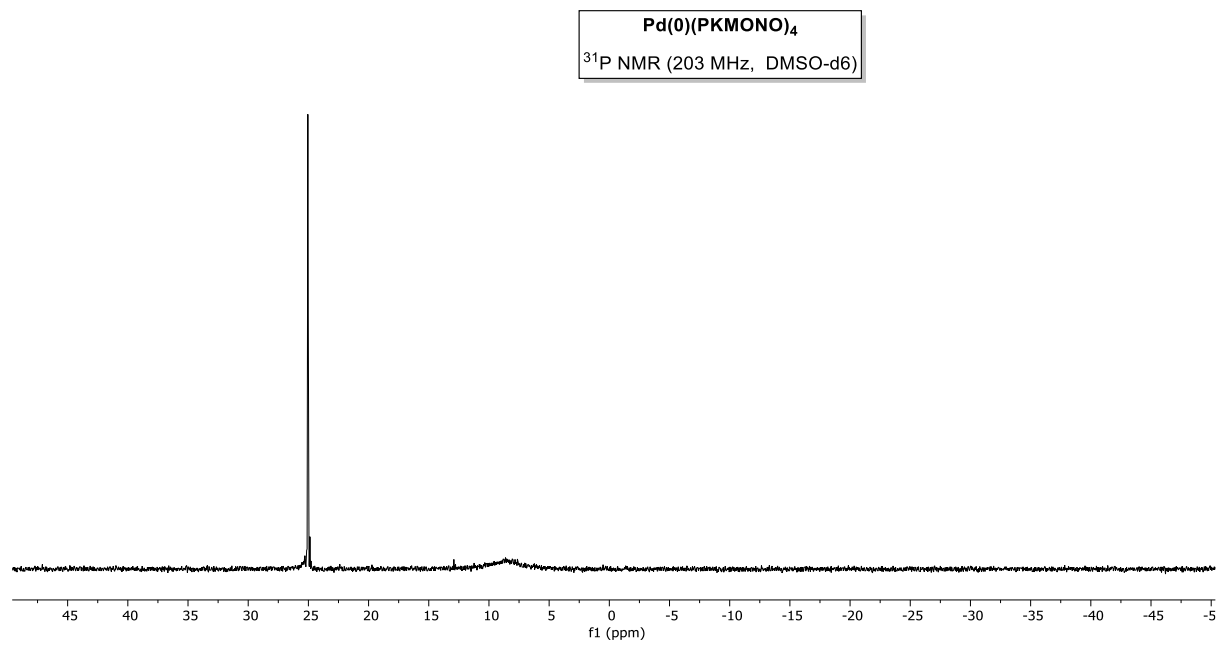

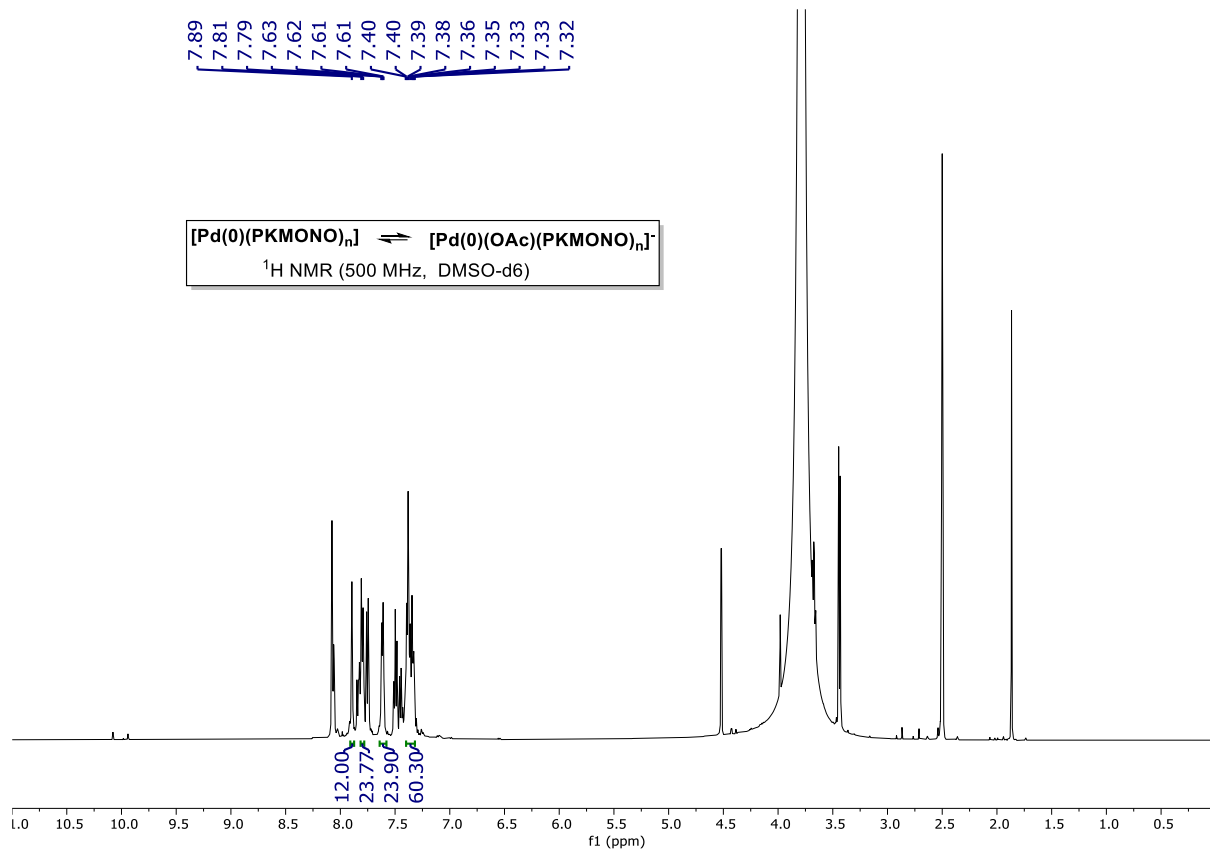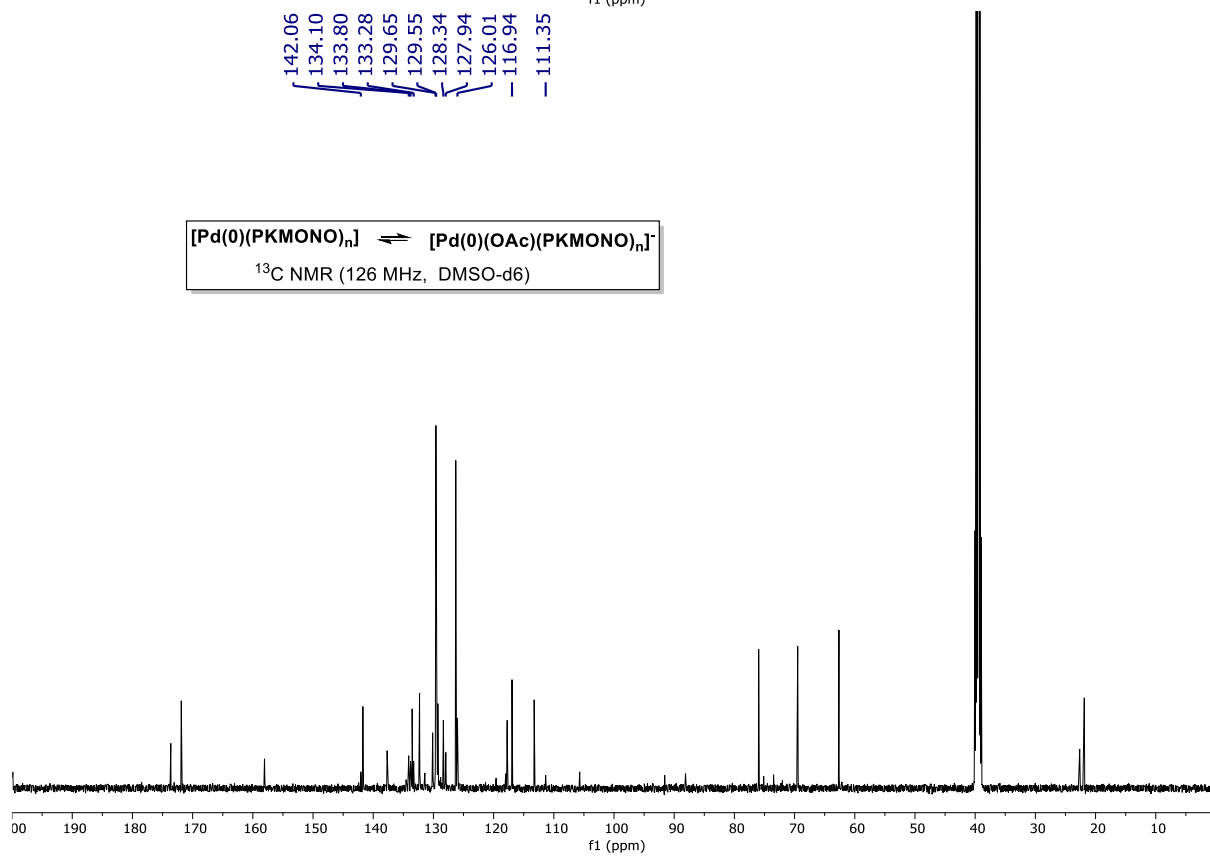

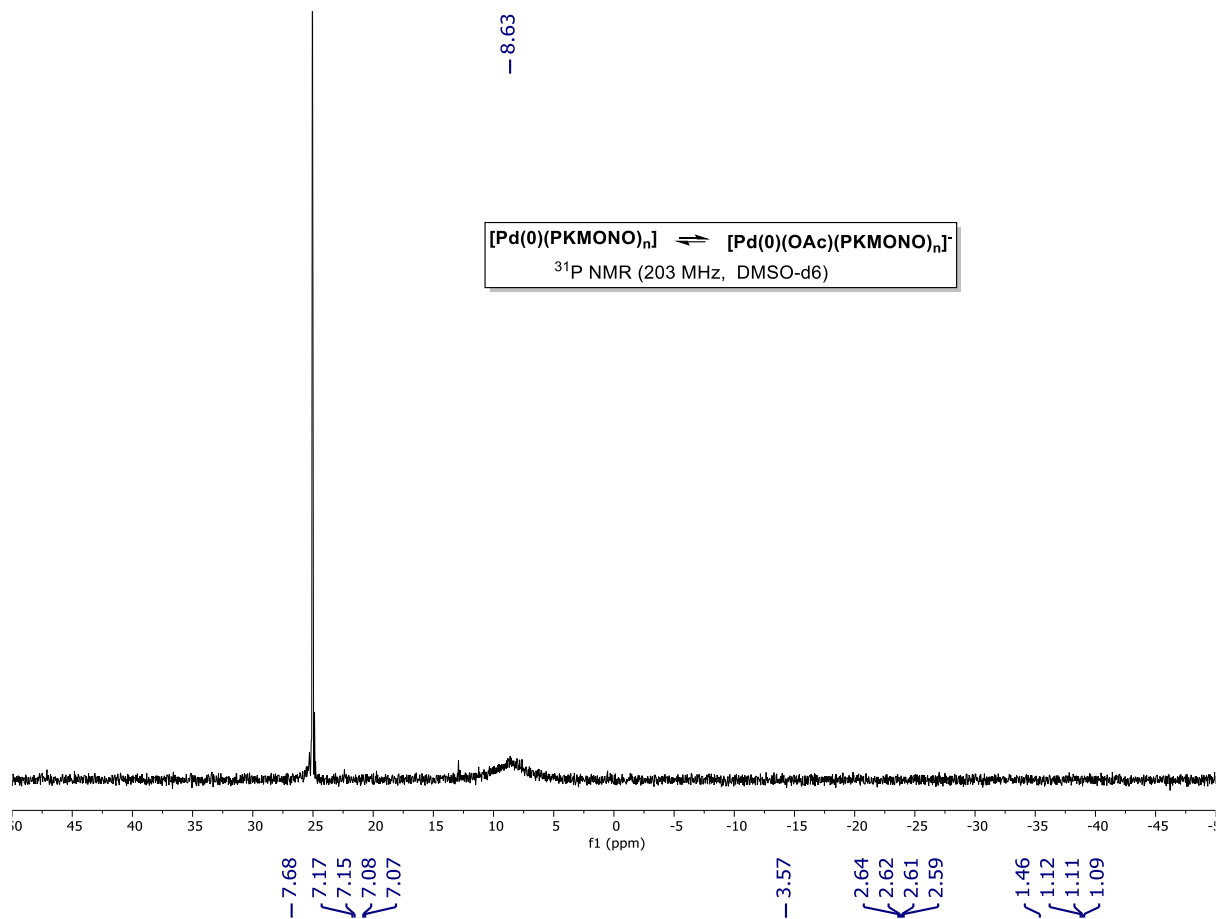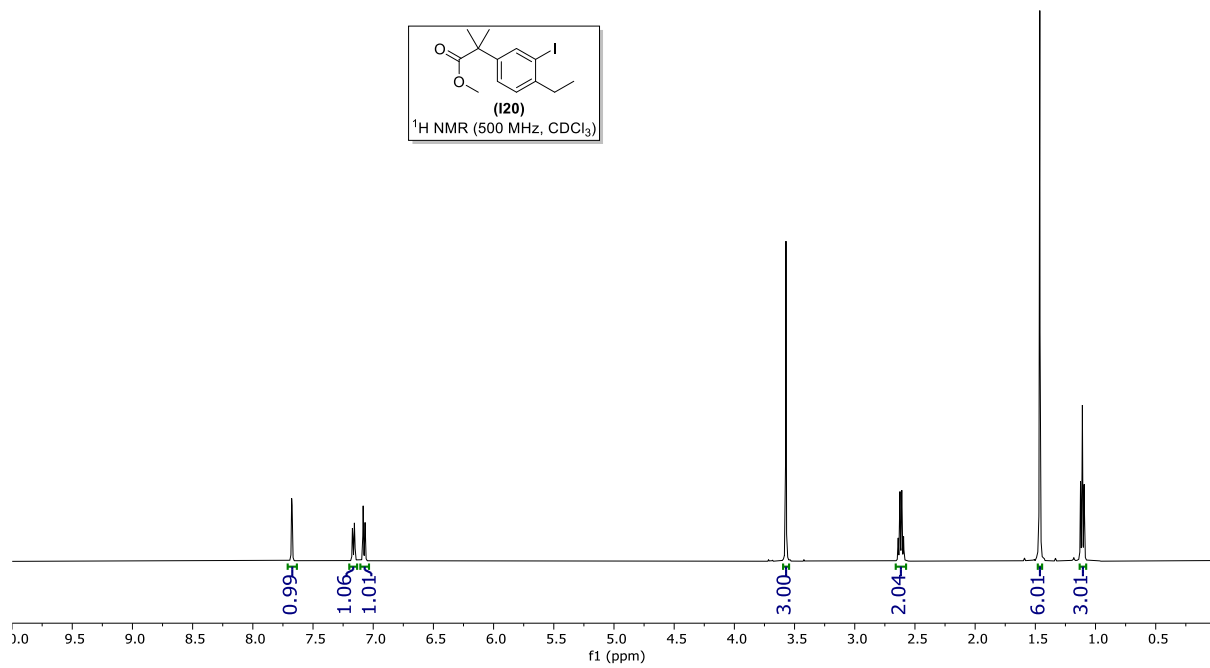



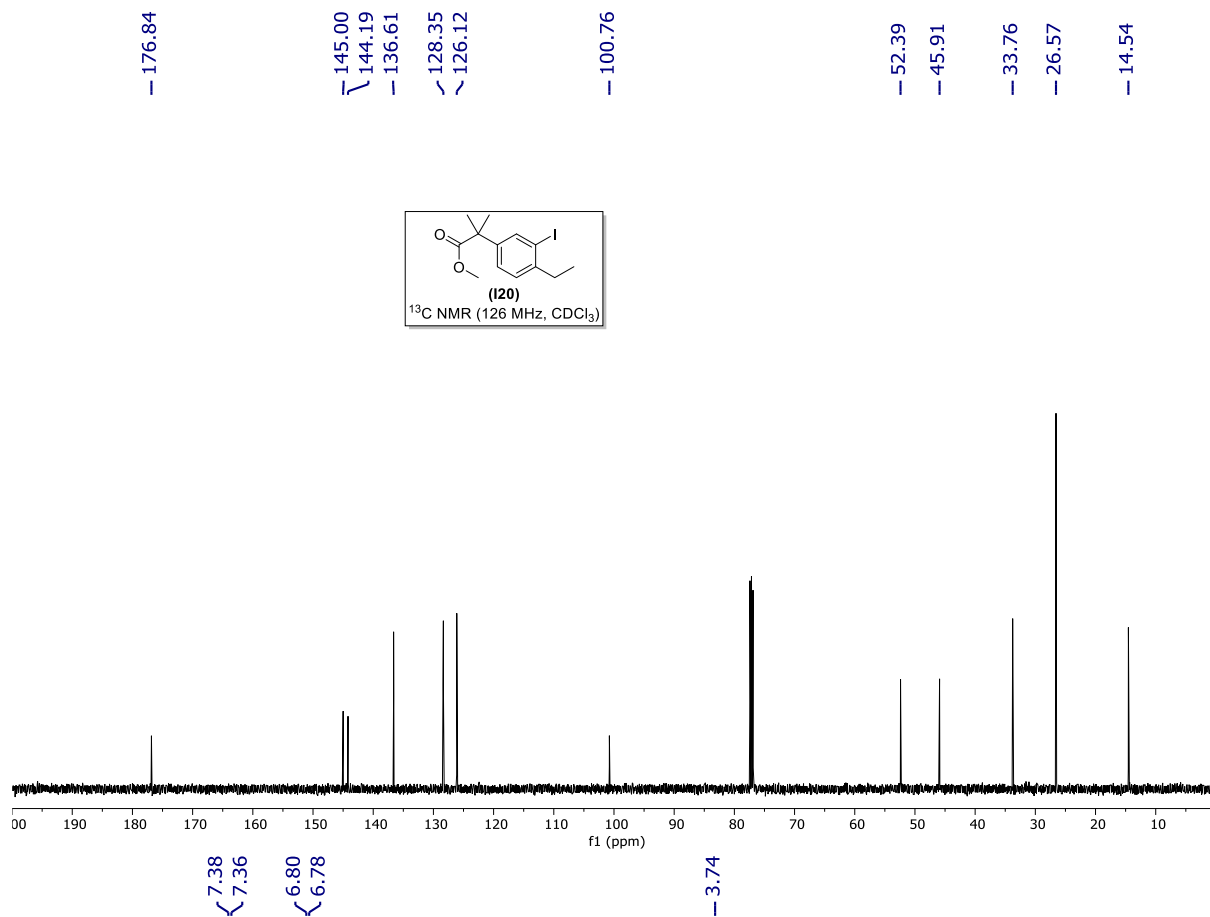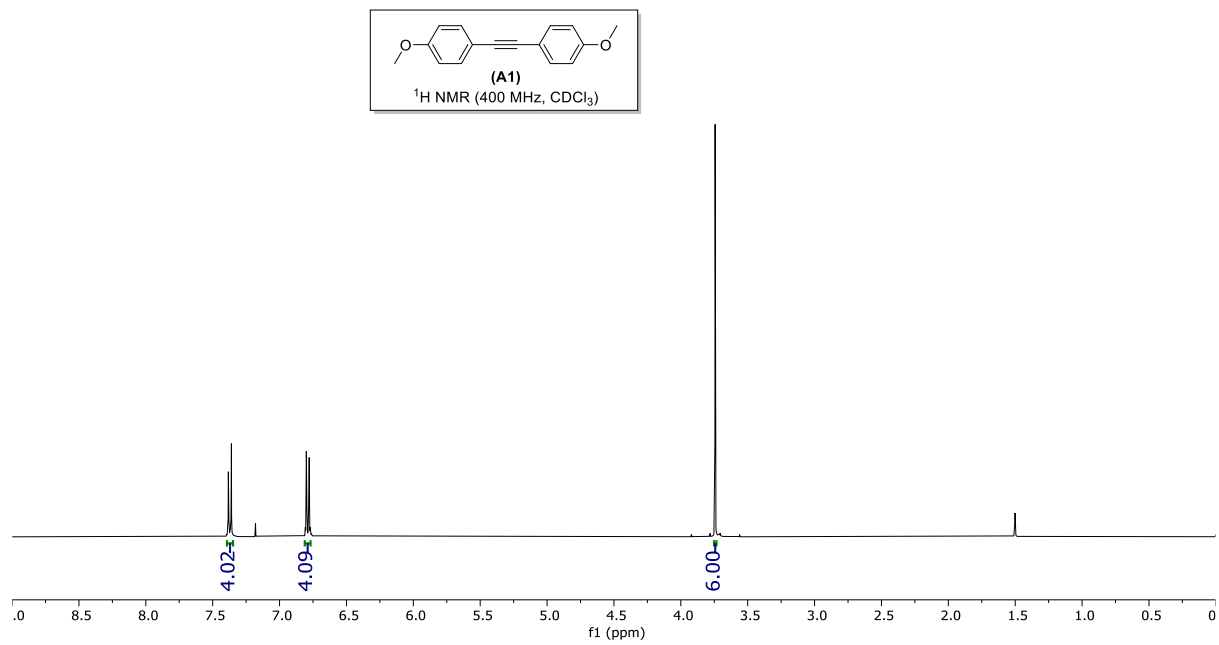

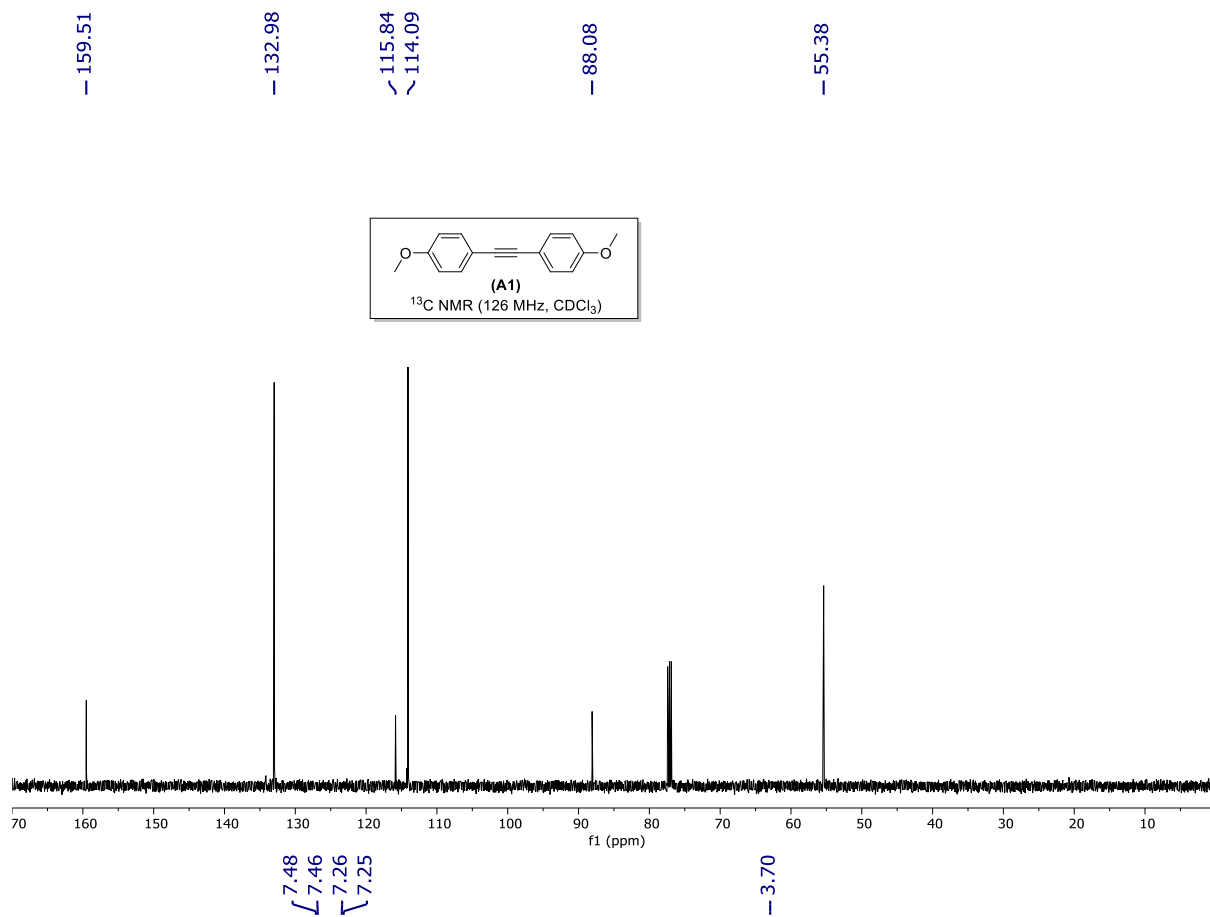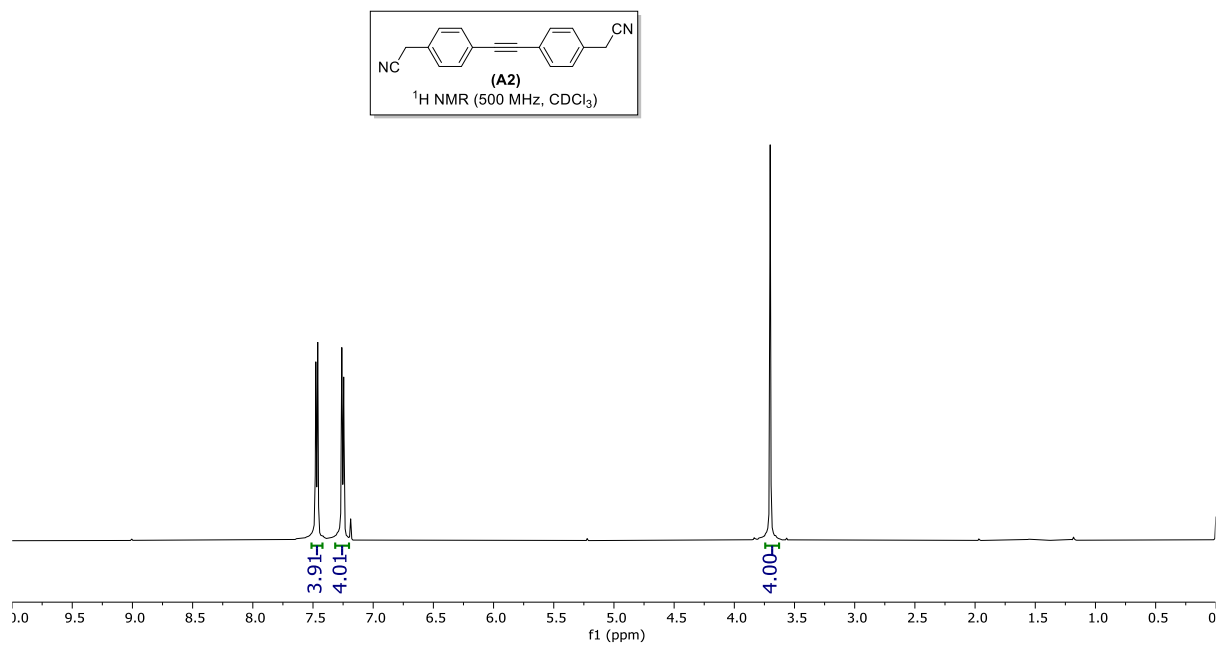

132.43  
130.24  
128.14  
123.08  
117.52

89.44

23.70

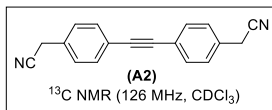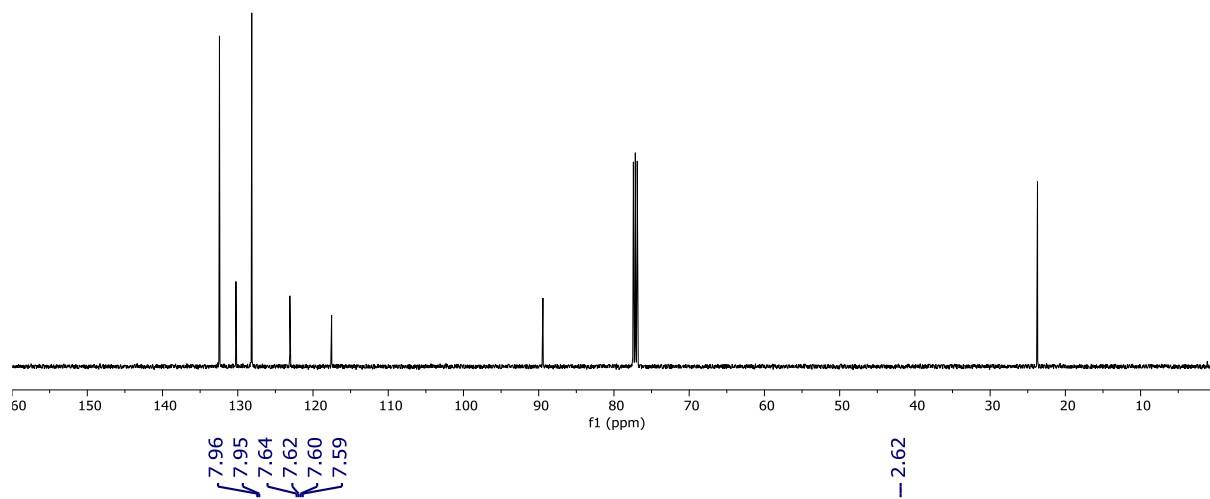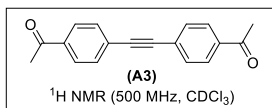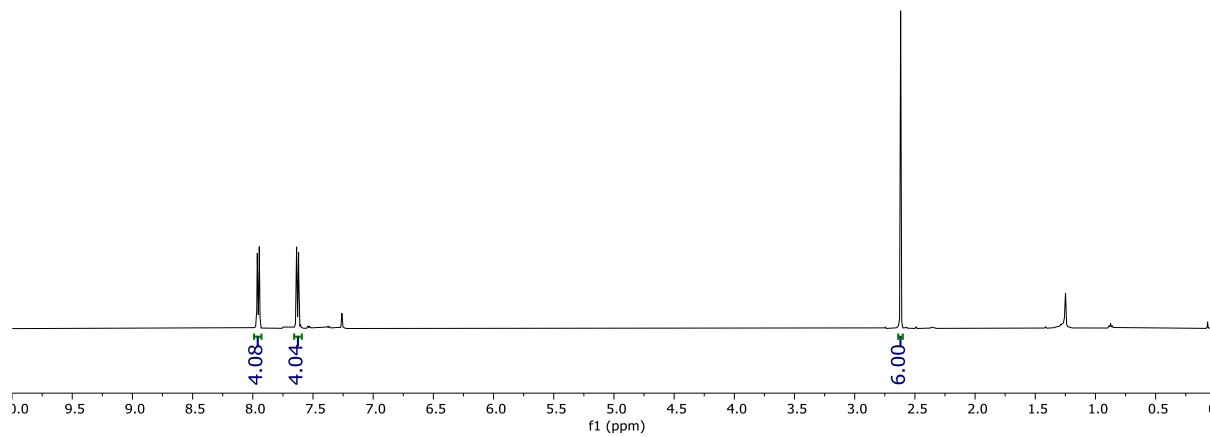

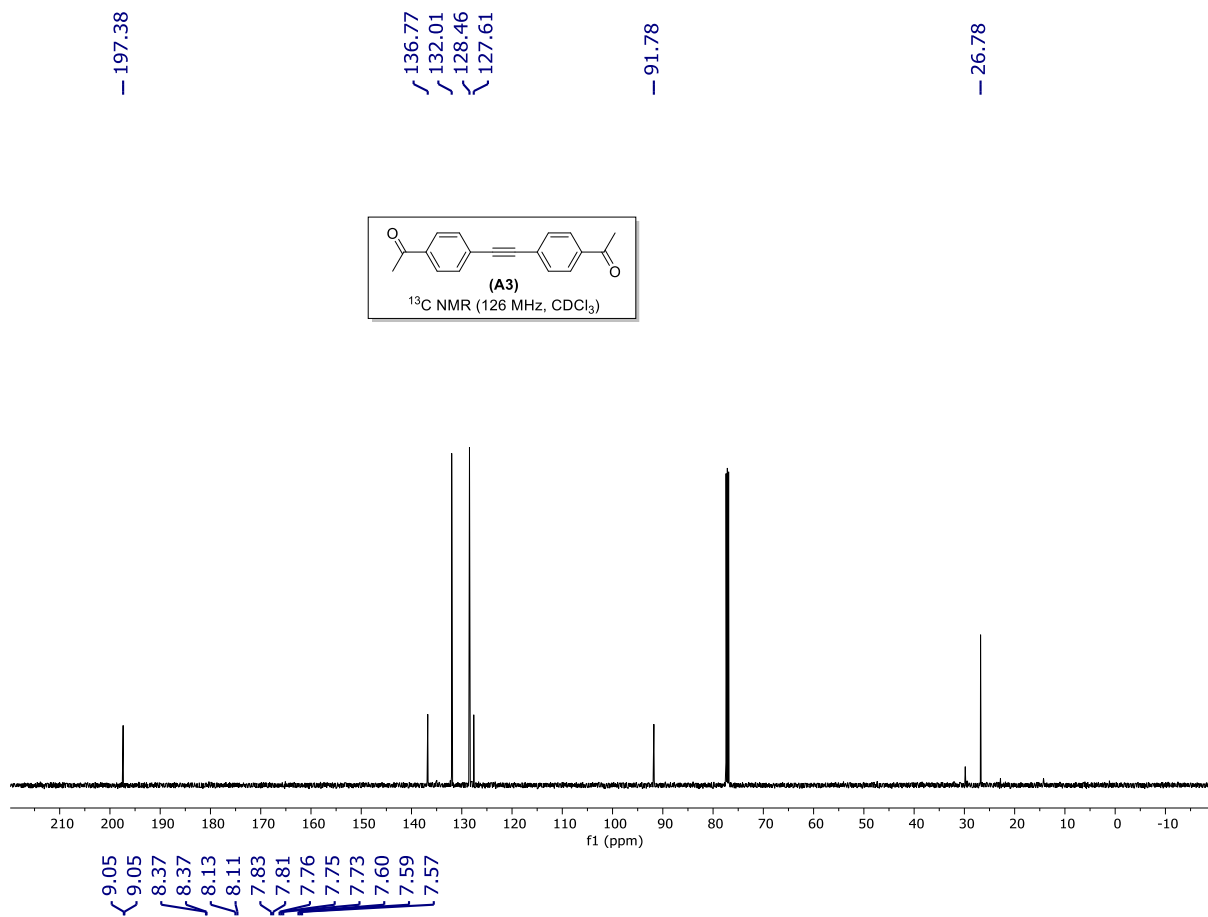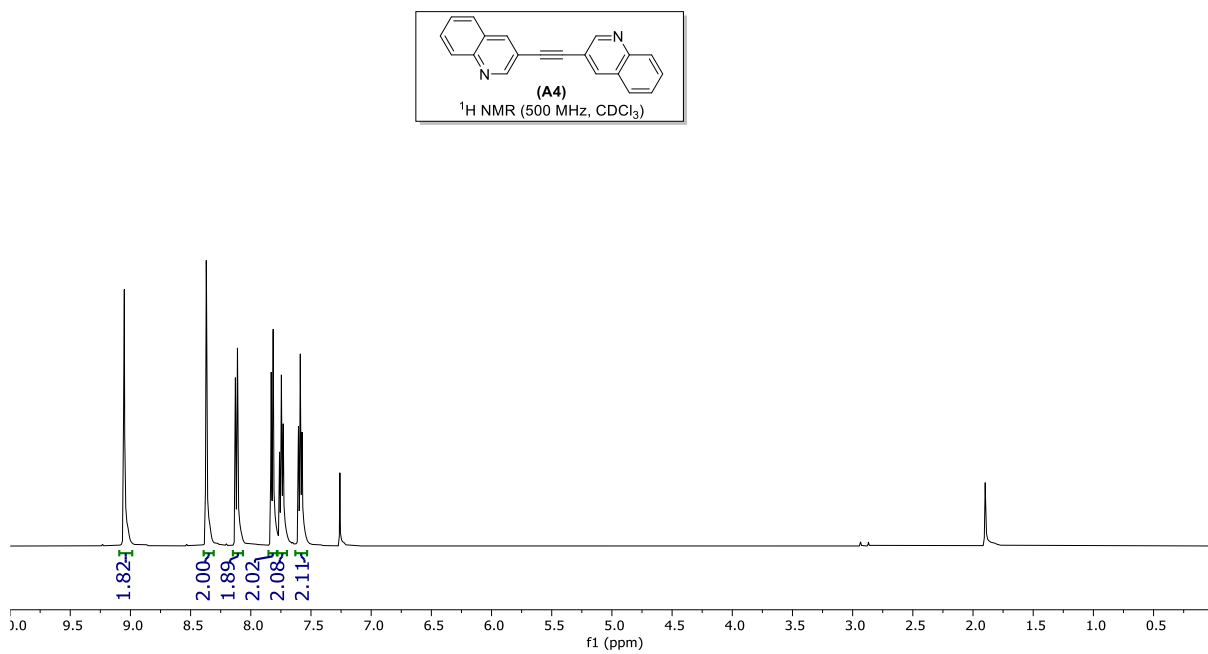

— 151.90  
— 147.02  
— 138.73  
130.48  
129.48  
127.74  
127.52  
127.21  
— 116.81  
  
— 89.91

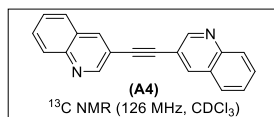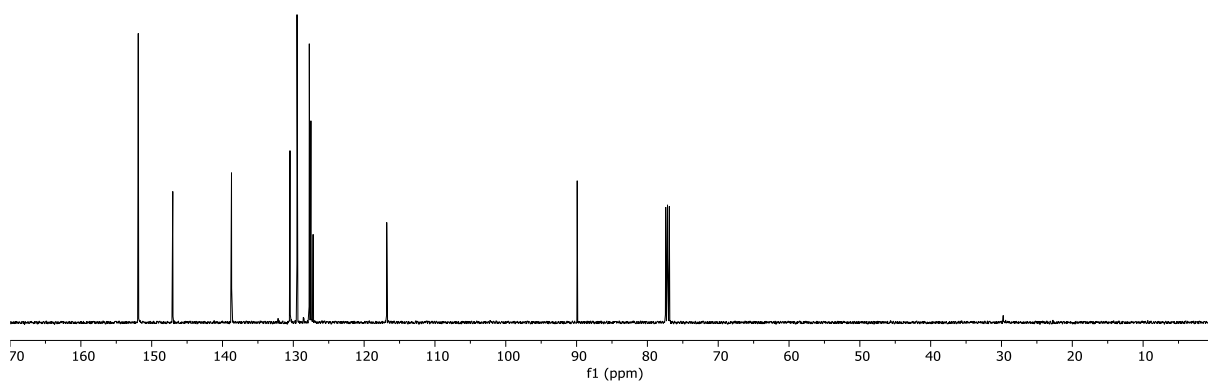

7.24  
7.23  
7.21  
7.20  
6.95  
6.94  
6.93  
6.93

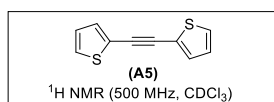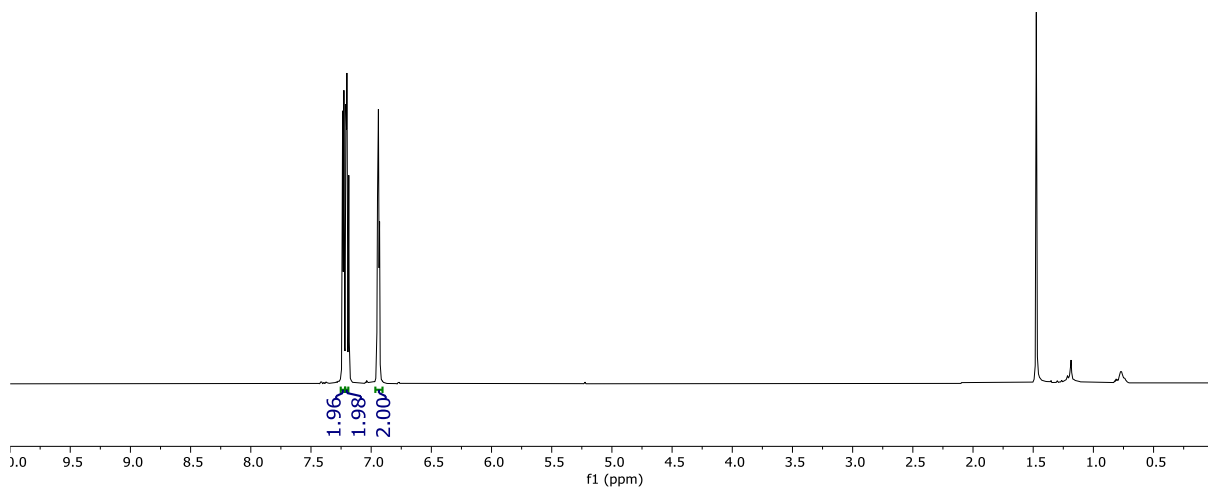

~ 132.24  
~ 127.74  
~ 127.28  
~ 123.05

— 86.33

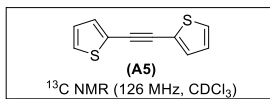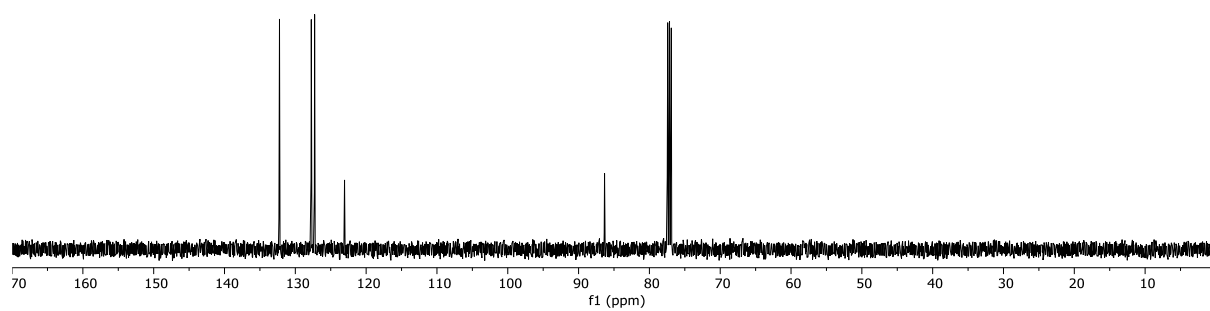

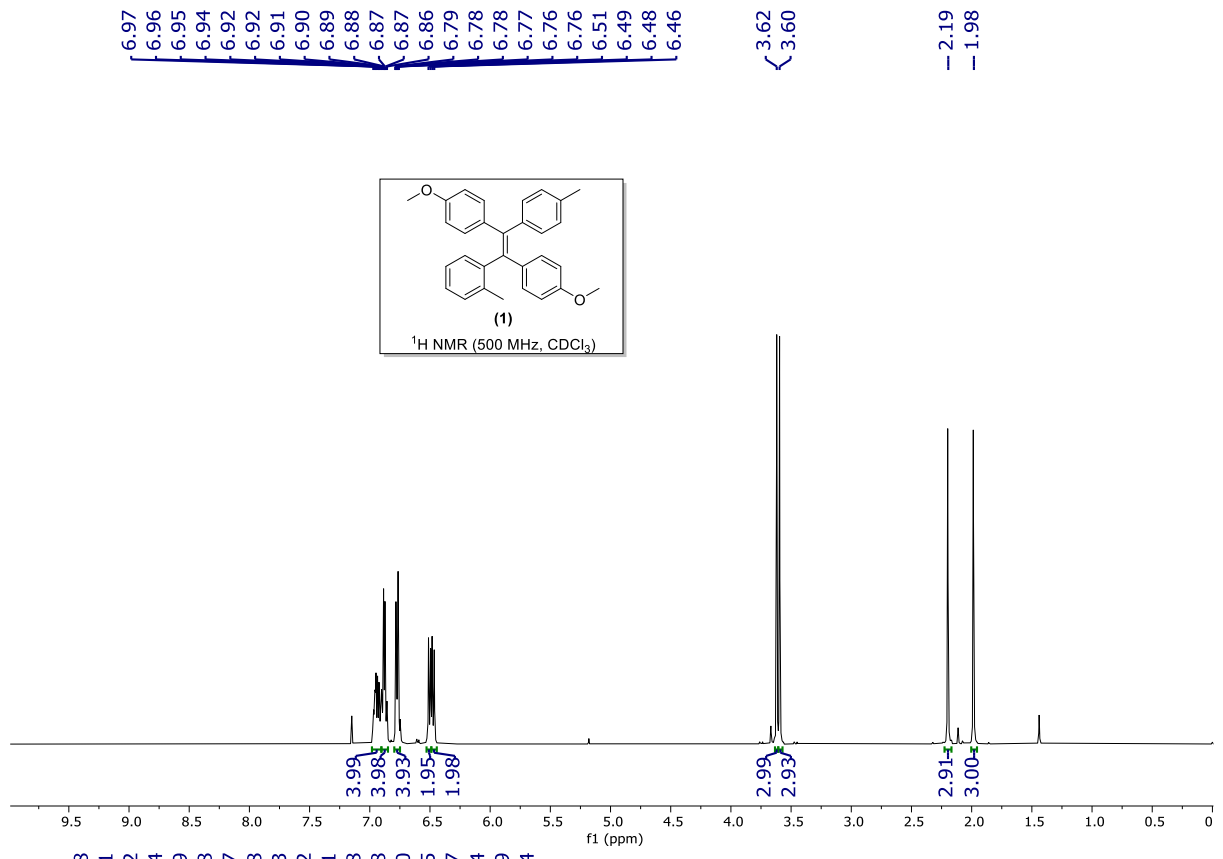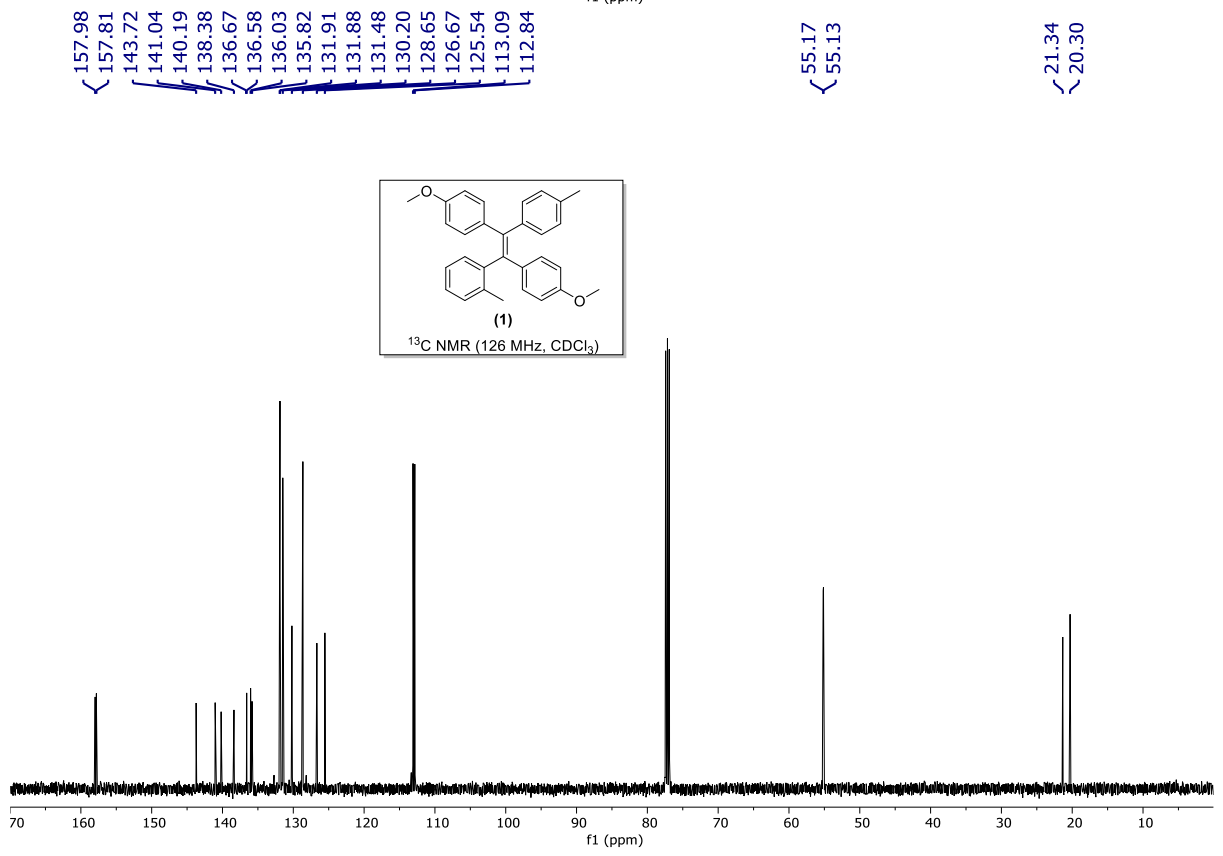

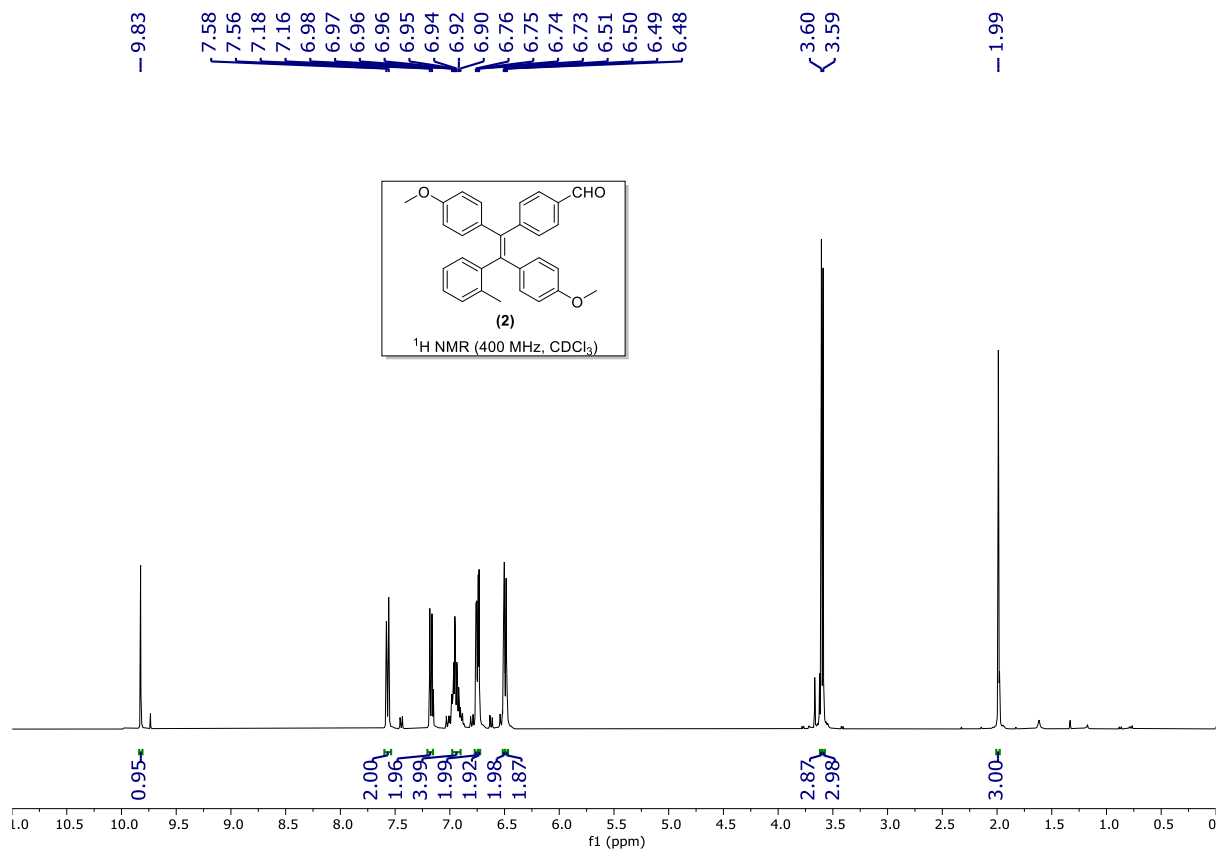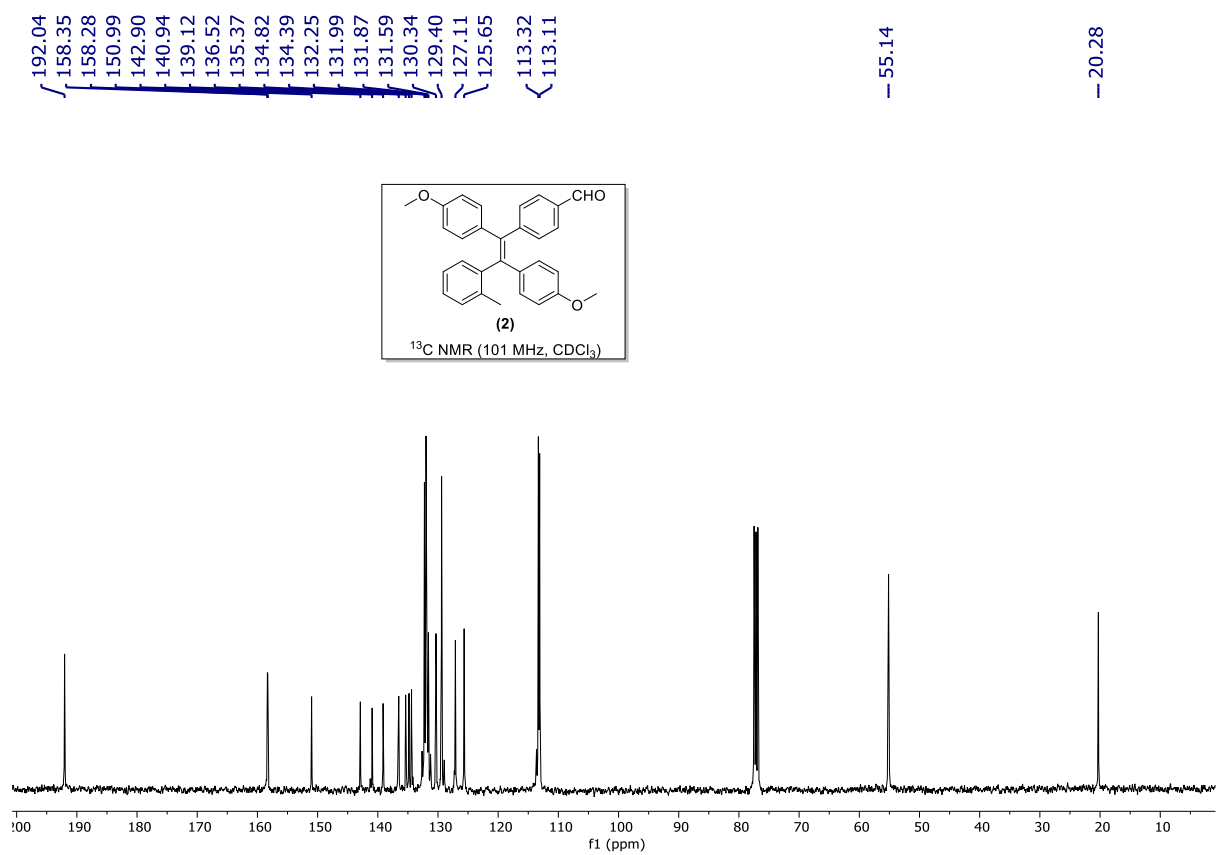



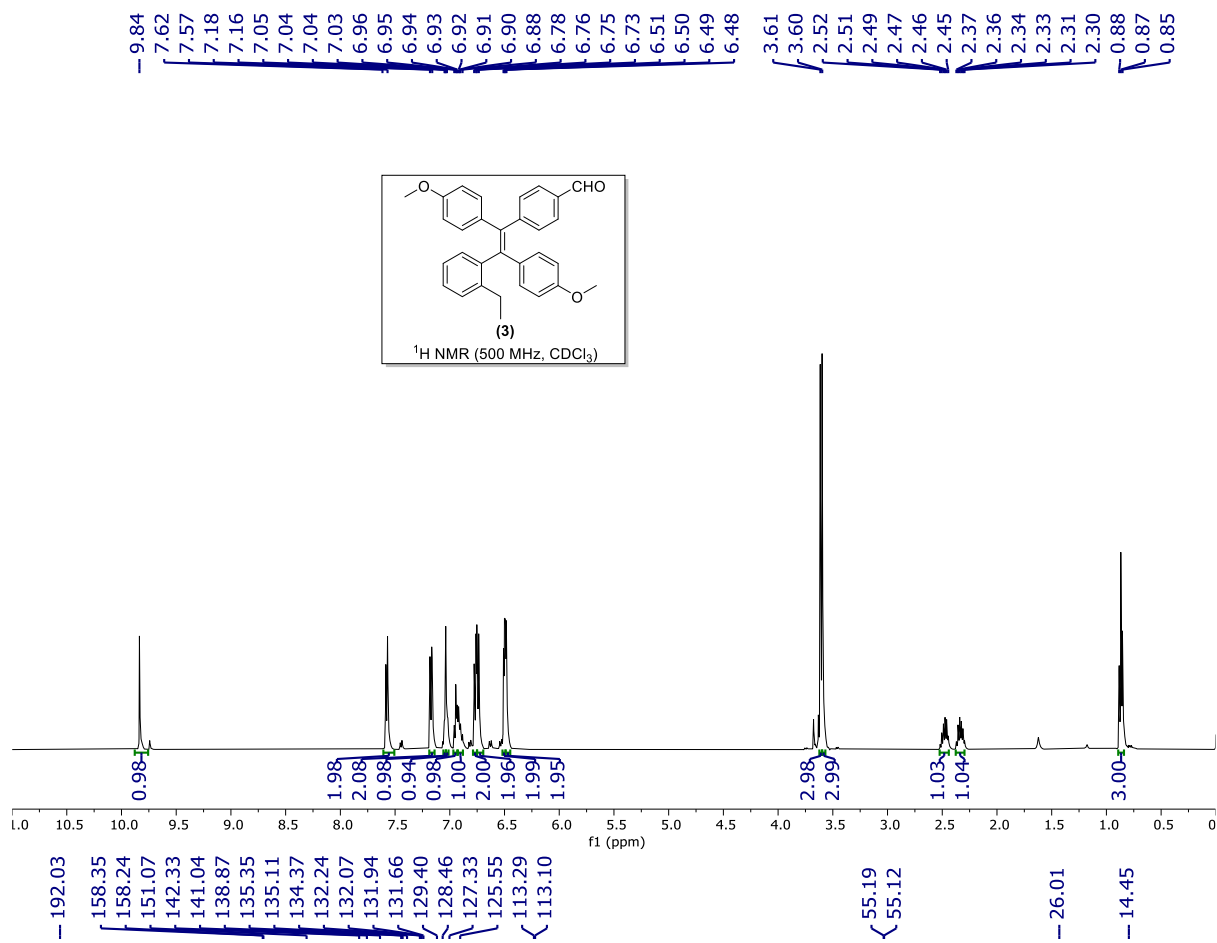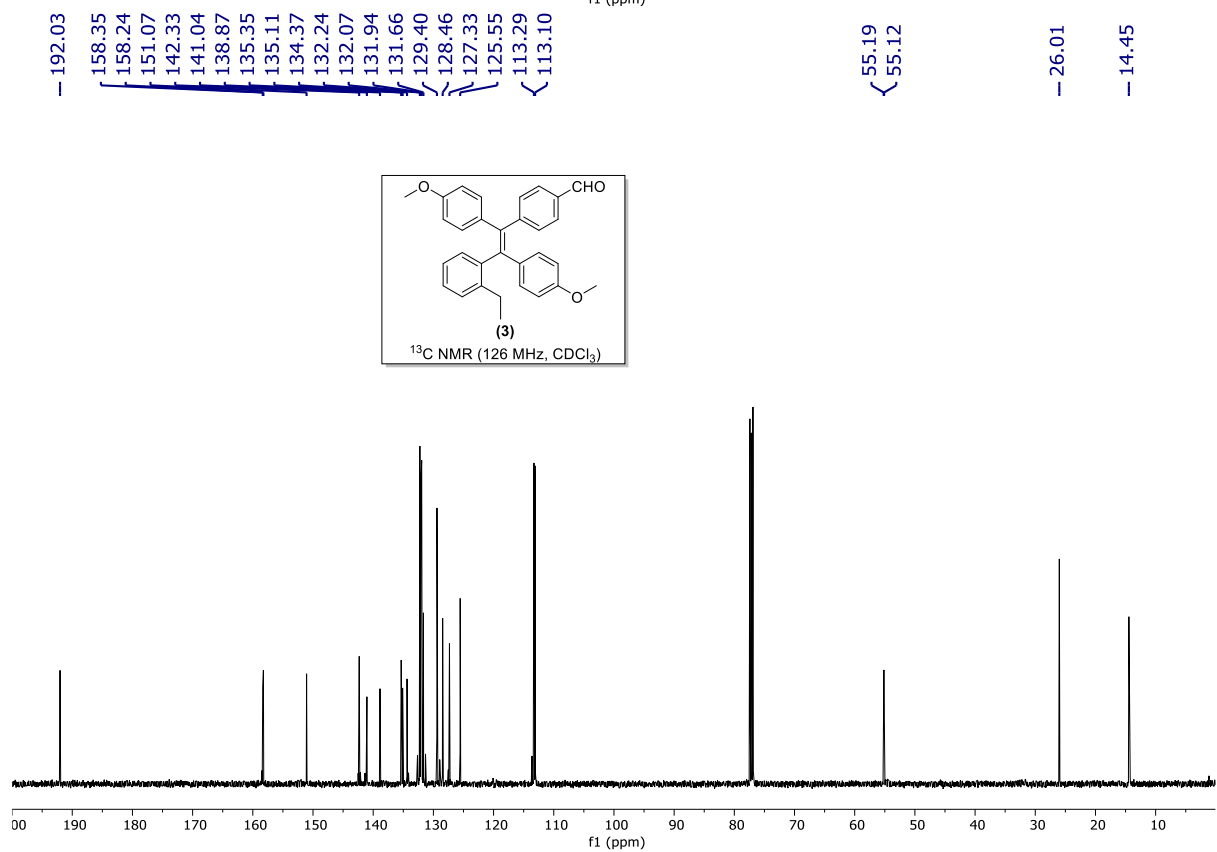

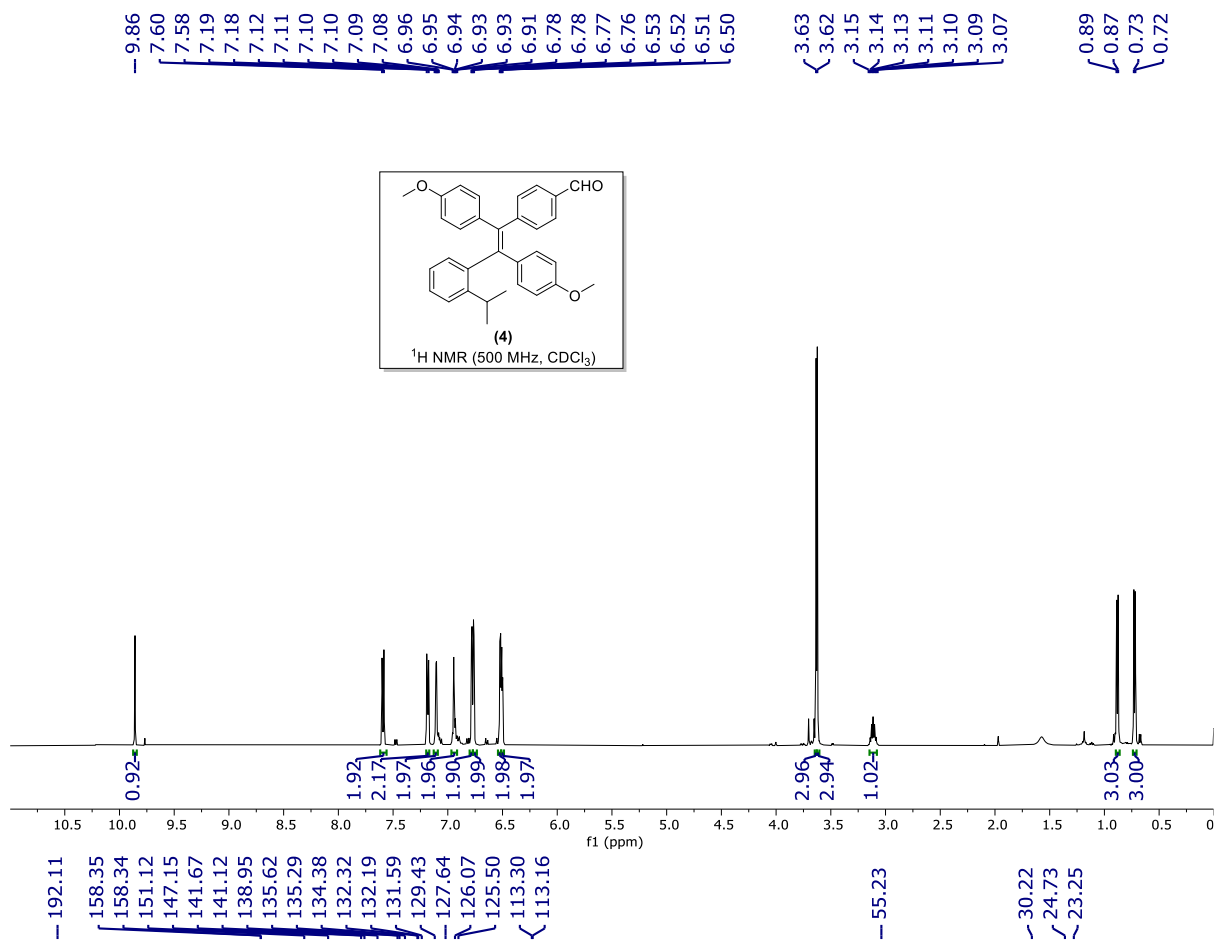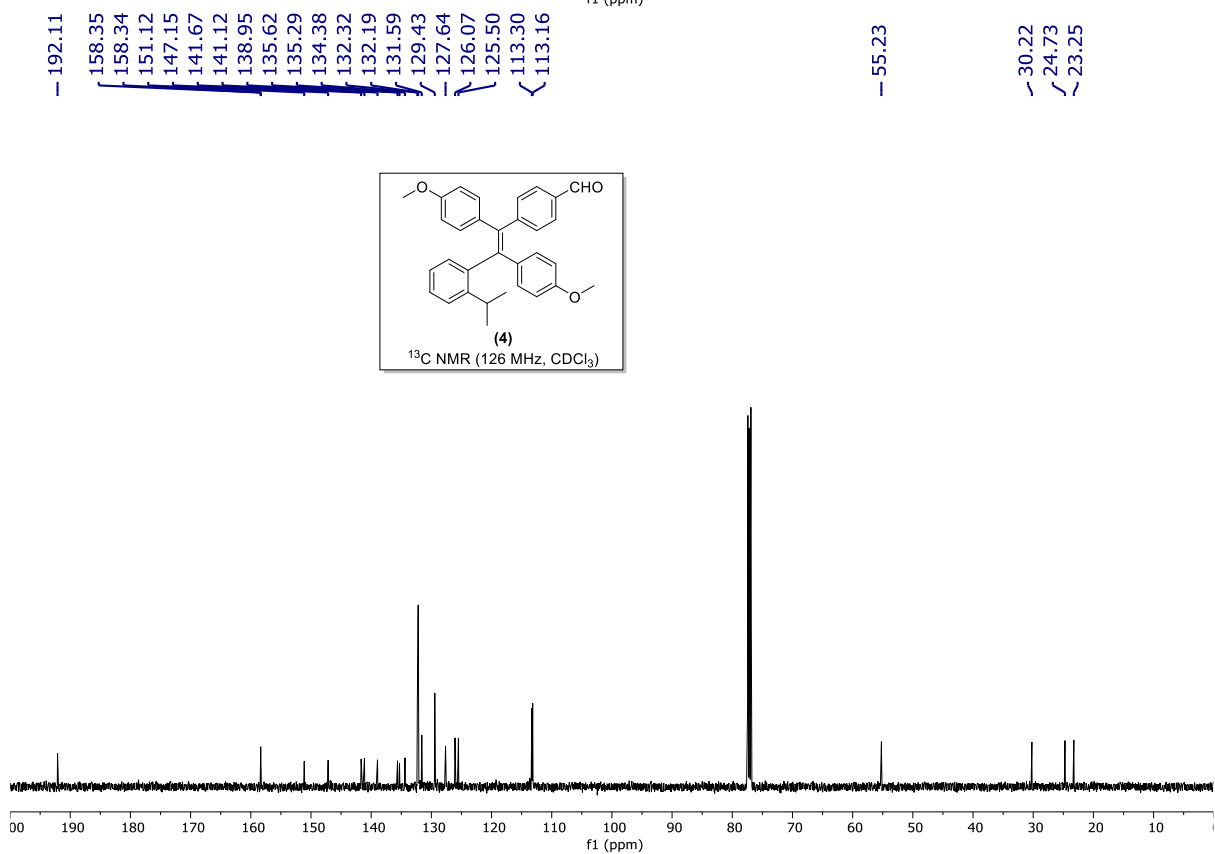

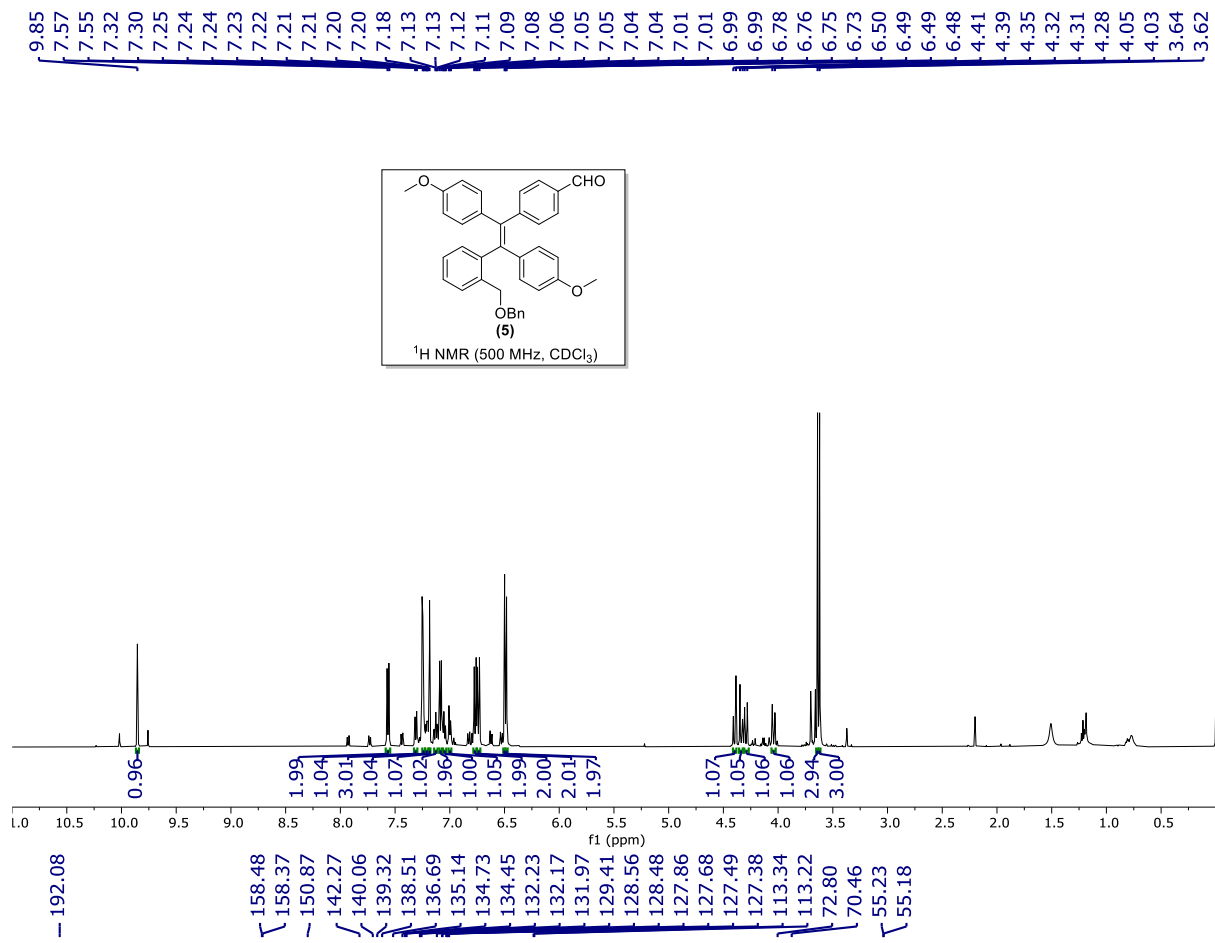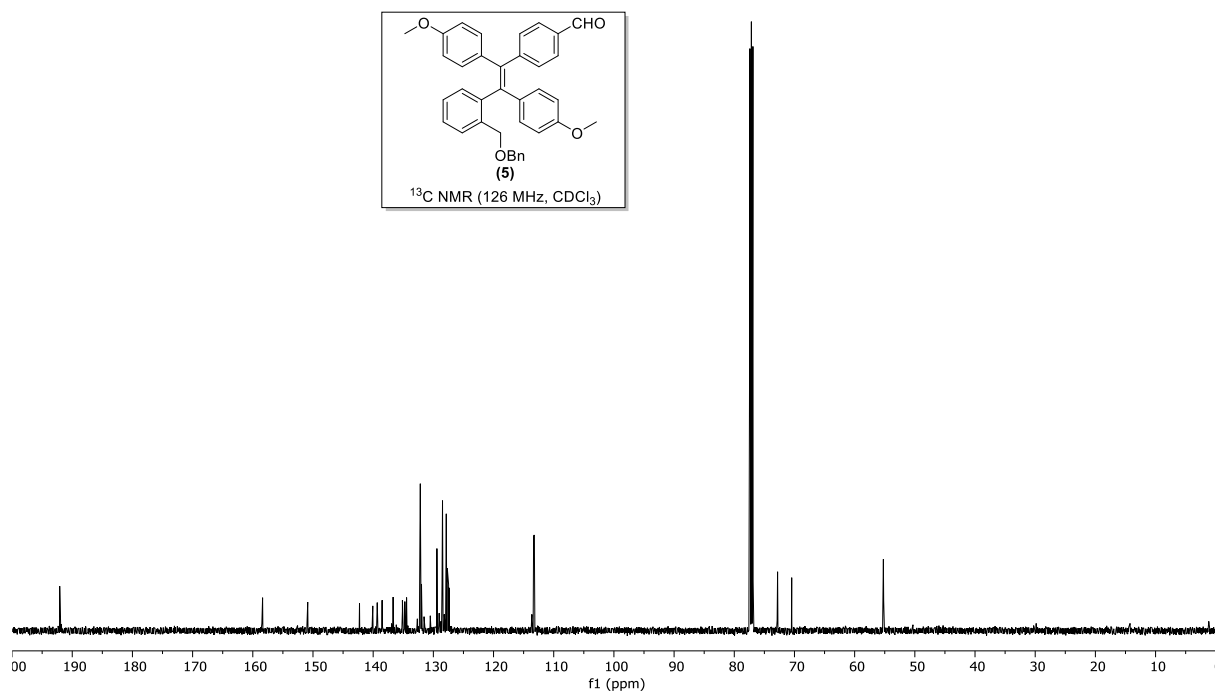

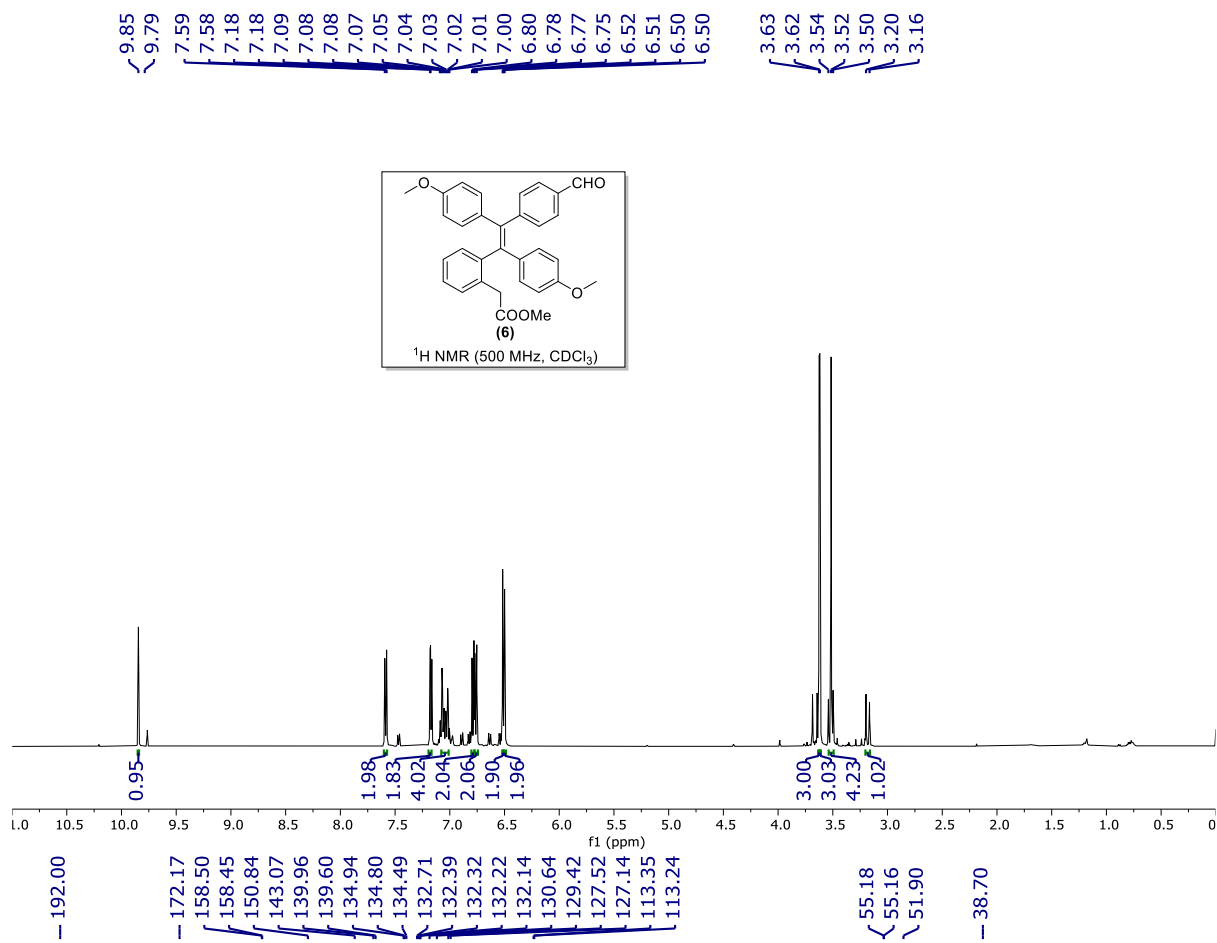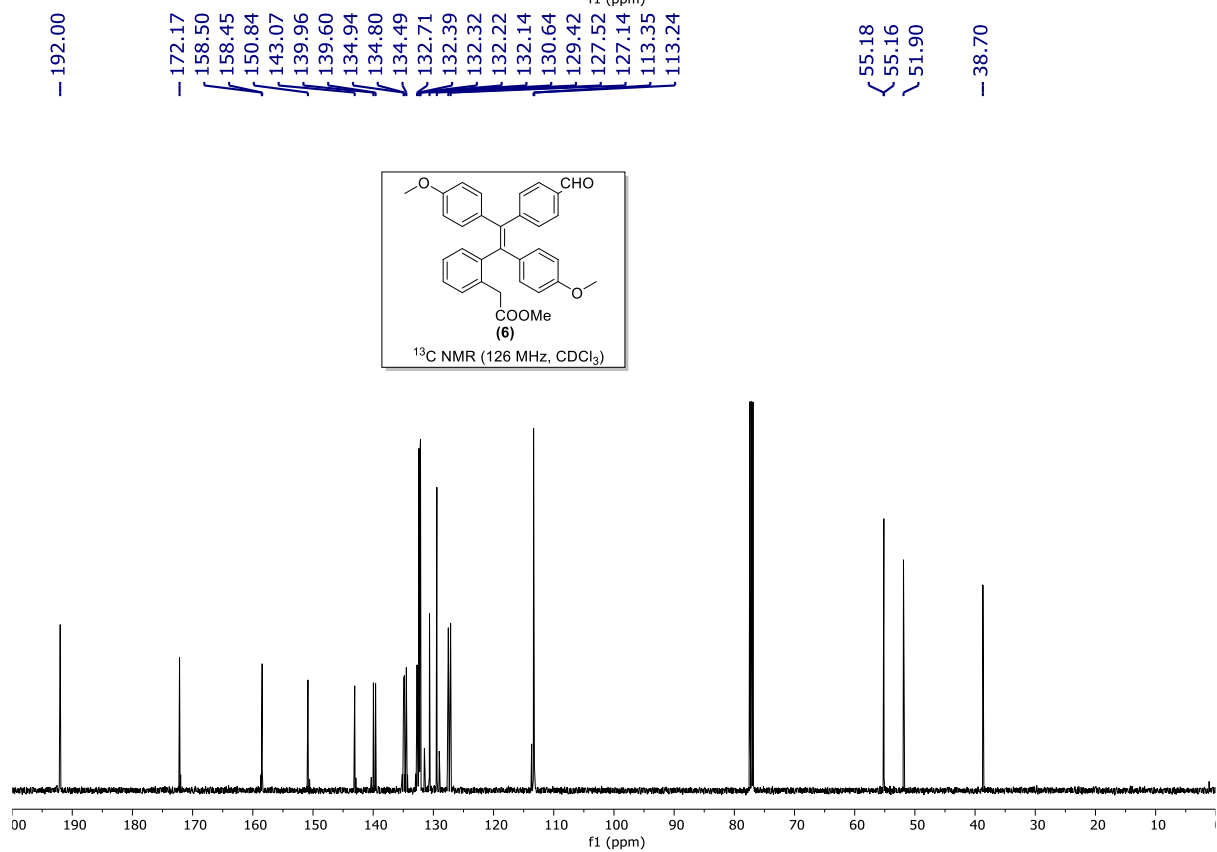

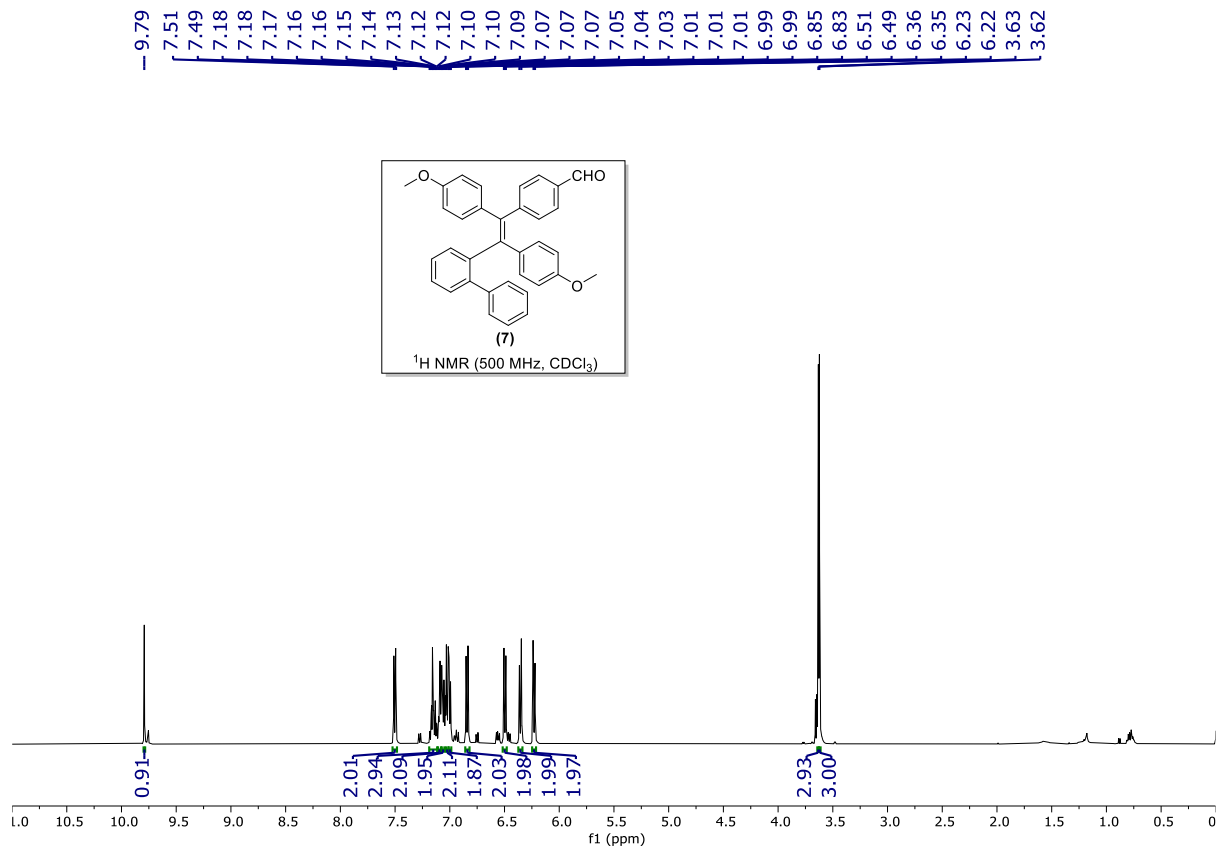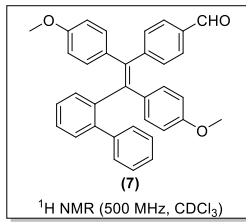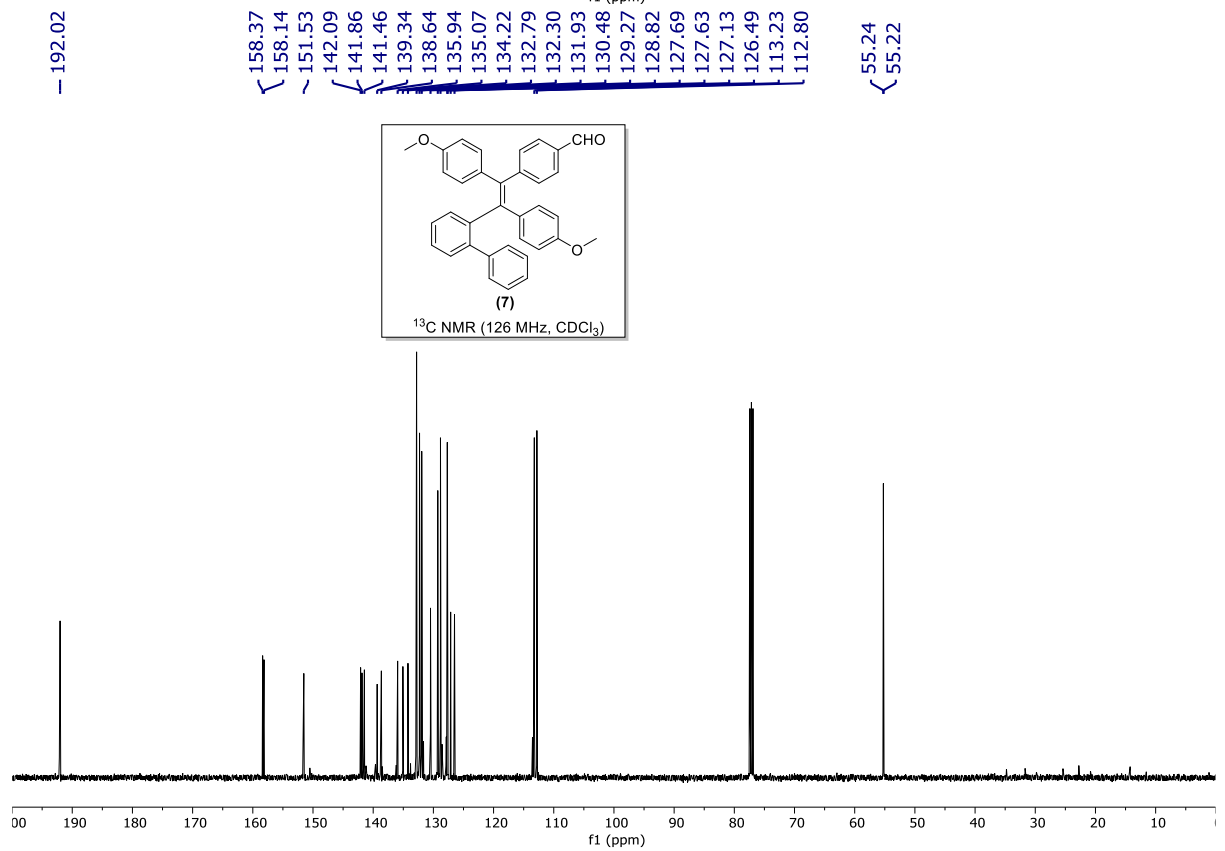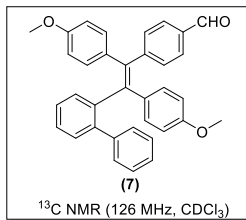

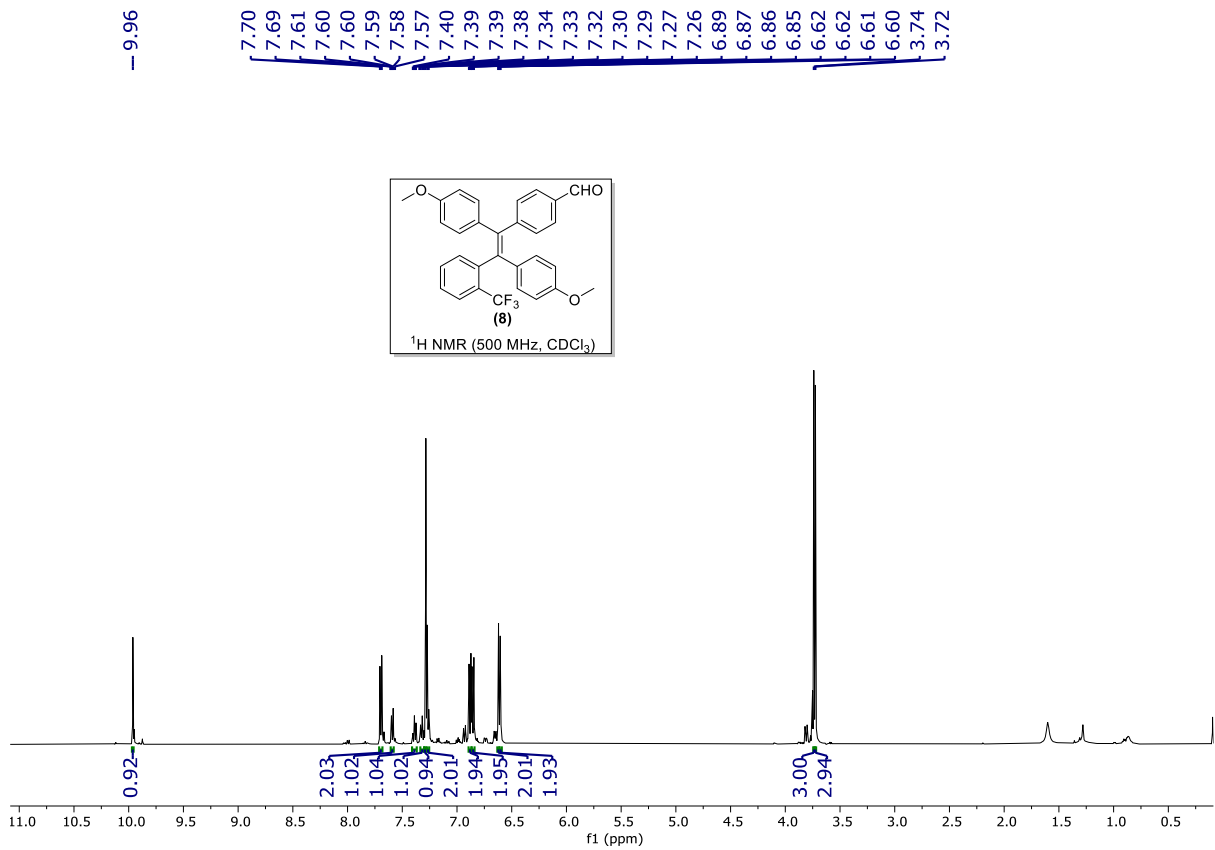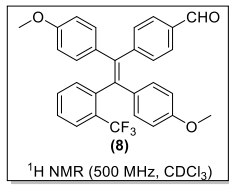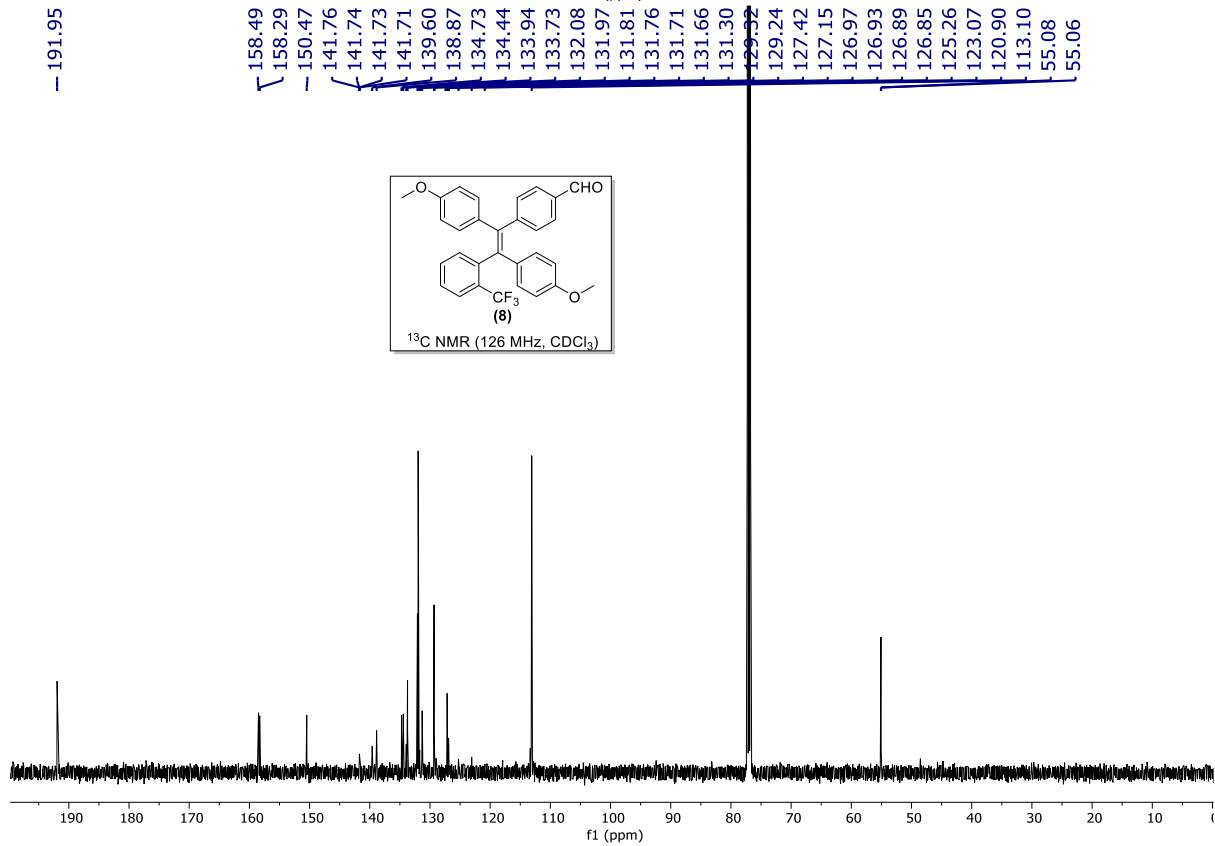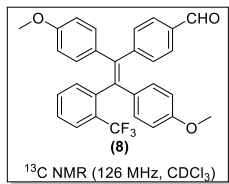

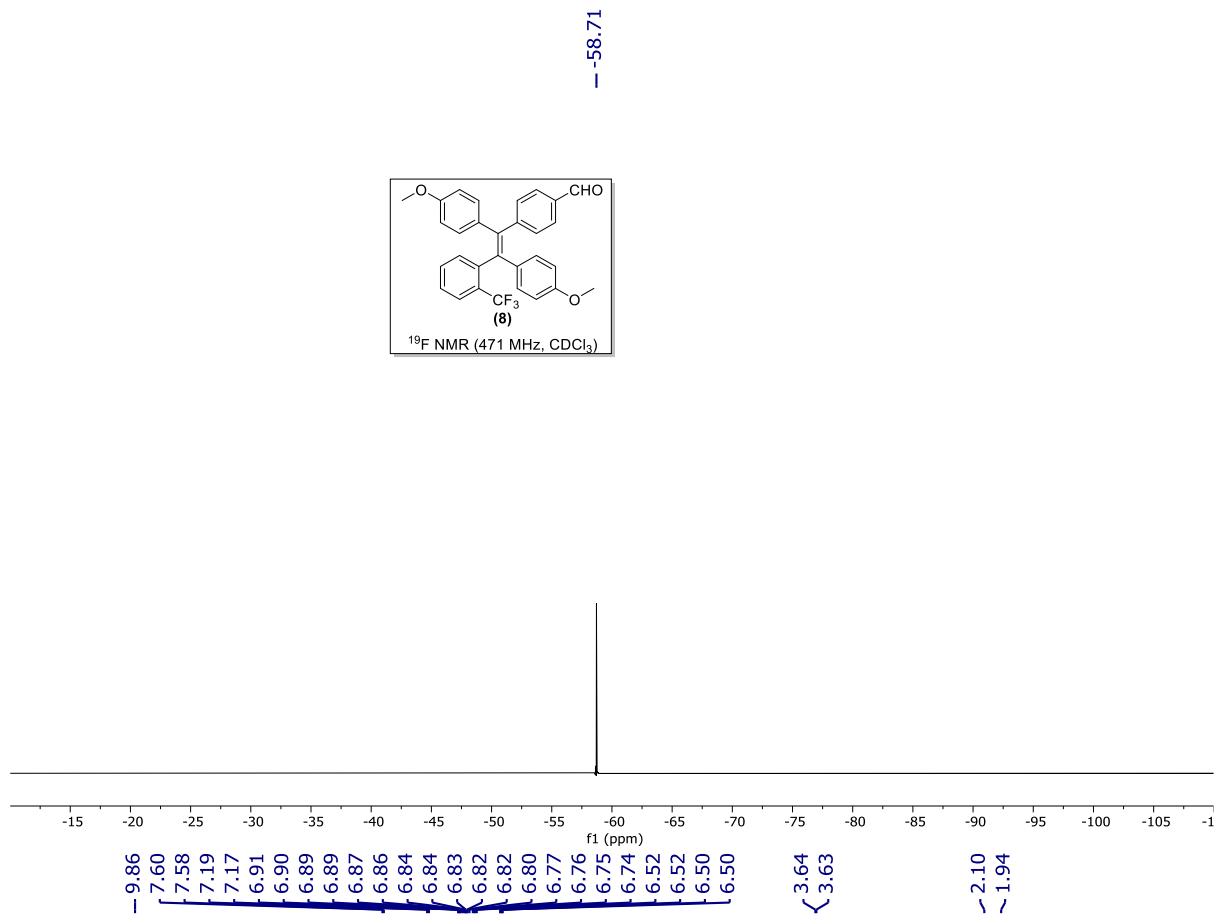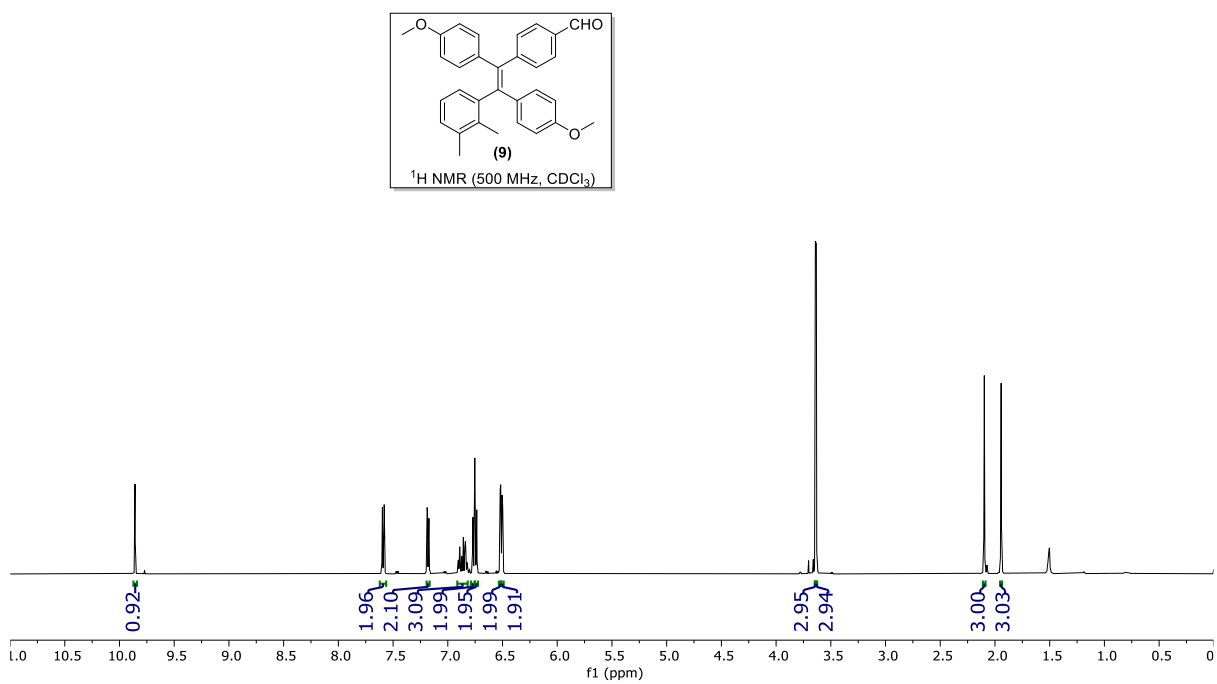

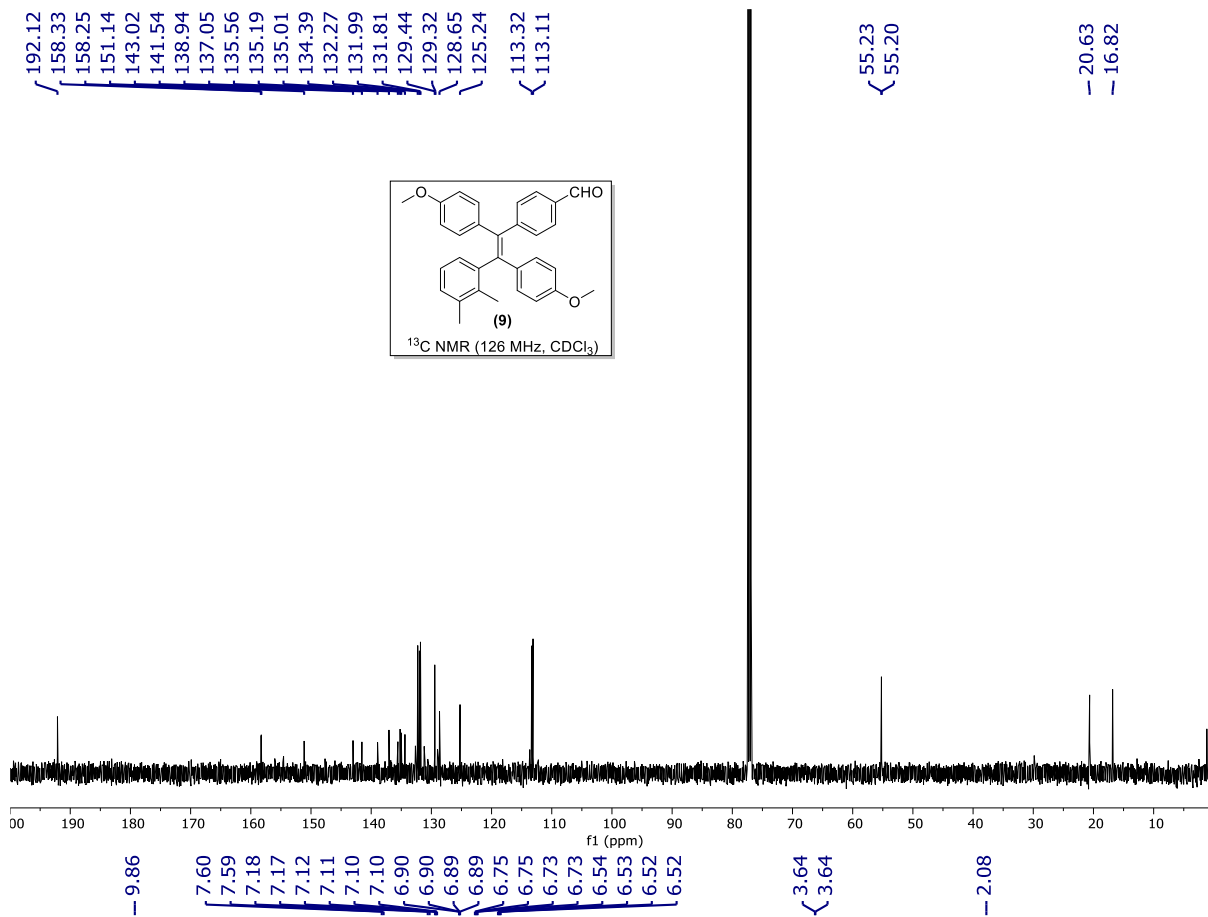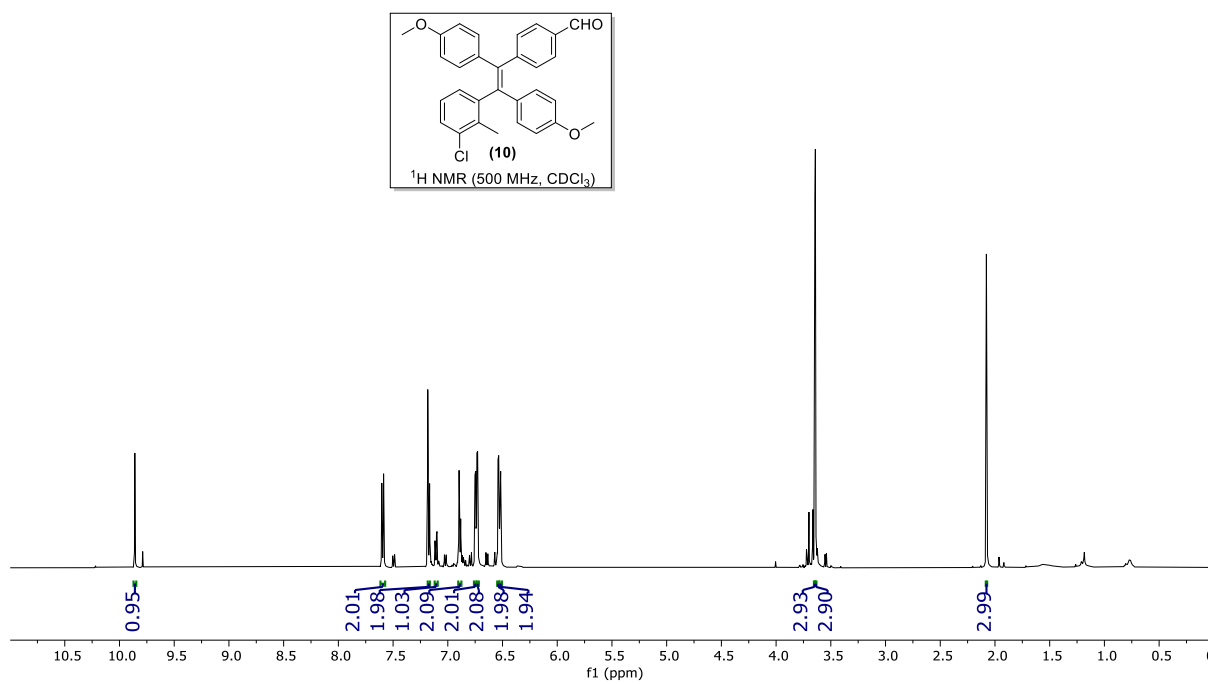



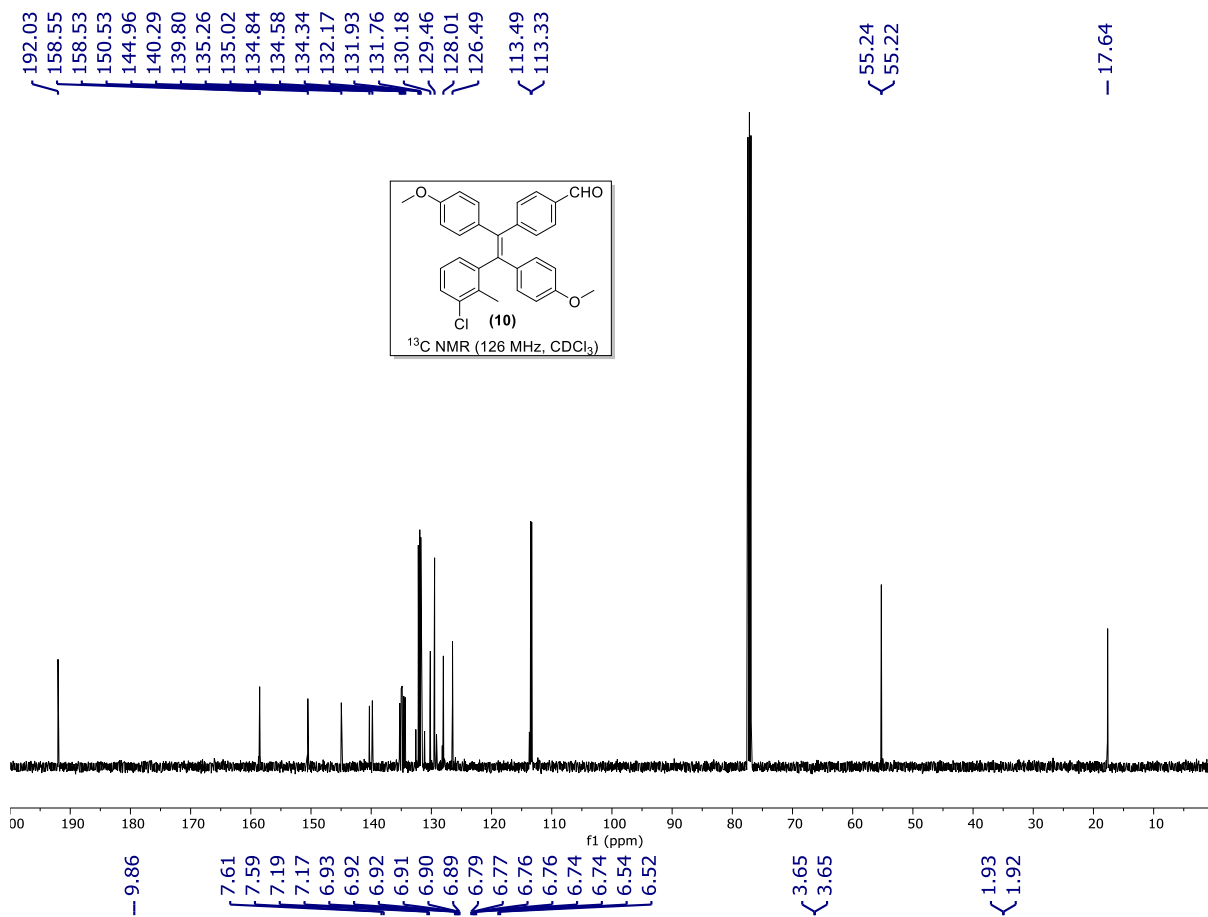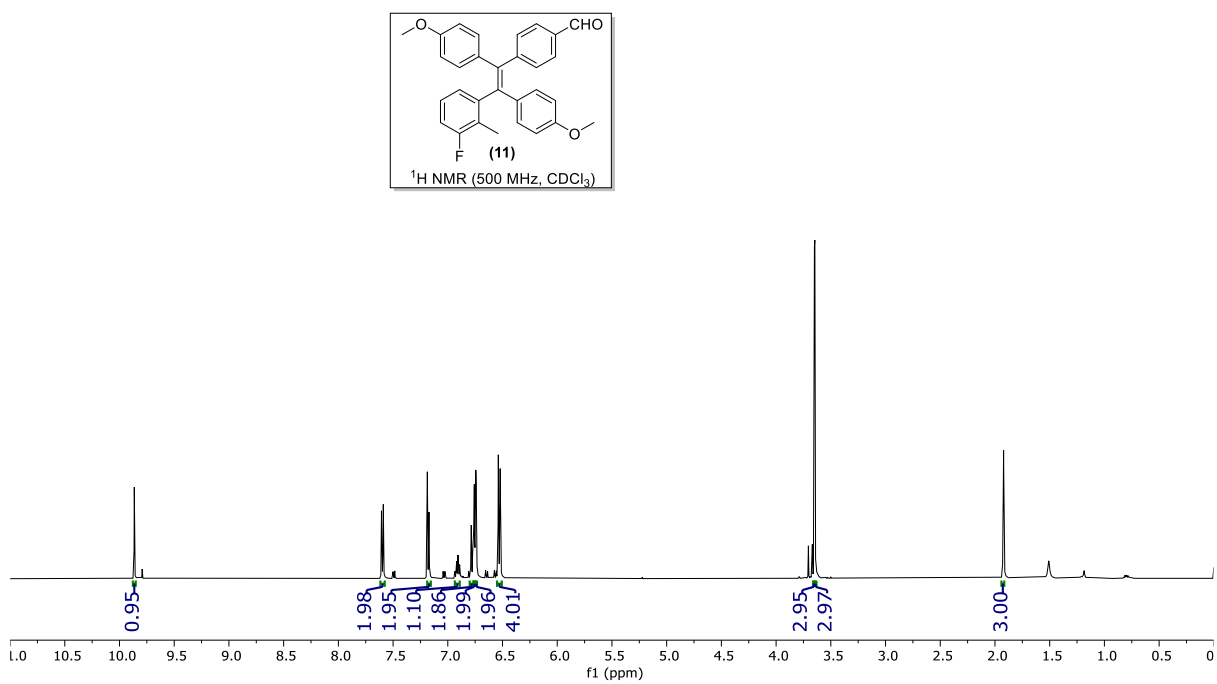

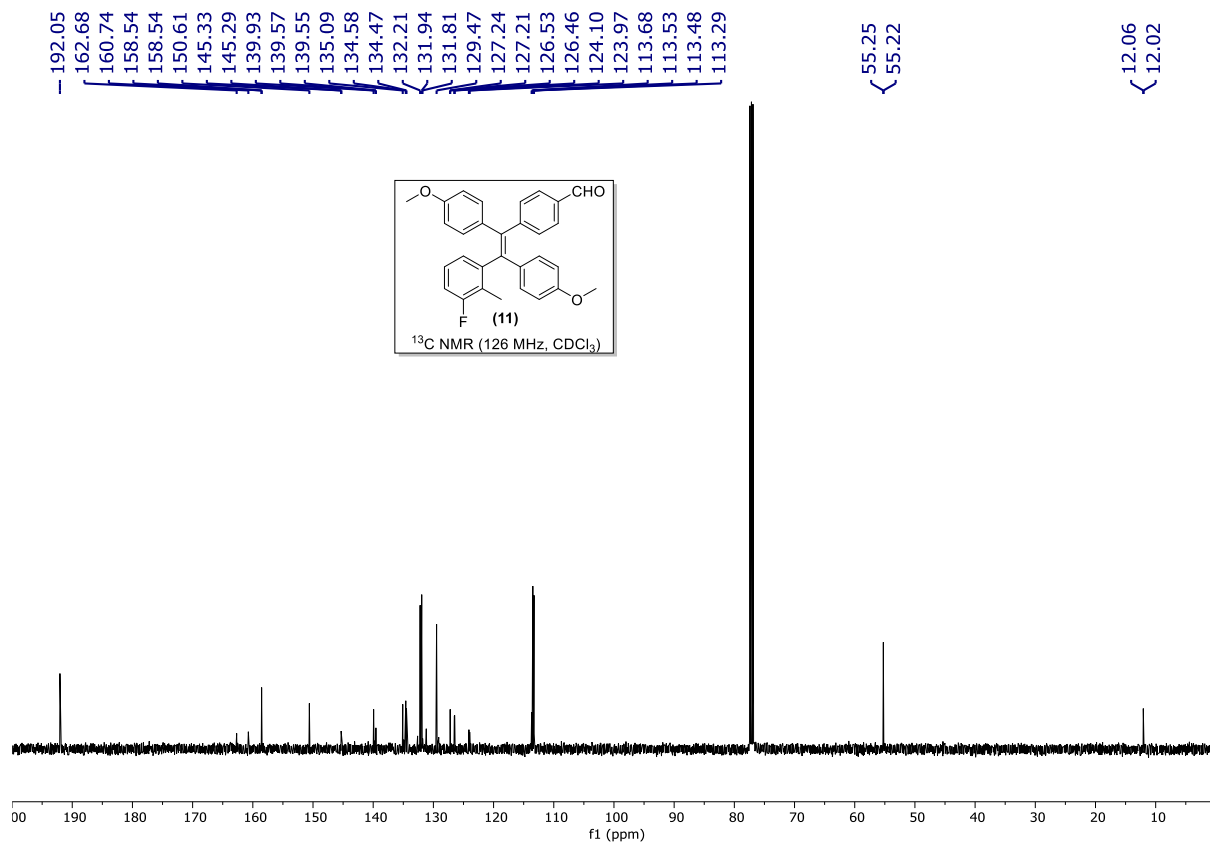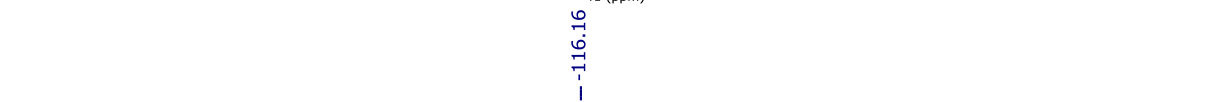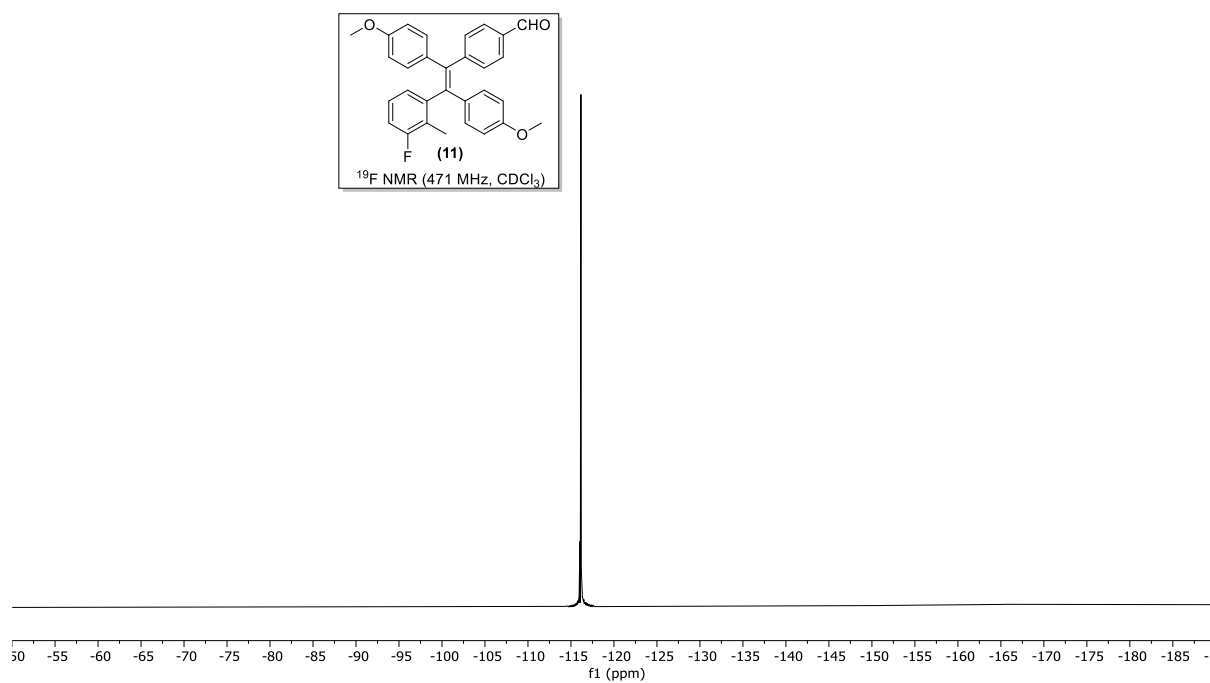

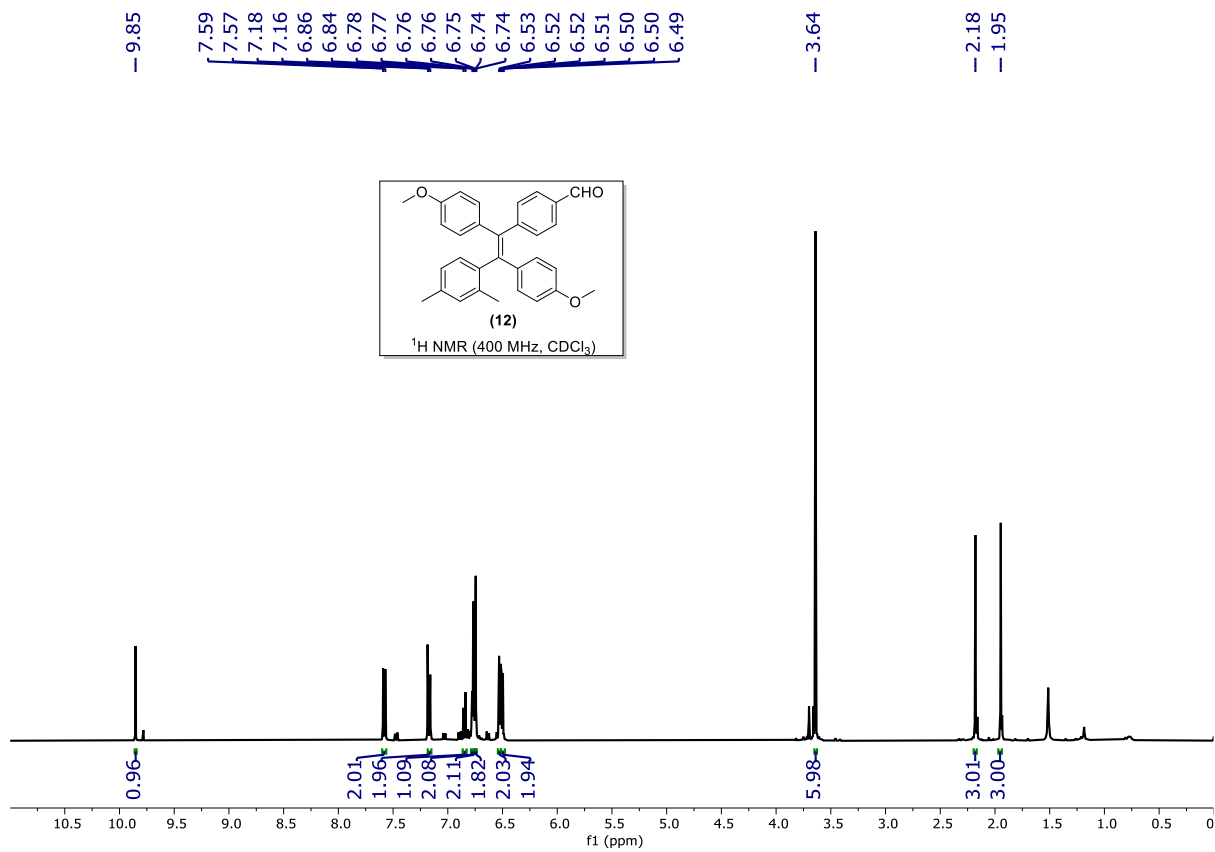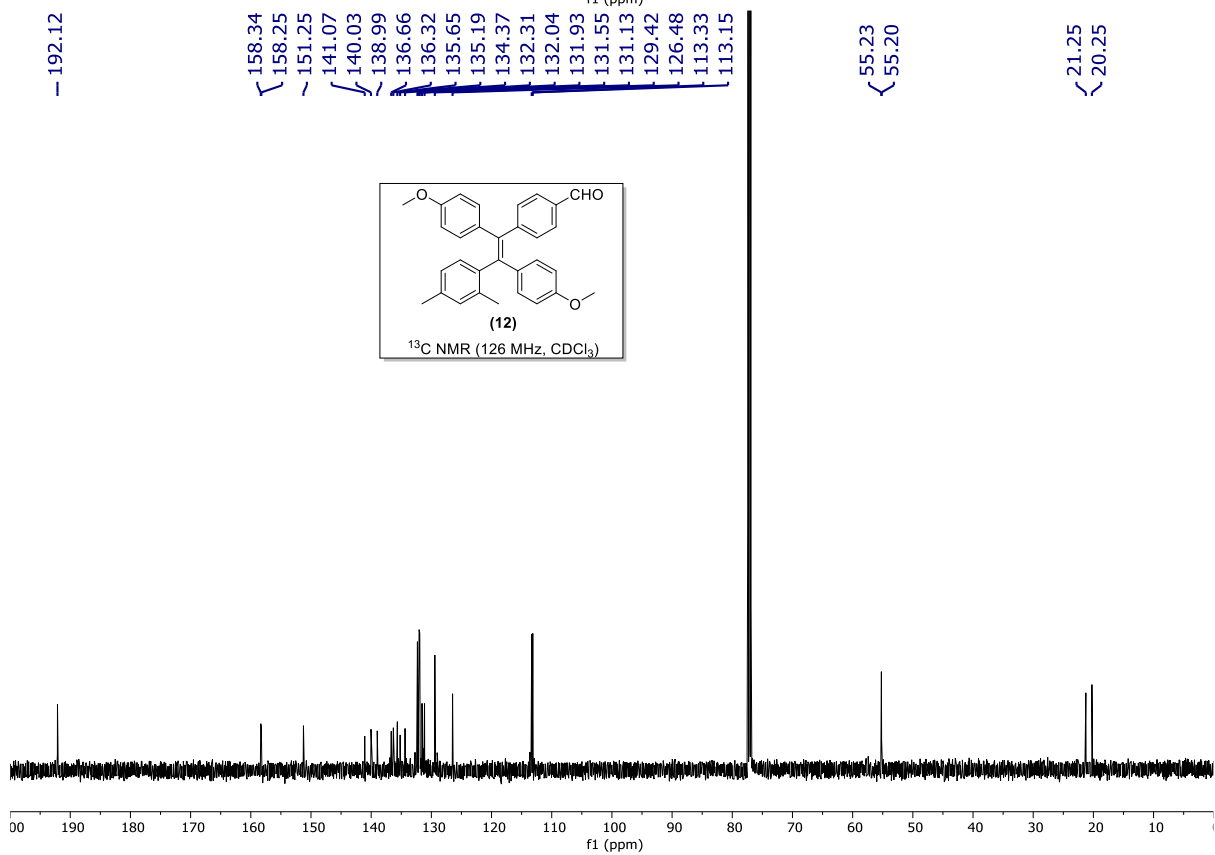

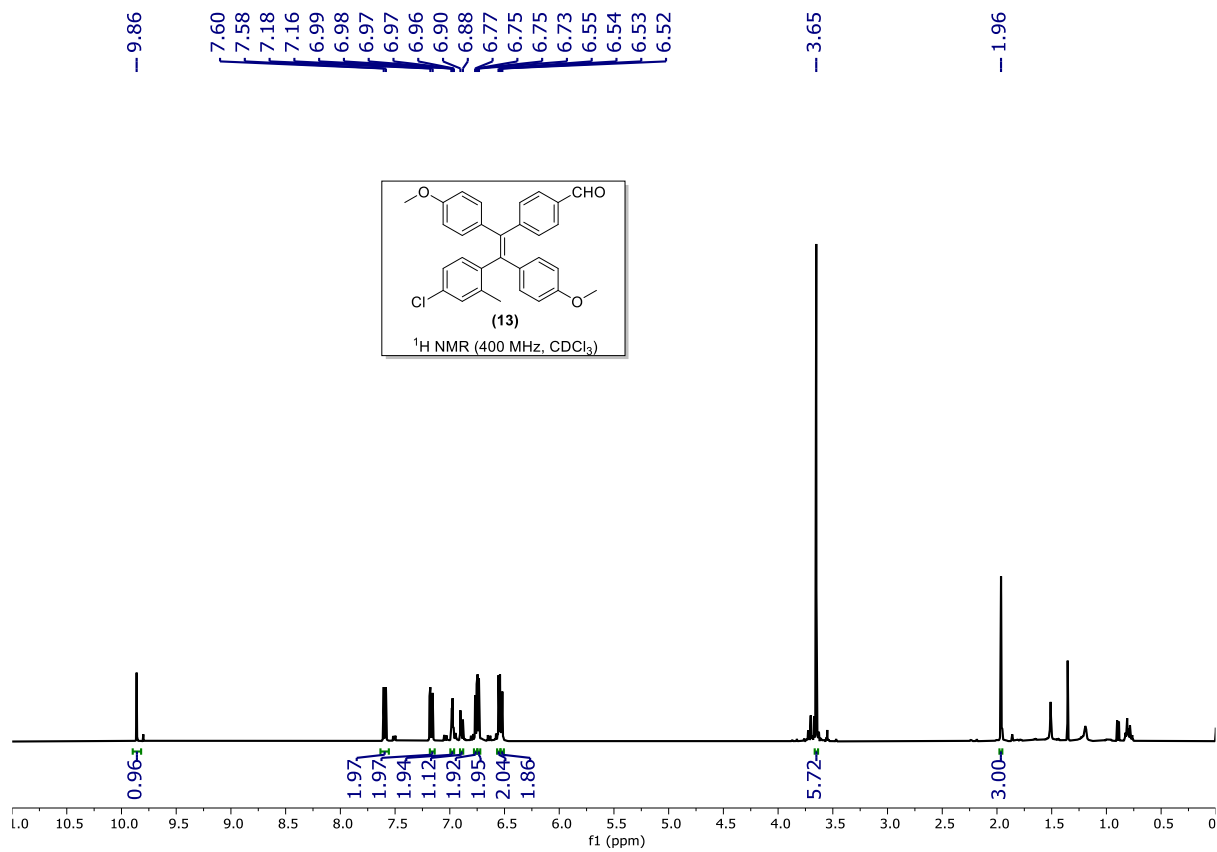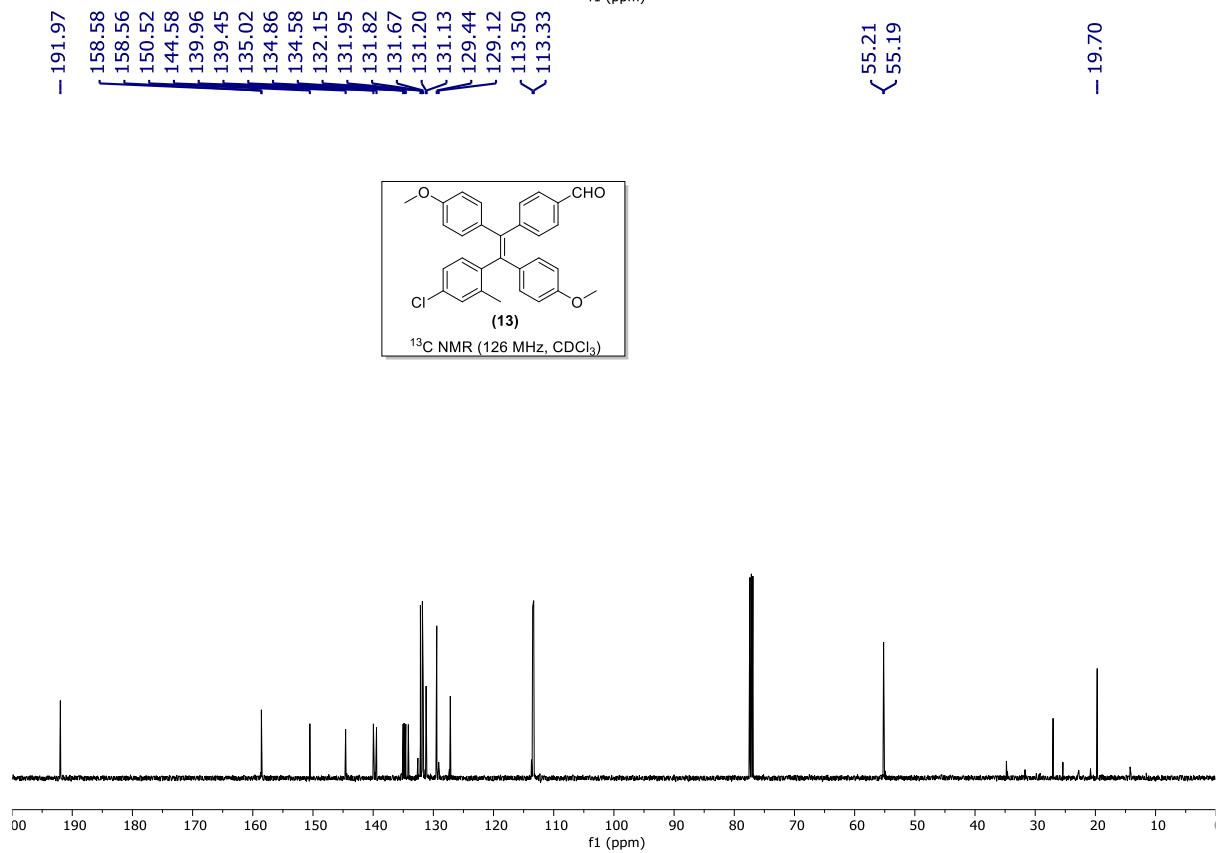

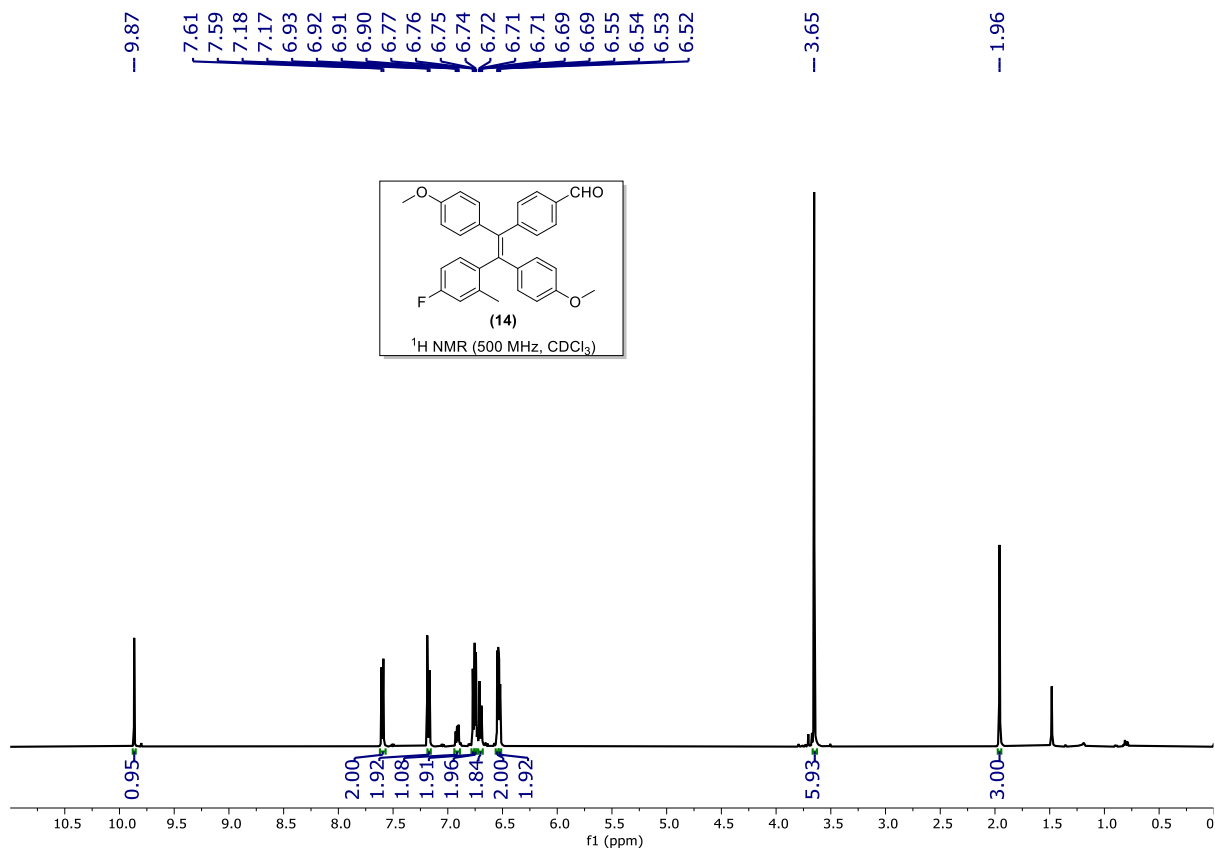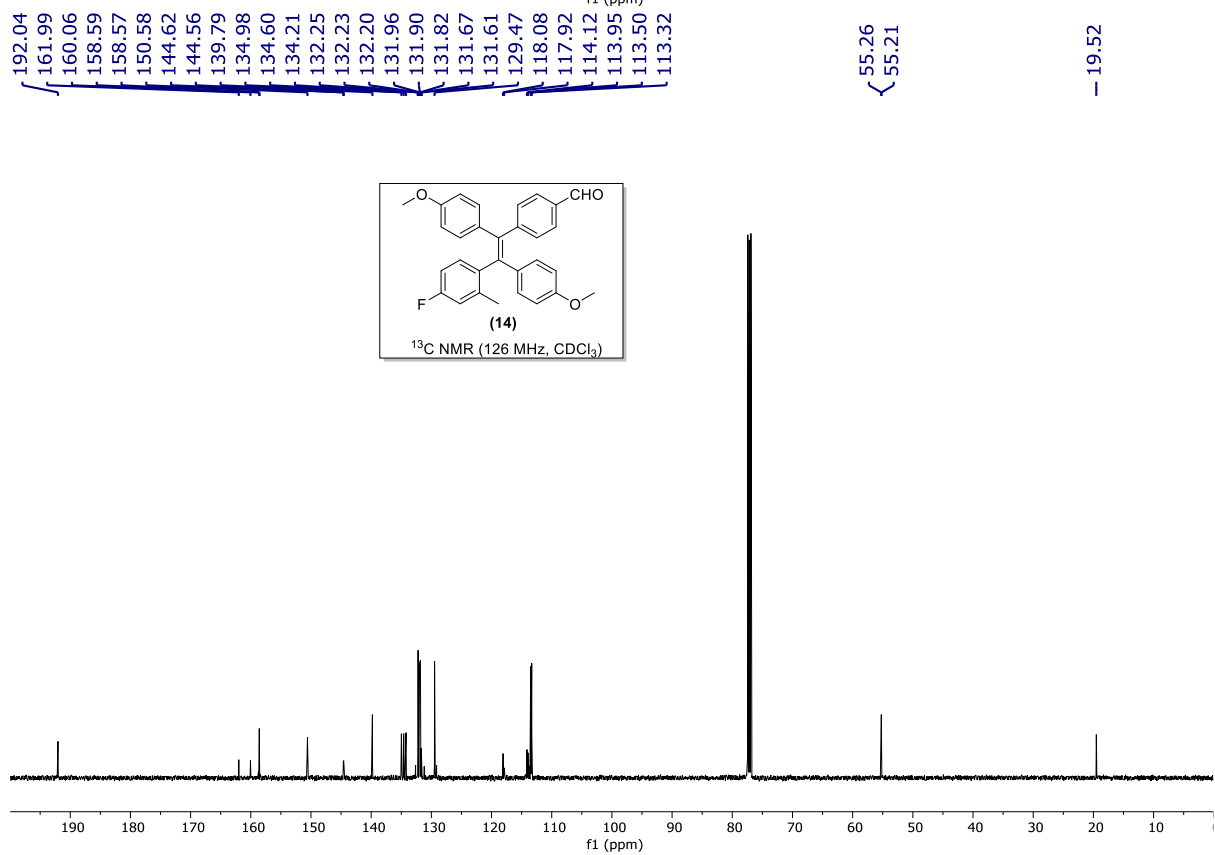

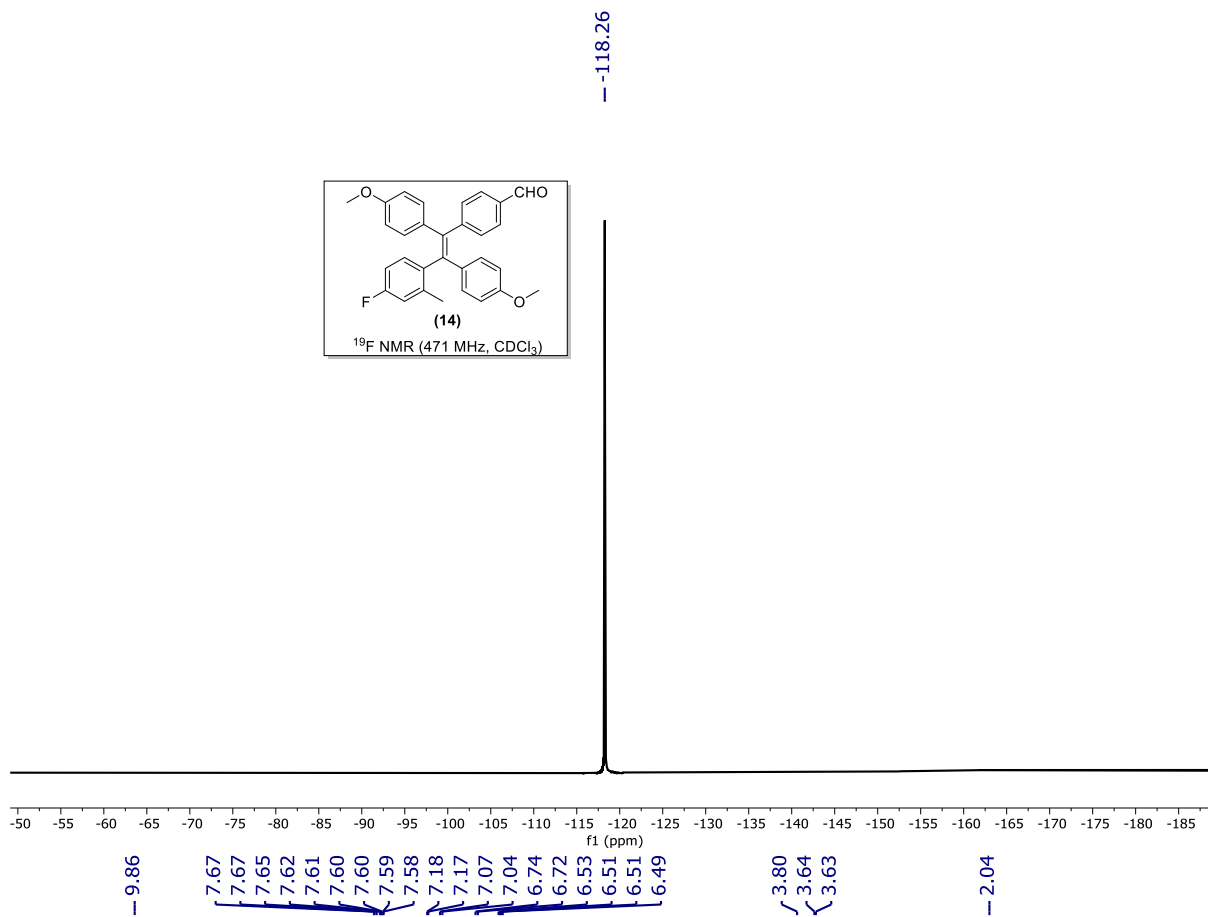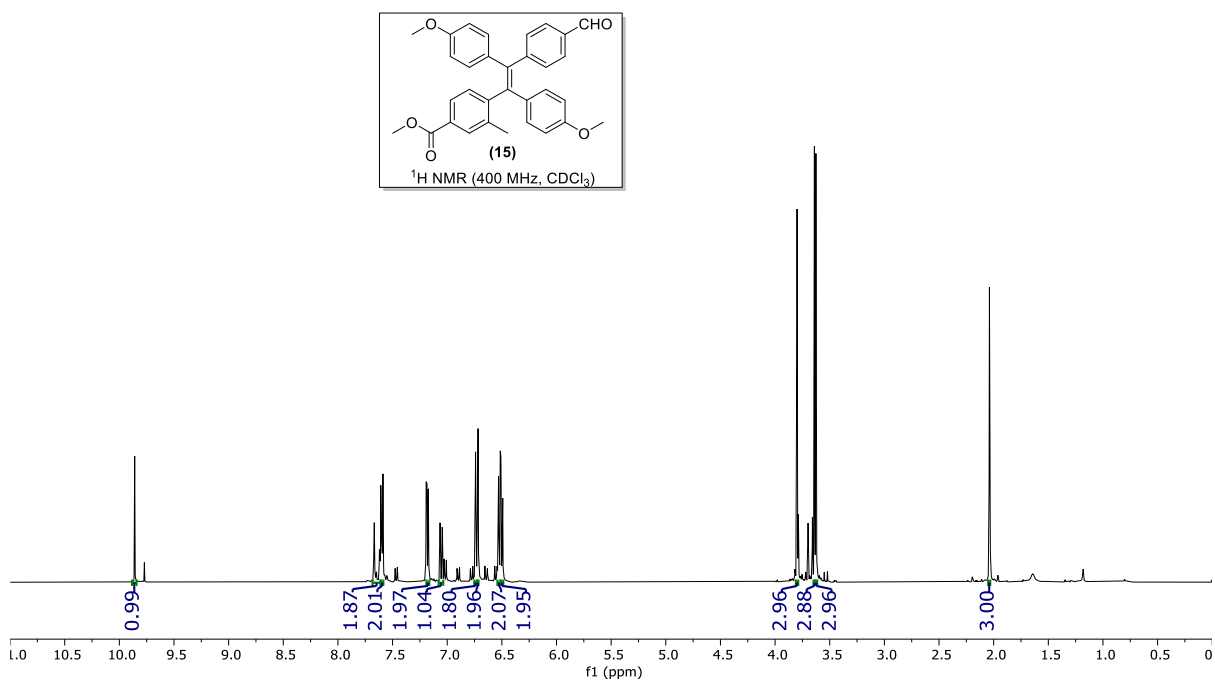

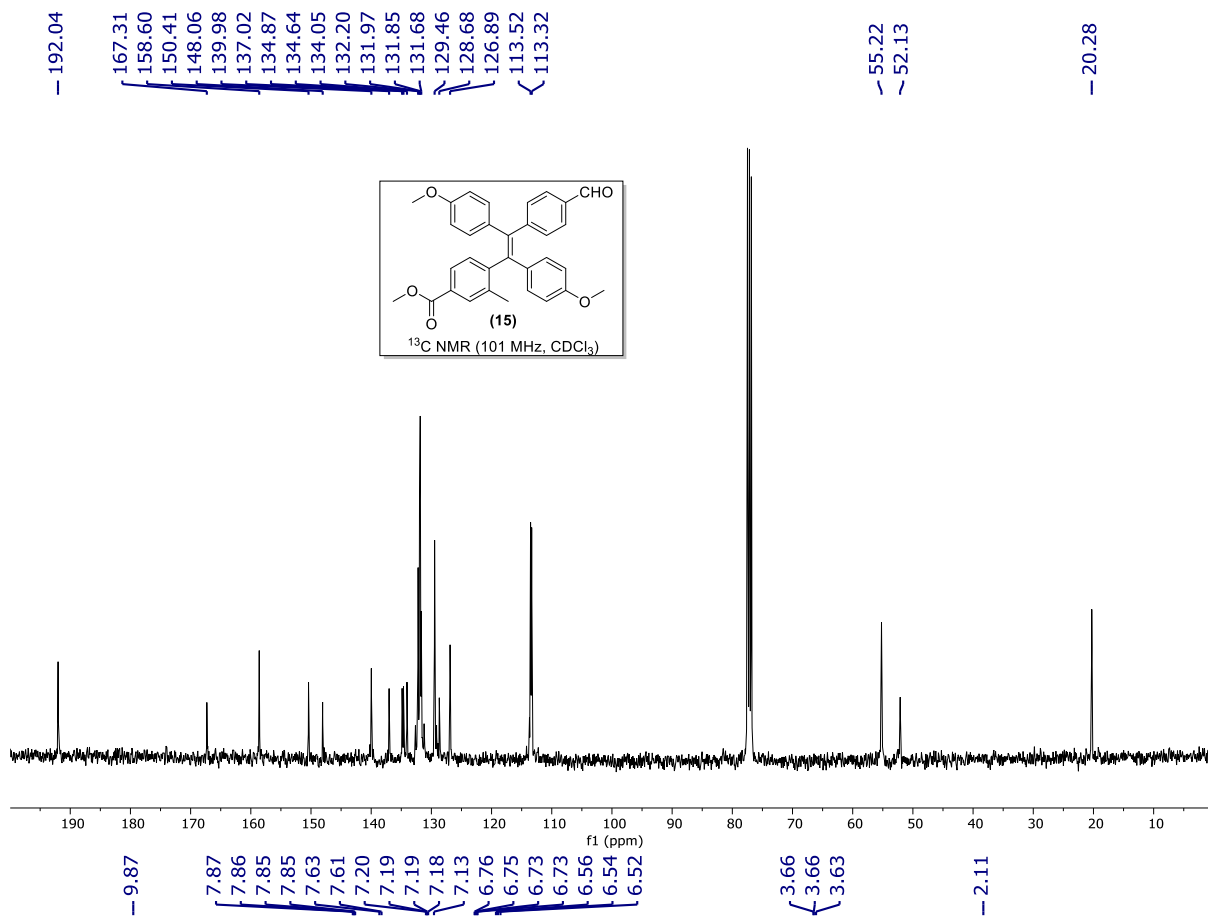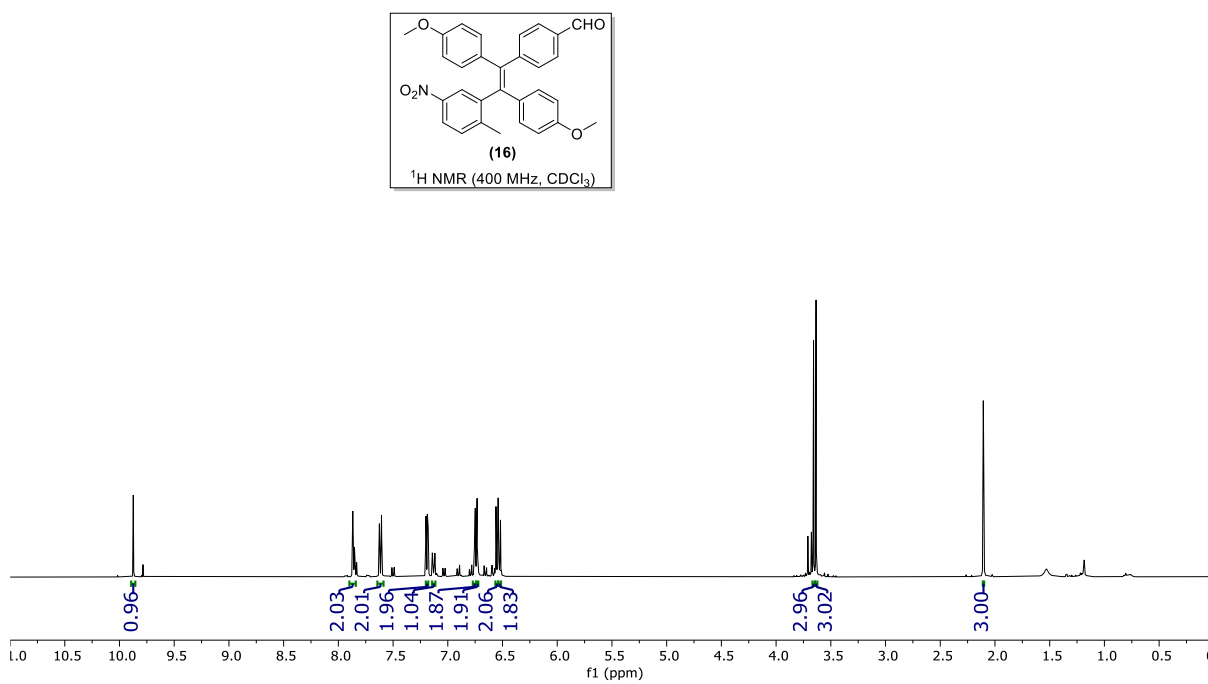

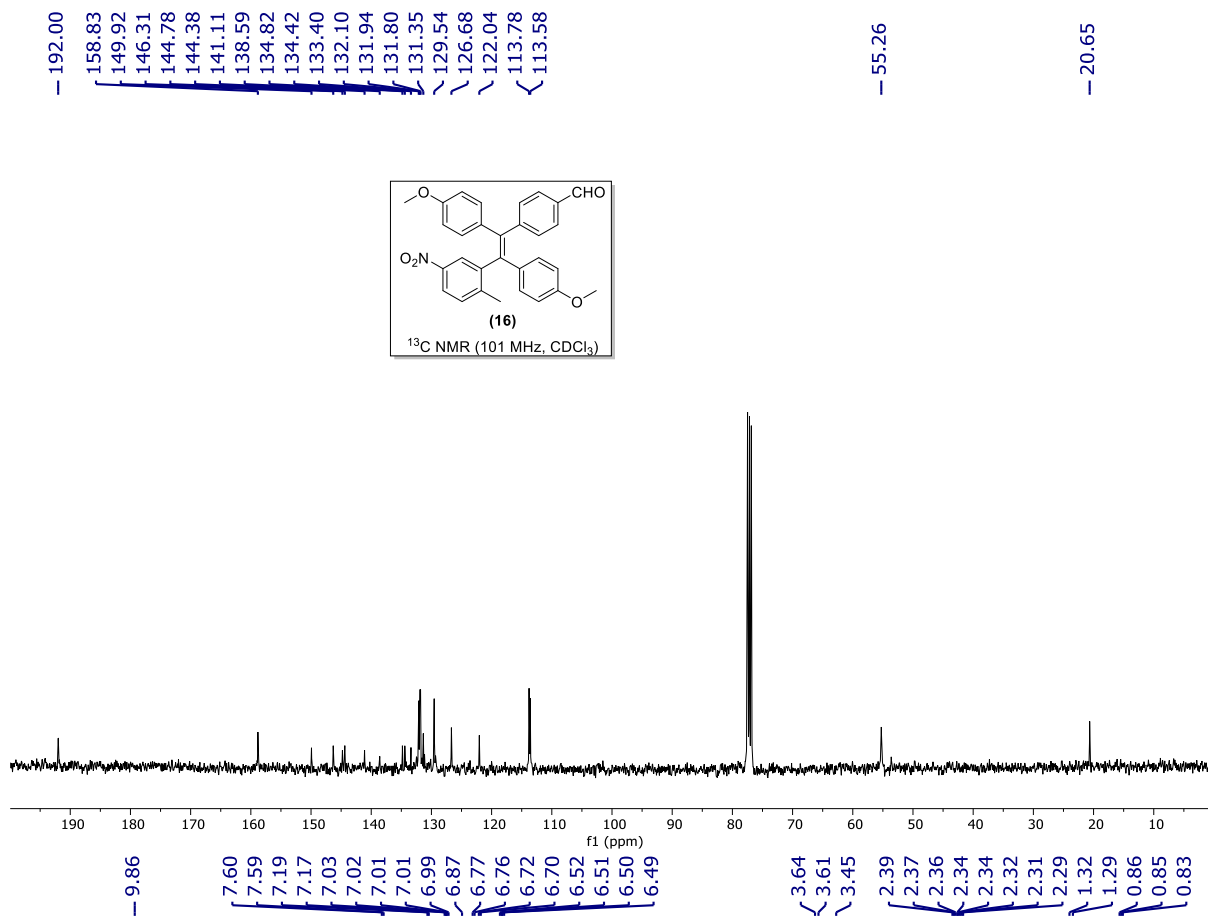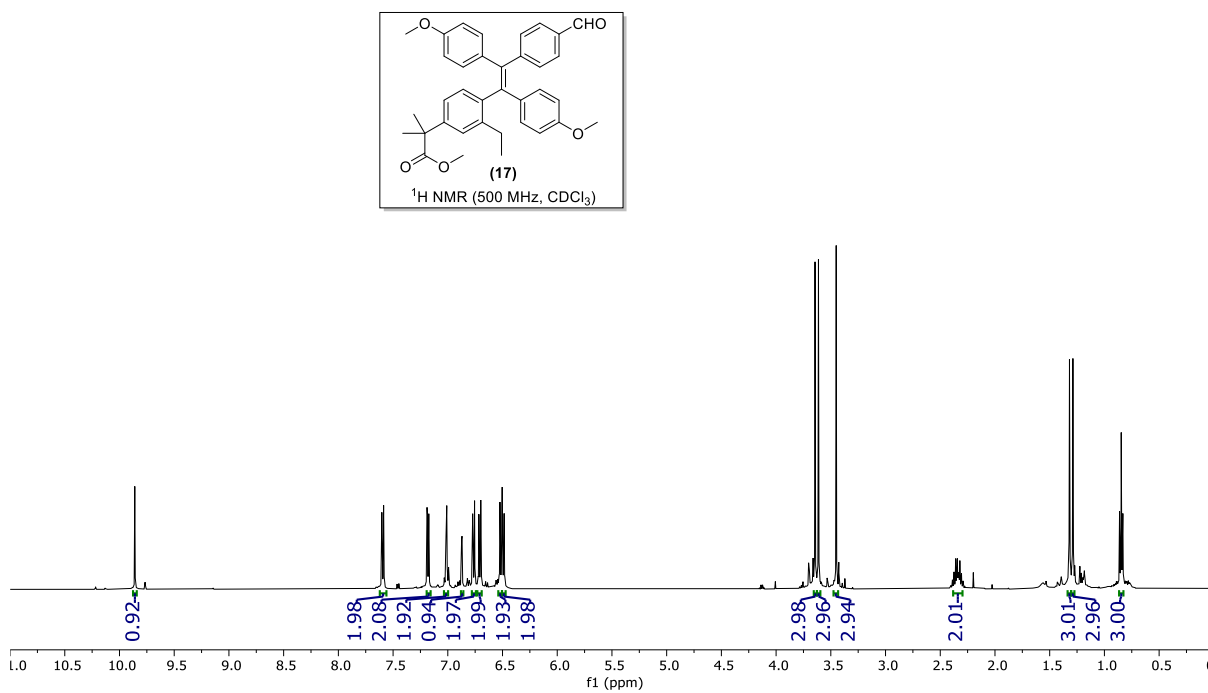



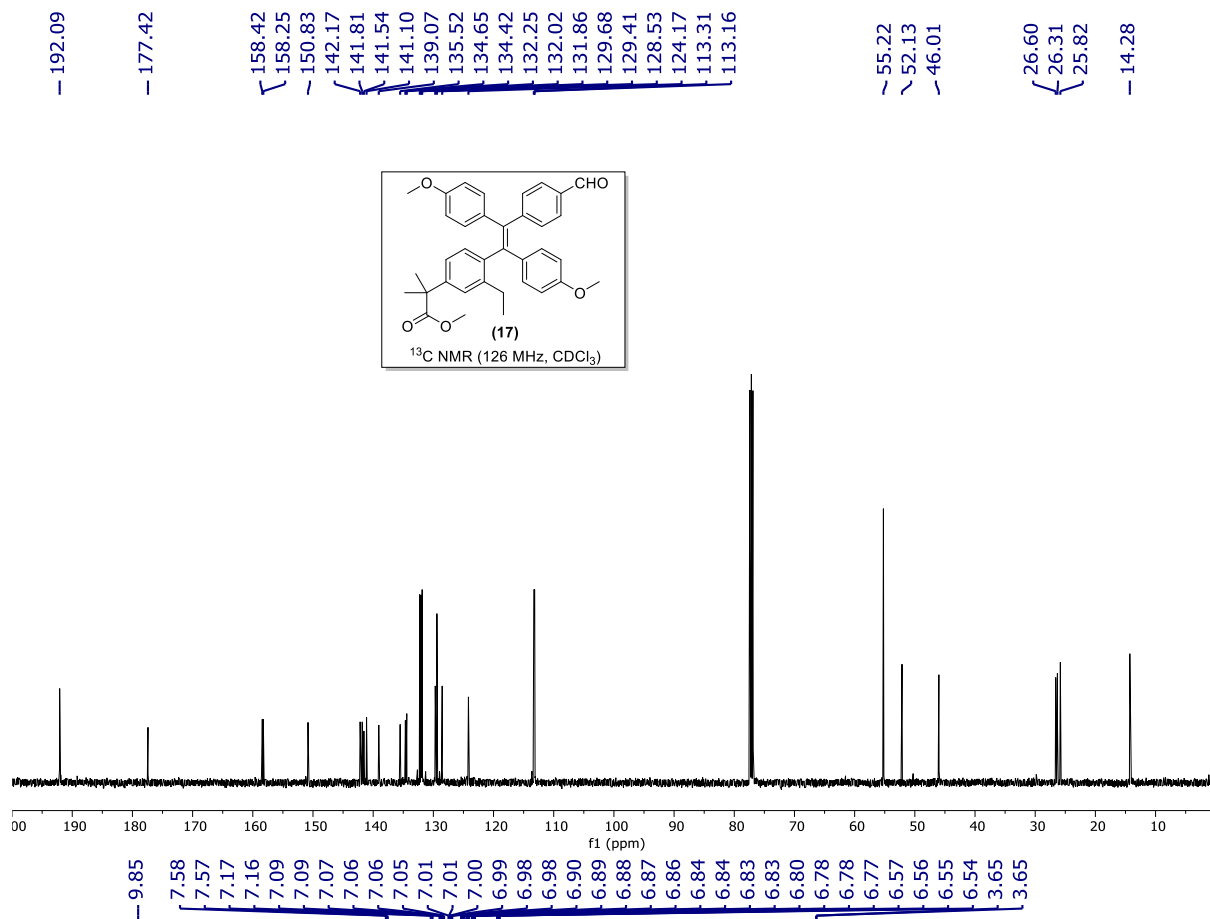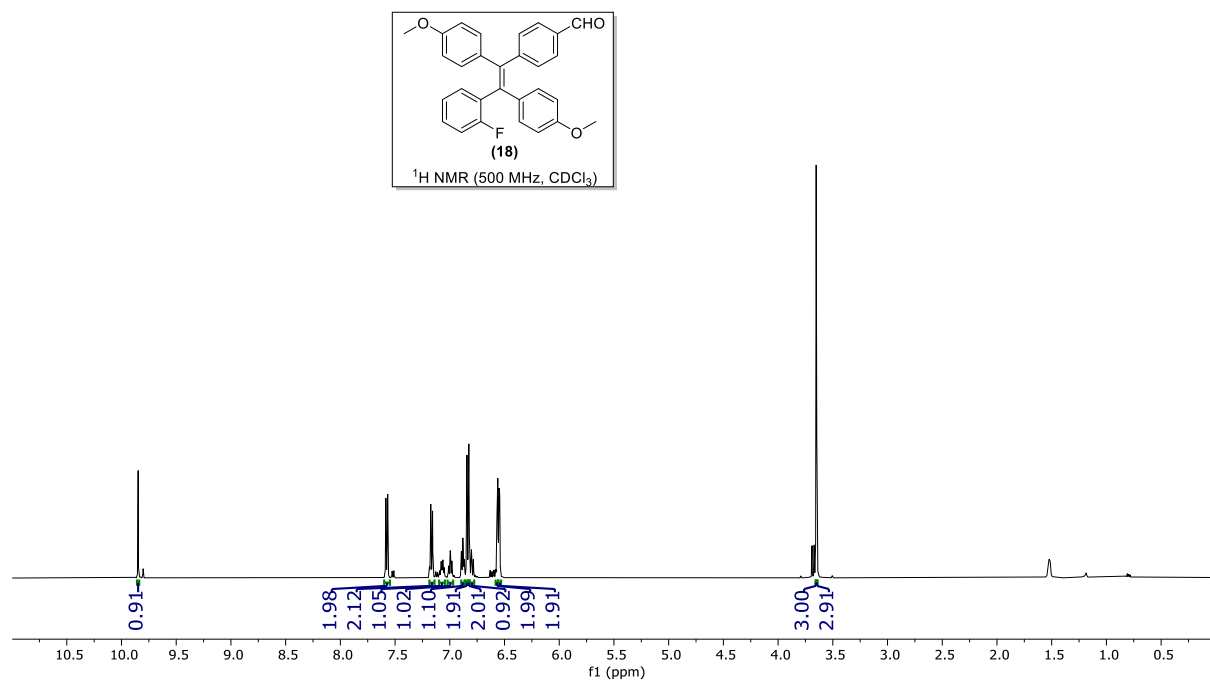

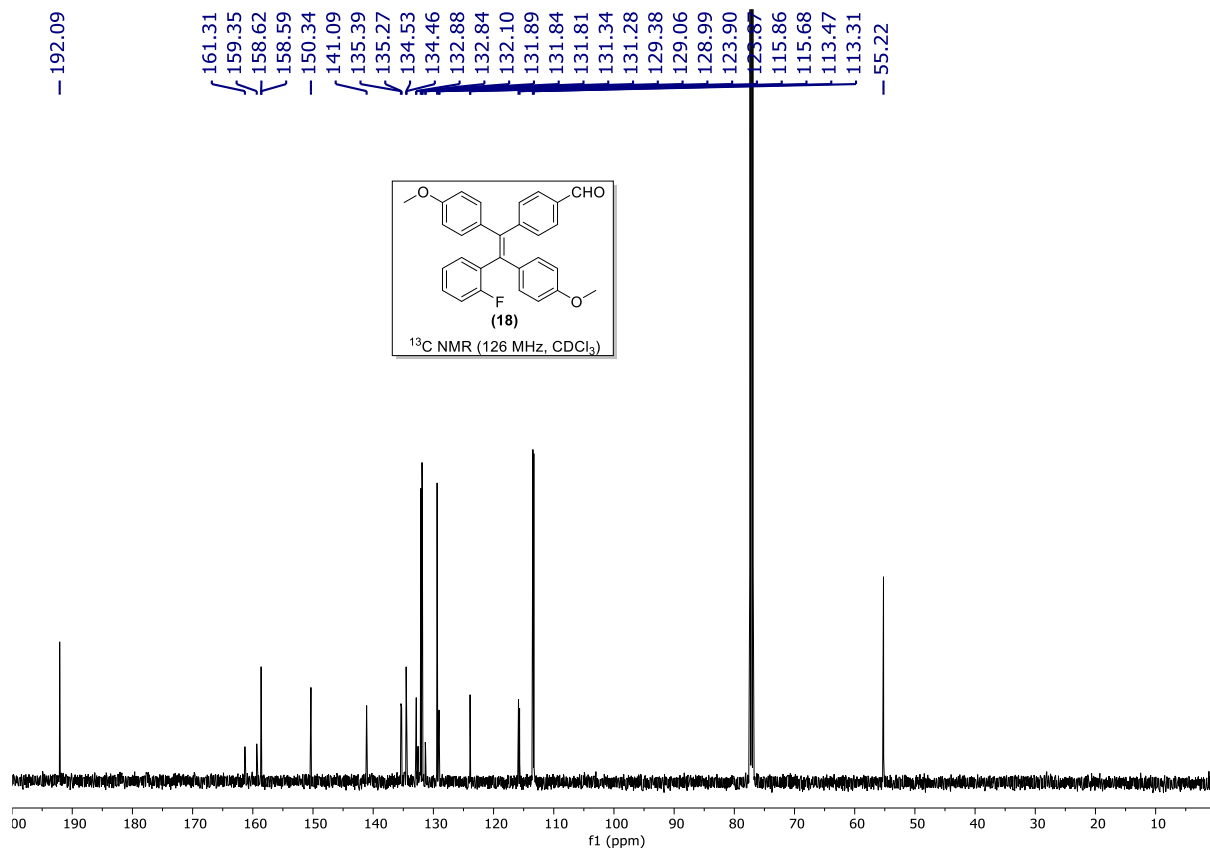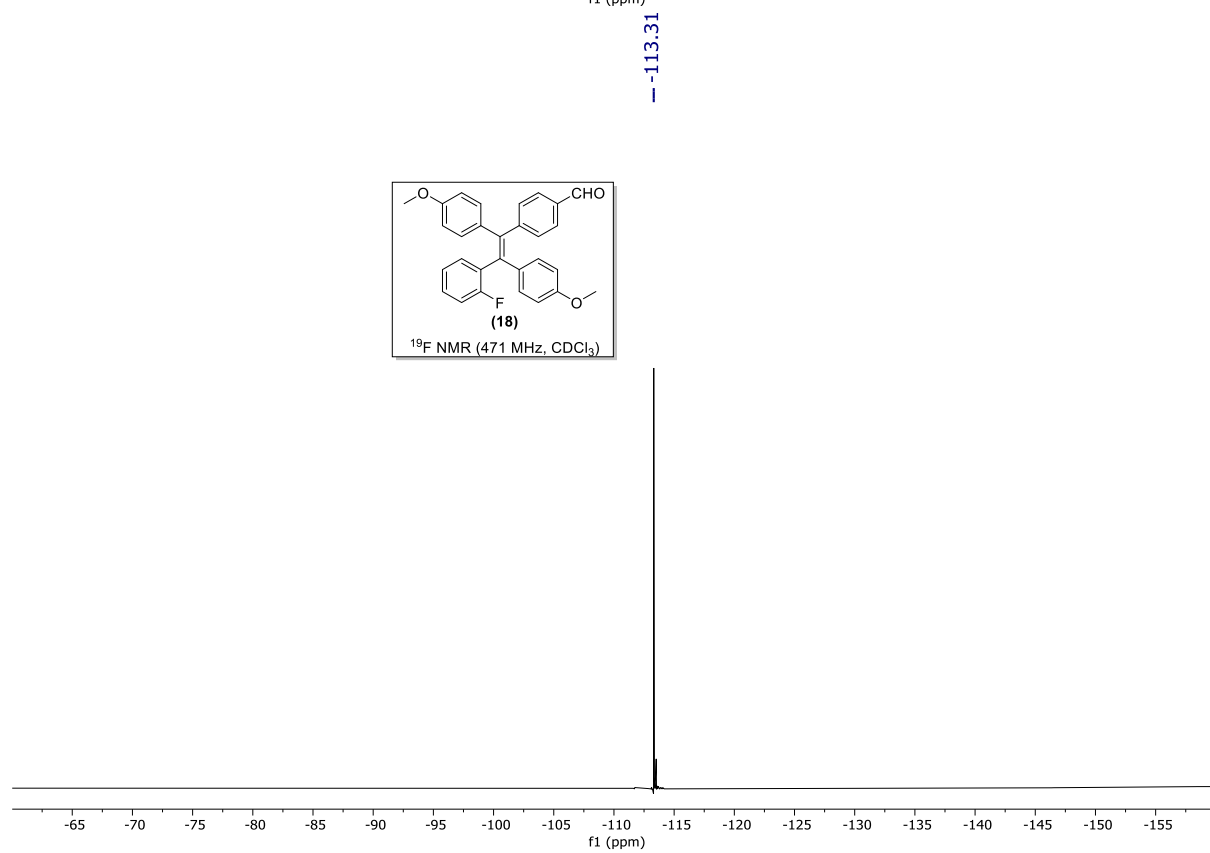

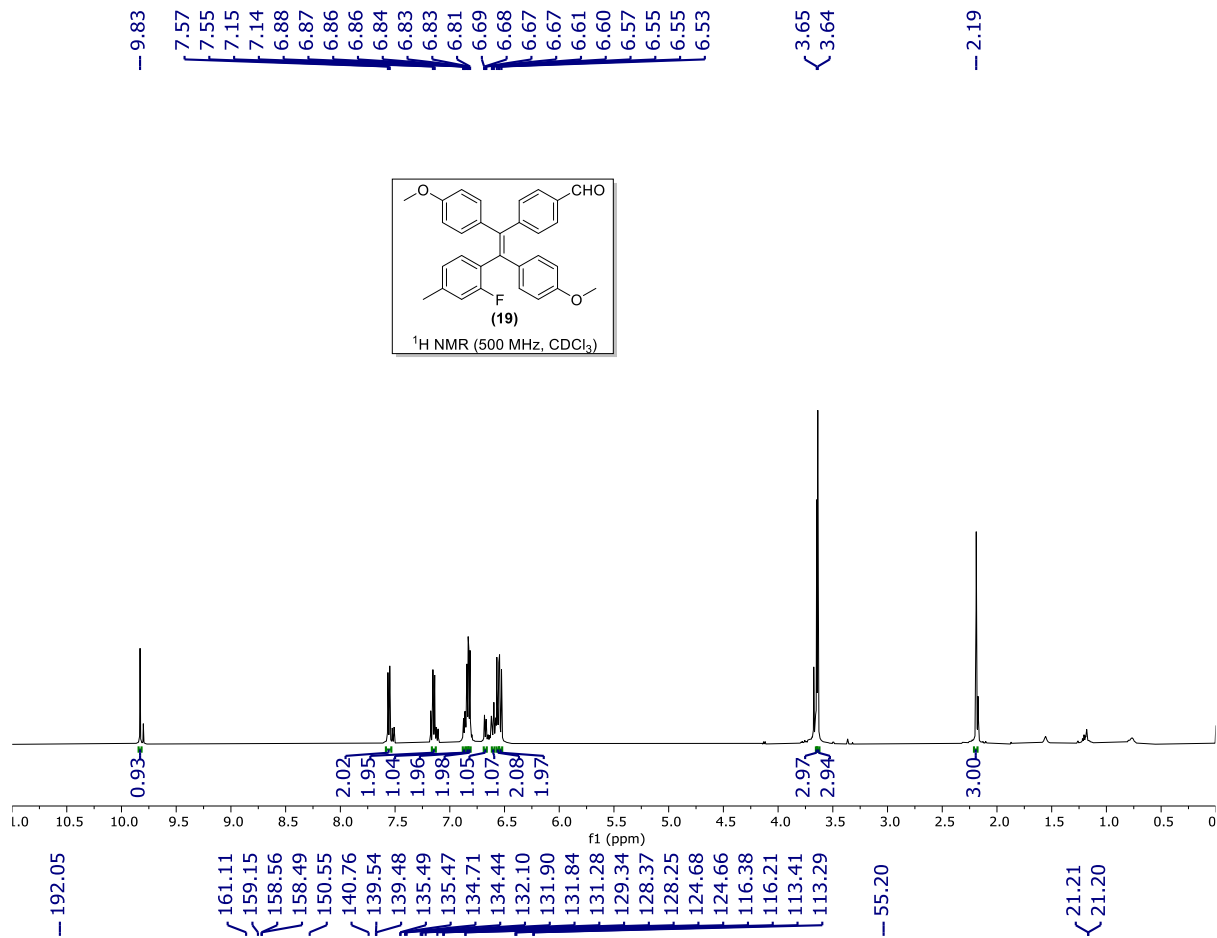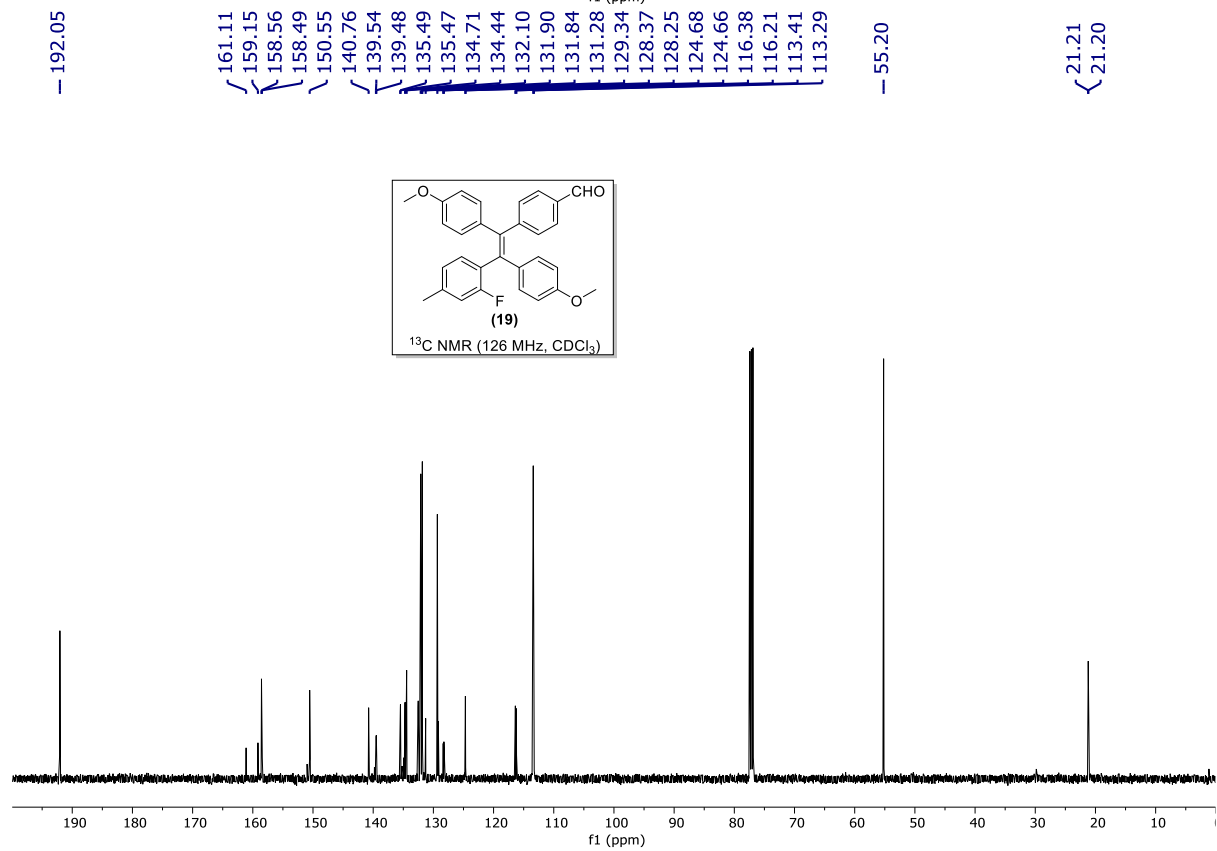

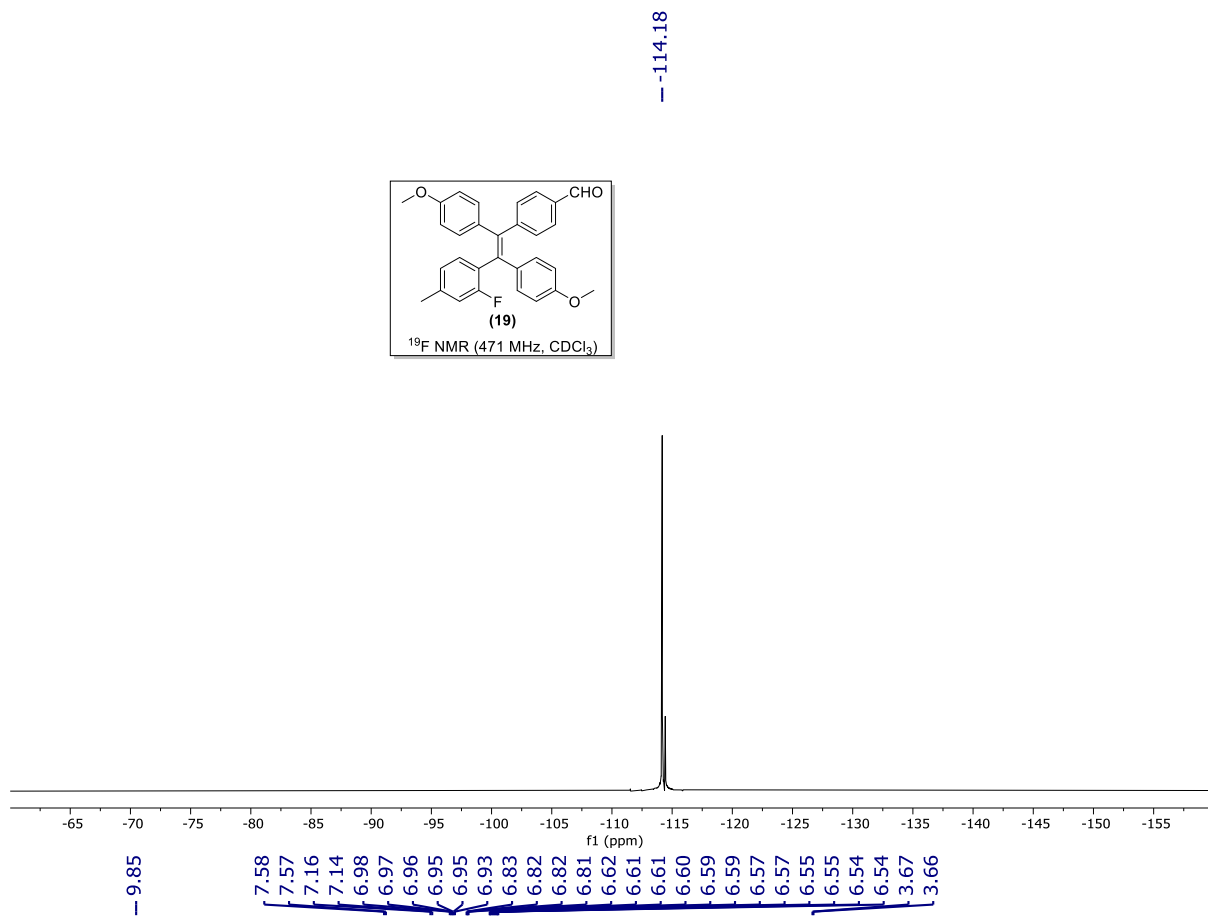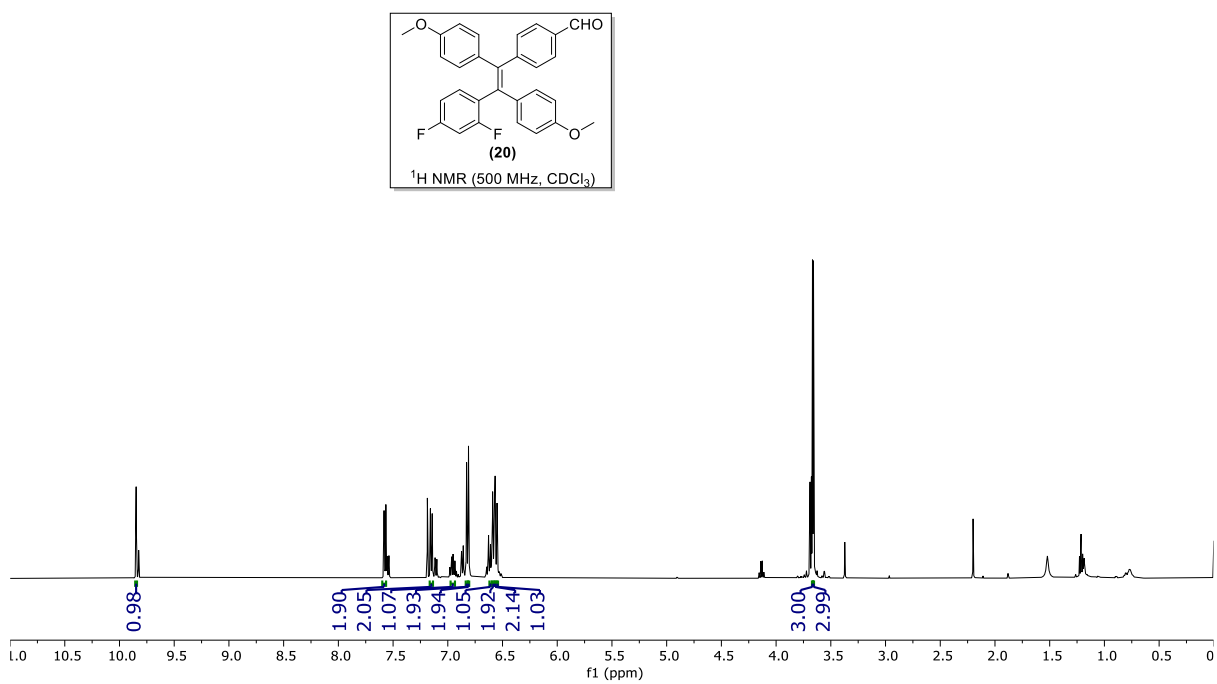

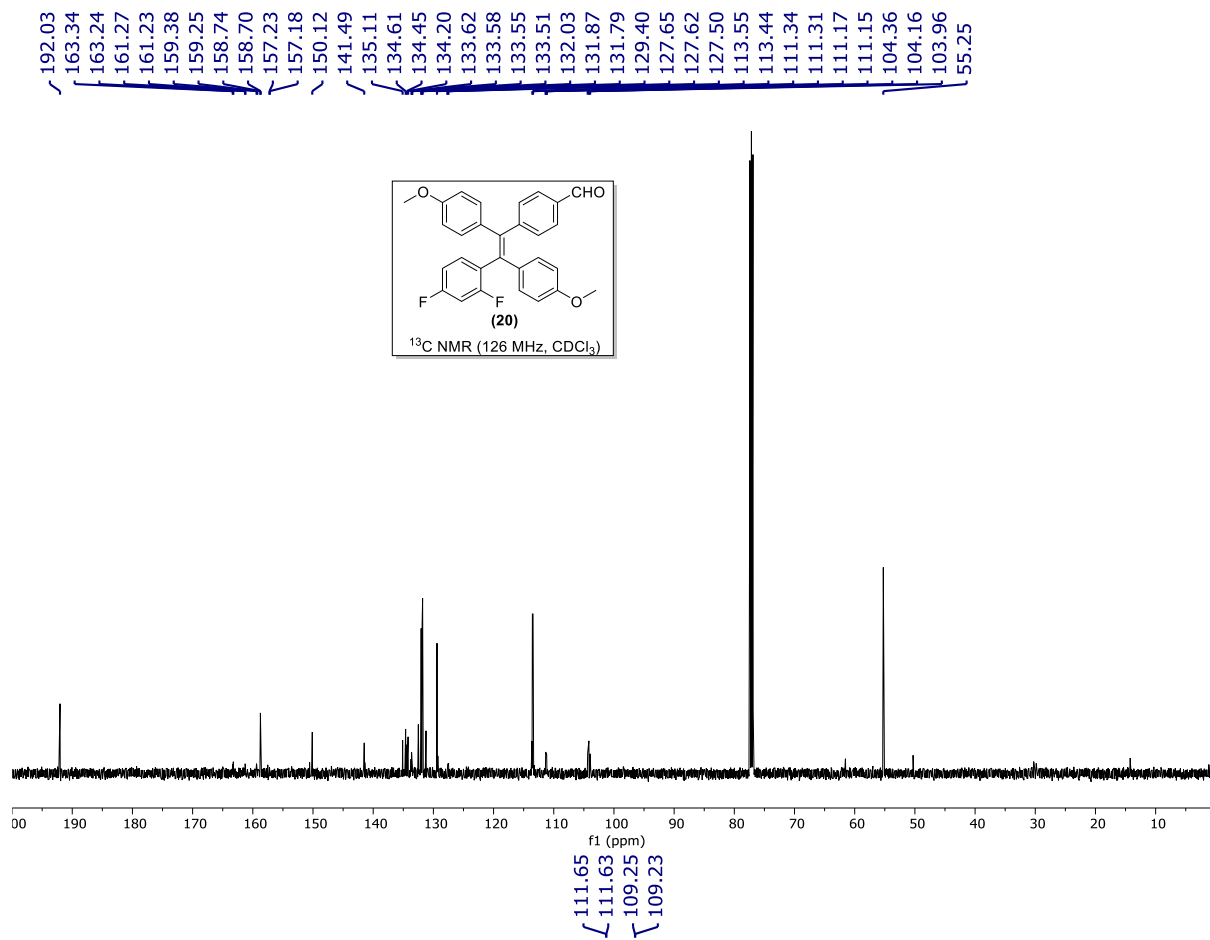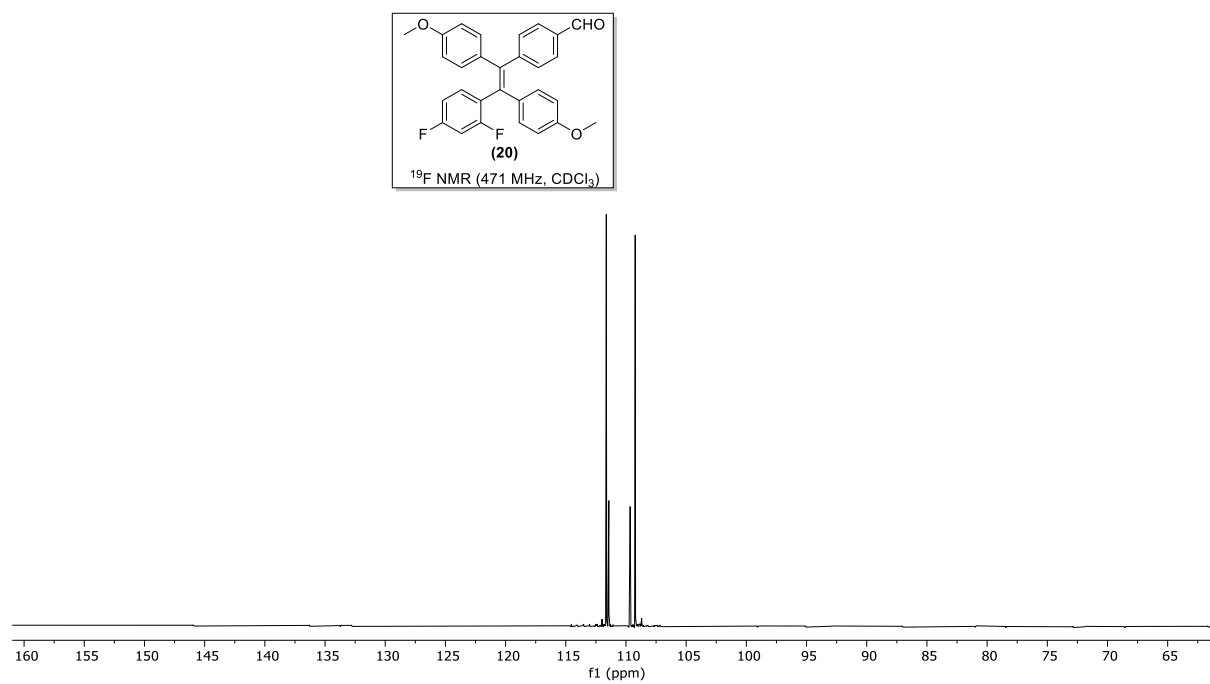

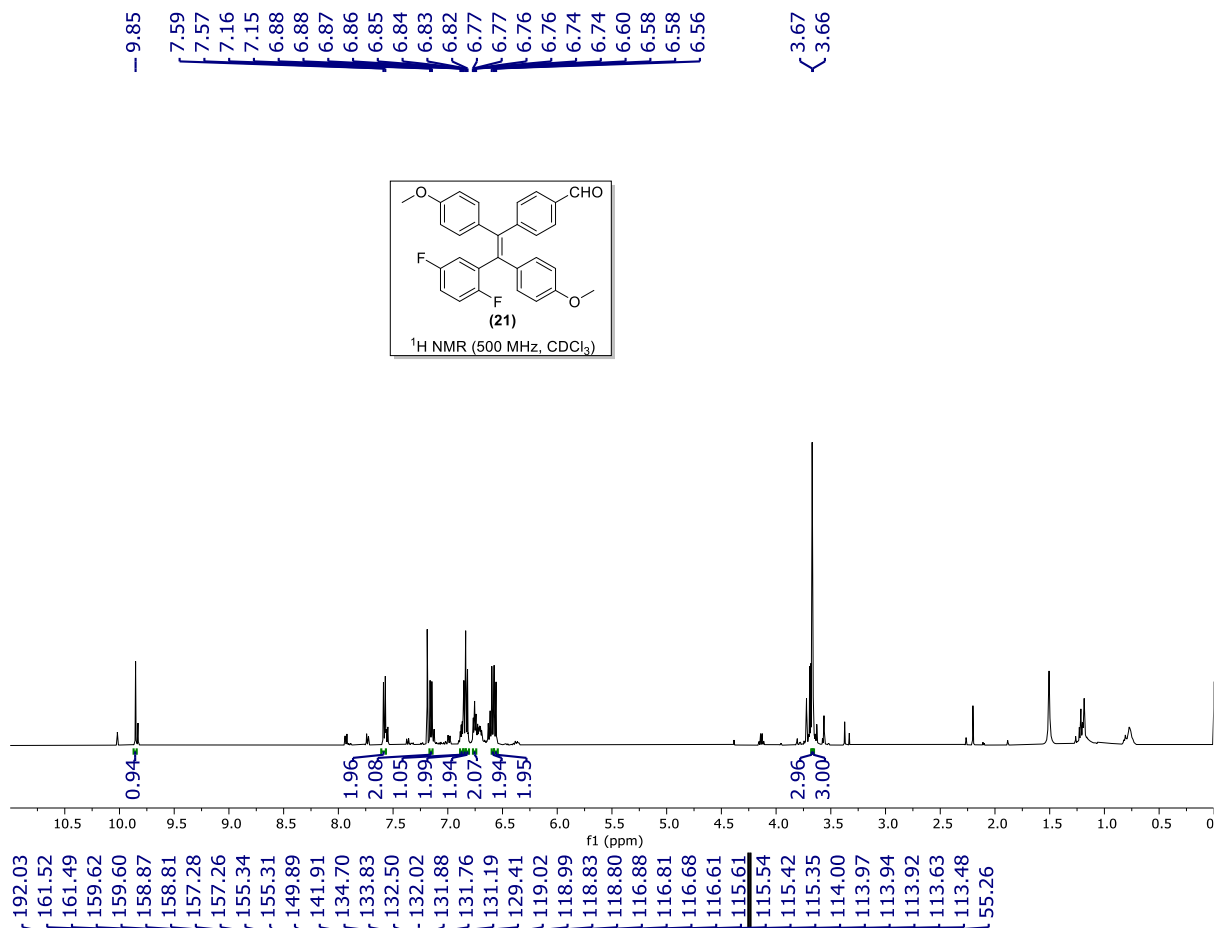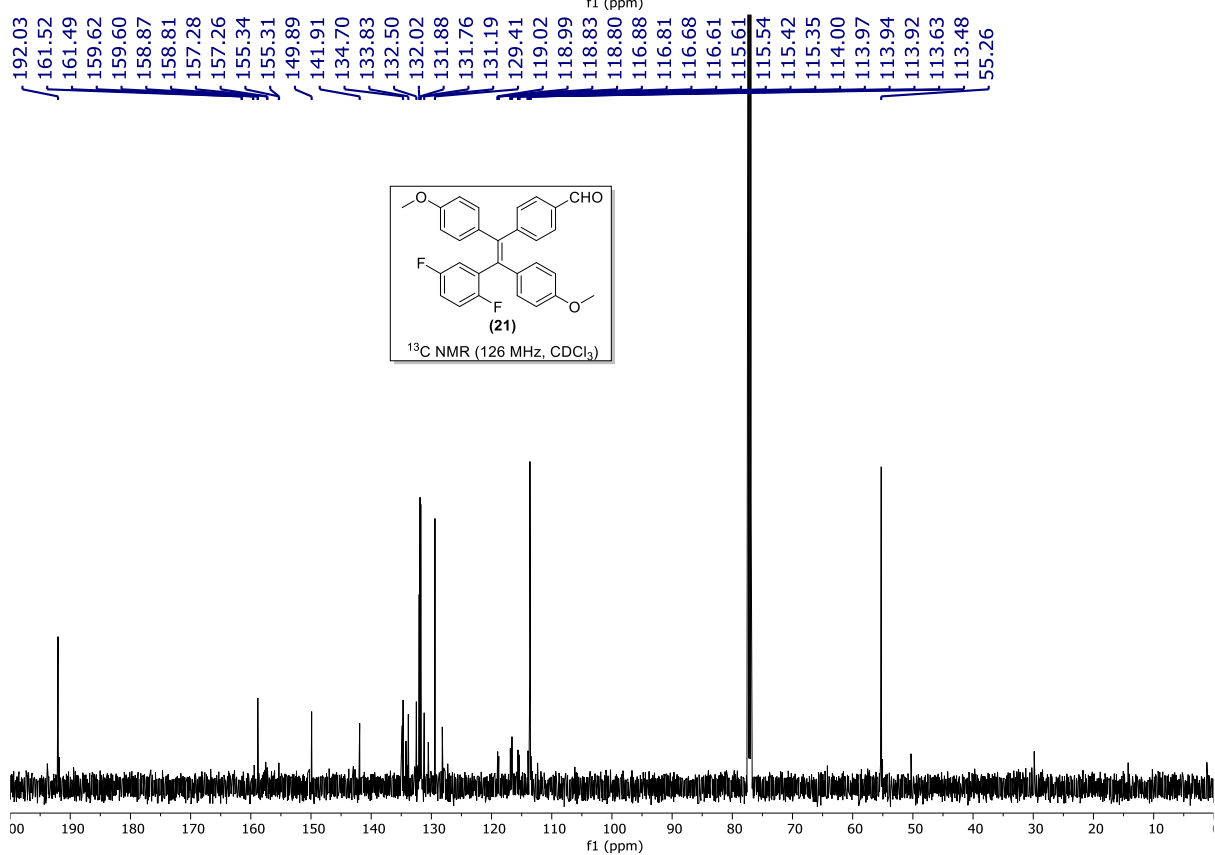

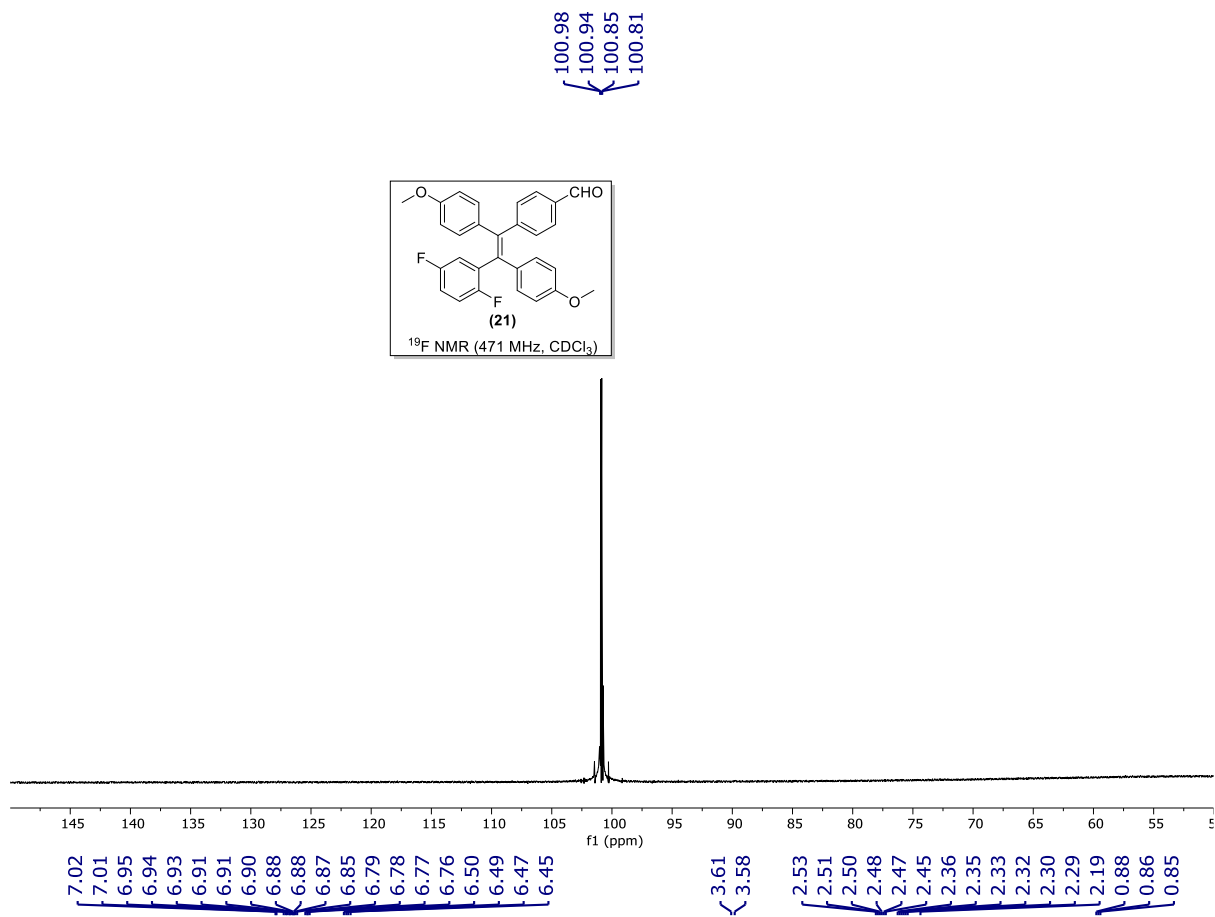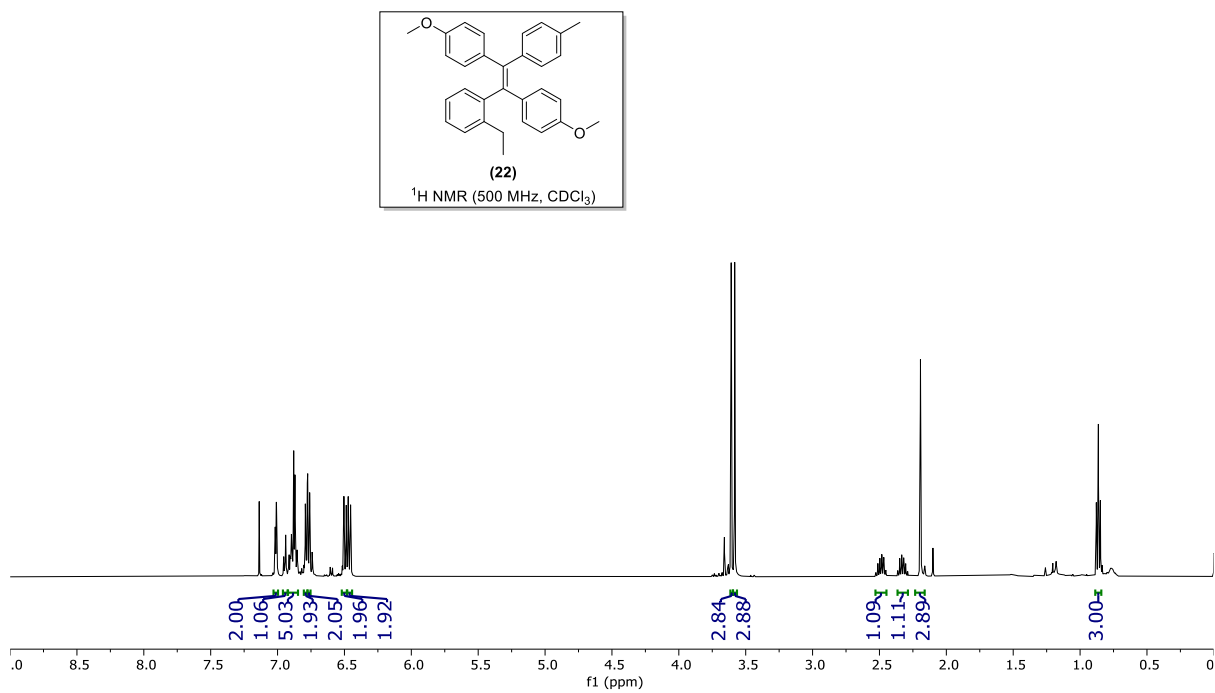

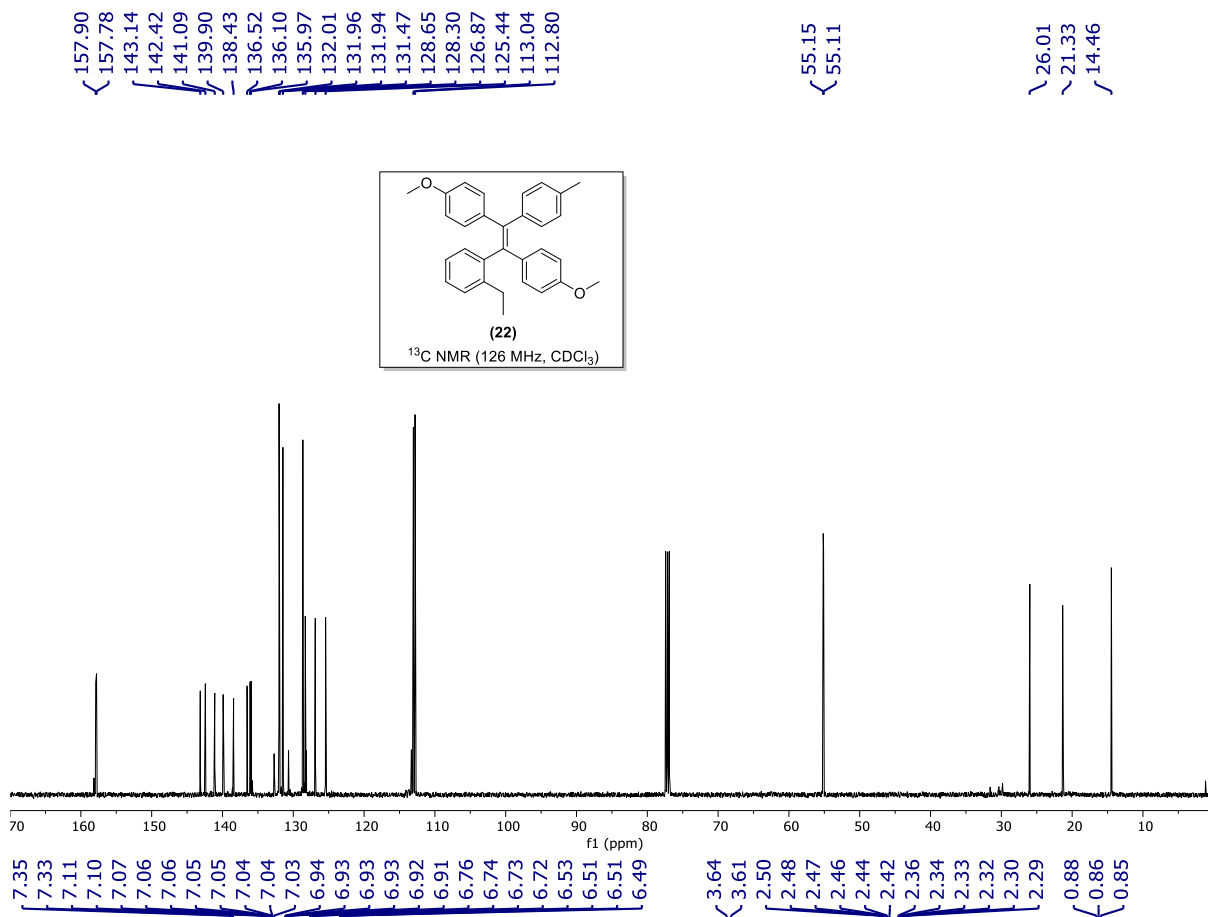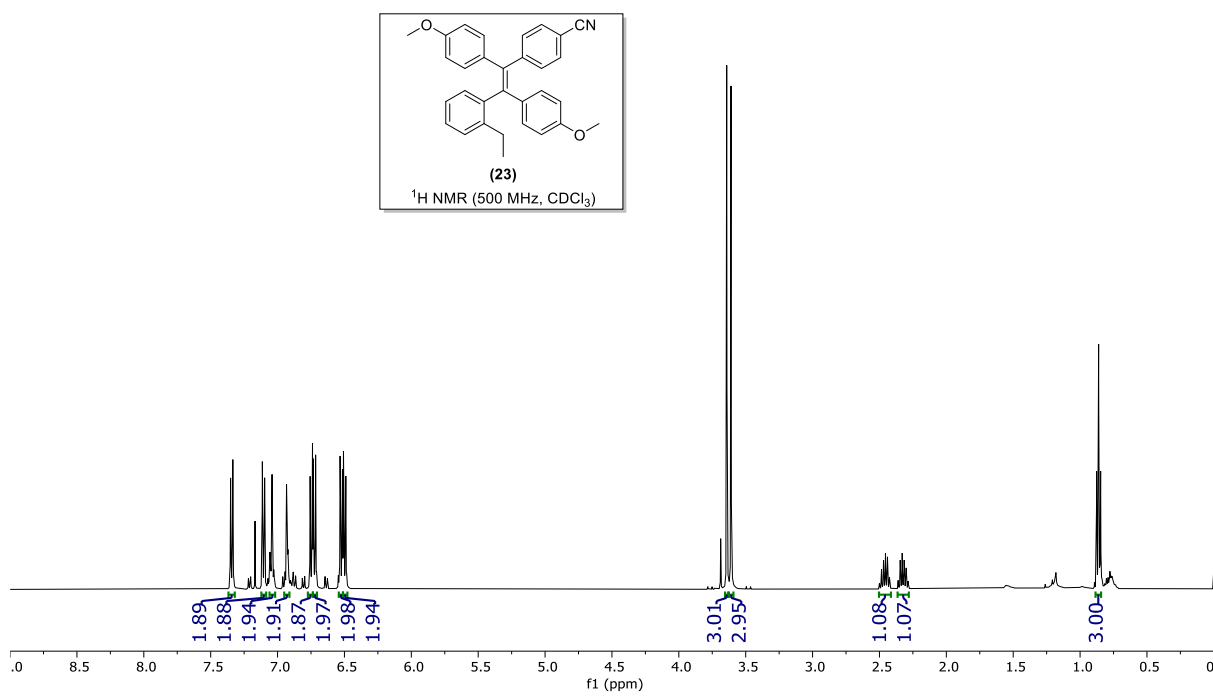



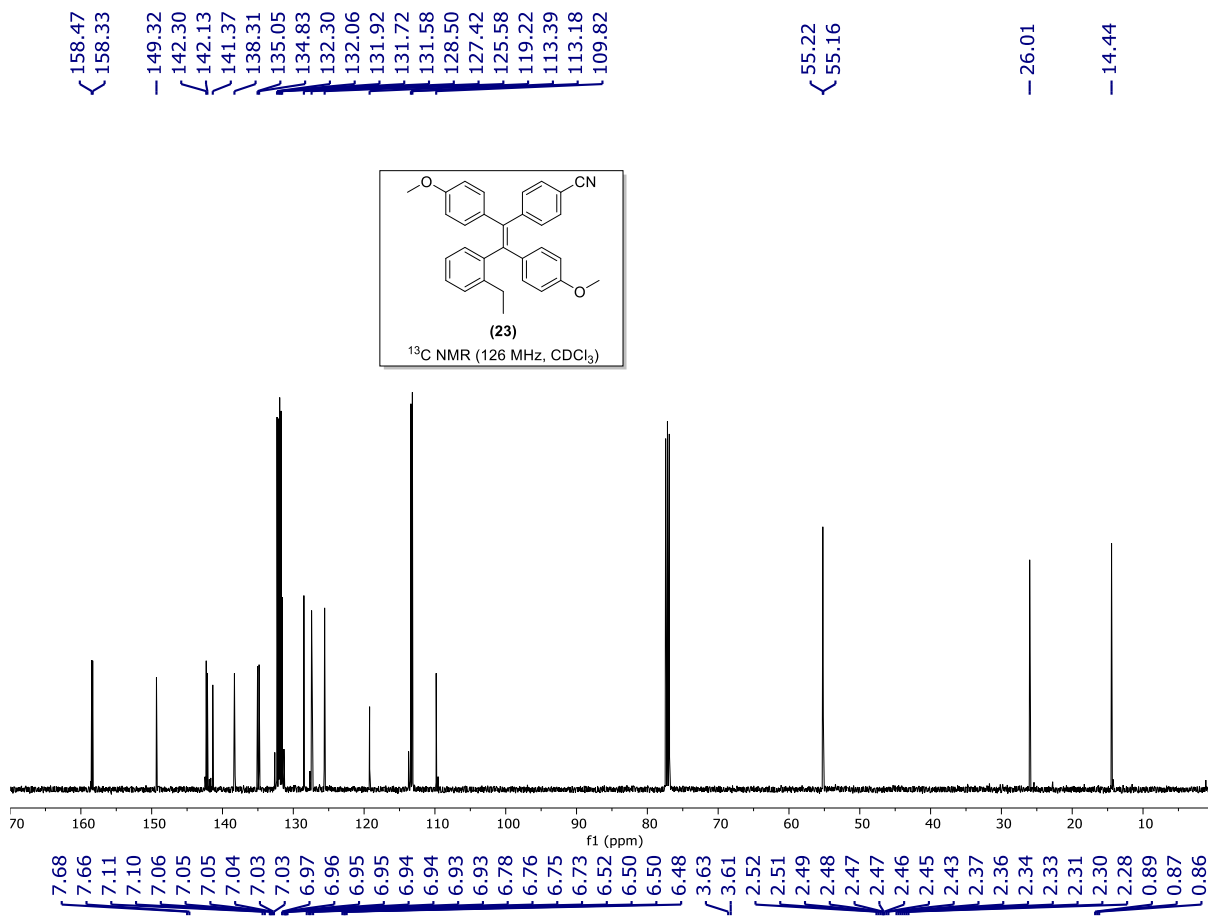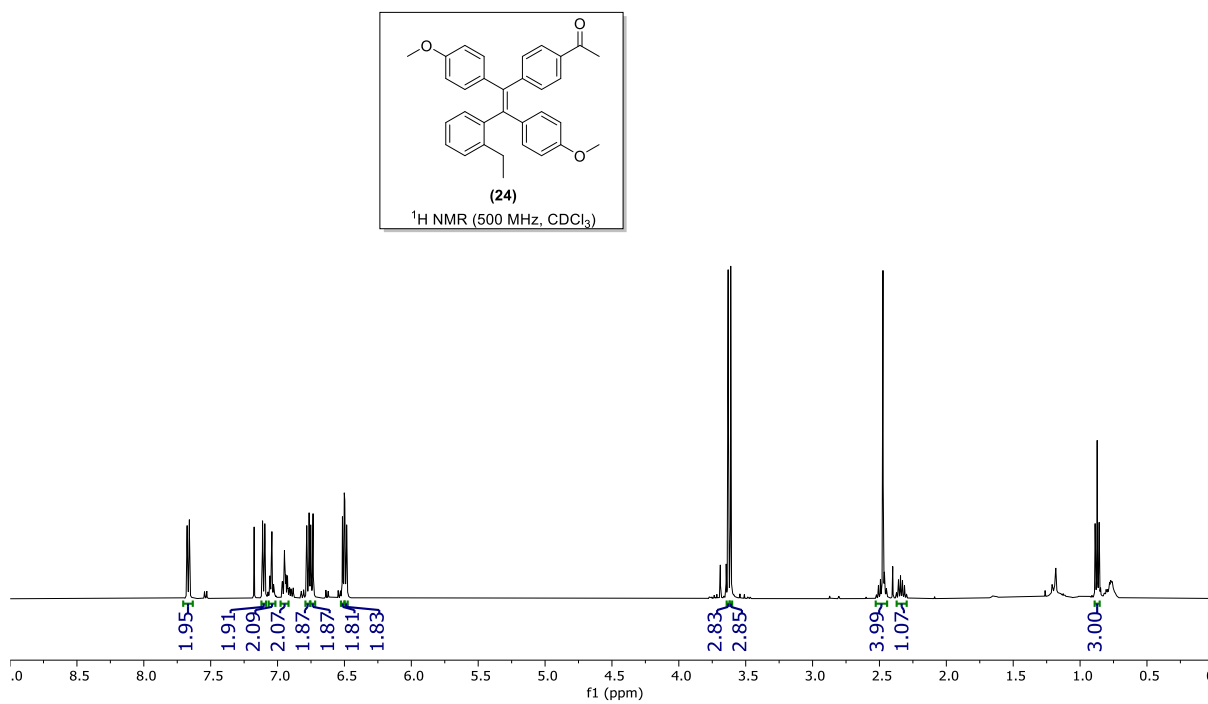

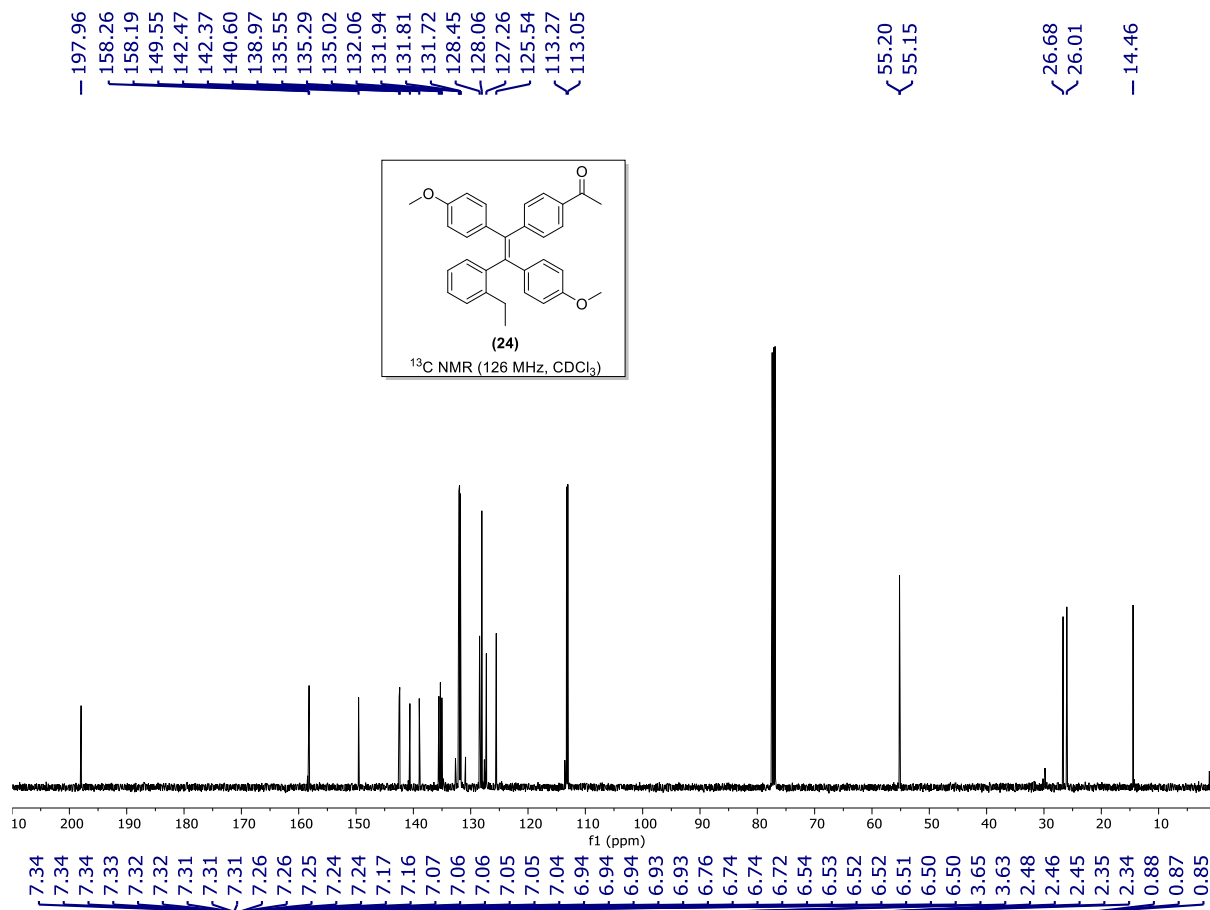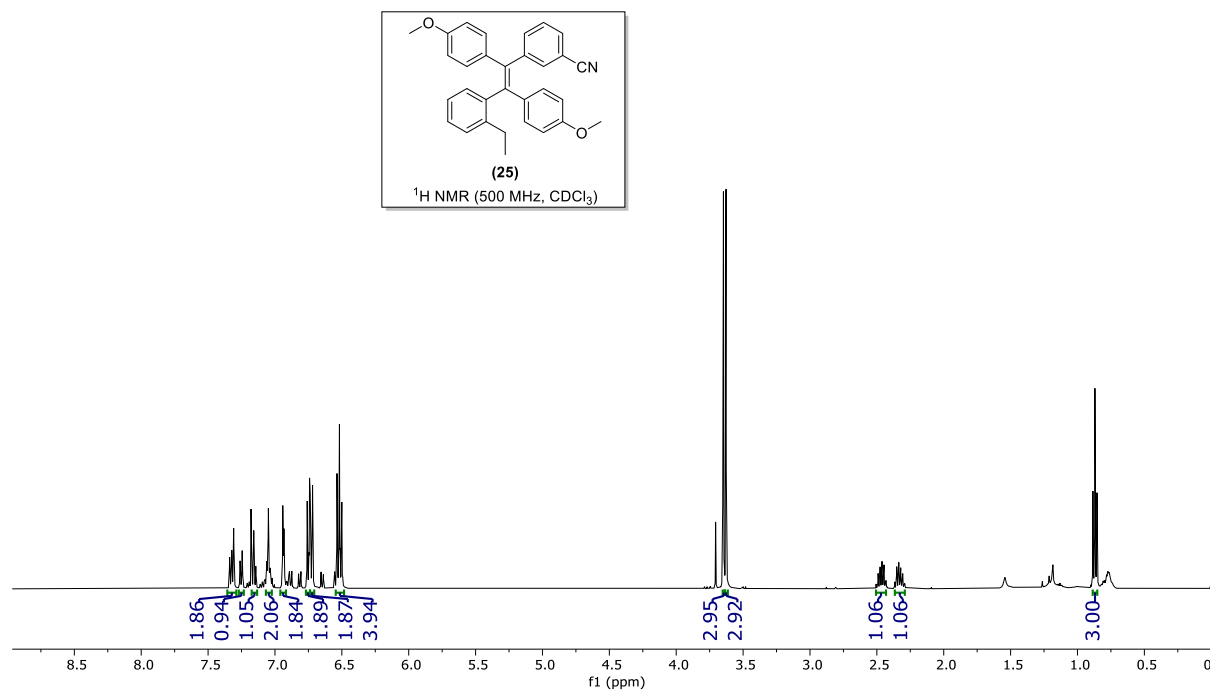

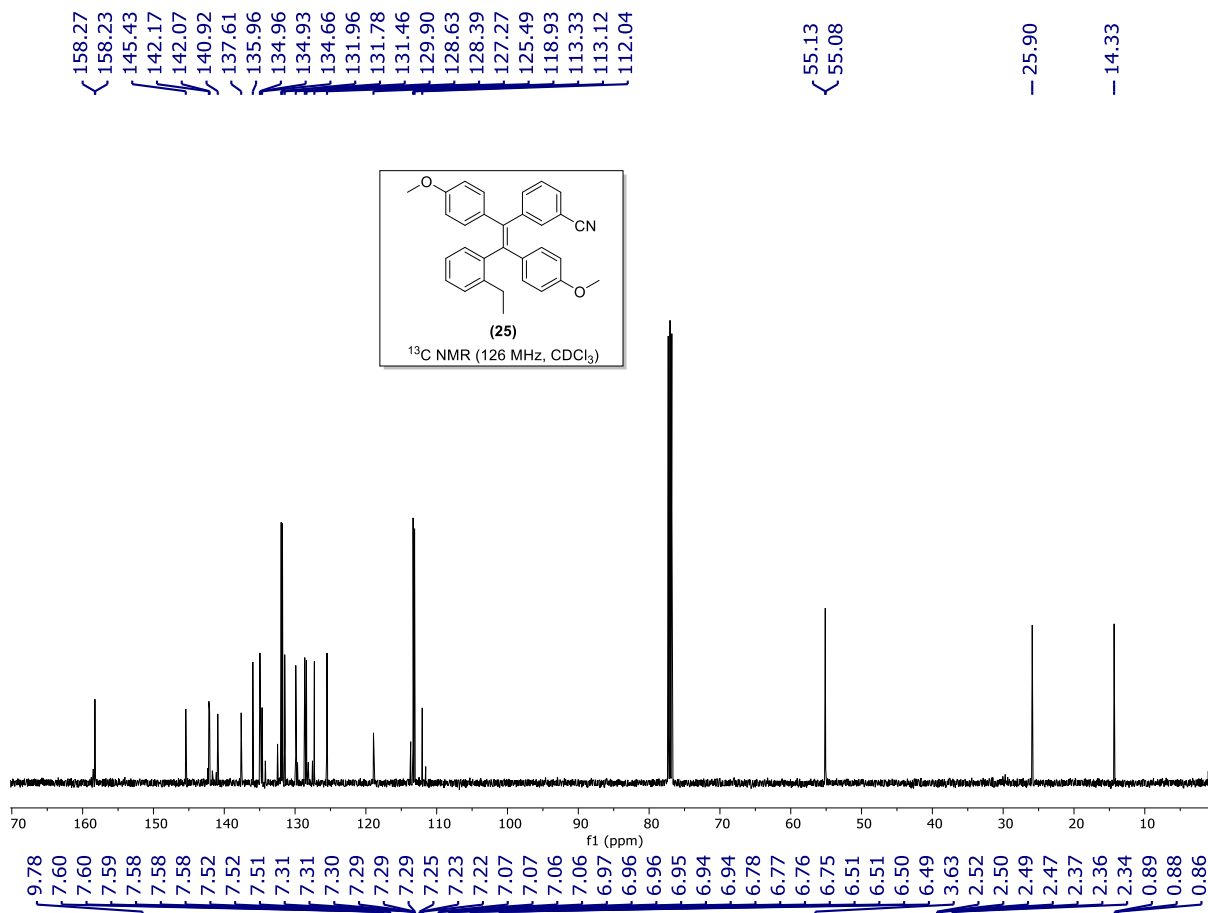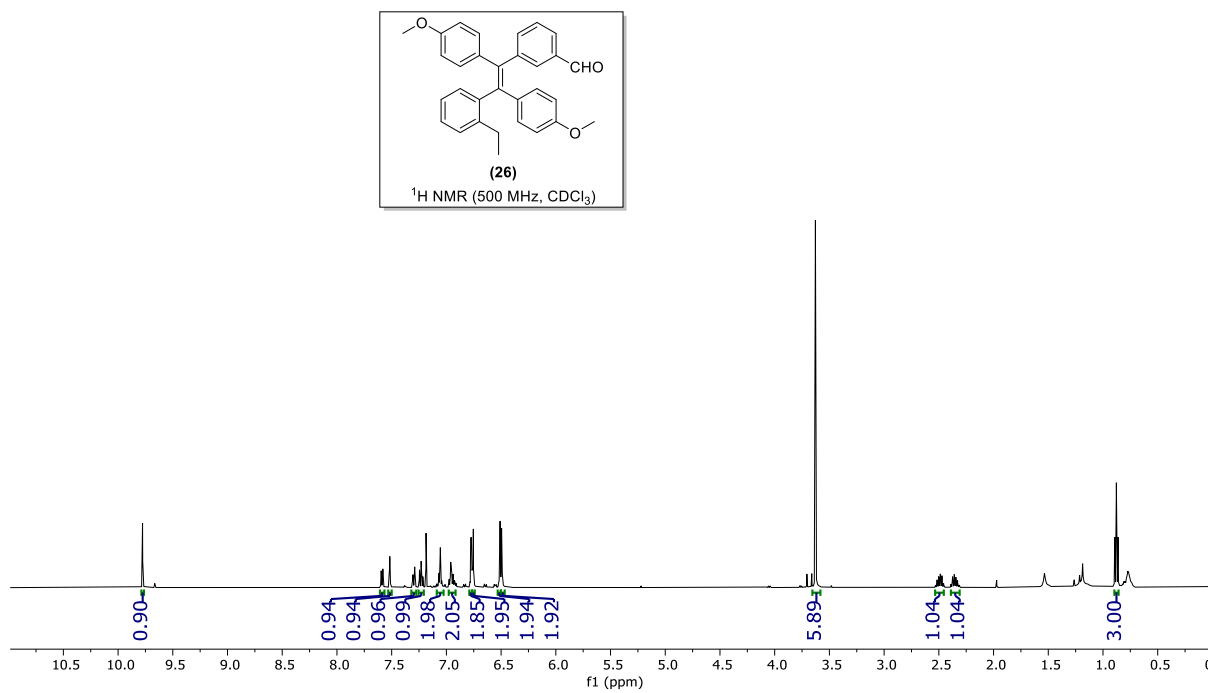

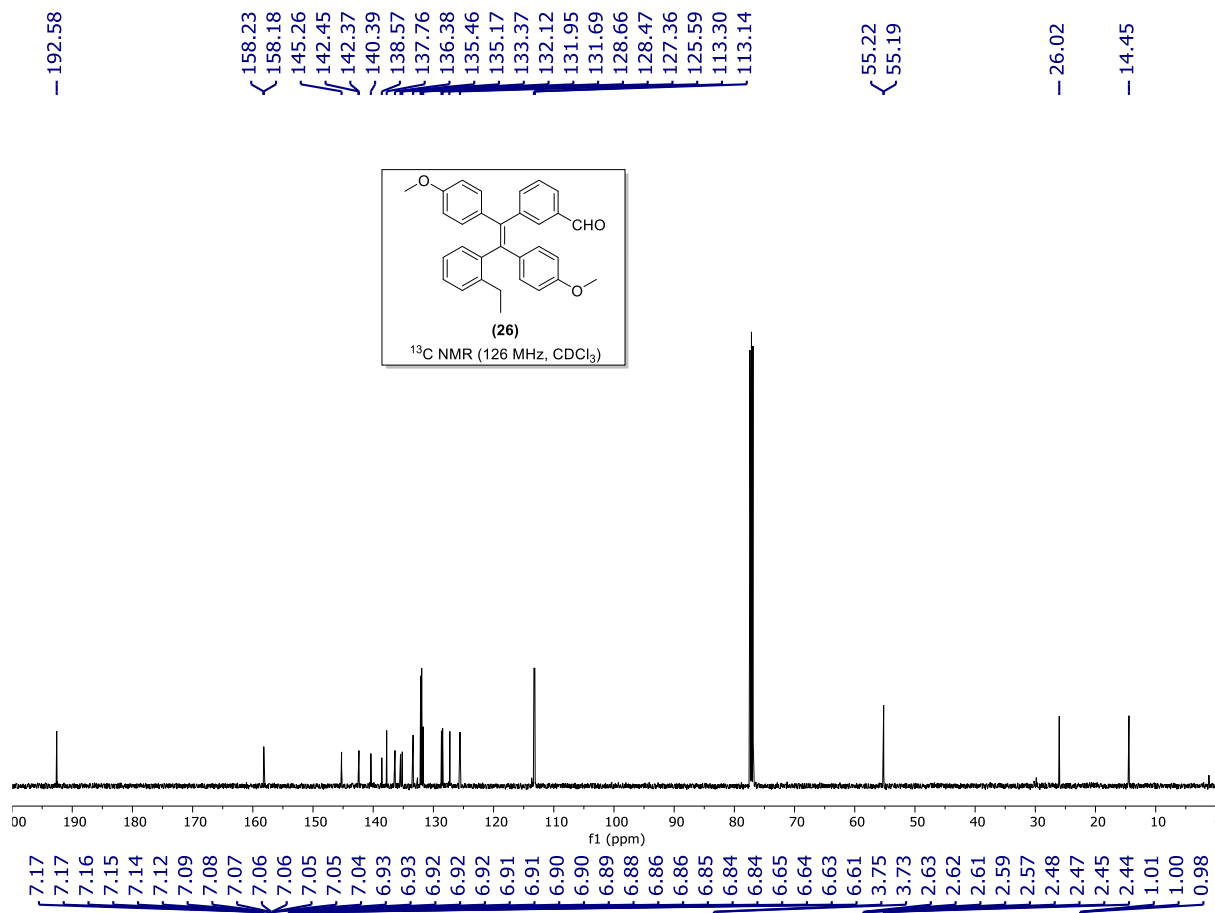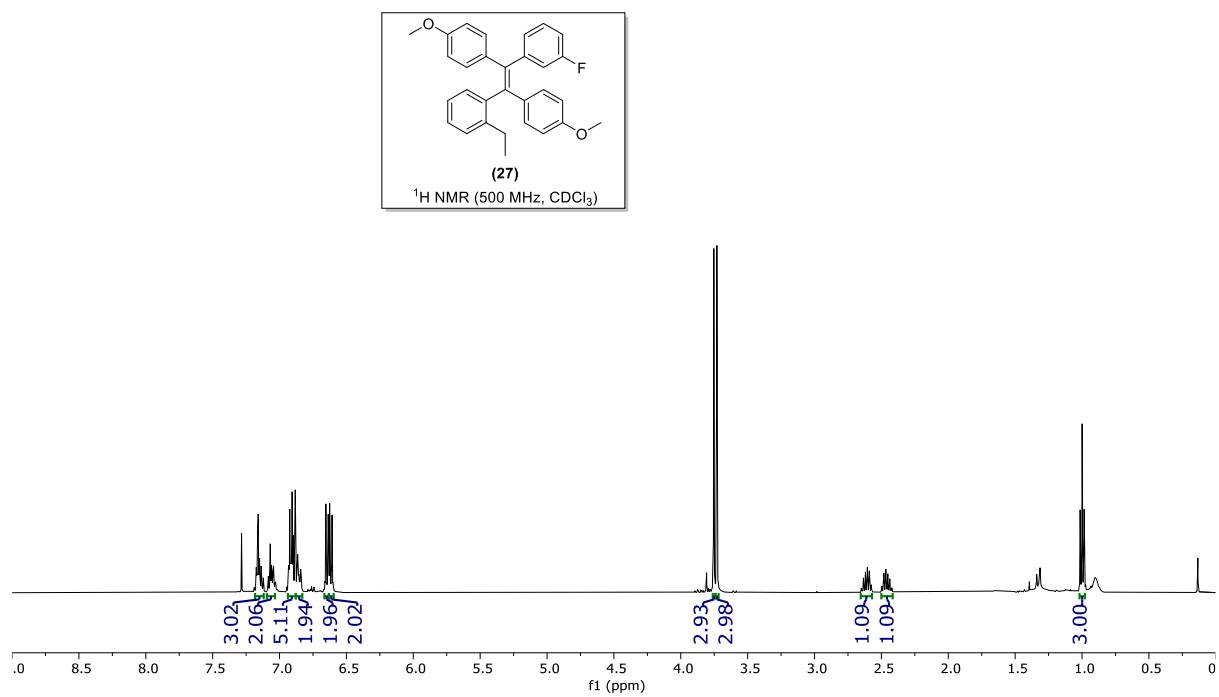

163.67  
161.72  
158.15  
158.13  
146.47  
146.41  
142.61  
142.36  
139.81  
138.75  
138.74  
135.67  
135.42  
131.94  
131.89  
131.75  
129.30  
129.24  
128.41  
127.40  
127.38  
127.16  
125.52  
118.39  
118.22  
113.46  
113.29  
113.21  
112.99

55.19  
55.14

25.99

14.46

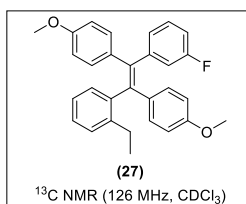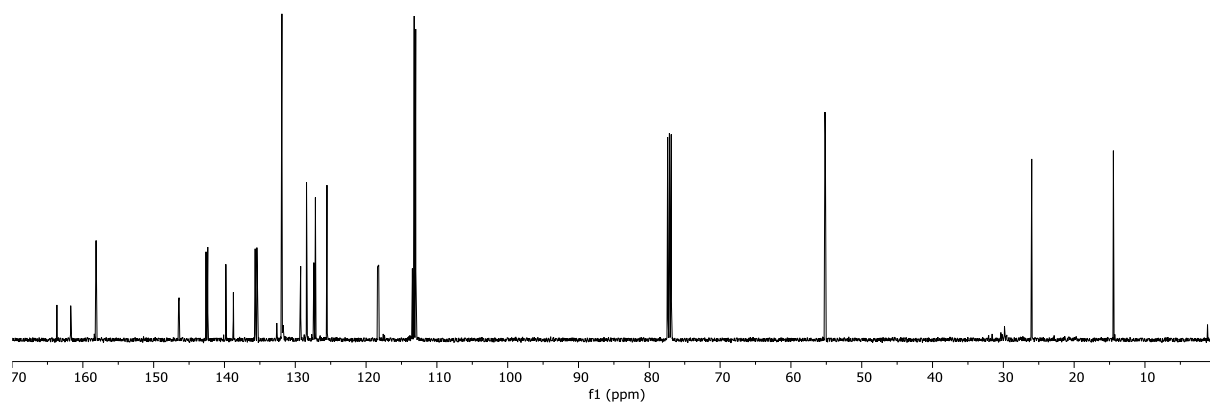

-113.96

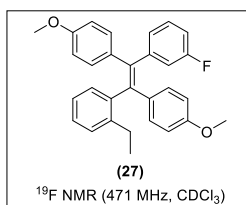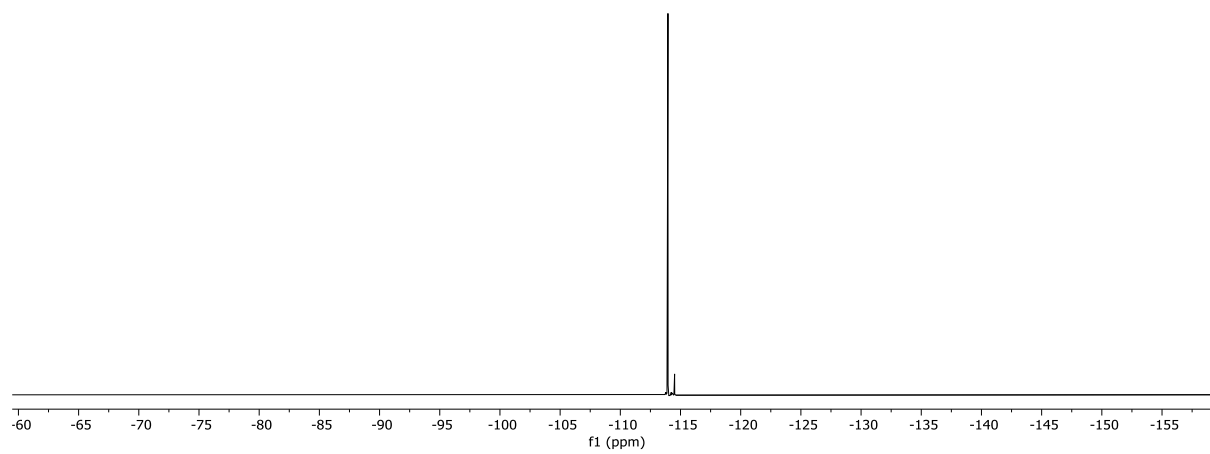

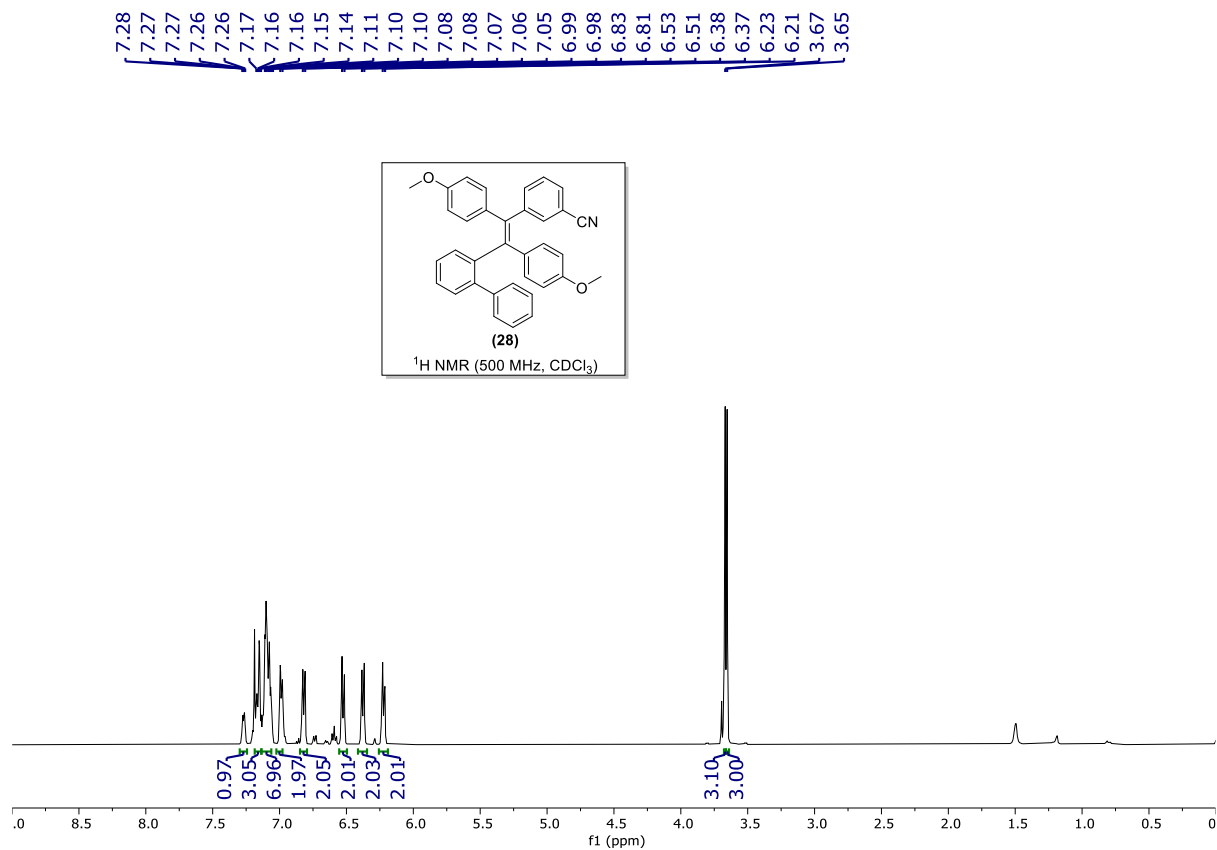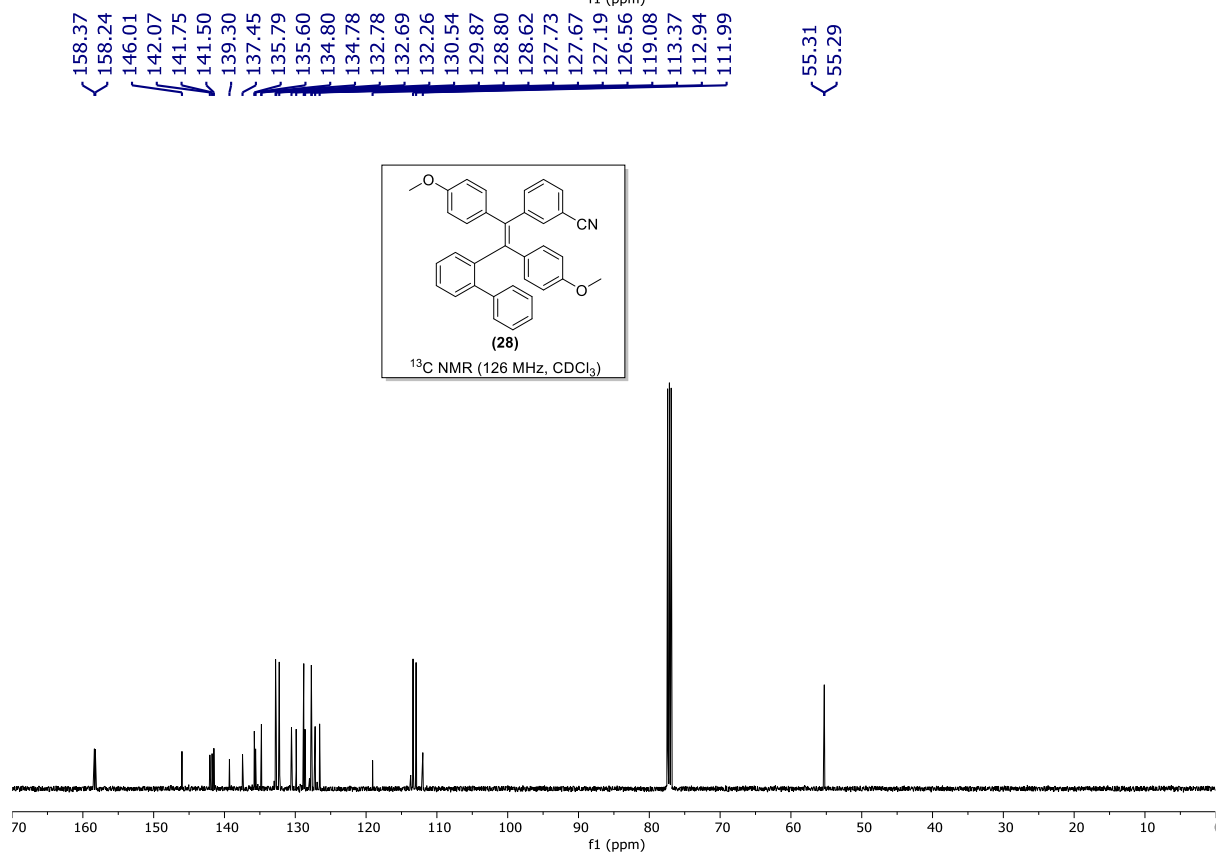

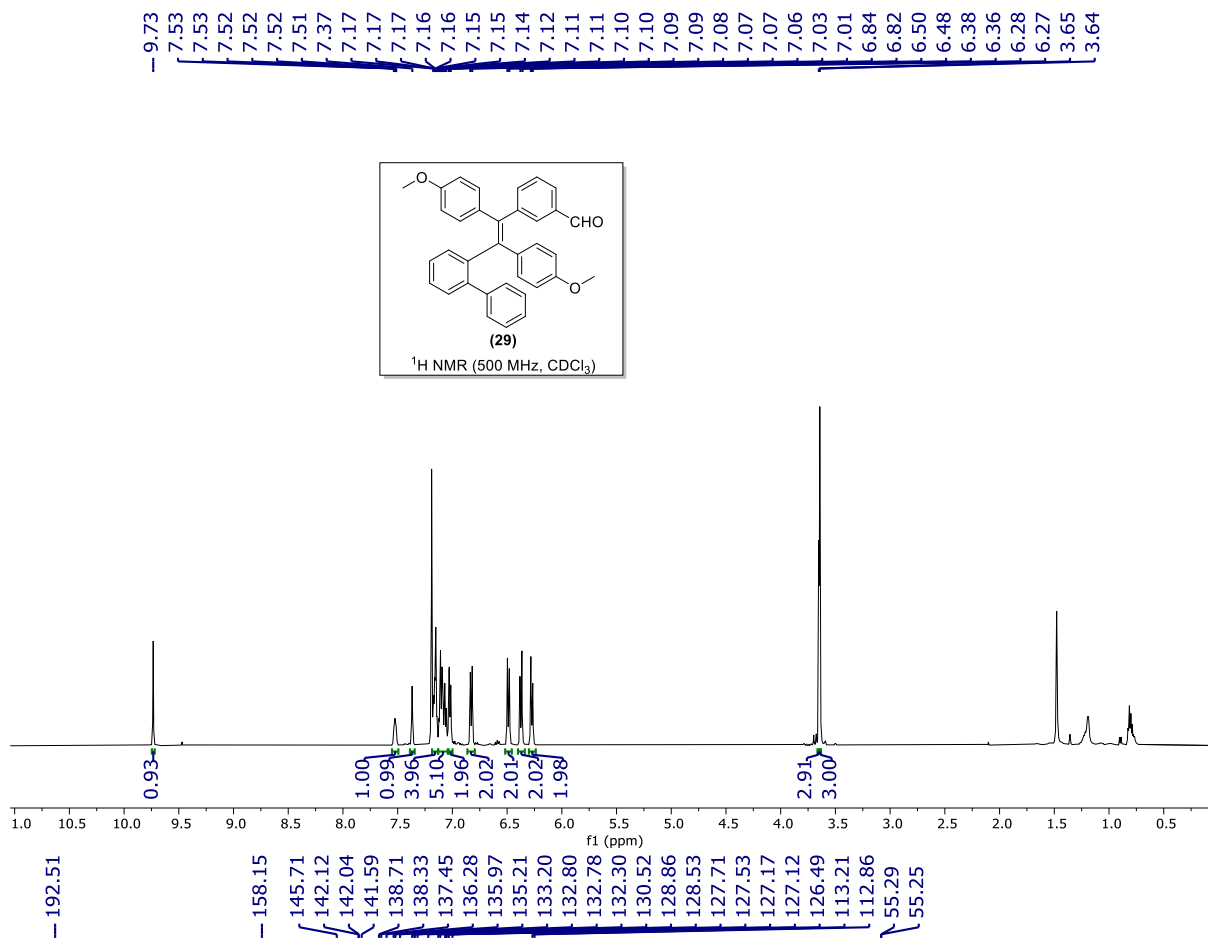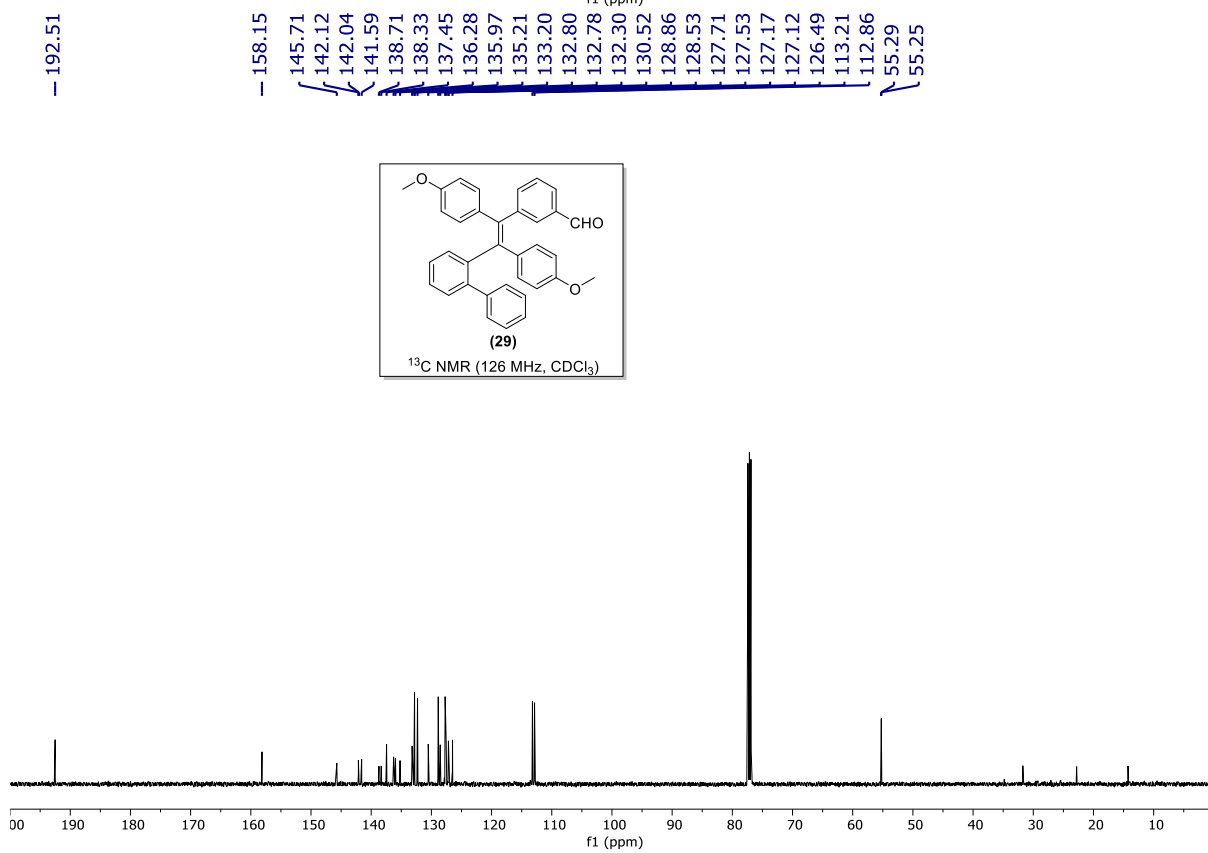

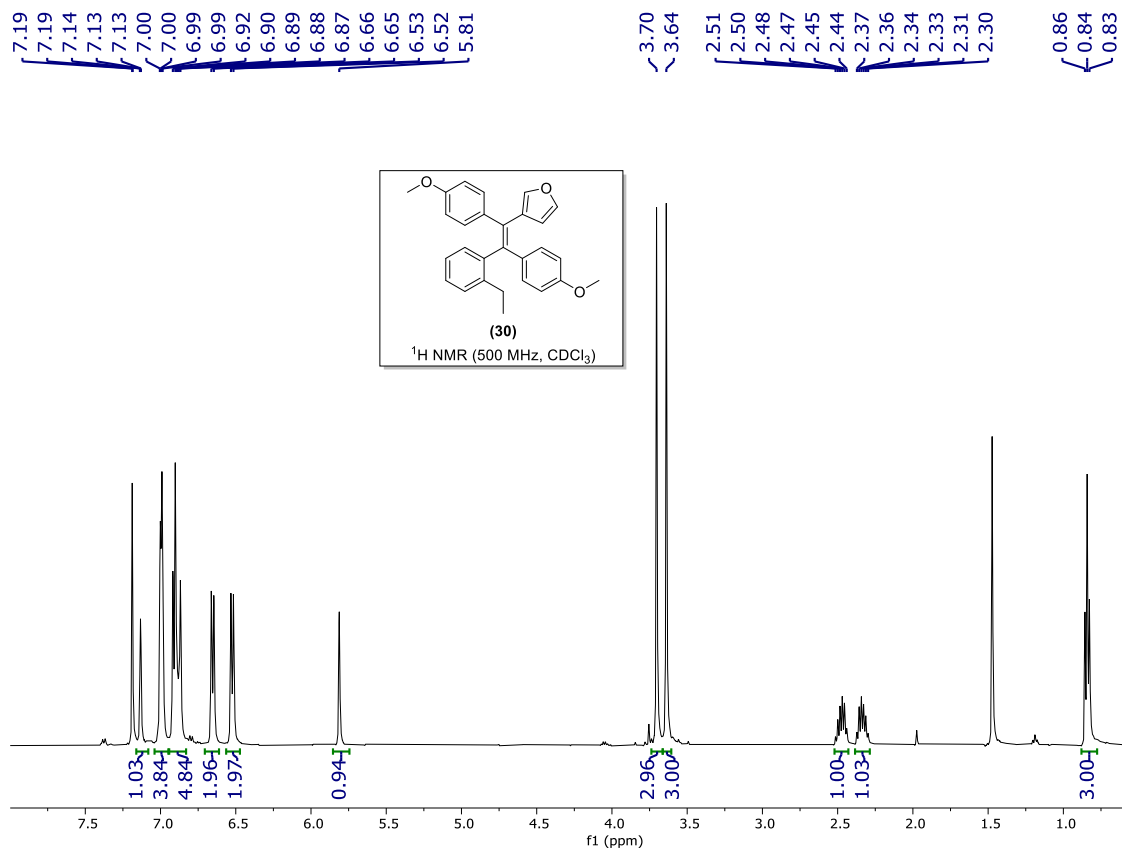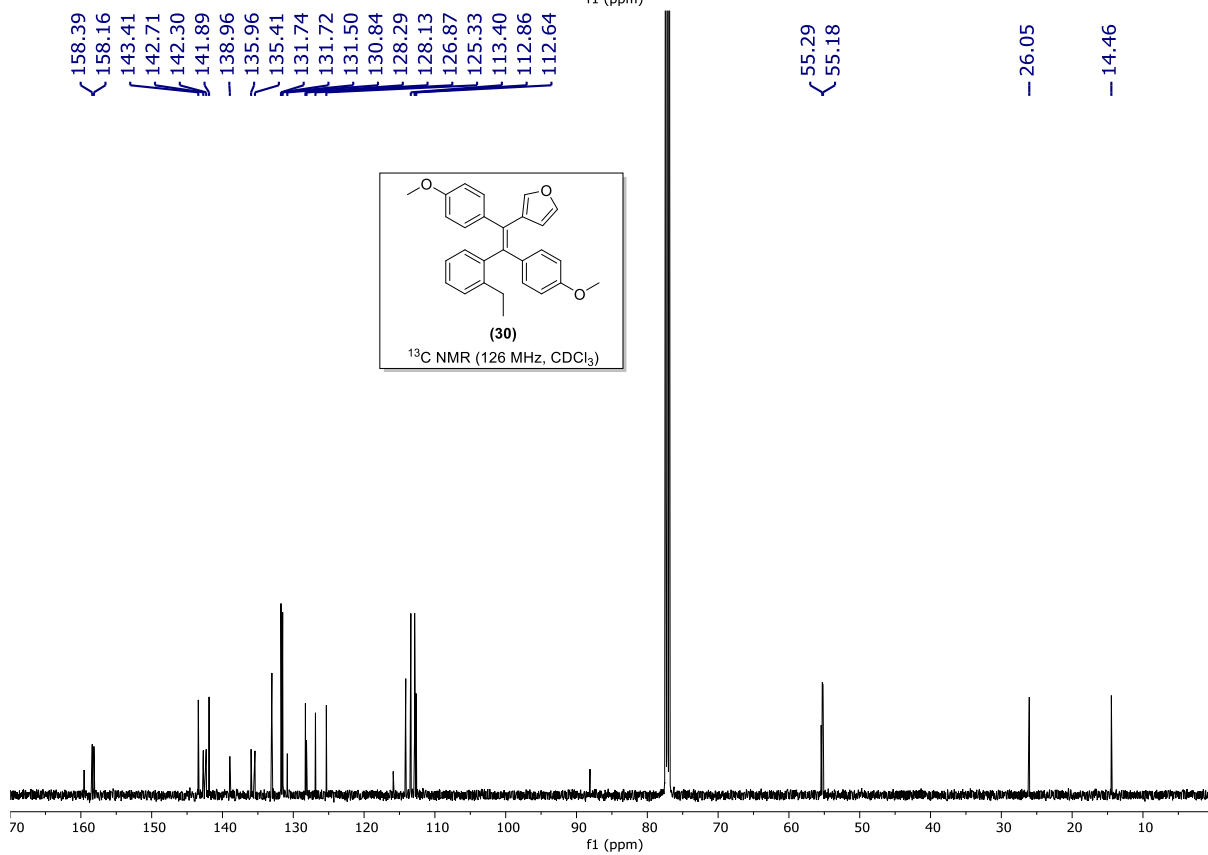



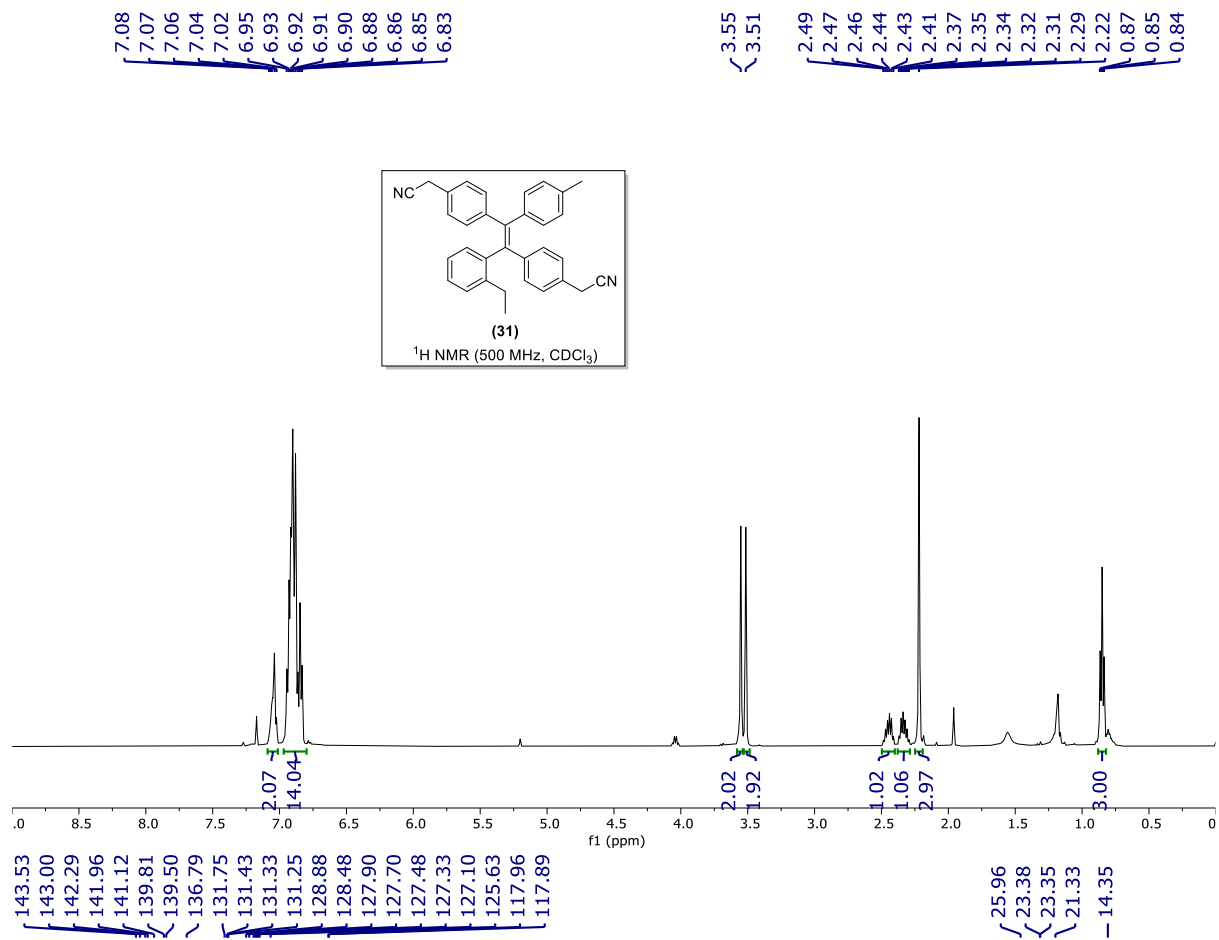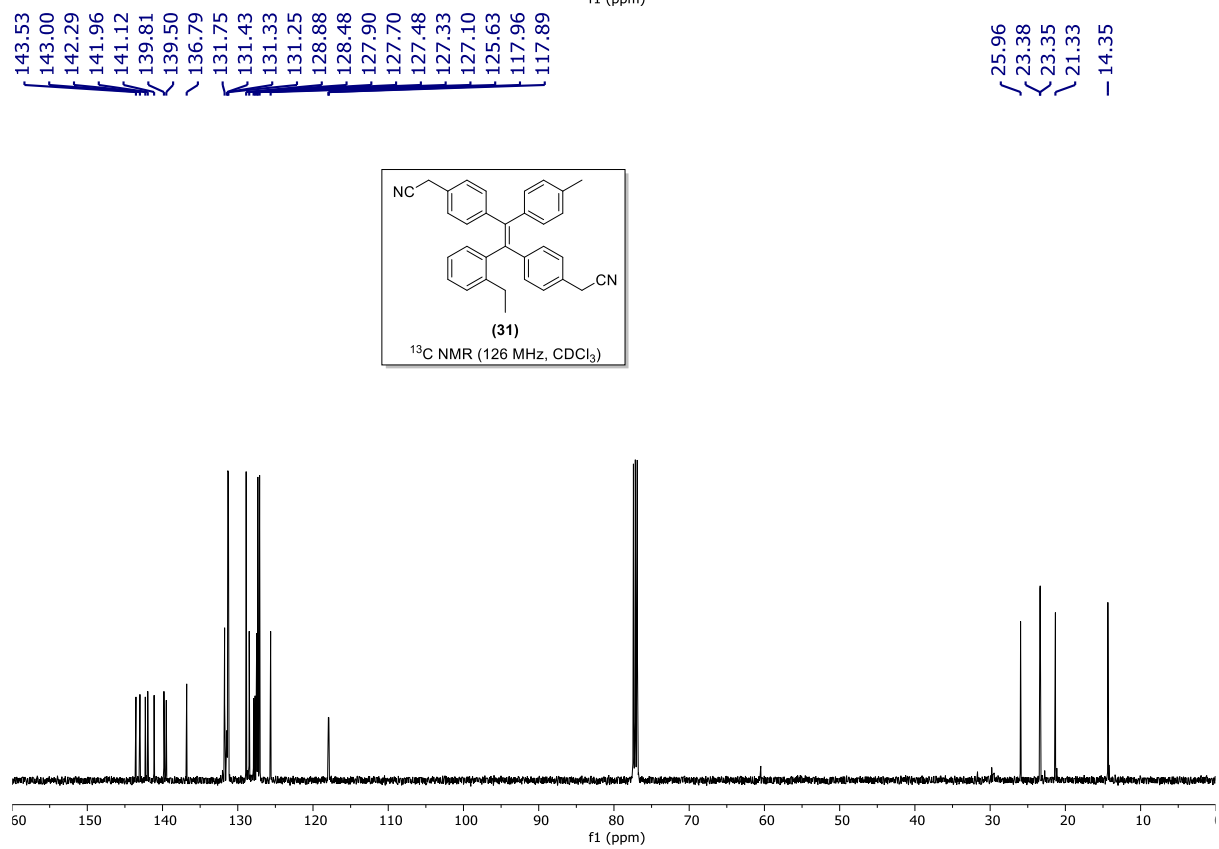

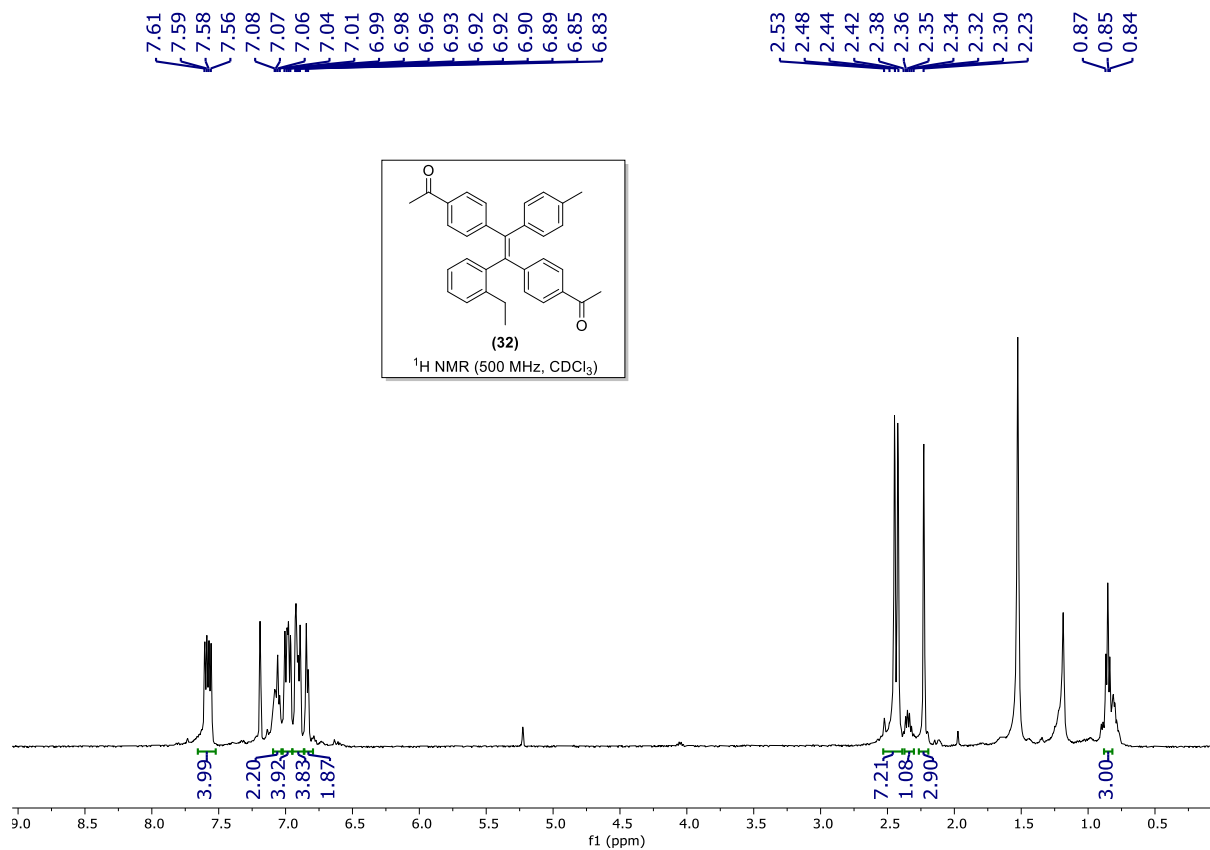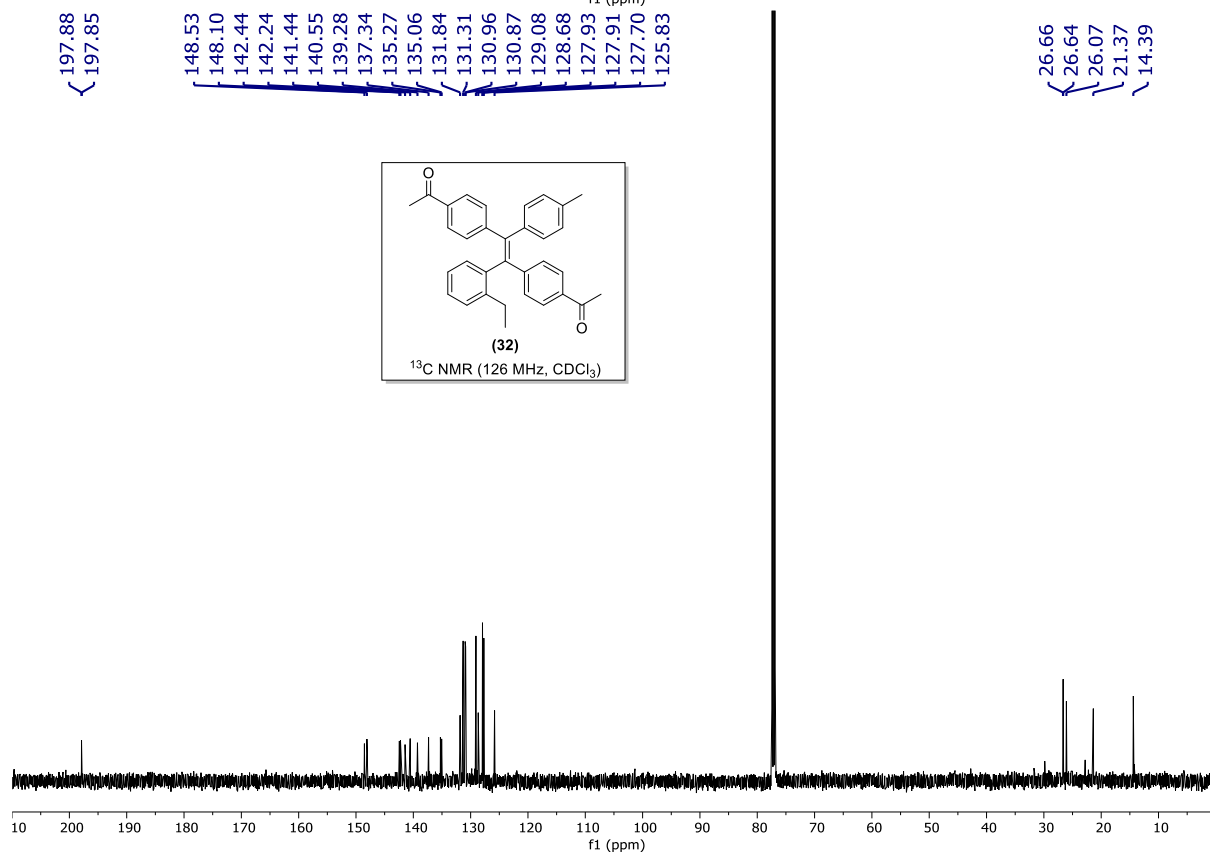

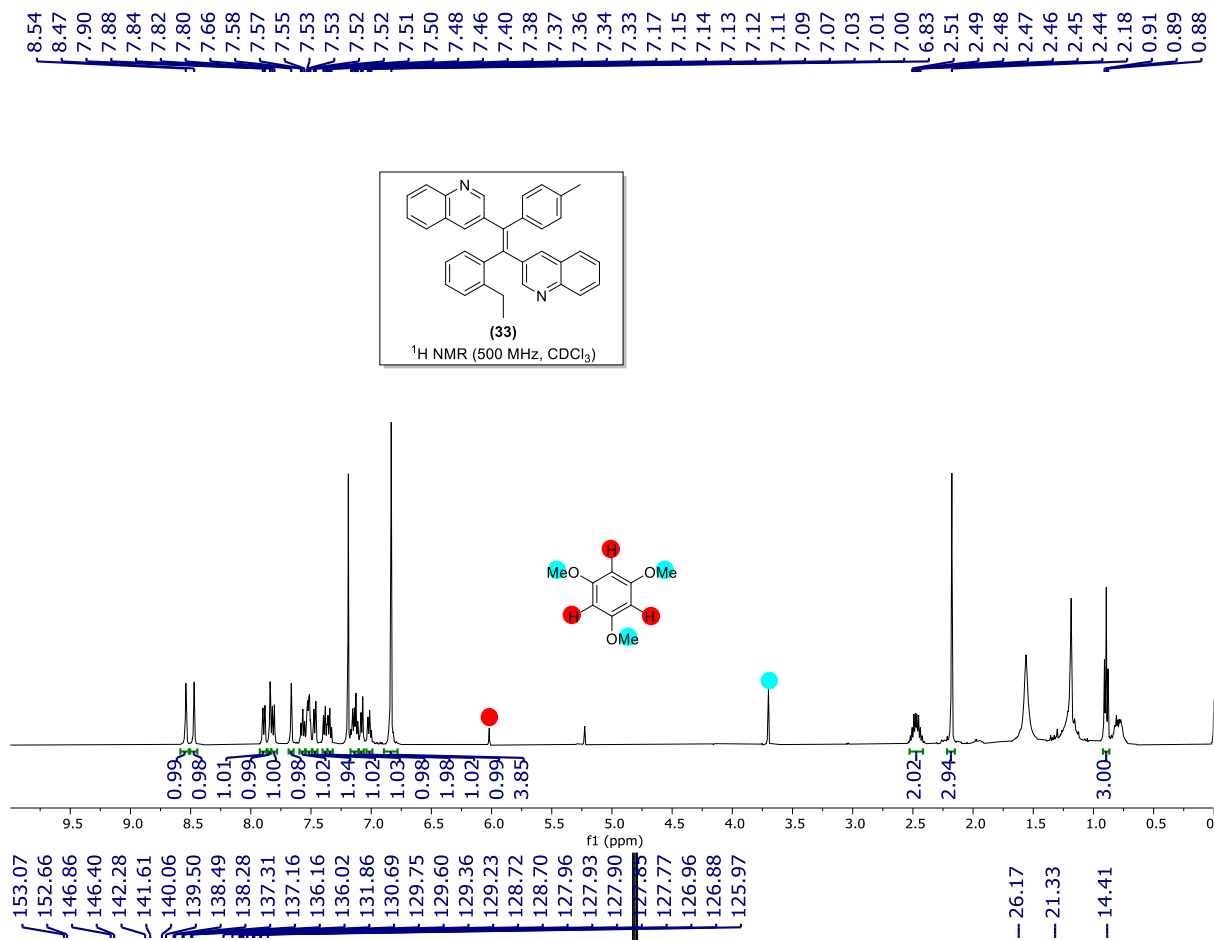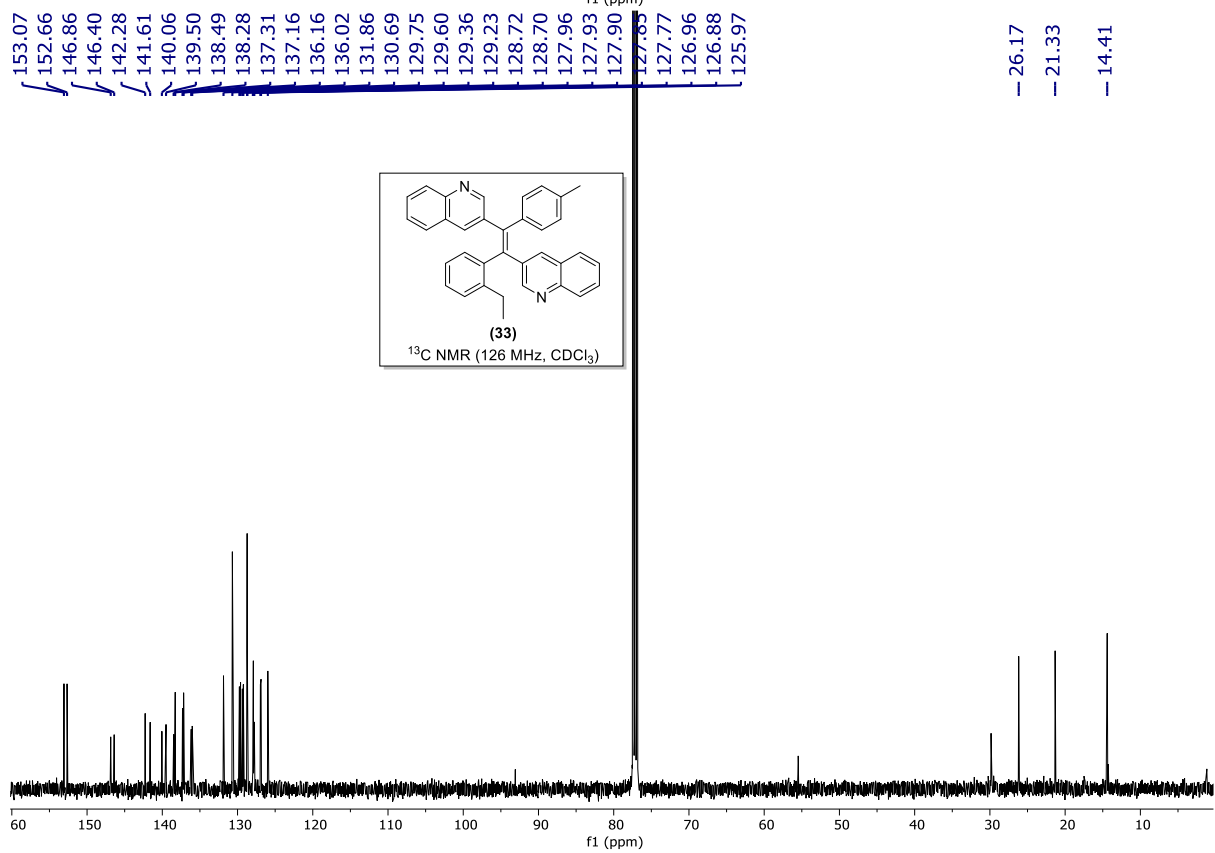

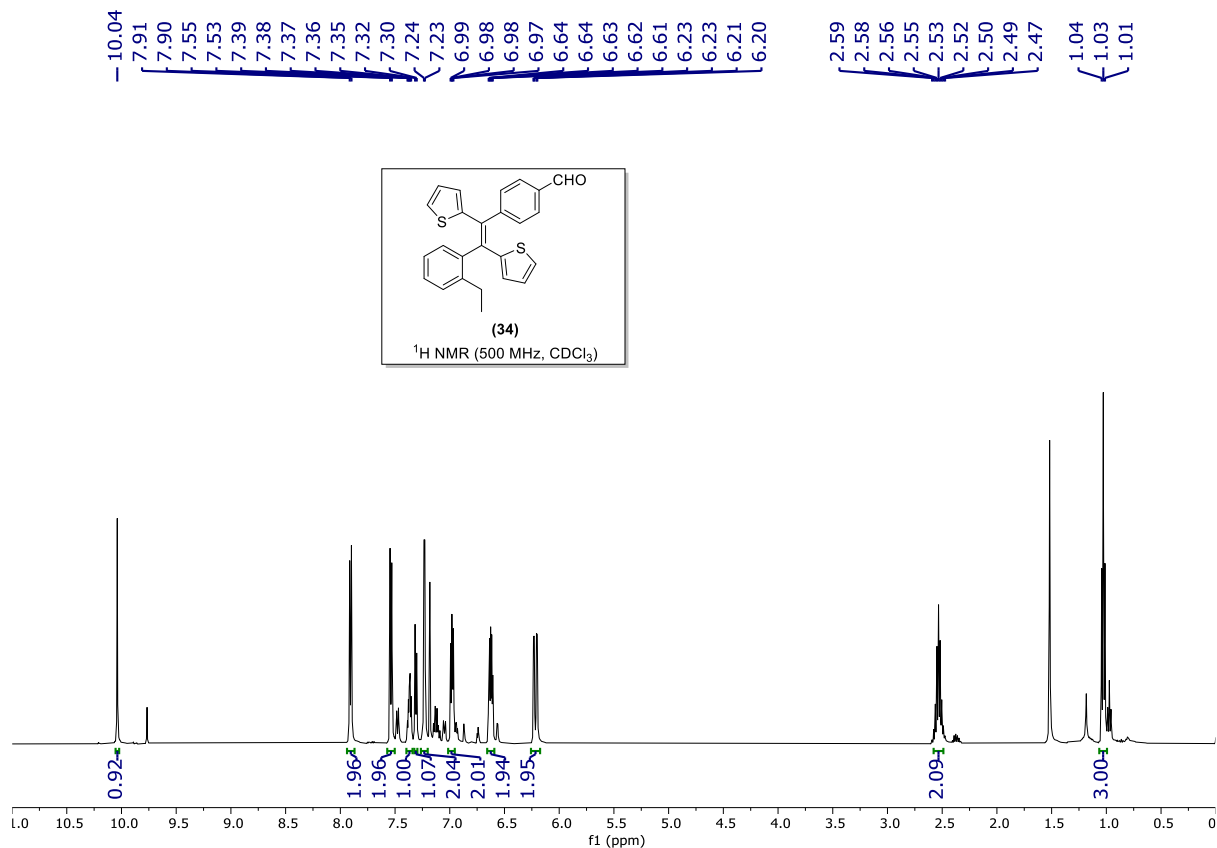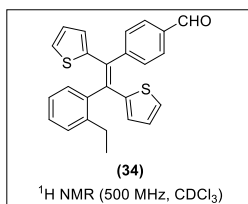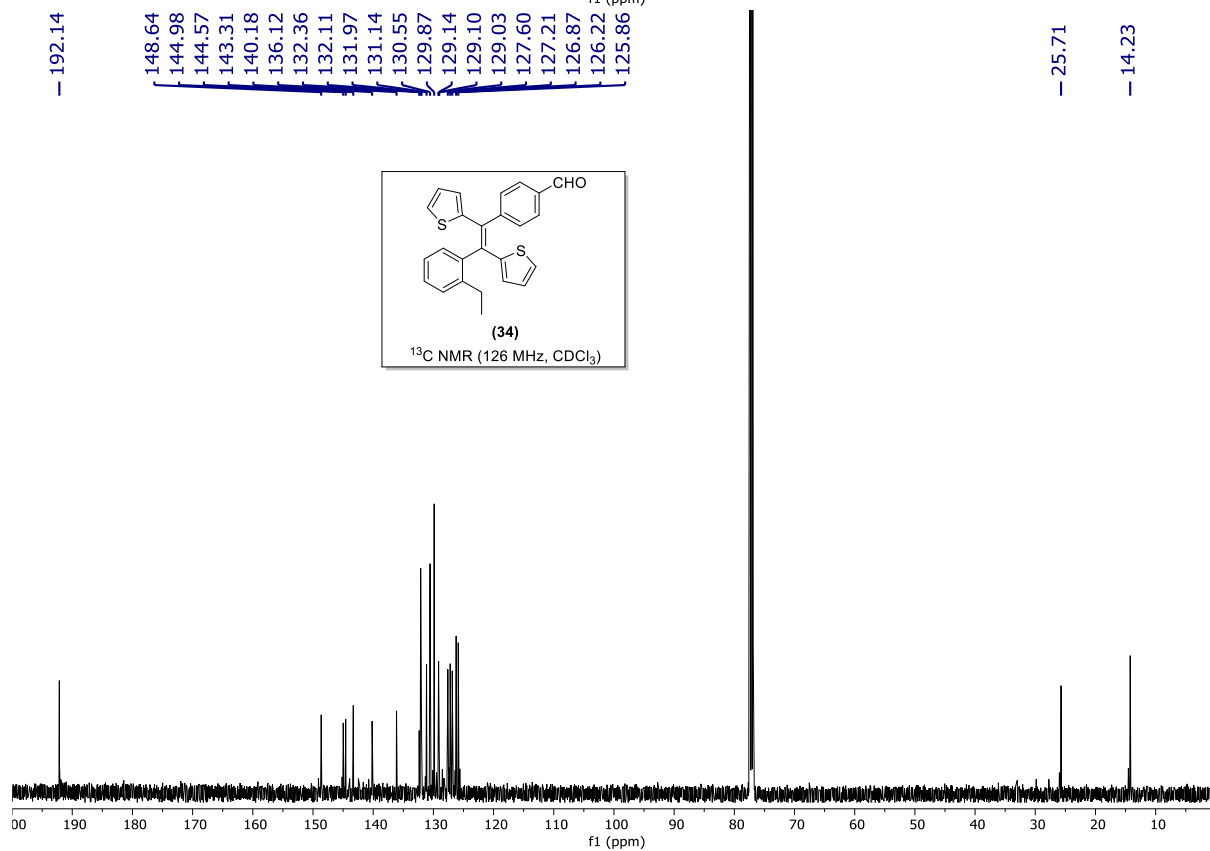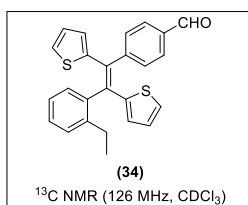

Supplement: d3ta03280a1.pdf [file d3ta03280a1.pdf]
